# Supplementary material
Source: publisher figshare collection journal article supplement (https://acs.figshare.com/ndownloader/files/5882559)
Supplement: Supplementary file 1 [file 5882559]

# om020627l.cif

data_compound2
#------------------------------------------------------------------------------
_audit_creation_date                  'Mon Aug 17 10:42:15 1998'
_audit_creation_method                'from TEXRAY.INF file'
_audit_update_record                   ?
#------------------------------------------------------------------------------
_computing_data_collection            'Rigaku/AFC Diffractometer Control'
_computing_cell_refinement            'Rigaku/AFC Diffractometer Control'
_computing_data_reduction             'teXsan'
_computing_structure_solution          'DIRDIF92 (PATTY)'
_computing_structure_refinement       'teXsan'
_computing_publication_material       'teXsan'
_computing_molecular_graphics          ?
#------------------------------------------------------------------------------
_chemical_compound_source              ?
_chemical_name_common                  ?
_chemical_formula_weight               1162.10
_chemical_formula_analytical           ?
_chemical_formula_sum                  'C44 H59 P Pd2 Ru2 S4 '
_chemical_formula_moiety               'C44 H59 P Pd2 Ru2 S4 '
_chemical_formula_structural           ?
_chemical_melting_point                ?
#------------------------------------------------------------------------------
_cell_length_a                         13.084(1)
_cell_length_b                         17.184(3)
_cell_length_c                         21.537(2)
_cell_angle_alpha                      90
_cell_angle_beta                       102.036(9)
_cell_angle_gamma                      90
_cell_volume                           4735.8(9)
_cell_formula_units_Z                  4
_cell_measurement_temperature          293.2
_cell_measurement_reflns_used          25
_cell_measurement_theta_min            15.7
_cell_measurement_theta_max            18.2
#------------------------------------------------------------------------------
_symmetry_cell_setting                 monoclinic
_symmetry_space_group_name_H-M        'P 21/c       '
_symmetry_Int_Tables_number            14
_symmetry_space_group_name_Hall        ?
loop_
_symmetry_equiv_pos_as_xyz
x,y,z
-x,1/2+y,1/2-z
-x,-y,-z
x,1/2-y,1/2+z
#------------------------------------------------------------------------------
_exptl_crystal_description            'prismatic'
_exptl_crystal_colour                 'black'
_exptl_crystal_size_max                0.380
_exptl_crystal_size_mid                0.300
_exptl_crystal_size_min                0.200
_exptl_crystal_density_diffrn          1.630
_exptl_crystal_density_method         'not measured'
_exptl_crystal_F_000                   2328.00
_exptl_absorpt_coefficient_mu          1.612
_exptl_absorpt_correction_type         psi-scan
_exptl_absorpt_process_details        '(North, Phillips & Mathews, 1968)'
_exptl_absorpt_correction_T_min        0.865
_exptl_absorpt_correction_T_max        0.997
_exptl_special_details
;
 ?
;
#------------------------------------------------------------------------------
_diffrn_special_details
;
 ?
;
_diffrn_ambient_temperature            293.2
_diffrn_radiation_wavelength           0.7107
_diffrn_radiation_type                'Mo K\a'
_diffrn_radiation_source              'Rigaku rotating anode'
_diffrn_radiation_monochromator        graphite
_diffrn_radiation_detector            'scintillation counter'
_diffrn_measurement_device_type       'Rigaku AFC7R'
_diffrn_measurement_method             \w-2\q

_diffrn_standards_number              3
_diffrn_standards_interval_count      150
_diffrn_standards_decay_%             0.35
loop_
_diffrn_standard_refln_index_h
_diffrn_standard_refln_index_k
_diffrn_standard_refln_index_l
      0      -3     -1
      0      -3      1
      1      -2      2
_diffrn_reflns_number                  11715
_reflns_number_total                   11231
_reflns_number_gt                      3883
_reflns_observed_criterion             '>3.0sigma(I)'
_diffrn_reflns_av_R_equivalents        0.150
_diffrn_reflns_av_sigmaI/netI          0.000
_diffrn_reflns_limit_h_min             0
_diffrn_reflns_limit_h_max             16
_diffrn_reflns_limit_k_min             0
_diffrn_reflns_limit_k_max             22
_diffrn_reflns_limit_l_min             -27
_diffrn_reflns_limit_l_max             27
_diffrn_reflns_theta_min               0.00
_diffrn_reflns_theta_max               0.00
_diffrn_reflns_reduction_process      'Lp corrections applied'
_diffrn_orient_matrix_UB_11           -0.02175
_diffrn_orient_matrix_UB_12           -0.02848
_diffrn_orient_matrix_UB_13            0.03562
_diffrn_orient_matrix_UB_21           -0.06781
_diffrn_orient_matrix_UB_22           -0.01401
_diffrn_orient_matrix_UB_23           -0.02878
_diffrn_orient_matrix_UB_31            0.03218
_diffrn_orient_matrix_UB_32           -0.04877
_diffrn_orient_matrix_UB_33           -0.01253
#------------------------------------------------------------------------------
loop_
_atom_type_symbol
_atom_type_description
_atom_type_scat_dispersion_real
_atom_type_scat_dispersion_imag
_atom_type_scat_source
  'C'  'C'   0.003 0.002 
;International Tables for Crystallography
(1992, Vol. C, Tables 4.2.6.8 and 6.1.1.1)
;
  'H'  'H'   0.000 0.000 
;International Tables for Crystallography
(1992, Vol. C, Table 6.1.1.2)
;
  'S'  'S'   0.125 0.123 
;International Tables for Crystallography
(1992, Vol. C, Tables 4.2.6.8 and 6.1.1.1)
;
  'P'  'P'   0.102 0.094 
;International Tables for Crystallography
(1992, Vol. C, Tables 4.2.6.8 and 6.1.1.1)
;
  'RuRu'   -1.259 0.836 
;International Tables for Crystallography
(1992, Vol. C, Tables 4.2.6.8 and 6.1.1.1)
;
  'PdPd'   -0.999 1.007 
;International Tables for Crystallography
(1992, Vol. C, Tables 4.2.6.8 and 6.1.1.1)
;
#------------------------------------------------------------------------------
loop_
_atom_site_label
_atom_site_type_symbol
_atom_site_fract_x
_atom_site_fract_y
_atom_site_fract_z
_atom_site_U_iso_or_equiv
_atom_site_adp_type
_atom_site_occupancy
_atom_site_calc_flag
_atom_site_refinement_flags
_atom_site_disorder_assembly
_atom_site_disorder_group
 Pd(1)  Pd 0.03684(9)  0.22888(7)  -0.05757(5) 0.0296(3)   Uani 1.00 d ? ? ?
 Pd(2)  Pd 0.22223(9)  0.20275(7)  0.03207(5)  0.0300(3)   Uani 1.00 d ? ? ?
 Ru(1)  Ru 0.23616(10) 0.31942(7)  -0.06980(6) 0.0354(4)   Uani 1.00 d ? ? ?
 Ru(2)  Ru 0.22330(9)  0.17021(7)  -0.09790(5) 0.0277(3)   Uani 1.00 d ? ? ?
 S(1)   S  0.1070(3)   0.2626(2)   -0.1419(2)  0.035(1)    Uani 1.00 d ? ? ?
 S(2)   S  0.3483(3)   0.2256(2)   -0.0220(2)  0.037(1)    Uani 1.00 d ? ? ?
 S(3)   S  0.0553(3)   0.1686(2)   0.0412(2)   0.036(1)    Uani 1.00 d ? ? ?
 S(4)   S  0.3131(3)   0.2033(3)   0.1371(2)   0.049(1)    Uani 1.00 d ? ? ?
 P(1)   P  -0.1394(3)  0.2451(2)   -0.0924(2)  0.034(1)    Uani 1.00 d ? ? ?
 C(1)   C  0.006(1)    0.222(1)    0.1025(7)   0.052(6)    Uani 1.00 d ? ? ?
 C(2)   C  0.040(1)    0.304(1)    0.1090(7)   0.064(6)    Uani 1.00 d ? ? ?
 C(3)   C  0.042(1)    0.179(1)    0.1655(7)   0.070(7)    Uani 1.00 d ? ? ?
 C(4)   C  0.453(1)    0.208(1)    0.1421(7)   0.055(6)    Uani 1.00 d ? ? ?
 C(5)   C  0.506(1)    0.246(1)    0.2016(10)  0.109(9)    Uani 1.00 d ? ? ?
 C(6)   C  0.494(1)    0.128(1)    0.1364(9)   0.084(8)    Uani 1.00 d ? ? ?
 C(7)   C  0.333(2)    0.410(1)    -0.094(2)   0.083(9)    Uani 1.00 d ? ? ?
 C(8)   C  0.232(2)    0.427(1)    -0.1186(9)  0.071(8)    Uani 1.00 d ? ? ?
 C(9)   C  0.175(2)    0.4350(9)   -0.070(1)   0.063(7)    Uani 1.00 d ? ? ?
 C(10)  C  0.247(3)    0.428(1)    -0.016(1)   0.076(9)    Uani 1.00 d ? ? ?
 C(11)  C  0.342(2)    0.412(1)    -0.029(1)   0.10(1)     Uani 1.00 d ? ? ?
 C(12)  C  0.416(2)    0.398(2)    -0.131(2)   0.23(2)     Uani 1.00 d ? ? ?
 C(13)  C  0.180(3)    0.438(1)    -0.190(1)   0.15(1)     Uani 1.00 d ? ? ?
 C(14)  C  0.061(2)    0.455(1)    -0.082(2)   0.16(1)     Uani 1.00 d ? ? ?
 C(15)  C  0.212(3)    0.437(1)    0.051(1)    0.20(2)     Uani 1.00 d ? ? ?
 C(16)  C  0.434(3)    0.403(2)    0.029(2)    0.28(2)     Uani 1.00 d ? ? ?
 C(17)  C  0.289(1)    0.0537(8)   -0.0859(7)  0.032(5)    Uani 1.00 d ? ? ?
 C(18)  C  0.183(1)    0.0458(8)   -0.1058(7)  0.037(5)    Uani 1.00 d ? ? ?
 C(19)  C  0.151(1)    0.0797(8)   -0.1668(7)  0.038(5)    Uani 1.00 d ? ? ?
 C(20)  C  0.246(1)    0.1086(9)   -0.1826(7)  0.044(6)    Uani 1.00 d ? ? ?
 C(21)  C  0.332(1)    0.0944(8)   -0.1332(8)  0.041(5)    Uani 1.00 d ? ? ?
 C(22)  C  0.352(1)    0.019(1)    -0.0261(8)  0.064(6)    Uani 1.00 d ? ? ?
 C(23)  C  0.112(1)    -0.0002(9)  -0.0711(7)  0.055(6)    Uani 1.00 d ? ? ?
 C(24)  C  0.044(1)    0.080(1)    -0.2090(8)  0.068(7)    Uani 1.00 d ? ? ?
 C(25)  C  0.251(2)    0.150(1)    -0.2462(8)  0.081(8)    Uani 1.00 d ? ? ?
 C(26)  C  0.446(1)    0.109(1)    -0.1314(10) 0.072(7)    Uani 1.00 d ? ? ?
 C(27)  C  -0.199(1)   0.1557(8)   -0.1261(7)  0.032(5)    Uani 1.00 d ? ? ?
 C(28)  C  -0.162(1)   0.0867(10)  -0.0979(7)  0.041(5)    Uani 1.00 d ? ? ?
 C(29)  C  -0.205(1)   0.017(1)    -0.1212(8)  0.049(6)    Uani 1.00 d ? ? ?
 C(30)  C  -0.285(1)   0.0134(10)  -0.1749(9)  0.052(6)    Uani 1.00 d ? ? ?
 C(31)  C  -0.320(1)   0.083(1)    -0.2028(8)  0.064(7)    Uani 1.00 d ? ? ?
 C(32)  C  -0.277(1)   0.1526(9)   -0.1801(8)  0.050(6)    Uani 1.00 d ? ? ?
 C(33)  C  -0.211(1)   0.2667(8)   -0.0308(7)  0.034(4)    Uani 1.00 d ? ? ?
 C(34)  C  -0.284(1)   0.216(1)    -0.0137(9)  0.066(7)    Uani 1.00 d ? ? ?
 C(35)  C  -0.334(2)   0.233(1)    0.035(1)    0.084(9)    Uani 1.00 d ? ? ?
 C(36)  C  -0.308(2)   0.300(1)    0.0684(9)   0.082(8)    Uani 1.00 d ? ? ?
 C(37)  C  -0.241(2)   0.352(1)    0.0527(9)   0.065(7)    Uani 1.00 d ? ? ?
 C(38)  C  -0.190(1)   0.3348(10)  0.0044(8)   0.049(6)    Uani 1.00 d ? ? ?
 C(39)  C  -0.189(1)   0.3190(8)   -0.1534(7)  0.039(5)    Uani 1.00 d ? ? ?
 C(40)  C  -0.273(2)   0.367(1)    -0.1494(8)  0.070(7)    Uani 1.00 d ? ? ?
 C(41)  C  -0.312(2)   0.419(1)    -0.197(1)   0.094(9)    Uani 1.00 d ? ? ?
 C(42)  C  -0.264(2)   0.426(1)    -0.248(1)   0.088(9)    Uani 1.00 d ? ? ?
 C(43)  C  -0.186(2)   0.380(2)    -0.253(1)   0.115(10)   Uani 1.00 d ? ? ?
 C(44)  C  -0.146(1)   0.323(1)    -0.2054(8)  0.086(7)    Uani 1.00 d ? ? ?
 H(1)   H  -0.0687     0.2212      0.0919      0.0628      Uiso 1.00 calc ? ? ?
 H(2)   H  0.1146      0.3054      0.1188      0.0773      Uiso 1.00 calc ? ? ?
 H(3)   H  0.0151      0.3304      0.0702      0.0773      Uiso 1.00 calc ? ? ?
 H(4)   H  0.0140      0.3279      0.1420      0.0773      Uiso 1.00 calc ? ? ?
 H(5)   H  0.0137      0.2038      0.1976      0.0846      Uiso 1.00 calc ? ? ?
 H(6)   H  0.0184      0.1266      0.1610      0.0846      Uiso 1.00 calc ? ? ?
 H(7)   H  0.1160      0.1800      0.1769      0.0846      Uiso 1.00 calc ? ? ?
 H(8)   H  0.4648      0.2378      0.1074      0.0666      Uiso 1.00 calc ? ? ?
 H(9)   H  0.4966      0.2158      0.2369      0.1310      Uiso 1.00 calc ? ? ?
 H(10)  H  0.5783      0.2507      0.2020      0.1310      Uiso 1.00 calc ? ? ?
 H(11)  H  0.4769      0.2964      0.2041      0.1310      Uiso 1.00 calc ? ? ?
 H(12)  H  0.4805      0.0965      0.1699      0.1011      Uiso 1.00 calc ? ? ?
 H(13)  H  0.4617      0.1063      0.0967      0.1011      Uiso 1.00 calc ? ? ?
 H(14)  H  0.5677      0.1310      0.1391      0.1011      Uiso 1.00 calc ? ? ?
 H(15)  H  0.4806      0.3859      -0.1031     0.2743      Uiso 1.00 calc ? ? ?
 H(16)  H  0.3972      0.3570      -0.1606     0.2743      Uiso 1.00 calc ? ? ?
 H(17)  H  0.4245      0.4448      -0.1535     0.2743      Uiso 1.00 calc ? ? ?
 H(18)  H  0.1087      0.4520      -0.1941     0.1743      Uiso 1.00 calc ? ? ?
 H(19)  H  0.2154      0.4785      -0.2076     0.1743      Uiso 1.00 calc ? ? ?
 H(20)  H  0.1848      0.3911      -0.2125     0.1743      Uiso 1.00 calc ? ? ?
 H(21)  H  0.0507      0.5052      -0.1004     0.1887      Uiso 1.00 calc ? ? ?
 H(22)  H  0.0227      0.4178      -0.1103     0.1887      Uiso 1.00 calc ? ? ?
 H(23)  H  0.0386      0.4542      -0.0430     0.1887      Uiso 1.00 calc ? ? ?
 H(24)  H  0.2566      0.4733      0.0763      0.2449      Uiso 1.00 calc ? ? ?
 H(25)  H  0.1420      0.4544      0.0435      0.2449      Uiso 1.00 calc ? ? ?
 H(26)  H  0.2177      0.3877      0.0714      0.2449      Uiso 1.00 calc ? ? ?
 H(27)  H  0.4148      0.3674      0.0582      0.3343      Uiso 1.00 calc ? ? ?
 H(28)  H  0.4932      0.3833      0.0147      0.3343      Uiso 1.00 calc ? ? ?
 H(29)  H  0.4499      0.4519      0.0483      0.3343      Uiso 1.00 calc ? ? ?
 H(30)  H  0.3482      -0.0365     -0.0287     0.0766      Uiso 1.00 calc ? ? ?
 H(31)  H  0.4232      0.0344      -0.0209     0.0766      Uiso 1.00 calc ? ? ?
 H(32)  H  0.3255      0.0359      0.0093      0.0766      Uiso 1.00 calc ? ? ?
 H(33)  H  0.1164      0.0213      -0.0301     0.0662      Uiso 1.00 calc ? ? ?
 H(34)  H  0.0424      0.0024      -0.0945     0.0662      Uiso 1.00 calc ? ? ?
 H(35)  H  0.1344      -0.0530     -0.0672     0.0662      Uiso 1.00 calc ? ? ?
 H(36)  H  0.0240      0.1317      -0.2204     0.0821      Uiso 1.00 calc ? ? ?
 H(37)  H  0.0459      0.0505      -0.2463     0.0821      Uiso 1.00 calc ? ? ?
 H(38)  H  -0.0041     0.0568      -0.1872     0.0821      Uiso 1.00 calc ? ? ?
 H(39)  H  0.2697      0.2034      -0.2379     0.0966      Uiso 1.00 calc ? ? ?
 H(40)  H  0.3017      0.1256      -0.2652     0.0966      Uiso 1.00 calc ? ? ?
 H(41)  H  0.1846      0.1476      -0.2743     0.0966      Uiso 1.00 calc ? ? ?
 H(42)  H  0.4825      0.0613      -0.1265     0.0863      Uiso 1.00 calc ? ? ?
 H(43)  H  0.4531      0.1334      -0.1699     0.0863      Uiso 1.00 calc ? ? ?
 H(44)  H  0.4732      0.1424      -0.0967     0.0863      Uiso 1.00 calc ? ? ?
 H(45)  H  -0.1065     0.0872      -0.0616     0.0497      Uiso 1.00 calc ? ? ?
 H(46)  H  -0.1792     -0.0299     -0.1002     0.0591      Uiso 1.00 calc ? ? ?
 H(47)  H  -0.3147     -0.0348     -0.1914     0.0628      Uiso 1.00 calc ? ? ?
 H(48)  H  -0.3751     0.0826      -0.2392     0.0764      Uiso 1.00 calc ? ? ?
 H(49)  H  -0.3023     0.1993      -0.2015     0.0603      Uiso 1.00 calc ? ? ?
 H(50)  H  -0.2985     0.1677      -0.0358     0.0796      Uiso 1.00 calc ? ? ?
 H(51)  H  -0.3851     0.1994      0.0455      0.1010      Uiso 1.00 calc ? ? ?
 H(52)  H  -0.3392     0.3109      0.1037      0.0981      Uiso 1.00 calc ? ? ?
 H(53)  H  -0.2280     0.4005      0.0746      0.0780      Uiso 1.00 calc ? ? ?
 H(54)  H  -0.1391     0.3700      -0.0050     0.0586      Uiso 1.00 calc ? ? ?
 H(55)  H  -0.3038     0.3638      -0.1132     0.0844      Uiso 1.00 calc ? ? ?
 H(56)  H  -0.3718     0.4500      -0.1951     0.1132      Uiso 1.00 calc ? ? ?
 H(57)  H  -0.2880     0.4638      -0.2793     0.1060      Uiso 1.00 calc ? ? ?
 H(58)  H  -0.1548     0.3850      -0.2889     0.1377      Uiso 1.00 calc ? ? ?
 H(59)  H  -0.0903     0.2892      -0.2100     0.1028      Uiso 1.00 calc ? ? ?

loop_
_atom_site_aniso_label
_atom_site_aniso_U_11
_atom_site_aniso_U_22
_atom_site_aniso_U_33
_atom_site_aniso_U_12
_atom_site_aniso_U_13
_atom_site_aniso_U_23
 Pd(1)  0.0271(6)   0.0370(8)   0.0245(6)   0.0007(6)   0.0047(5)   0.0028(6)  
 Pd(2)  0.0289(6)   0.0366(8)   0.0236(6)   -0.0028(6)  0.0035(5)   -0.0004(6) 
 Ru(1)  0.0429(8)   0.0274(8)   0.0379(7)   -0.0053(7)  0.0131(6)   0.0011(6)  
 Ru(2)  0.0301(7)   0.0296(7)   0.0242(6)   0.0000(6)   0.0079(5)   -0.0006(6) 
 S(1)   0.037(2)    0.042(3)    0.027(2)    0.004(2)    0.008(2)    0.007(2)   
 S(2)   0.028(2)    0.042(3)    0.040(2)    -0.005(2)   0.003(2)    -0.001(2)  
 S(3)   0.036(2)    0.050(3)    0.023(2)    0.001(2)    0.007(2)    0.005(2)   
 S(4)   0.038(2)    0.081(4)    0.026(2)    0.001(2)    0.000(2)    -0.005(2)  
 P(1)   0.032(2)    0.037(3)    0.034(3)    0.004(2)    0.008(2)    0.010(2)   
 C(1)   0.05(1)     0.07(1)     0.04(1)     0.02(1)     0.021(8)    0.00(1)    
 C(2)   0.08(1)     0.07(1)     0.036(10)   0.02(1)     0.015(9)    -0.006(10) 
 C(3)   0.08(1)     0.11(2)     0.026(9)    -0.02(1)    0.022(9)    0.01(1)    
 C(4)   0.04(1)     0.08(1)     0.034(9)    -0.01(1)    -0.007(8)   0.01(1)    
 C(5)   0.05(1)     0.16(2)     0.10(2)     -0.02(1)    -0.02(1)    -0.07(2)   
 C(6)   0.03(1)     0.15(2)     0.08(1)     0.00(1)     0.008(10)   -0.02(1)   
 C(7)   0.07(2)     0.06(2)     0.14(2)     -0.01(1)    0.06(2)     0.00(2)    
 C(8)   0.14(2)     0.04(1)     0.04(1)     -0.03(1)    0.04(1)     0.005(9)   
 C(9)   0.05(1)     0.013(9)    0.13(2)     -0.005(9)   0.04(1)     -0.02(1)   
 C(10)  0.14(2)     0.02(1)     0.06(2)     -0.02(1)    0.00(2)     0.00(1)    
 C(11)  0.11(2)     0.02(1)     0.12(3)     -0.03(1)    -0.03(2)    0.02(1)    
 C(12)  0.18(3)     0.11(2)     0.48(6)     -0.02(2)    0.27(4)     -0.01(3)   
 C(13)  0.26(4)     0.10(2)     0.08(2)     -0.02(2)    0.04(2)     0.05(2)    
 C(14)  0.14(3)     0.06(2)     0.29(4)     0.03(2)     0.08(3)     -0.02(2)   
 C(15)  0.50(6)     0.03(1)     0.11(2)     -0.04(2)    0.13(3)     -0.03(1)   
 C(16)  0.24(4)     0.09(2)     0.37(5)     -0.07(2)    -0.24(4)    0.01(3)    
 C(17)  0.04(1)     0.034(10)   0.025(8)    0.009(8)    0.009(7)    0.004(7)   
 C(18)  0.06(1)     0.019(9)    0.04(1)     -0.002(8)   0.016(9)    -0.008(7)  
 C(19)  0.04(1)     0.032(10)   0.036(10)   -0.002(8)   0.004(8)    -0.011(8)  
 C(20)  0.06(1)     0.033(10)   0.05(1)     0.002(9)    0.030(10)   -0.009(8)  
 C(21)  0.05(1)     0.022(9)    0.05(1)     0.009(8)    0.008(9)    -0.001(8)  
 C(22)  0.05(1)     0.07(1)     0.06(1)     0.03(1)     -0.009(9)   0.00(1)    
 C(23)  0.08(1)     0.03(1)     0.05(1)     -0.008(10)  0.006(10)   -0.004(8)  
 C(24)  0.05(1)     0.08(2)     0.06(1)     0.01(1)     0.00(1)     -0.01(1)   
 C(25)  0.14(2)     0.07(1)     0.05(1)     0.05(1)     0.04(1)     0.02(1)    
 C(26)  0.04(1)     0.06(1)     0.12(2)     -0.003(10)  0.03(1)     -0.01(1)   
 C(27)  0.027(9)    0.031(10)   0.041(9)    -0.001(7)   0.014(7)    0.003(8)   
 C(28)  0.028(9)    0.05(1)     0.05(1)     0.008(9)    0.010(8)    0.018(9)   
 C(29)  0.03(1)     0.06(1)     0.06(1)     0.001(9)    0.013(9)    0.01(1)    
 C(30)  0.06(1)     0.04(1)     0.06(1)     -0.004(10)  0.04(1)     -0.015(10) 
 C(31)  0.05(1)     0.08(2)     0.05(1)     0.00(1)     0.001(10)   0.00(1)    
 C(32)  0.05(1)     0.03(1)     0.06(1)     0.002(9)    0.001(9)    -0.003(9)  
 C(33)  0.043(9)    0.024(8)    0.036(9)    0.003(8)    0.008(7)    0.007(8)   
 C(34)  0.05(1)     0.07(1)     0.09(2)     -0.01(1)    0.04(1)     -0.01(1)   
 C(35)  0.11(2)     0.07(2)     0.09(2)     -0.01(1)    0.07(1)     -0.01(1)   
 C(36)  0.08(2)     0.12(2)     0.06(1)     0.00(2)     0.05(1)     -0.01(1)   
 C(37)  0.07(1)     0.07(1)     0.06(1)     0.00(1)     0.03(1)     -0.01(1)   
 C(38)  0.05(1)     0.04(1)     0.06(1)     0.001(9)    0.014(9)    0.002(9)   
 C(39)  0.05(1)     0.018(9)    0.046(10)   0.004(8)    -0.001(8)   0.017(8)   
 C(40)  0.09(2)     0.07(1)     0.05(1)     0.03(1)     -0.01(1)    0.01(1)    
 C(41)  0.13(2)     0.06(2)     0.08(2)     0.03(1)     -0.01(2)    0.02(1)    
 C(42)  0.06(2)     0.08(2)     0.11(2)     -0.03(1)    -0.03(1)    0.06(1)    
 C(43)  0.02(1)     0.21(3)     0.11(2)     0.00(1)     0.01(1)     0.10(2)    
 C(44)  0.028(10)   0.16(2)     0.06(1)     0.04(1)     0.001(9)    0.06(1)    
#------------------------------------------------------------------------------
_refine_special_details
;
;

_refine_ls_structure_factor_coef       F
_refine_ls_matrix_type                 full
_refine_ls_weighting_scheme            calc
_refine_ls_weighting_details
   'w = 1/[\s^2^(Fo) + 0.00022|Fo|^2^]'
_refine_ls_hydrogen_treatment          noref
_refine_ls_extinction_method           none
_refine_ls_extinction_coef             ?
_refine_ls_abs_structure_details       ?
_refine_ls_abs_structure_Flack         ?
_refine_ls_number_reflns               3883
_refine_ls_number_parameters           479
_refine_ls_number_restraints           0
_refine_ls_number_constraints          0
_refine_ls_R_factor_all                0.0562
_refine_ls_R_factor_gt                 0.0562
_refine_ls_wR_factor_all               ?
_refine_ls_wR_factor_ref               0.0504
_refine_ls_wR_factor_gt                0.0504
_refine_ls_goodness_of_fit_all         ?
_refine_ls_goodness_of_fit_ref         1.396
_refine_ls_shift/su_max                1.4669
_refine_ls_shift/su_mean               0.0030
_refine_diff_density_min               -0.95
_refine_diff_density_max               0.96
#------------------------------------------------------------------------------
_geom_special_details
;
 ?
;
loop_
_geom_bond_atom_site_label_1
_geom_bond_atom_site_label_2
_geom_bond_distance
_geom_bond_site_symmetry_1
_geom_bond_site_symmetry_2
_geom_bond_publ_flag
 Pd(1)     Pd(2)     2.804(2)   1_555 1_555 yes
 Pd(1)     Ru(1)     3.095(2)   1_555 1_555 yes
 Pd(1)     Ru(2)     2.934(2)   1_555 1_555 yes
 Pd(1)     S(1)      2.273(4)   1_555 1_555 yes
 Pd(1)     S(3)      2.332(4)   1_555 1_555 yes
 Pd(1)     P(1)      2.289(4)   1_555 1_555 yes
 Pd(2)     Ru(1)     3.006(2)   1_555 1_555 yes
 Pd(2)     Ru(2)     2.857(2)   1_555 1_555 yes
 Pd(2)     S(2)      2.243(4)   1_555 1_555 yes
 Pd(2)     S(3)      2.309(4)   1_555 1_555 yes
 Pd(2)     S(4)      2.326(4)   1_555 1_555 yes
 Ru(1)     Ru(2)     2.632(2)   1_555 1_555 yes
 Ru(1)     S(1)      2.264(4)   1_555 1_555 yes
 Ru(1)     S(2)      2.277(4)   1_555 1_555 yes
 Ru(1)     C(7)      2.13(2)    1_555 1_555 yes
 Ru(1)     C(8)      2.12(2)    1_555 1_555 yes
 Ru(1)     C(9)      2.14(2)    1_555 1_555 yes
 Ru(1)     C(10)     2.19(2)    1_555 1_555 yes
 Ru(1)     C(11)     2.17(2)    1_555 1_555 yes
 Ru(2)     S(1)      2.265(4)   1_555 1_555 yes
 Ru(2)     S(2)      2.267(4)   1_555 1_555 yes
 Ru(2)     C(17)     2.17(1)    1_555 1_555 yes
 Ru(2)     C(18)     2.20(1)    1_555 1_555 yes
 Ru(2)     C(19)     2.22(1)    1_555 1_555 yes
 Ru(2)     C(20)     2.18(1)    1_555 1_555 yes
 Ru(2)     C(21)     2.18(1)    1_555 1_555 yes
 S(3)      C(1)      1.84(2)    1_555 1_555 yes
 S(4)      C(4)      1.81(2)    1_555 1_555 yes
 P(1)      C(27)     1.80(1)    1_555 1_555 yes
 P(1)      C(33)     1.82(1)    1_555 1_555 yes
 P(1)      C(39)     1.85(1)    1_555 1_555 yes
 C(1)      C(2)      1.47(2)    1_555 1_555 yes
 C(1)      C(3)      1.53(2)    1_555 1_555 yes
 C(4)      C(5)      1.48(2)    1_555 1_555 yes
 C(4)      C(6)      1.49(2)    1_555 1_555 yes
 C(7)      C(8)      1.35(3)    1_555 1_555 yes
 C(7)      C(11)     1.38(3)    1_555 1_555 yes
 C(7)      C(12)     1.50(3)    1_555 1_555 yes
 C(8)      C(9)      1.40(2)    1_555 1_555 yes
 C(8)      C(13)     1.56(3)    1_555 1_555 yes
 C(9)      C(10)     1.35(3)    1_555 1_555 yes
 C(9)      C(14)     1.50(3)    1_555 1_555 yes
 C(10)     C(11)     1.37(3)    1_555 1_555 yes
 C(10)     C(15)     1.59(3)    1_555 1_555 yes
 C(11)     C(16)     1.54(3)    1_555 1_555 yes
 C(17)     C(18)     1.37(2)    1_555 1_555 yes
 C(17)     C(21)     1.44(2)    1_555 1_555 yes
 C(17)     C(22)     1.50(2)    1_555 1_555 yes
 C(18)     C(19)     1.42(2)    1_555 1_555 yes
 C(18)     C(23)     1.53(2)    1_555 1_555 yes
 C(19)     C(20)     1.44(2)    1_555 1_555 yes
 C(19)     C(24)     1.50(2)    1_555 1_555 yes
 C(20)     C(21)     1.40(2)    1_555 1_555 yes
 C(20)     C(25)     1.56(2)    1_555 1_555 yes
 C(21)     C(26)     1.50(2)    1_555 1_555 yes
 C(27)     C(28)     1.37(2)    1_555 1_555 yes
 C(27)     C(32)     1.38(2)    1_555 1_555 yes
 C(28)     C(29)     1.37(2)    1_555 1_555 yes
 C(29)     C(30)     1.39(2)    1_555 1_555 yes
 C(30)     C(31)     1.37(2)    1_555 1_555 yes
 C(31)     C(32)     1.37(2)    1_555 1_555 yes
 C(33)     C(34)     1.40(2)    1_555 1_555 yes
 C(33)     C(38)     1.39(2)    1_555 1_555 yes
 C(34)     C(35)     1.39(2)    1_555 1_555 yes
 C(35)     C(36)     1.36(2)    1_555 1_555 yes
 C(36)     C(37)     1.35(2)    1_555 1_555 yes
 C(37)     C(38)     1.38(2)    1_555 1_555 yes
 C(39)     C(40)     1.39(2)    1_555 1_555 yes
 C(39)     C(44)     1.36(2)    1_555 1_555 yes
 C(40)     C(41)     1.38(2)    1_555 1_555 yes
 C(41)     C(42)     1.37(3)    1_555 1_555 yes
 C(42)     C(43)     1.32(3)    1_555 1_555 yes
 C(43)     C(44)     1.44(2)    1_555 1_555 yes
#------------------------------------------------------------------------------
loop_
_geom_angle_atom_site_label_1
_geom_angle_atom_site_label_2
_geom_angle_atom_site_label_3
_geom_angle
_geom_angle_site_symmetry_1
_geom_angle_site_symmetry_2
_geom_angle_site_symmetry_3
_geom_angle_publ_flag
   Pd(2)     Pd(1)     Ru(1)     61.03(4)   1_555 1_555 1_555 yes
   Pd(2)     Pd(1)     Ru(2)     59.69(4)   1_555 1_555 1_555 yes
   Pd(2)     Pd(1)     S(1)      98.9(1)    1_555 1_555 1_555 yes
   Pd(2)     Pd(1)     S(3)      52.47(10)  1_555 1_555 1_555 yes
   Pd(2)     Pd(1)     P(1)      155.9(1)   1_555 1_555 1_555 yes
   Ru(1)     Pd(1)     Ru(2)     51.69(4)   1_555 1_555 1_555 yes
   Ru(1)     Pd(1)     S(1)      46.9(1)    1_555 1_555 1_555 yes
   Ru(1)     Pd(1)     S(3)      111.8(1)   1_555 1_555 1_555 yes
   Ru(1)     Pd(1)     P(1)      136.1(1)   1_555 1_555 1_555 yes
   Ru(2)     Pd(1)     S(1)      49.61(10)  1_555 1_555 1_555 yes
   Ru(2)     Pd(1)     S(3)      100.5(1)   1_555 1_555 1_555 yes
   Ru(2)     Pd(1)     P(1)      142.0(1)   1_555 1_555 1_555 yes
   S(1)      Pd(1)     S(3)      149.2(1)   1_555 1_555 1_555 yes
   S(1)      Pd(1)     P(1)      104.8(1)   1_555 1_555 1_555 yes
   S(3)      Pd(1)     P(1)      105.0(1)   1_555 1_555 1_555 yes
   Pd(1)     Pd(2)     Ru(1)     64.27(4)   1_555 1_555 1_555 yes
   Pd(1)     Pd(2)     Ru(2)     62.42(4)   1_555 1_555 1_555 yes
   Pd(1)     Pd(2)     S(2)      103.8(1)   1_555 1_555 1_555 yes
   Pd(1)     Pd(2)     S(3)      53.22(9)   1_555 1_555 1_555 yes
   Pd(1)     Pd(2)     S(4)      149.6(1)   1_555 1_555 1_555 yes
   Ru(1)     Pd(2)     Ru(2)     53.28(4)   1_555 1_555 1_555 yes
   Ru(1)     Pd(2)     S(2)      48.8(1)    1_555 1_555 1_555 yes
   Ru(1)     Pd(2)     S(3)      115.7(1)   1_555 1_555 1_555 yes
   Ru(1)     Pd(2)     S(4)      127.6(1)   1_555 1_555 1_555 yes
   Ru(2)     Pd(2)     S(2)      51.07(10)  1_555 1_555 1_555 yes
   Ru(2)     Pd(2)     S(3)      103.38(10) 1_555 1_555 1_555 yes
   Ru(2)     Pd(2)     S(4)      148.0(1)   1_555 1_555 1_555 yes
   S(2)      Pd(2)     S(3)      154.1(1)   1_555 1_555 1_555 yes
   S(2)      Pd(2)     S(4)      102.8(1)   1_555 1_555 1_555 yes
   S(3)      Pd(2)     S(4)      102.6(1)   1_555 1_555 1_555 yes
   Pd(1)     Ru(1)     Pd(2)     54.70(4)   1_555 1_555 1_555 yes
   Pd(1)     Ru(1)     Ru(2)     61.00(4)   1_555 1_555 1_555 yes
   Pd(1)     Ru(1)     S(1)      47.12(9)   1_555 1_555 1_555 yes
   Pd(1)     Ru(1)     S(2)      94.6(1)    1_555 1_555 1_555 yes
   Pd(1)     Ru(1)     C(7)      160.0(8)   1_555 1_555 1_555 yes
   Pd(1)     Ru(1)     C(8)      123.0(8)   1_555 1_555 1_555 yes
   Pd(1)     Ru(1)     C(9)      98.4(5)    1_555 1_555 1_555 yes
   Pd(1)     Ru(1)     C(10)     110.1(8)   1_555 1_555 1_555 yes
   Pd(1)     Ru(1)     C(11)     144(1)     1_555 1_555 1_555 yes
   Pd(2)     Ru(1)     Ru(2)     60.48(4)   1_555 1_555 1_555 yes
   Pd(2)     Ru(1)     S(1)      93.6(1)    1_555 1_555 1_555 yes
   Pd(2)     Ru(1)     S(2)      47.83(10)  1_555 1_555 1_555 yes
   Pd(2)     Ru(1)     C(7)      142.3(9)   1_555 1_555 1_555 yes
   Pd(2)     Ru(1)     C(8)      160.7(6)   1_555 1_555 1_555 yes
   Pd(2)     Ru(1)     C(9)      123.0(6)   1_555 1_555 1_555 yes
   Pd(2)     Ru(1)     C(10)     100.7(5)   1_555 1_555 1_555 yes
   Pd(2)     Ru(1)     C(11)     108.7(7)   1_555 1_555 1_555 yes
   Ru(2)     Ru(1)     S(1)      54.5(1)    1_555 1_555 1_555 yes
   Ru(2)     Ru(1)     S(2)      54.4(1)    1_555 1_555 1_555 yes
   Ru(2)     Ru(1)     C(7)      131.6(6)   1_555 1_555 1_555 yes
   Ru(2)     Ru(1)     C(8)      137.8(5)   1_555 1_555 1_555 yes
   Ru(2)     Ru(1)     C(9)      153.7(6)   1_555 1_555 1_555 yes
   Ru(2)     Ru(1)     C(10)     161.2(5)   1_555 1_555 1_555 yes
   Ru(2)     Ru(1)     C(11)     144.1(8)   1_555 1_555 1_555 yes
   S(1)      Ru(1)     S(2)      108.9(1)   1_555 1_555 1_555 yes
   S(1)      Ru(1)     C(7)      122.9(9)   1_555 1_555 1_555 yes
   S(1)      Ru(1)     C(8)      95.5(6)    1_555 1_555 1_555 yes
   S(1)      Ru(1)     C(9)      99.9(6)    1_555 1_555 1_555 yes
   S(1)      Ru(1)     C(10)     133.5(8)   1_555 1_555 1_555 yes
   S(1)      Ru(1)     C(11)     156.5(7)   1_555 1_555 1_555 yes
   S(2)      Ru(1)     C(7)      105.3(8)   1_555 1_555 1_555 yes
   S(2)      Ru(1)     C(8)      142.2(8)   1_555 1_555 1_555 yes
   S(2)      Ru(1)     C(9)      149.9(7)   1_555 1_555 1_555 yes
   S(2)      Ru(1)     C(10)     113.5(7)   1_555 1_555 1_555 yes
   S(2)      Ru(1)     C(11)     92.0(7)    1_555 1_555 1_555 yes
   C(7)      Ru(1)     C(8)      37.2(8)    1_555 1_555 1_555 yes
   C(7)      Ru(1)     C(9)      64.2(7)    1_555 1_555 1_555 yes
   C(7)      Ru(1)     C(10)     62.4(9)    1_555 1_555 1_555 yes
   C(7)      Ru(1)     C(11)     37.5(8)    1_555 1_555 1_555 yes
   C(8)      Ru(1)     C(9)      38.4(7)    1_555 1_555 1_555 yes
   C(8)      Ru(1)     C(10)     60.9(7)    1_555 1_555 1_555 yes
   C(8)      Ru(1)     C(11)     61.0(8)    1_555 1_555 1_555 yes
   C(9)      Ru(1)     C(10)     36.4(7)    1_555 1_555 1_555 yes
   C(9)      Ru(1)     C(11)     62.1(9)    1_555 1_555 1_555 yes
   C(10)     Ru(1)     C(11)     36.5(8)    1_555 1_555 1_555 yes
   Pd(1)     Ru(2)     Pd(2)     57.89(4)   1_555 1_555 1_555 yes
   Pd(1)     Ru(2)     Ru(1)     67.32(4)   1_555 1_555 1_555 yes
   Pd(1)     Ru(2)     S(1)      49.85(9)   1_555 1_555 1_555 yes
   Pd(1)     Ru(2)     S(2)      99.3(1)    1_555 1_555 1_555 yes
   Pd(1)     Ru(2)     C(17)     128.0(4)   1_555 1_555 1_555 yes
   Pd(1)     Ru(2)     C(18)     99.1(4)    1_555 1_555 1_555 yes
   Pd(1)     Ru(2)     C(19)     100.0(4)   1_555 1_555 1_555 yes
   Pd(1)     Ru(2)     C(20)     132.8(5)   1_555 1_555 1_555 yes
   Pd(1)     Ru(2)     C(21)     162.2(4)   1_555 1_555 1_555 yes
   Pd(2)     Ru(2)     Ru(1)     66.25(4)   1_555 1_555 1_555 yes
   Pd(2)     Ru(2)     S(1)      97.6(1)    1_555 1_555 1_555 yes
   Pd(2)     Ru(2)     S(2)      50.31(10)  1_555 1_555 1_555 yes
   Pd(2)     Ru(2)     C(17)     98.5(4)    1_555 1_555 1_555 yes
   Pd(2)     Ru(2)     C(18)     102.5(4)   1_555 1_555 1_555 yes
   Pd(2)     Ru(2)     C(19)     134.7(4)   1_555 1_555 1_555 yes
   Pd(2)     Ru(2)     C(20)     160.6(4)   1_555 1_555 1_555 yes
   Pd(2)     Ru(2)     C(21)     126.6(4)   1_555 1_555 1_555 yes
   Ru(1)     Ru(2)     S(1)      54.4(1)    1_555 1_555 1_555 yes
   Ru(1)     Ru(2)     S(2)      54.8(1)    1_555 1_555 1_555 yes
   Ru(1)     Ru(2)     C(17)     149.9(4)   1_555 1_555 1_555 yes
   Ru(1)     Ru(2)     C(18)     165.4(4)   1_555 1_555 1_555 yes
   Ru(1)     Ru(2)     C(19)     146.5(4)   1_555 1_555 1_555 yes
   Ru(1)     Ru(2)     C(20)     130.7(4)   1_555 1_555 1_555 yes
   Ru(1)     Ru(2)     C(21)     130.4(4)   1_555 1_555 1_555 yes
   S(1)      Ru(2)     S(2)      109.2(2)   1_555 1_555 1_555 yes
   S(1)      Ru(2)     C(17)     155.6(4)   1_555 1_555 1_555 yes
   S(1)      Ru(2)     C(18)     121.4(5)   1_555 1_555 1_555 yes
   S(1)      Ru(2)     C(19)     93.2(4)    1_555 1_555 1_555 yes
   S(1)      Ru(2)     C(20)     100.7(5)   1_555 1_555 1_555 yes
   S(1)      Ru(2)     C(21)     134.7(4)   1_555 1_555 1_555 yes
   S(2)      Ru(2)     C(17)     95.3(4)    1_555 1_555 1_555 yes
   S(2)      Ru(2)     C(18)     126.0(4)   1_555 1_555 1_555 yes
   S(2)      Ru(2)     C(19)     156.7(4)   1_555 1_555 1_555 yes
   S(2)      Ru(2)     C(20)     127.2(5)   1_555 1_555 1_555 yes
   S(2)      Ru(2)     C(21)     94.5(4)    1_555 1_555 1_555 yes
   C(17)     Ru(2)     C(18)     36.4(5)    1_555 1_555 1_555 yes
   C(17)     Ru(2)     C(19)     62.4(6)    1_555 1_555 1_555 yes
   C(17)     Ru(2)     C(20)     62.2(5)    1_555 1_555 1_555 yes
   C(17)     Ru(2)     C(21)     38.7(5)    1_555 1_555 1_555 yes
   C(18)     Ru(2)     C(19)     37.4(5)    1_555 1_555 1_555 yes
   C(18)     Ru(2)     C(20)     62.3(5)    1_555 1_555 1_555 yes
   C(18)     Ru(2)     C(21)     63.4(6)    1_555 1_555 1_555 yes
   C(19)     Ru(2)     C(20)     38.2(5)    1_555 1_555 1_555 yes
   C(19)     Ru(2)     C(21)     64.3(6)    1_555 1_555 1_555 yes
   C(20)     Ru(2)     C(21)     37.5(5)    1_555 1_555 1_555 yes
   Pd(1)     S(1)      Ru(1)     86.0(1)    1_555 1_555 1_555 yes
   Pd(1)     S(1)      Ru(2)     80.5(1)    1_555 1_555 1_555 yes
   Ru(1)     S(1)      Ru(2)     71.1(1)    1_555 1_555 1_555 yes
   Pd(2)     S(2)      Ru(1)     83.3(1)    1_555 1_555 1_555 yes
   Pd(2)     S(2)      Ru(2)     78.6(1)    1_555 1_555 1_555 yes
   Ru(1)     S(2)      Ru(2)     70.8(1)    1_555 1_555 1_555 yes
   Pd(1)     S(3)      Pd(2)     74.3(1)    1_555 1_555 1_555 yes
   Pd(1)     S(3)      C(1)      116.7(6)   1_555 1_555 1_555 yes
   Pd(2)     S(3)      C(1)      114.7(6)   1_555 1_555 1_555 yes
   Pd(2)     S(4)      C(4)      111.2(5)   1_555 1_555 1_555 yes
   Pd(1)     P(1)      C(27)     110.3(5)   1_555 1_555 1_555 yes
   Pd(1)     P(1)      C(33)     115.2(5)   1_555 1_555 1_555 yes
   Pd(1)     P(1)      C(39)     120.0(5)   1_555 1_555 1_555 yes
   C(27)     P(1)      C(33)     102.9(6)   1_555 1_555 1_555 yes
   C(27)     P(1)      C(39)     103.9(7)   1_555 1_555 1_555 yes
   C(33)     P(1)      C(39)     102.6(7)   1_555 1_555 1_555 yes
   S(3)      C(1)      C(2)      113(1)     1_555 1_555 1_555 yes
   S(3)      C(1)      C(3)      107(1)     1_555 1_555 1_555 yes
   S(3)      C(1)      H(1)      108(1)     1_555 1_555 1_555 no
   C(2)      C(1)      C(3)      110(1)     1_555 1_555 1_555 yes
   C(2)      C(1)      H(1)      108(1)     1_555 1_555 1_555 no
   C(3)      C(1)      H(1)      108(1)     1_555 1_555 1_555 no
   C(1)      C(2)      H(2)      109(1)     1_555 1_555 1_555 no
   C(1)      C(2)      H(3)      109(1)     1_555 1_555 1_555 no
   C(1)      C(2)      H(4)      109(1)     1_555 1_555 1_555 no
   H(2)      C(2)      H(3)      109(1)     1_555 1_555 1_555 no
   H(2)      C(2)      H(4)      109(1)     1_555 1_555 1_555 no
   H(3)      C(2)      H(4)      109(1)     1_555 1_555 1_555 no
   C(1)      C(3)      H(5)      109(1)     1_555 1_555 1_555 no
   C(1)      C(3)      H(6)      109(1)     1_555 1_555 1_555 no
   C(1)      C(3)      H(7)      109(1)     1_555 1_555 1_555 no
   H(5)      C(3)      H(6)      109(1)     1_555 1_555 1_555 no
   H(5)      C(3)      H(7)      109(1)     1_555 1_555 1_555 no
   H(6)      C(3)      H(7)      109(1)     1_555 1_555 1_555 no
   S(4)      C(4)      C(5)      110(1)     1_555 1_555 1_555 yes
   S(4)      C(4)      C(6)      109(1)     1_555 1_555 1_555 yes
   S(4)      C(4)      H(8)      108(1)     1_555 1_555 1_555 no
   C(5)      C(4)      C(6)      111(1)     1_555 1_555 1_555 yes
   C(5)      C(4)      H(8)      108(1)     1_555 1_555 1_555 no
   C(6)      C(4)      H(8)      108(1)     1_555 1_555 1_555 no
   C(4)      C(5)      H(9)      109(1)     1_555 1_555 1_555 no
   C(4)      C(5)      H(10)     109(1)     1_555 1_555 1_555 no
   C(4)      C(5)      H(11)     109(1)     1_555 1_555 1_555 no
   H(9)      C(5)      H(10)     109(2)     1_555 1_555 1_555 no
   H(9)      C(5)      H(11)     109(1)     1_555 1_555 1_555 no
   H(10)     C(5)      H(11)     109(2)     1_555 1_555 1_555 no
   C(4)      C(6)      H(12)     109(1)     1_555 1_555 1_555 no
   C(4)      C(6)      H(13)     109(1)     1_555 1_555 1_555 no
   C(4)      C(6)      H(14)     109(2)     1_555 1_555 1_555 no
   H(12)     C(6)      H(13)     109(2)     1_555 1_555 1_555 no
   H(12)     C(6)      H(14)     109(2)     1_555 1_555 1_555 no
   H(13)     C(6)      H(14)     109(1)     1_555 1_555 1_555 no
   Ru(1)     C(7)      C(8)      70(1)      1_555 1_555 1_555 yes
   Ru(1)     C(7)      C(11)     72(1)      1_555 1_555 1_555 yes
   Ru(1)     C(7)      C(12)     124(1)     1_555 1_555 1_555 yes
   C(8)      C(7)      C(11)     105(2)     1_555 1_555 1_555 yes
   C(8)      C(7)      C(12)     125(3)     1_555 1_555 1_555 yes
   C(11)     C(7)      C(12)     128(3)     1_555 1_555 1_555 yes
   Ru(1)     C(8)      C(7)      71(1)      1_555 1_555 1_555 yes
   Ru(1)     C(8)      C(9)      71.6(10)   1_555 1_555 1_555 yes
   Ru(1)     C(8)      C(13)     124(1)     1_555 1_555 1_555 yes
   C(7)      C(8)      C(9)      110(2)     1_555 1_555 1_555 yes
   C(7)      C(8)      C(13)     127(2)     1_555 1_555 1_555 yes
   C(9)      C(8)      C(13)     122(2)     1_555 1_555 1_555 yes
   Ru(1)     C(9)      C(8)      69(1)      1_555 1_555 1_555 yes
   Ru(1)     C(9)      C(10)     73(1)      1_555 1_555 1_555 yes
   Ru(1)     C(9)      C(14)     124(1)     1_555 1_555 1_555 yes
   C(8)      C(9)      C(10)     105(2)     1_555 1_555 1_555 yes
   C(8)      C(9)      C(14)     124(2)     1_555 1_555 1_555 yes
   C(10)     C(9)      C(14)     130(2)     1_555 1_555 1_555 yes
   Ru(1)     C(10)     C(9)      69(1)      1_555 1_555 1_555 yes
   Ru(1)     C(10)     C(11)     70(1)      1_555 1_555 1_555 yes
   Ru(1)     C(10)     C(15)     124(1)     1_555 1_555 1_555 yes
   C(9)      C(10)     C(11)     109(2)     1_555 1_555 1_555 yes
   C(9)      C(10)     C(15)     120(2)     1_555 1_555 1_555 yes
   C(11)     C(10)     C(15)     130(2)     1_555 1_555 1_555 yes
   Ru(1)     C(11)     C(7)      69(1)      1_555 1_555 1_555 yes
   Ru(1)     C(11)     C(10)     72(1)      1_555 1_555 1_555 yes
   Ru(1)     C(11)     C(16)     125(1)     1_555 1_555 1_555 yes
   C(7)      C(11)     C(10)     108(2)     1_555 1_555 1_555 yes
   C(7)      C(11)     C(16)     134(3)     1_555 1_555 1_555 yes
   C(10)     C(11)     C(16)     116(3)     1_555 1_555 1_555 yes
   C(7)      C(12)     H(15)     109(3)     1_555 1_555 1_555 no
   C(7)      C(12)     H(16)     109(2)     1_555 1_555 1_555 no
   C(7)      C(12)     H(17)     109(2)     1_555 1_555 1_555 no
   H(15)     C(12)     H(16)     109(2)     1_555 1_555 1_555 no
   H(15)     C(12)     H(17)     109(2)     1_555 1_555 1_555 no
   H(16)     C(12)     H(17)     109(4)     1_555 1_555 1_555 no
   C(8)      C(13)     H(18)     109(2)     1_555 1_555 1_555 no
   C(8)      C(13)     H(19)     109(2)     1_555 1_555 1_555 no
   C(8)      C(13)     H(20)     109(2)     1_555 1_555 1_555 no
   H(18)     C(13)     H(19)     109(2)     1_555 1_555 1_555 no
   H(18)     C(13)     H(20)     109(2)     1_555 1_555 1_555 no
   H(19)     C(13)     H(20)     109(2)     1_555 1_555 1_555 no
   C(9)      C(14)     H(21)     109(2)     1_555 1_555 1_555 no
   C(9)      C(14)     H(22)     109(2)     1_555 1_555 1_555 no
   C(9)      C(14)     H(23)     109(2)     1_555 1_555 1_555 no
   H(21)     C(14)     H(22)     109(3)     1_555 1_555 1_555 no
   H(21)     C(14)     H(23)     109(2)     1_555 1_555 1_555 no
   H(22)     C(14)     H(23)     109(2)     1_555 1_555 1_555 no
   C(10)     C(15)     H(24)     109(2)     1_555 1_555 1_555 no
   C(10)     C(15)     H(25)     109(2)     1_555 1_555 1_555 no
   C(10)     C(15)     H(26)     109(2)     1_555 1_555 1_555 no
   H(24)     C(15)     H(25)     109(2)     1_555 1_555 1_555 no
   H(24)     C(15)     H(26)     109(3)     1_555 1_555 1_555 no
   H(25)     C(15)     H(26)     109(3)     1_555 1_555 1_555 no
   C(11)     C(16)     H(27)     109(2)     1_555 1_555 1_555 no
   C(11)     C(16)     H(28)     109(3)     1_555 1_555 1_555 no
   C(11)     C(16)     H(29)     109(2)     1_555 1_555 1_555 no
   H(27)     C(16)     H(28)     109(2)     1_555 1_555 1_555 no
   H(27)     C(16)     H(29)     109(4)     1_555 1_555 1_555 no
   H(28)     C(16)     H(29)     109(3)     1_555 1_555 1_555 no
   Ru(2)     C(17)     C(18)     72.8(9)    1_555 1_555 1_555 yes
   Ru(2)     C(17)     C(21)     70.8(8)    1_555 1_555 1_555 yes
   Ru(2)     C(17)     C(22)     127(1)     1_555 1_555 1_555 yes
   C(18)     C(17)     C(21)     110(1)     1_555 1_555 1_555 yes
   C(18)     C(17)     C(22)     124(1)     1_555 1_555 1_555 yes
   C(21)     C(17)     C(22)     125(1)     1_555 1_555 1_555 yes
   Ru(2)     C(18)     C(17)     70.7(9)    1_555 1_555 1_555 yes
   Ru(2)     C(18)     C(19)     72.1(8)    1_555 1_555 1_555 yes
   Ru(2)     C(18)     C(23)     128(1)     1_555 1_555 1_555 yes
   C(17)     C(18)     C(19)     109(1)     1_555 1_555 1_555 yes
   C(17)     C(18)     C(23)     125(1)     1_555 1_555 1_555 yes
   C(19)     C(18)     C(23)     124(1)     1_555 1_555 1_555 yes
   Ru(2)     C(19)     C(18)     70.5(8)    1_555 1_555 1_555 yes
   Ru(2)     C(19)     C(20)     69.5(8)    1_555 1_555 1_555 yes
   Ru(2)     C(19)     C(24)     128(1)     1_555 1_555 1_555 yes
   C(18)     C(19)     C(20)     104(1)     1_555 1_555 1_555 yes
   C(18)     C(19)     C(24)     128(1)     1_555 1_555 1_555 yes
   C(20)     C(19)     C(24)     126(1)     1_555 1_555 1_555 yes
   Ru(2)     C(20)     C(19)     72.3(8)    1_555 1_555 1_555 yes
   Ru(2)     C(20)     C(21)     71.1(9)    1_555 1_555 1_555 yes
   Ru(2)     C(20)     C(25)     123(1)     1_555 1_555 1_555 yes
   C(19)     C(20)     C(21)     110(1)     1_555 1_555 1_555 yes
   C(19)     C(20)     C(25)     124(1)     1_555 1_555 1_555 yes
   C(21)     C(20)     C(25)     124(1)     1_555 1_555 1_555 yes
   Ru(2)     C(21)     C(17)     70.5(8)    1_555 1_555 1_555 yes
   Ru(2)     C(21)     C(20)     71.5(9)    1_555 1_555 1_555 yes
   Ru(2)     C(21)     C(26)     127(1)     1_555 1_555 1_555 yes
   C(17)     C(21)     C(20)     104(1)     1_555 1_555 1_555 yes
   C(17)     C(21)     C(26)     126(1)     1_555 1_555 1_555 yes
   C(20)     C(21)     C(26)     128(1)     1_555 1_555 1_555 yes
   C(17)     C(22)     H(30)     109(1)     1_555 1_555 1_555 no
   C(17)     C(22)     H(31)     109(1)     1_555 1_555 1_555 no
   C(17)     C(22)     H(32)     109(1)     1_555 1_555 1_555 no
   H(30)     C(22)     H(31)     109(1)     1_555 1_555 1_555 no
   H(30)     C(22)     H(32)     109(1)     1_555 1_555 1_555 no
   H(31)     C(22)     H(32)     109(1)     1_555 1_555 1_555 no
   C(18)     C(23)     H(33)     109(1)     1_555 1_555 1_555 no
   C(18)     C(23)     H(34)     109(1)     1_555 1_555 1_555 no
   C(18)     C(23)     H(35)     109(1)     1_555 1_555 1_555 no
   H(33)     C(23)     H(34)     109(1)     1_555 1_555 1_555 no
   H(33)     C(23)     H(35)     109(1)     1_555 1_555 1_555 no
   H(34)     C(23)     H(35)     109(1)     1_555 1_555 1_555 no
   C(19)     C(24)     H(36)     109(1)     1_555 1_555 1_555 no
   C(19)     C(24)     H(37)     109(1)     1_555 1_555 1_555 no
   C(19)     C(24)     H(38)     109(1)     1_555 1_555 1_555 no
   H(36)     C(24)     H(37)     109(1)     1_555 1_555 1_555 no
   H(36)     C(24)     H(38)     109(1)     1_555 1_555 1_555 no
   H(37)     C(24)     H(38)     109(1)     1_555 1_555 1_555 no
   C(20)     C(25)     H(39)     109(1)     1_555 1_555 1_555 no
   C(20)     C(25)     H(40)     109(1)     1_555 1_555 1_555 no
   C(20)     C(25)     H(41)     109(1)     1_555 1_555 1_555 no
   H(39)     C(25)     H(40)     109(2)     1_555 1_555 1_555 no
   H(39)     C(25)     H(41)     109(1)     1_555 1_555 1_555 no
   H(40)     C(25)     H(41)     109(1)     1_555 1_555 1_555 no
   C(21)     C(26)     H(42)     109(1)     1_555 1_555 1_555 no
   C(21)     C(26)     H(43)     109(1)     1_555 1_555 1_555 no
   C(21)     C(26)     H(44)     109(1)     1_555 1_555 1_555 no
   H(42)     C(26)     H(43)     109(1)     1_555 1_555 1_555 no
   H(42)     C(26)     H(44)     109(1)     1_555 1_555 1_555 no
   H(43)     C(26)     H(44)     109(1)     1_555 1_555 1_555 no
   P(1)      C(27)     C(28)     118(1)     1_555 1_555 1_555 yes
   P(1)      C(27)     C(32)     123(1)     1_555 1_555 1_555 yes
   C(28)     C(27)     C(32)     117(1)     1_555 1_555 1_555 yes
   C(27)     C(28)     C(29)     120(1)     1_555 1_555 1_555 yes
   C(27)     C(28)     H(45)     119(1)     1_555 1_555 1_555 no
   C(29)     C(28)     H(45)     119(1)     1_555 1_555 1_555 no
   C(28)     C(29)     C(30)     121(1)     1_555 1_555 1_555 yes
   C(28)     C(29)     H(46)     119(1)     1_555 1_555 1_555 no
   C(30)     C(29)     H(46)     119(1)     1_555 1_555 1_555 no
   C(29)     C(30)     C(31)     116(1)     1_555 1_555 1_555 yes
   C(29)     C(30)     H(47)     121(1)     1_555 1_555 1_555 no
   C(31)     C(30)     H(47)     121(2)     1_555 1_555 1_555 no
   C(30)     C(31)     C(32)     122(1)     1_555 1_555 1_555 yes
   C(30)     C(31)     H(48)     118(2)     1_555 1_555 1_555 no
   C(32)     C(31)     H(48)     118(2)     1_555 1_555 1_555 no
   C(27)     C(32)     C(31)     120(1)     1_555 1_555 1_555 yes
   C(27)     C(32)     H(49)     119(1)     1_555 1_555 1_555 no
   C(31)     C(32)     H(49)     119(1)     1_555 1_555 1_555 no
   P(1)      C(33)     C(34)     123(1)     1_555 1_555 1_555 yes
   P(1)      C(33)     C(38)     119(1)     1_555 1_555 1_555 yes
   C(34)     C(33)     C(38)     117(1)     1_555 1_555 1_555 yes
   C(33)     C(34)     C(35)     120(1)     1_555 1_555 1_555 yes
   C(33)     C(34)     H(50)     119(1)     1_555 1_555 1_555 no
   C(35)     C(34)     H(50)     119(1)     1_555 1_555 1_555 no
   C(34)     C(35)     C(36)     118(1)     1_555 1_555 1_555 yes
   C(34)     C(35)     H(51)     120(2)     1_555 1_555 1_555 no
   C(36)     C(35)     H(51)     120(1)     1_555 1_555 1_555 no
   C(35)     C(36)     C(37)     122(1)     1_555 1_555 1_555 yes
   C(35)     C(36)     H(52)     118(2)     1_555 1_555 1_555 no
   C(37)     C(36)     H(52)     118(2)     1_555 1_555 1_555 no
   C(36)     C(37)     C(38)     119(1)     1_555 1_555 1_555 yes
   C(36)     C(37)     H(53)     120(1)     1_555 1_555 1_555 no
   C(38)     C(37)     H(53)     120(1)     1_555 1_555 1_555 no
   C(33)     C(38)     C(37)     121(1)     1_555 1_555 1_555 yes
   C(33)     C(38)     H(54)     119(1)     1_555 1_555 1_555 no
   C(37)     C(38)     H(54)     119(1)     1_555 1_555 1_555 no
   P(1)      C(39)     C(40)     122(1)     1_555 1_555 1_555 yes
   P(1)      C(39)     C(44)     118(1)     1_555 1_555 1_555 yes
   C(40)     C(39)     C(44)     119(1)     1_555 1_555 1_555 yes
   C(39)     C(40)     C(41)     121(1)     1_555 1_555 1_555 yes
   C(39)     C(40)     H(55)     119(1)     1_555 1_555 1_555 no
   C(41)     C(40)     H(55)     119(2)     1_555 1_555 1_555 no
   C(40)     C(41)     C(42)     118(2)     1_555 1_555 1_555 yes
   C(40)     C(41)     H(56)     120(2)     1_555 1_555 1_555 no
   C(42)     C(41)     H(56)     120(2)     1_555 1_555 1_555 no
   C(41)     C(42)     C(43)     121(2)     1_555 1_555 1_555 yes
   C(41)     C(42)     H(57)     119(2)     1_555 1_555 1_555 no
   C(43)     C(42)     H(57)     119(2)     1_555 1_555 1_555 no
   C(42)     C(43)     C(44)     121(2)     1_555 1_555 1_555 yes
   C(42)     C(43)     H(58)     119(2)     1_555 1_555 1_555 no
   C(44)     C(43)     H(58)     119(2)     1_555 1_555 1_555 no
   C(39)     C(44)     C(43)     117(1)     1_555 1_555 1_555 yes
   C(39)     C(44)     H(59)     121(1)     1_555 1_555 1_555 no
   C(43)     C(44)     H(59)     121(1)     1_555 1_555 1_555 no
#------------------------------------------------------------------------------
loop_
_geom_torsion_atom_site_label_1
_geom_torsion_atom_site_label_2
_geom_torsion_atom_site_label_3
_geom_torsion_atom_site_label_4
_geom_torsion
_geom_torsion_site_symmetry_1
_geom_torsion_site_symmetry_2
_geom_torsion_site_symmetry_3
_geom_torsion_site_symmetry_4
_geom_torsion_publ_flag
   Pd(1)   Pd(2)   Ru(1)   Ru(2)   -73.64(5) 1_555 1_555 1_555 1_555 yes
   Pd(1)   Pd(2)   Ru(1)   S(1)    -28.4(1) 1_555 1_555 1_555 1_555 yes
   Pd(1)   Pd(2)   Ru(1)   S(2)    -140.7(1) 1_555 1_555 1_555 1_555 yes
   Pd(1)   Pd(2)   Ru(1)   C(7)    165.3(10) 1_555 1_555 1_555 1_555 yes
   Pd(1)   Pd(2)   Ru(1)   C(8)    89(2)    1_555 1_555 1_555 1_555 yes
   Pd(1)   Pd(2)   Ru(1)   C(9)    75.8(7)  1_555 1_555 1_555 1_555 yes
   Pd(1)   Pd(2)   Ru(1)   C(10)   107.1(9) 1_555 1_555 1_555 1_555 yes
   Pd(1)   Pd(2)   Ru(1)   C(11)   144.1(10) 1_555 1_555 1_555 1_555 yes
   Pd(1)   Pd(2)   Ru(2)   Ru(1)   77.21(5) 1_555 1_555 1_555 1_555 yes
   Pd(1)   Pd(2)   Ru(2)   S(1)    31.6(1)  1_555 1_555 1_555 1_555 yes
   Pd(1)   Pd(2)   Ru(2)   S(2)    140.3(1) 1_555 1_555 1_555 1_555 yes
   Pd(1)   Pd(2)   Ru(2)   C(17)   -129.9(4) 1_555 1_555 1_555 1_555 yes
   Pd(1)   Pd(2)   Ru(2)   C(18)   -93.0(4) 1_555 1_555 1_555 1_555 yes
   Pd(1)   Pd(2)   Ru(2)   C(19)   -70.6(6) 1_555 1_555 1_555 1_555 yes
   Pd(1)   Pd(2)   Ru(2)   C(20)   -129(1)  1_555 1_555 1_555 1_555 yes
   Pd(1)   Pd(2)   Ru(2)   C(21)   -159.1(5) 1_555 1_555 1_555 1_555 yes
   Pd(1)   Pd(2)   S(2)    Ru(1)   36.0(1)  1_555 1_555 1_555 1_555 yes
   Pd(1)   Pd(2)   S(2)    Ru(2)   -35.7(1) 1_555 1_555 1_555 1_555 yes
   Pd(1)   Pd(2)   S(3)    C(1)    -112.6(6) 1_555 1_555 1_555 1_555 yes
   Pd(1)   Pd(2)   S(4)    C(4)    -158.7(7) 1_555 1_555 1_555 1_555 yes
   Pd(1)   Ru(1)   Pd(2)   Ru(2)   73.64(5) 1_555 1_555 1_555 1_555 yes
   Pd(1)   Ru(1)   Pd(2)   S(2)    140.7(1) 1_555 1_555 1_555 1_555 yes
   Pd(1)   Ru(1)   Pd(2)   S(3)    -14.1(1) 1_555 1_555 1_555 1_555 yes
   Pd(1)   Ru(1)   Pd(2)   S(4)    -146.8(1) 1_555 1_555 1_555 1_555 yes
   Pd(1)   Ru(1)   Ru(2)   Pd(2)   -63.55(4) 1_555 1_555 1_555 1_555 yes
   Pd(1)   Ru(1)   Ru(2)   S(1)    55.9(1)  1_555 1_555 1_555 1_555 yes
   Pd(1)   Ru(1)   Ru(2)   S(2)    -120.6(1) 1_555 1_555 1_555 1_555 yes
   Pd(1)   Ru(1)   Ru(2)   C(17)   -127.5(7) 1_555 1_555 1_555 1_555 yes
   Pd(1)   Ru(1)   Ru(2)   C(18)   -22(1)   1_555 1_555 1_555 1_555 yes
   Pd(1)   Ru(1)   Ru(2)   C(19)   73.1(7)  1_555 1_555 1_555 1_555 yes
   Pd(1)   Ru(1)   Ru(2)   C(20)   127.7(6) 1_555 1_555 1_555 1_555 yes
   Pd(1)   Ru(1)   Ru(2)   C(21)   177.7(6) 1_555 1_555 1_555 1_555 yes
   Pd(1)   Ru(1)   S(1)    Ru(2)   -81.3(1) 1_555 1_555 1_555 1_555 yes
   Pd(1)   Ru(1)   S(2)    Pd(2)   -31.2(1) 1_555 1_555 1_555 1_555 yes
   Pd(1)   Ru(1)   S(2)    Ru(2)   49.03(8) 1_555 1_555 1_555 1_555 yes
   Pd(1)   Ru(1)   C(7)    C(8)    -5(3)    1_555 1_555 1_555 1_555 yes
   Pd(1)   Ru(1)   C(7)    C(11)   108(2)   1_555 1_555 1_555 1_555 yes
   Pd(1)   Ru(1)   C(7)    C(12)   -125(2)  1_555 1_555 1_555 1_555 yes
   Pd(1)   Ru(1)   C(8)    C(7)    177(1)   1_555 1_555 1_555 1_555 yes
   Pd(1)   Ru(1)   C(8)    C(9)    57(1)    1_555 1_555 1_555 1_555 yes
   Pd(1)   Ru(1)   C(8)    C(13)   -59(2)   1_555 1_555 1_555 1_555 yes
   Pd(1)   Ru(1)   C(9)    C(8)    -134(1)  1_555 1_555 1_555 1_555 yes
   Pd(1)   Ru(1)   C(9)    C(10)   112(1)   1_555 1_555 1_555 1_555 yes
   Pd(1)   Ru(1)   C(9)    C(14)   -16(2)   1_555 1_555 1_555 1_555 yes
   Pd(1)   Ru(1)   C(10)   C(9)    -76(1)   1_555 1_555 1_555 1_555 yes
   Pd(1)   Ru(1)   C(10)   C(11)   163(1)   1_555 1_555 1_555 1_555 yes
   Pd(1)   Ru(1)   C(10)   C(15)   36(2)    1_555 1_555 1_555 1_555 yes
   Pd(1)   Ru(1)   C(11)   C(7)    -146(1)  1_555 1_555 1_555 1_555 yes
   Pd(1)   Ru(1)   C(11)   C(10)   -27(2)   1_555 1_555 1_555 1_555 yes
   Pd(1)   Ru(1)   C(11)   C(16)   82(3)    1_555 1_555 1_555 1_555 yes
   Pd(1)   Ru(2)   Pd(2)   Ru(1)   -77.21(5) 1_555 1_555 1_555 1_555 yes
   Pd(1)   Ru(2)   Pd(2)   S(2)    -140.3(1) 1_555 1_555 1_555 1_555 yes
   Pd(1)   Ru(2)   Pd(2)   S(3)    35.1(1)  1_555 1_555 1_555 1_555 yes
   Pd(1)   Ru(2)   Pd(2)   S(4)    178.7(2) 1_555 1_555 1_555 1_555 yes
   Pd(1)   Ru(2)   Ru(1)   Pd(2)   63.55(4) 1_555 1_555 1_555 1_555 yes
   Pd(1)   Ru(2)   Ru(1)   S(1)    -55.9(1) 1_555 1_555 1_555 1_555 yes
   Pd(1)   Ru(2)   Ru(1)   S(2)    120.6(1) 1_555 1_555 1_555 1_555 yes
   Pd(1)   Ru(2)   Ru(1)   C(7)    -160(1)  1_555 1_555 1_555 1_555 yes
   Pd(1)   Ru(2)   Ru(1)   C(8)    -108(1)  1_555 1_555 1_555 1_555 yes
   Pd(1)   Ru(2)   Ru(1)   C(9)    -41(1)   1_555 1_555 1_555 1_555 yes
   Pd(1)   Ru(2)   Ru(1)   C(10)   65(2)    1_555 1_555 1_555 1_555 yes
   Pd(1)   Ru(2)   Ru(1)   C(11)   144(1)   1_555 1_555 1_555 1_555 yes
   Pd(1)   Ru(2)   S(1)    Ru(1)   89.0(1)  1_555 1_555 1_555 1_555 yes
   Pd(1)   Ru(2)   S(2)    Pd(2)   33.3(1)  1_555 1_555 1_555 1_555 yes
   Pd(1)   Ru(2)   S(2)    Ru(1)   -53.56(9) 1_555 1_555 1_555 1_555 yes
   Pd(1)   Ru(2)   C(17)   C(18)   44.1(10) 1_555 1_555 1_555 1_555 yes
   Pd(1)   Ru(2)   C(17)   C(21)   163.3(7) 1_555 1_555 1_555 1_555 yes
   Pd(1)   Ru(2)   C(17)   C(22)   -76(1)   1_555 1_555 1_555 1_555 yes
   Pd(1)   Ru(2)   C(18)   C(17)   -146.2(8) 1_555 1_555 1_555 1_555 yes
   Pd(1)   Ru(2)   C(18)   C(19)   94.6(9)  1_555 1_555 1_555 1_555 yes
   Pd(1)   Ru(2)   C(18)   C(23)   -25(1)   1_555 1_555 1_555 1_555 yes
   Pd(1)   Ru(2)   C(19)   C(18)   -92.0(9) 1_555 1_555 1_555 1_555 yes
   Pd(1)   Ru(2)   C(19)   C(20)   153.1(9) 1_555 1_555 1_555 1_555 yes
   Pd(1)   Ru(2)   C(19)   C(24)   32(1)    1_555 1_555 1_555 1_555 yes
   Pd(1)   Ru(2)   C(20)   C(19)   -37(1)   1_555 1_555 1_555 1_555 yes
   Pd(1)   Ru(2)   C(20)   C(21)   -157.7(7) 1_555 1_555 1_555 1_555 yes
   Pd(1)   Ru(2)   C(20)   C(25)   82(1)    1_555 1_555 1_555 1_555 yes
   Pd(1)   Ru(2)   C(21)   C(17)   -47(1)   1_555 1_555 1_555 1_555 yes
   Pd(1)   Ru(2)   C(21)   C(20)   65(1)    1_555 1_555 1_555 1_555 yes
   Pd(1)   Ru(2)   C(21)   C(26)   -169(1)  1_555 1_555 1_555 1_555 yes
   Pd(1)   S(1)    Ru(1)   Pd(2)   32.0(1)  1_555 1_555 1_555 1_555 yes
   Pd(1)   S(1)    Ru(1)   Ru(2)   81.3(1)  1_555 1_555 1_555 1_555 yes
   Pd(1)   S(1)    Ru(1)   S(2)    78.4(1)  1_555 1_555 1_555 1_555 yes
   Pd(1)   S(1)    Ru(1)   C(7)    -158.0(7) 1_555 1_555 1_555 1_555 yes
   Pd(1)   S(1)    Ru(1)   C(8)    -131.0(7) 1_555 1_555 1_555 1_555 yes
   Pd(1)   S(1)    Ru(1)   C(9)    -92.4(6) 1_555 1_555 1_555 1_555 yes
   Pd(1)   S(1)    Ru(1)   C(10)   -76.5(8) 1_555 1_555 1_555 1_555 yes
   Pd(1)   S(1)    Ru(1)   C(11)   -129(2)  1_555 1_555 1_555 1_555 yes
   Pd(1)   S(1)    Ru(2)   Pd(2)   -35.5(1) 1_555 1_555 1_555 1_555 yes
   Pd(1)   S(1)    Ru(2)   Ru(1)   -89.0(1) 1_555 1_555 1_555 1_555 yes
   Pd(1)   S(1)    Ru(2)   S(2)    -86.0(1) 1_555 1_555 1_555 1_555 yes
   Pd(1)   S(1)    Ru(2)   C(17)   95.2(9)  1_555 1_555 1_555 1_555 yes
   Pd(1)   S(1)    Ru(2)   C(18)   74.2(5)  1_555 1_555 1_555 1_555 yes
   Pd(1)   S(1)    Ru(2)   C(19)   100.4(4) 1_555 1_555 1_555 1_555 yes
   Pd(1)   S(1)    Ru(2)   C(20)   138.2(4) 1_555 1_555 1_555 1_555 yes
   Pd(1)   S(1)    Ru(2)   C(21)   156.6(6) 1_555 1_555 1_555 1_555 yes
   Pd(1)   S(3)    Pd(2)   Ru(1)   15.9(1)  1_555 1_555 1_555 1_555 yes
   Pd(1)   S(3)    Pd(2)   Ru(2)   -39.5(1) 1_555 1_555 1_555 1_555 yes
   Pd(1)   S(3)    Pd(2)   S(2)    -31.1(4) 1_555 1_555 1_555 1_555 yes
   Pd(1)   S(3)    Pd(2)   S(4)    159.3(1) 1_555 1_555 1_555 1_555 yes
   Pd(1)   S(3)    C(1)    C(2)    -48(1)   1_555 1_555 1_555 1_555 yes
   Pd(1)   S(3)    C(1)    C(3)    -170.6(9) 1_555 1_555 1_555 1_555 yes
   Pd(1)   P(1)    C(27)   C(28)   38(1)    1_555 1_555 1_555 1_555 yes
   Pd(1)   P(1)    C(27)   C(32)   -140(1)  1_555 1_555 1_555 1_555 yes
   Pd(1)   P(1)    C(33)   C(34)   -112(1)  1_555 1_555 1_555 1_555 yes
   Pd(1)   P(1)    C(33)   C(38)   62(1)    1_555 1_555 1_555 1_555 yes
   Pd(1)   P(1)    C(39)   C(40)   -137(1)  1_555 1_555 1_555 1_555 yes
   Pd(1)   P(1)    C(39)   C(44)   46(1)    1_555 1_555 1_555 1_555 yes
   Pd(2)   Pd(1)   Ru(1)   Ru(2)   72.67(5) 1_555 1_555 1_555 1_555 yes
   Pd(2)   Pd(1)   Ru(1)   S(1)    139.6(1) 1_555 1_555 1_555 1_555 yes
   Pd(2)   Pd(1)   Ru(1)   S(2)    28.1(1)  1_555 1_555 1_555 1_555 yes
   Pd(2)   Pd(1)   Ru(1)   C(7)    -152(2)  1_555 1_555 1_555 1_555 yes
   Pd(2)   Pd(1)   Ru(1)   C(8)    -156.8(6) 1_555 1_555 1_555 1_555 yes
   Pd(2)   Pd(1)   Ru(1)   C(9)    -124.7(7) 1_555 1_555 1_555 1_555 yes
   Pd(2)   Pd(1)   Ru(1)   C(10)   -89.1(7) 1_555 1_555 1_555 1_555 yes
   Pd(2)   Pd(1)   Ru(1)   C(11)   -71(1)   1_555 1_555 1_555 1_555 yes
   Pd(2)   Pd(1)   Ru(2)   Ru(1)   -75.34(5) 1_555 1_555 1_555 1_555 yes
   Pd(2)   Pd(1)   Ru(2)   S(1)    -137.2(1) 1_555 1_555 1_555 1_555 yes
   Pd(2)   Pd(1)   Ru(2)   S(2)    -29.9(1) 1_555 1_555 1_555 1_555 yes
   Pd(2)   Pd(1)   Ru(2)   C(17)   74.3(5)  1_555 1_555 1_555 1_555 yes
   Pd(2)   Pd(1)   Ru(2)   C(18)   99.1(4)  1_555 1_555 1_555 1_555 yes
   Pd(2)   Pd(1)   Ru(2)   C(19)   137.1(4) 1_555 1_555 1_555 1_555 yes
   Pd(2)   Pd(1)   Ru(2)   C(20)   159.5(6) 1_555 1_555 1_555 1_555 yes
   Pd(2)   Pd(1)   Ru(2)   C(21)   110(1)   1_555 1_555 1_555 1_555 yes
   Pd(2)   Pd(1)   S(1)    Ru(1)   -35.0(1) 1_555 1_555 1_555 1_555 yes
   Pd(2)   Pd(1)   S(1)    Ru(2)   36.4(1)  1_555 1_555 1_555 1_555 yes
   Pd(2)   Pd(1)   S(3)    C(1)    110.1(6) 1_555 1_555 1_555 1_555 yes
   Pd(2)   Pd(1)   P(1)    C(27)   -99.3(5) 1_555 1_555 1_555 1_555 yes
   Pd(2)   Pd(1)   P(1)    C(33)   16.7(6)  1_555 1_555 1_555 1_555 yes
   Pd(2)   Pd(1)   P(1)    C(39)   140.1(6) 1_555 1_555 1_555 1_555 yes
   Pd(2)   Ru(1)   Pd(1)   Ru(2)   -72.67(5) 1_555 1_555 1_555 1_555 yes
   Pd(2)   Ru(1)   Pd(1)   S(1)    -139.6(1) 1_555 1_555 1_555 1_555 yes
   Pd(2)   Ru(1)   Pd(1)   S(3)    13.6(1)  1_555 1_555 1_555 1_555 yes
   Pd(2)   Ru(1)   Pd(1)   P(1)    158.4(2) 1_555 1_555 1_555 1_555 yes
   Pd(2)   Ru(1)   Ru(2)   S(1)    119.5(1) 1_555 1_555 1_555 1_555 yes
   Pd(2)   Ru(1)   Ru(2)   S(2)    -57.1(1) 1_555 1_555 1_555 1_555 yes
   Pd(2)   Ru(1)   Ru(2)   C(17)   -64.0(7) 1_555 1_555 1_555 1_555 yes
   Pd(2)   Ru(1)   Ru(2)   C(18)   41(1)    1_555 1_555 1_555 1_555 yes
   Pd(2)   Ru(1)   Ru(2)   C(19)   136.7(7) 1_555 1_555 1_555 1_555 yes
   Pd(2)   Ru(1)   Ru(2)   C(20)   -168.7(6) 1_555 1_555 1_555 1_555 yes
   Pd(2)   Ru(1)   Ru(2)   C(21)   -118.7(6) 1_555 1_555 1_555 1_555 yes
   Pd(2)   Ru(1)   S(1)    Ru(2)   -49.37(8) 1_555 1_555 1_555 1_555 yes
   Pd(2)   Ru(1)   S(2)    Ru(2)   80.2(1)  1_555 1_555 1_555 1_555 yes
   Pd(2)   Ru(1)   C(7)    C(8)    -147(1)  1_555 1_555 1_555 1_555 yes
   Pd(2)   Ru(1)   C(7)    C(11)   -34(2)   1_555 1_555 1_555 1_555 yes
   Pd(2)   Ru(1)   C(7)    C(12)   91(3)    1_555 1_555 1_555 1_555 yes
   Pd(2)   Ru(1)   C(8)    C(7)    101(2)   1_555 1_555 1_555 1_555 yes
   Pd(2)   Ru(1)   C(8)    C(9)    -18(3)   1_555 1_555 1_555 1_555 yes
   Pd(2)   Ru(1)   C(8)    C(13)   -135(1)  1_555 1_555 1_555 1_555 yes
   Pd(2)   Ru(1)   C(9)    C(8)    172(1)   1_555 1_555 1_555 1_555 yes
   Pd(2)   Ru(1)   C(9)    C(10)   59(1)    1_555 1_555 1_555 1_555 yes
   Pd(2)   Ru(1)   C(9)    C(14)   -69(2)   1_555 1_555 1_555 1_555 yes
   Pd(2)   Ru(1)   C(10)   C(9)    -132(1)  1_555 1_555 1_555 1_555 yes
   Pd(2)   Ru(1)   C(10)   C(11)   107(1)   1_555 1_555 1_555 1_555 yes
   Pd(2)   Ru(1)   C(10)   C(15)   -19(2)   1_555 1_555 1_555 1_555 yes
   Pd(2)   Ru(1)   C(11)   C(7)    158(1)   1_555 1_555 1_555 1_555 yes
   Pd(2)   Ru(1)   C(11)   C(10)   -82(1)   1_555 1_555 1_555 1_555 yes
   Pd(2)   Ru(1)   C(11)   C(16)   27(3)    1_555 1_555 1_555 1_555 yes
   Pd(2)   Ru(2)   Pd(1)   Ru(1)   75.34(5) 1_555 1_555 1_555 1_555 yes
   Pd(2)   Ru(2)   Pd(1)   S(1)    137.2(1) 1_555 1_555 1_555 1_555 yes
   Pd(2)   Ru(2)   Pd(1)   S(3)    -34.2(1) 1_555 1_555 1_555 1_555 yes
   Pd(2)   Ru(2)   Pd(1)   P(1)    -166.0(2) 1_555 1_555 1_555 1_555 yes
   Pd(2)   Ru(2)   Ru(1)   S(1)    -119.5(1) 1_555 1_555 1_555 1_555 yes
   Pd(2)   Ru(2)   Ru(1)   S(2)    57.1(1)  1_555 1_555 1_555 1_555 yes
   Pd(2)   Ru(2)   Ru(1)   C(7)    135(1)   1_555 1_555 1_555 1_555 yes
   Pd(2)   Ru(2)   Ru(1)   C(8)    -171(1)  1_555 1_555 1_555 1_555 yes
   Pd(2)   Ru(2)   Ru(1)   C(9)    -105(1)  1_555 1_555 1_555 1_555 yes
   Pd(2)   Ru(2)   Ru(1)   C(10)   2(2)     1_555 1_555 1_555 1_555 yes
   Pd(2)   Ru(2)   Ru(1)   C(11)   81(1)    1_555 1_555 1_555 1_555 yes
   Pd(2)   Ru(2)   S(1)    Ru(1)   53.50(8) 1_555 1_555 1_555 1_555 yes
   Pd(2)   Ru(2)   S(2)    Ru(1)   -86.8(1) 1_555 1_555 1_555 1_555 yes
   Pd(2)   Ru(2)   C(17)   C(18)   99.6(8)  1_555 1_555 1_555 1_555 yes
   Pd(2)   Ru(2)   C(17)   C(21)   -141.2(8) 1_555 1_555 1_555 1_555 yes
   Pd(2)   Ru(2)   C(17)   C(22)   -21(1)   1_555 1_555 1_555 1_555 yes
   Pd(2)   Ru(2)   C(18)   C(17)   -87.3(8) 1_555 1_555 1_555 1_555 yes
   Pd(2)   Ru(2)   C(18)   C(19)   153.5(8) 1_555 1_555 1_555 1_555 yes
   Pd(2)   Ru(2)   C(18)   C(23)   32(1)    1_555 1_555 1_555 1_555 yes
   Pd(2)   Ru(2)   C(19)   C(18)   -37(1)   1_555 1_555 1_555 1_555 yes
   Pd(2)   Ru(2)   C(19)   C(20)   -152.7(8) 1_555 1_555 1_555 1_555 yes
   Pd(2)   Ru(2)   C(19)   C(24)   86(1)    1_555 1_555 1_555 1_555 yes
   Pd(2)   Ru(2)   C(20)   C(19)   79(1)    1_555 1_555 1_555 1_555 yes
   Pd(2)   Ru(2)   C(20)   C(21)   -40(1)   1_555 1_555 1_555 1_555 yes
   Pd(2)   Ru(2)   C(20)   C(25)   -160(1)  1_555 1_555 1_555 1_555 yes
   Pd(2)   Ru(2)   C(21)   C(17)   50(1)    1_555 1_555 1_555 1_555 yes
   Pd(2)   Ru(2)   C(21)   C(20)   164.3(7) 1_555 1_555 1_555 1_555 yes
   Pd(2)   Ru(2)   C(21)   C(26)   -70(1)   1_555 1_555 1_555 1_555 yes
   Pd(2)   S(2)    Ru(1)   Ru(2)   -80.2(1) 1_555 1_555 1_555 1_555 yes
   Pd(2)   S(2)    Ru(1)   S(1)    -77.3(1) 1_555 1_555 1_555 1_555 yes
   Pd(2)   S(2)    Ru(1)   C(7)    149.2(8) 1_555 1_555 1_555 1_555 yes
   Pd(2)   S(2)    Ru(1)   C(8)    155.4(8) 1_555 1_555 1_555 1_555 yes
   Pd(2)   S(2)    Ru(1)   C(9)    84(1)    1_555 1_555 1_555 1_555 yes
   Pd(2)   S(2)    Ru(1)   C(10)   83.1(8)  1_555 1_555 1_555 1_555 yes
   Pd(2)   S(2)    Ru(1)   C(11)   113.6(10) 1_555 1_555 1_555 1_555 yes
   Pd(2)   S(2)    Ru(2)   Ru(1)   86.8(1)  1_555 1_555 1_555 1_555 yes
   Pd(2)   S(2)    Ru(2)   S(1)    83.9(1)  1_555 1_555 1_555 1_555 yes
   Pd(2)   S(2)    Ru(2)   C(17)   -96.6(4) 1_555 1_555 1_555 1_555 yes
   Pd(2)   S(2)    Ru(2)   C(18)   -75.3(5) 1_555 1_555 1_555 1_555 yes
   Pd(2)   S(2)    Ru(2)   C(19)   -112(1)  1_555 1_555 1_555 1_555 yes
   Pd(2)   S(2)    Ru(2)   C(20)   -155.4(5) 1_555 1_555 1_555 1_555 yes
   Pd(2)   S(2)    Ru(2)   C(21)   -135.4(4) 1_555 1_555 1_555 1_555 yes
   Pd(2)   S(3)    Pd(1)   Ru(1)   -15.0(1) 1_555 1_555 1_555 1_555 yes
   Pd(2)   S(3)    Pd(1)   Ru(2)   37.8(1)  1_555 1_555 1_555 1_555 yes
   Pd(2)   S(3)    Pd(1)   S(1)    25.0(3)  1_555 1_555 1_555 1_555 yes
   Pd(2)   S(3)    Pd(1)   P(1)    -170.6(1) 1_555 1_555 1_555 1_555 yes
   Pd(2)   S(3)    C(1)    C(2)    35(1)    1_555 1_555 1_555 1_555 yes
   Pd(2)   S(3)    C(1)    C(3)    -86(1)   1_555 1_555 1_555 1_555 yes
   Pd(2)   S(4)    C(4)    C(5)    151(1)   1_555 1_555 1_555 1_555 yes
   Pd(2)   S(4)    C(4)    C(6)    -84(1)   1_555 1_555 1_555 1_555 yes
   Ru(1)   Pd(1)   Pd(2)   Ru(2)   -60.19(4) 1_555 1_555 1_555 1_555 yes
   Ru(1)   Pd(1)   Pd(2)   S(2)    -29.4(1) 1_555 1_555 1_555 1_555 yes
   Ru(1)   Pd(1)   Pd(2)   S(3)    164.0(1) 1_555 1_555 1_555 1_555 yes
   Ru(1)   Pd(1)   Pd(2)   S(4)    121.2(3) 1_555 1_555 1_555 1_555 yes
   Ru(1)   Pd(1)   Ru(2)   S(1)    -61.8(1) 1_555 1_555 1_555 1_555 yes
   Ru(1)   Pd(1)   Ru(2)   S(2)    45.4(1)  1_555 1_555 1_555 1_555 yes
   Ru(1)   Pd(1)   Ru(2)   C(17)   149.7(5) 1_555 1_555 1_555 1_555 yes
   Ru(1)   Pd(1)   Ru(2)   C(18)   174.4(4) 1_555 1_555 1_555 1_555 yes
   Ru(1)   Pd(1)   Ru(2)   C(19)   -147.6(4) 1_555 1_555 1_555 1_555 yes
   Ru(1)   Pd(1)   Ru(2)   C(20)   -125.1(6) 1_555 1_555 1_555 1_555 yes
   Ru(1)   Pd(1)   Ru(2)   C(21)   -174(1)  1_555 1_555 1_555 1_555 yes
   Ru(1)   Pd(1)   S(1)    Ru(2)   71.4(1)  1_555 1_555 1_555 1_555 yes
   Ru(1)   Pd(1)   S(3)    C(1)    95.1(6)  1_555 1_555 1_555 1_555 yes
   Ru(1)   Pd(1)   P(1)    C(27)   132.9(5) 1_555 1_555 1_555 1_555 yes
   Ru(1)   Pd(1)   P(1)    C(33)   -111.2(5) 1_555 1_555 1_555 1_555 yes
   Ru(1)   Pd(1)   P(1)    C(39)   12.3(7)  1_555 1_555 1_555 1_555 yes
   Ru(1)   Pd(2)   Pd(1)   Ru(2)   60.19(4) 1_555 1_555 1_555 1_555 yes
   Ru(1)   Pd(2)   Pd(1)   S(1)    28.6(1)  1_555 1_555 1_555 1_555 yes
   Ru(1)   Pd(2)   Pd(1)   S(3)    -164.0(1) 1_555 1_555 1_555 1_555 yes
   Ru(1)   Pd(2)   Pd(1)   P(1)    -141.2(3) 1_555 1_555 1_555 1_555 yes
   Ru(1)   Pd(2)   Ru(2)   S(1)    -45.6(1) 1_555 1_555 1_555 1_555 yes
   Ru(1)   Pd(2)   Ru(2)   S(2)    63.0(1)  1_555 1_555 1_555 1_555 yes
   Ru(1)   Pd(2)   Ru(2)   C(17)   152.9(4) 1_555 1_555 1_555 1_555 yes
   Ru(1)   Pd(2)   Ru(2)   C(18)   -170.2(4) 1_555 1_555 1_555 1_555 yes
   Ru(1)   Pd(2)   Ru(2)   C(19)   -147.8(6) 1_555 1_555 1_555 1_555 yes
   Ru(1)   Pd(2)   Ru(2)   C(20)   153(1)   1_555 1_555 1_555 1_555 yes
   Ru(1)   Pd(2)   Ru(2)   C(21)   123.7(5) 1_555 1_555 1_555 1_555 yes
   Ru(1)   Pd(2)   S(2)    Ru(2)   -71.7(1) 1_555 1_555 1_555 1_555 yes
   Ru(1)   Pd(2)   S(3)    C(1)    -96.7(6) 1_555 1_555 1_555 1_555 yes
   Ru(1)   Pd(2)   S(4)    C(4)    -55.3(7) 1_555 1_555 1_555 1_555 yes
   Ru(1)   Ru(2)   Pd(1)   S(1)    61.8(1)  1_555 1_555 1_555 1_555 yes
   Ru(1)   Ru(2)   Pd(1)   S(3)    -109.6(1) 1_555 1_555 1_555 1_555 yes
   Ru(1)   Ru(2)   Pd(1)   P(1)    118.7(2) 1_555 1_555 1_555 1_555 yes
   Ru(1)   Ru(2)   Pd(2)   S(2)    -63.0(1) 1_555 1_555 1_555 1_555 yes
   Ru(1)   Ru(2)   Pd(2)   S(3)    112.3(1) 1_555 1_555 1_555 1_555 yes
   Ru(1)   Ru(2)   Pd(2)   S(4)    -104.1(2) 1_555 1_555 1_555 1_555 yes
   Ru(1)   Ru(2)   C(17)   C(18)   155.9(7) 1_555 1_555 1_555 1_555 yes
   Ru(1)   Ru(2)   C(17)   C(21)   -84(1)   1_555 1_555 1_555 1_555 yes
   Ru(1)   Ru(2)   C(17)   C(22)   35(1)    1_555 1_555 1_555 1_555 yes
   Ru(1)   Ru(2)   C(18)   C(17)   -125(1)  1_555 1_555 1_555 1_555 yes
   Ru(1)   Ru(2)   C(18)   C(19)   115(1)   1_555 1_555 1_555 1_555 yes
   Ru(1)   Ru(2)   C(18)   C(23)   -5(2)    1_555 1_555 1_555 1_555 yes
   Ru(1)   Ru(2)   C(19)   C(18)   -155.7(7) 1_555 1_555 1_555 1_555 yes
   Ru(1)   Ru(2)   C(19)   C(20)   89(1)    1_555 1_555 1_555 1_555 yes
   Ru(1)   Ru(2)   C(19)   C(24)   -31(1)   1_555 1_555 1_555 1_555 yes
   Ru(1)   Ru(2)   C(20)   C(19)   -133.3(8) 1_555 1_555 1_555 1_555 yes
   Ru(1)   Ru(2)   C(20)   C(21)   106.4(9) 1_555 1_555 1_555 1_555 yes
   Ru(1)   Ru(2)   C(20)   C(25)   -13(1)   1_555 1_555 1_555 1_555 yes
   Ru(1)   Ru(2)   C(21)   C(17)   139.0(7) 1_555 1_555 1_555 1_555 yes
   Ru(1)   Ru(2)   C(21)   C(20)   -107.3(9) 1_555 1_555 1_555 1_555 yes
   Ru(1)   Ru(2)   C(21)   C(26)   17(1)    1_555 1_555 1_555 1_555 yes
   Ru(1)   S(1)    Pd(1)   Ru(2)   -71.4(1) 1_555 1_555 1_555 1_555 yes
   Ru(1)   S(1)    Pd(1)   S(3)    -54.8(3) 1_555 1_555 1_555 1_555 yes
   Ru(1)   S(1)    Pd(1)   P(1)    140.7(1) 1_555 1_555 1_555 1_555 yes
   Ru(1)   S(1)    Ru(2)   S(2)    3.0(1)   1_555 1_555 1_555 1_555 yes
   Ru(1)   S(1)    Ru(2)   C(17)   -175.8(9) 1_555 1_555 1_555 1_555 yes
   Ru(1)   S(1)    Ru(2)   C(18)   163.2(4) 1_555 1_555 1_555 1_555 yes
   Ru(1)   S(1)    Ru(2)   C(19)   -170.6(4) 1_555 1_555 1_555 1_555 yes
   Ru(1)   S(1)    Ru(2)   C(20)   -132.8(4) 1_555 1_555 1_555 1_555 yes
   Ru(1)   S(1)    Ru(2)   C(21)   -114.4(6) 1_555 1_555 1_555 1_555 yes
   Ru(1)   S(2)    Pd(2)   Ru(2)   71.7(1)  1_555 1_555 1_555 1_555 yes
   Ru(1)   S(2)    Pd(2)   S(3)    61.2(4)  1_555 1_555 1_555 1_555 yes
   Ru(1)   S(2)    Pd(2)   S(4)    -129.3(1) 1_555 1_555 1_555 1_555 yes
   Ru(1)   S(2)    Ru(2)   S(1)    -3.0(1)  1_555 1_555 1_555 1_555 yes
   Ru(1)   S(2)    Ru(2)   C(17)   176.5(4) 1_555 1_555 1_555 1_555 yes
   Ru(1)   S(2)    Ru(2)   C(18)   -162.1(5) 1_555 1_555 1_555 1_555 yes
   Ru(1)   S(2)    Ru(2)   C(19)   160(1)   1_555 1_555 1_555 1_555 yes
   Ru(1)   S(2)    Ru(2)   C(20)   117.8(5) 1_555 1_555 1_555 1_555 yes
   Ru(1)   S(2)    Ru(2)   C(21)   137.7(4) 1_555 1_555 1_555 1_555 yes
   Ru(1)   C(7)    C(8)    C(9)    61(1)    1_555 1_555 1_555 1_555 yes
   Ru(1)   C(7)    C(8)    C(13)   -119(2)  1_555 1_555 1_555 1_555 yes
   Ru(1)   C(7)    C(11)   C(10)   -62(1)   1_555 1_555 1_555 1_555 yes
   Ru(1)   C(7)    C(11)   C(16)   120(2)   1_555 1_555 1_555 1_555 yes
   Ru(1)   C(8)    C(7)    C(11)   -65(1)   1_555 1_555 1_555 1_555 yes
   Ru(1)   C(8)    C(7)    C(12)   119(2)   1_555 1_555 1_555 1_555 yes
   Ru(1)   C(8)    C(9)    C(10)   66(1)    1_555 1_555 1_555 1_555 yes
   Ru(1)   C(8)    C(9)    C(14)   -119(1)  1_555 1_555 1_555 1_555 yes
   Ru(1)   C(9)    C(8)    C(7)    -61(1)   1_555 1_555 1_555 1_555 yes
   Ru(1)   C(9)    C(8)    C(13)   119(1)   1_555 1_555 1_555 1_555 yes
   Ru(1)   C(9)    C(10)   C(11)   59(1)    1_555 1_555 1_555 1_555 yes
   Ru(1)   C(9)    C(10)   C(15)   -118(1)  1_555 1_555 1_555 1_555 yes
   Ru(1)   C(10)   C(9)    C(8)    -63(1)   1_555 1_555 1_555 1_555 yes
   Ru(1)   C(10)   C(9)    C(14)   122(2)   1_555 1_555 1_555 1_555 yes
   Ru(1)   C(10)   C(11)   C(7)    60(1)    1_555 1_555 1_555 1_555 yes
   Ru(1)   C(10)   C(11)   C(16)   -121(1)  1_555 1_555 1_555 1_555 yes
   Ru(1)   C(11)   C(7)    C(8)    63(1)    1_555 1_555 1_555 1_555 yes
   Ru(1)   C(11)   C(7)    C(12)   -121(2)  1_555 1_555 1_555 1_555 yes
   Ru(1)   C(11)   C(10)   C(9)    -59(1)   1_555 1_555 1_555 1_555 yes
   Ru(1)   C(11)   C(10)   C(15)   118(2)   1_555 1_555 1_555 1_555 yes
   Ru(2)   Pd(1)   Pd(2)   S(2)    30.8(1)  1_555 1_555 1_555 1_555 yes
   Ru(2)   Pd(1)   Pd(2)   S(3)    -135.8(1) 1_555 1_555 1_555 1_555 yes
   Ru(2)   Pd(1)   Pd(2)   S(4)    -178.6(3) 1_555 1_555 1_555 1_555 yes
   Ru(2)   Pd(1)   Ru(1)   S(1)    67.0(1)  1_555 1_555 1_555 1_555 yes
   Ru(2)   Pd(1)   Ru(1)   S(2)    -44.6(1) 1_555 1_555 1_555 1_555 yes
   Ru(2)   Pd(1)   Ru(1)   C(7)    134(2)   1_555 1_555 1_555 1_555 yes
   Ru(2)   Pd(1)   Ru(1)   C(8)    130.6(6) 1_555 1_555 1_555 1_555 yes
   Ru(2)   Pd(1)   Ru(1)   C(9)    162.6(7) 1_555 1_555 1_555 1_555 yes
   Ru(2)   Pd(1)   Ru(1)   C(10)   -161.7(7) 1_555 1_555 1_555 1_555 yes
   Ru(2)   Pd(1)   Ru(1)   C(11)   -144(1)  1_555 1_555 1_555 1_555 yes
   Ru(2)   Pd(1)   S(3)    C(1)    147.9(6) 1_555 1_555 1_555 1_555 yes
   Ru(2)   Pd(1)   P(1)    C(27)   49.9(5)  1_555 1_555 1_555 1_555 yes
   Ru(2)   Pd(1)   P(1)    C(33)   165.8(5) 1_555 1_555 1_555 1_555 yes
   Ru(2)   Pd(1)   P(1)    C(39)   -70.7(6) 1_555 1_555 1_555 1_555 yes
   Ru(2)   Pd(2)   Pd(1)   S(1)    -31.6(1) 1_555 1_555 1_555 1_555 yes
   Ru(2)   Pd(2)   Pd(1)   S(3)    135.8(1) 1_555 1_555 1_555 1_555 yes
   Ru(2)   Pd(2)   Pd(1)   P(1)    158.6(3) 1_555 1_555 1_555 1_555 yes
   Ru(2)   Pd(2)   Ru(1)   S(1)    45.2(1)  1_555 1_555 1_555 1_555 yes
   Ru(2)   Pd(2)   Ru(1)   S(2)    -67.1(1) 1_555 1_555 1_555 1_555 yes
   Ru(2)   Pd(2)   Ru(1)   C(7)    -121.1(10) 1_555 1_555 1_555 1_555 yes
   Ru(2)   Pd(2)   Ru(1)   C(8)    163(2)   1_555 1_555 1_555 1_555 yes
   Ru(2)   Pd(2)   Ru(1)   C(9)    149.4(7) 1_555 1_555 1_555 1_555 yes
   Ru(2)   Pd(2)   Ru(1)   C(10)   -179.2(9) 1_555 1_555 1_555 1_555 yes
   Ru(2)   Pd(2)   Ru(1)   C(11)   -142.3(10) 1_555 1_555 1_555 1_555 yes
   Ru(2)   Pd(2)   S(3)    C(1)    -152.1(6) 1_555 1_555 1_555 1_555 yes
   Ru(2)   Pd(2)   S(4)    C(4)    23.7(8)  1_555 1_555 1_555 1_555 yes
   Ru(2)   Ru(1)   Pd(1)   S(1)    -67.0(1) 1_555 1_555 1_555 1_555 yes
   Ru(2)   Ru(1)   Pd(1)   S(3)    86.3(1)  1_555 1_555 1_555 1_555 yes
   Ru(2)   Ru(1)   Pd(1)   P(1)    -128.9(2) 1_555 1_555 1_555 1_555 yes
   Ru(2)   Ru(1)   Pd(2)   S(2)    67.1(1)  1_555 1_555 1_555 1_555 yes
   Ru(2)   Ru(1)   Pd(2)   S(3)    -87.8(1) 1_555 1_555 1_555 1_555 yes
   Ru(2)   Ru(1)   Pd(2)   S(4)    139.5(1) 1_555 1_555 1_555 1_555 yes
   Ru(2)   Ru(1)   C(7)    C(8)    117(1)   1_555 1_555 1_555 1_555 yes
   Ru(2)   Ru(1)   C(7)    C(11)   -128(1)  1_555 1_555 1_555 1_555 yes
   Ru(2)   Ru(1)   C(7)    C(12)   -2(3)    1_555 1_555 1_555 1_555 yes
   Ru(2)   Ru(1)   C(8)    C(7)    -100(1)  1_555 1_555 1_555 1_555 yes
   Ru(2)   Ru(1)   C(8)    C(9)    139(1)   1_555 1_555 1_555 1_555 yes
   Ru(2)   Ru(1)   C(8)    C(13)   22(2)    1_555 1_555 1_555 1_555 yes
   Ru(2)   Ru(1)   C(9)    C(8)    -98(1)   1_555 1_555 1_555 1_555 yes
   Ru(2)   Ru(1)   C(9)    C(10)   148(1)   1_555 1_555 1_555 1_555 yes
   Ru(2)   Ru(1)   C(9)    C(14)   20(3)    1_555 1_555 1_555 1_555 yes
   Ru(2)   Ru(1)   C(10)   C(9)    -134(1)  1_555 1_555 1_555 1_555 yes
   Ru(2)   Ru(1)   C(10)   C(11)   104(2)   1_555 1_555 1_555 1_555 yes
   Ru(2)   Ru(1)   C(10)   C(15)   -21(4)   1_555 1_555 1_555 1_555 yes
   Ru(2)   Ru(1)   C(11)   C(7)    93(1)    1_555 1_555 1_555 1_555 yes
   Ru(2)   Ru(1)   C(11)   C(10)   -147(1)  1_555 1_555 1_555 1_555 yes
   Ru(2)   Ru(1)   C(11)   C(16)   -37(4)   1_555 1_555 1_555 1_555 yes
   Ru(2)   S(1)    Pd(1)   S(3)    16.6(3)  1_555 1_555 1_555 1_555 yes
   Ru(2)   S(1)    Pd(1)   P(1)    -147.8(1) 1_555 1_555 1_555 1_555 yes
   Ru(2)   S(1)    Ru(1)   S(2)    -3.0(1)  1_555 1_555 1_555 1_555 yes
   Ru(2)   S(1)    Ru(1)   C(7)    120.7(7) 1_555 1_555 1_555 1_555 yes
   Ru(2)   S(1)    Ru(1)   C(8)    147.7(7) 1_555 1_555 1_555 1_555 yes
   Ru(2)   S(1)    Ru(1)   C(9)    -173.7(6) 1_555 1_555 1_555 1_555 yes
   Ru(2)   S(1)    Ru(1)   C(10)   -157.8(8) 1_555 1_555 1_555 1_555 yes
   Ru(2)   S(1)    Ru(1)   C(11)   148(2)   1_555 1_555 1_555 1_555 yes
   Ru(2)   S(2)    Pd(2)   S(3)    -10.5(4) 1_555 1_555 1_555 1_555 yes
   Ru(2)   S(2)    Pd(2)   S(4)    159.1(1) 1_555 1_555 1_555 1_555 yes
   Ru(2)   S(2)    Ru(1)   S(1)    3.0(1)   1_555 1_555 1_555 1_555 yes
   Ru(2)   S(2)    Ru(1)   C(7)    -130.6(8) 1_555 1_555 1_555 1_555 yes
   Ru(2)   S(2)    Ru(1)   C(8)    -124.4(8) 1_555 1_555 1_555 1_555 yes
   Ru(2)   S(2)    Ru(1)   C(9)    164(1)   1_555 1_555 1_555 1_555 yes
   Ru(2)   S(2)    Ru(1)   C(10)   163.3(8) 1_555 1_555 1_555 1_555 yes
   Ru(2)   S(2)    Ru(1)   C(11)   -166.2(10) 1_555 1_555 1_555 1_555 yes
   Ru(2)   C(17)   C(18)   C(19)   61(1)    1_555 1_555 1_555 1_555 yes
   Ru(2)   C(17)   C(18)   C(23)   -124(1)  1_555 1_555 1_555 1_555 yes
   Ru(2)   C(17)   C(21)   C(20)   -63.8(10) 1_555 1_555 1_555 1_555 yes
   Ru(2)   C(17)   C(21)   C(26)   122(1)   1_555 1_555 1_555 1_555 yes
   Ru(2)   C(18)   C(17)   C(21)   -61(1)   1_555 1_555 1_555 1_555 yes
   Ru(2)   C(18)   C(17)   C(22)   123(1)   1_555 1_555 1_555 1_555 yes
   Ru(2)   C(18)   C(19)   C(20)   61.4(10) 1_555 1_555 1_555 1_555 yes
   Ru(2)   C(18)   C(19)   C(24)   -123(1)  1_555 1_555 1_555 1_555 yes
   Ru(2)   C(19)   C(18)   C(17)   -61(1)   1_555 1_555 1_555 1_555 yes
   Ru(2)   C(19)   C(18)   C(23)   124(1)   1_555 1_555 1_555 1_555 yes
   Ru(2)   C(19)   C(20)   C(21)   60(1)    1_555 1_555 1_555 1_555 yes
   Ru(2)   C(19)   C(20)   C(25)   -118(1)  1_555 1_555 1_555 1_555 yes
   Ru(2)   C(20)   C(19)   C(18)   -62.1(10) 1_555 1_555 1_555 1_555 yes
   Ru(2)   C(20)   C(19)   C(24)   123(1)   1_555 1_555 1_555 1_555 yes
   Ru(2)   C(20)   C(21)   C(17)   63.2(10) 1_555 1_555 1_555 1_555 yes
   Ru(2)   C(20)   C(21)   C(26)   -123(1)  1_555 1_555 1_555 1_555 yes
   Ru(2)   C(21)   C(17)   C(18)   62(1)    1_555 1_555 1_555 1_555 yes
   Ru(2)   C(21)   C(17)   C(22)   -122(1)  1_555 1_555 1_555 1_555 yes
   Ru(2)   C(21)   C(20)   C(19)   -61(1)   1_555 1_555 1_555 1_555 yes
   Ru(2)   C(21)   C(20)   C(25)   117(1)   1_555 1_555 1_555 1_555 yes
   S(1)    Pd(1)   Pd(2)   S(2)    -0.8(1)  1_555 1_555 1_555 1_555 yes
   S(1)    Pd(1)   Pd(2)   S(3)    -167.4(2) 1_555 1_555 1_555 1_555 yes
   S(1)    Pd(1)   Pd(2)   S(4)    149.8(3) 1_555 1_555 1_555 1_555 yes
   S(1)    Pd(1)   Ru(1)   S(2)    -111.6(2) 1_555 1_555 1_555 1_555 yes
   S(1)    Pd(1)   Ru(1)   C(7)    67(2)    1_555 1_555 1_555 1_555 yes
   S(1)    Pd(1)   Ru(1)   C(8)    63.6(6)  1_555 1_555 1_555 1_555 yes
   S(1)    Pd(1)   Ru(1)   C(9)    95.7(7)  1_555 1_555 1_555 1_555 yes
   S(1)    Pd(1)   Ru(1)   C(10)   131.3(7) 1_555 1_555 1_555 1_555 yes
   S(1)    Pd(1)   Ru(1)   C(11)   148(1)   1_555 1_555 1_555 1_555 yes
   S(1)    Pd(1)   Ru(2)   S(2)    107.3(2) 1_555 1_555 1_555 1_555 yes
   S(1)    Pd(1)   Ru(2)   C(17)   -148.5(5) 1_555 1_555 1_555 1_555 yes
   S(1)    Pd(1)   Ru(2)   C(18)   -123.7(4) 1_555 1_555 1_555 1_555 yes
   S(1)    Pd(1)   Ru(2)   C(19)   -85.8(4) 1_555 1_555 1_555 1_555 yes
   S(1)    Pd(1)   Ru(2)   C(20)   -63.3(6) 1_555 1_555 1_555 1_555 yes
   S(1)    Pd(1)   Ru(2)   C(21)   -112(1)  1_555 1_555 1_555 1_555 yes
   S(1)    Pd(1)   S(3)    C(1)    135.1(7) 1_555 1_555 1_555 1_555 yes
   S(1)    Pd(1)   P(1)    C(27)   91.1(5)  1_555 1_555 1_555 1_555 yes
   S(1)    Pd(1)   P(1)    C(33)   -152.9(5) 1_555 1_555 1_555 1_555 yes
   S(1)    Pd(1)   P(1)    C(39)   -29.5(6) 1_555 1_555 1_555 1_555 yes
   S(1)    Ru(1)   Pd(1)   S(3)    153.2(2) 1_555 1_555 1_555 1_555 yes
   S(1)    Ru(1)   Pd(1)   P(1)    -62.0(2) 1_555 1_555 1_555 1_555 yes
   S(1)    Ru(1)   Pd(2)   S(2)    112.4(2) 1_555 1_555 1_555 1_555 yes
   S(1)    Ru(1)   Pd(2)   S(3)    -42.5(2) 1_555 1_555 1_555 1_555 yes
   S(1)    Ru(1)   Pd(2)   S(4)    -175.2(2) 1_555 1_555 1_555 1_555 yes
   S(1)    Ru(1)   Ru(2)   S(2)    -176.6(2) 1_555 1_555 1_555 1_555 yes
   S(1)    Ru(1)   Ru(2)   C(17)   176.6(8) 1_555 1_555 1_555 1_555 yes
   S(1)    Ru(1)   Ru(2)   C(18)   -78(1)   1_555 1_555 1_555 1_555 yes
   S(1)    Ru(1)   Ru(2)   C(19)   17.2(7)  1_555 1_555 1_555 1_555 yes
   S(1)    Ru(1)   Ru(2)   C(20)   71.8(6)  1_555 1_555 1_555 1_555 yes
   S(1)    Ru(1)   Ru(2)   C(21)   121.8(6) 1_555 1_555 1_555 1_555 yes
   S(1)    Ru(1)   C(7)    C(8)    48(1)    1_555 1_555 1_555 1_555 yes
   S(1)    Ru(1)   C(7)    C(11)   162(1)   1_555 1_555 1_555 1_555 yes
   S(1)    Ru(1)   C(7)    C(12)   -72(3)   1_555 1_555 1_555 1_555 yes
   S(1)    Ru(1)   C(8)    C(7)    -140(1)  1_555 1_555 1_555 1_555 yes
   S(1)    Ru(1)   C(8)    C(9)    98(1)    1_555 1_555 1_555 1_555 yes
   S(1)    Ru(1)   C(8)    C(13)   -17(2)   1_555 1_555 1_555 1_555 yes
   S(1)    Ru(1)   C(9)    C(8)    -86(1)   1_555 1_555 1_555 1_555 yes
   S(1)    Ru(1)   C(9)    C(10)   160(1)   1_555 1_555 1_555 1_555 yes
   S(1)    Ru(1)   C(9)    C(14)   31(2)    1_555 1_555 1_555 1_555 yes
   S(1)    Ru(1)   C(10)   C(9)    -27(1)   1_555 1_555 1_555 1_555 yes
   S(1)    Ru(1)   C(10)   C(11)   -147(1)  1_555 1_555 1_555 1_555 yes
   S(1)    Ru(1)   C(10)   C(15)   86(2)    1_555 1_555 1_555 1_555 yes
   S(1)    Ru(1)   C(11)   C(7)    -40(3)   1_555 1_555 1_555 1_555 yes
   S(1)    Ru(1)   C(11)   C(10)   78(3)    1_555 1_555 1_555 1_555 yes
   S(1)    Ru(1)   C(11)   C(16)   -171(2)  1_555 1_555 1_555 1_555 yes
   S(1)    Ru(2)   Pd(1)   S(3)    -171.4(2) 1_555 1_555 1_555 1_555 yes
   S(1)    Ru(2)   Pd(1)   P(1)    56.8(2)  1_555 1_555 1_555 1_555 yes
   S(1)    Ru(2)   Pd(2)   S(2)    -108.6(2) 1_555 1_555 1_555 1_555 yes
   S(1)    Ru(2)   Pd(2)   S(3)    66.7(2)  1_555 1_555 1_555 1_555 yes
   S(1)    Ru(2)   Pd(2)   S(4)    -149.7(3) 1_555 1_555 1_555 1_555 yes
   S(1)    Ru(2)   Ru(1)   S(2)    176.6(2) 1_555 1_555 1_555 1_555 yes
   S(1)    Ru(2)   Ru(1)   C(7)    -105(1)  1_555 1_555 1_555 1_555 yes
   S(1)    Ru(2)   Ru(1)   C(8)    -52(1)   1_555 1_555 1_555 1_555 yes
   S(1)    Ru(2)   Ru(1)   C(9)    14(1)    1_555 1_555 1_555 1_555 yes
   S(1)    Ru(2)   Ru(1)   C(10)   121(2)   1_555 1_555 1_555 1_555 yes
   S(1)    Ru(2)   Ru(1)   C(11)   -159(1)  1_555 1_555 1_555 1_555 yes
   S(1)    Ru(2)   C(17)   C(18)   -30(1)   1_555 1_555 1_555 1_555 yes
   S(1)    Ru(2)   C(17)   C(21)   88(1)    1_555 1_555 1_555 1_555 yes
   S(1)    Ru(2)   C(17)   C(22)   -151(1)  1_555 1_555 1_555 1_555 yes
   S(1)    Ru(2)   C(18)   C(17)   165.6(7) 1_555 1_555 1_555 1_555 yes
   S(1)    Ru(2)   C(18)   C(19)   46.4(10) 1_555 1_555 1_555 1_555 yes
   S(1)    Ru(2)   C(18)   C(23)   -74(1)   1_555 1_555 1_555 1_555 yes
   S(1)    Ru(2)   C(19)   C(18)   -141.8(9) 1_555 1_555 1_555 1_555 yes
   S(1)    Ru(2)   C(19)   C(20)   103.3(9) 1_555 1_555 1_555 1_555 yes
   S(1)    Ru(2)   C(19)   C(24)   -17(1)   1_555 1_555 1_555 1_555 yes
   S(1)    Ru(2)   C(20)   C(19)   -81.5(9) 1_555 1_555 1_555 1_555 yes
   S(1)    Ru(2)   C(20)   C(21)   158.3(9) 1_555 1_555 1_555 1_555 yes
   S(1)    Ru(2)   C(20)   C(25)   38(1)    1_555 1_555 1_555 1_555 yes
   S(1)    Ru(2)   C(21)   C(17)   -144.4(7) 1_555 1_555 1_555 1_555 yes
   S(1)    Ru(2)   C(21)   C(20)   -30(1)   1_555 1_555 1_555 1_555 yes
   S(1)    Ru(2)   C(21)   C(26)   94(1)    1_555 1_555 1_555 1_555 yes
   S(2)    Pd(2)   Pd(1)   S(3)    166.6(2) 1_555 1_555 1_555 1_555 yes
   S(2)    Pd(2)   Pd(1)   P(1)    -170.6(3) 1_555 1_555 1_555 1_555 yes
   S(2)    Pd(2)   Ru(1)   C(7)    -53.9(10) 1_555 1_555 1_555 1_555 yes
   S(2)    Pd(2)   Ru(1)   C(8)    -129(2)  1_555 1_555 1_555 1_555 yes
   S(2)    Pd(2)   Ru(1)   C(9)    -143.5(7) 1_555 1_555 1_555 1_555 yes
   S(2)    Pd(2)   Ru(1)   C(10)   -112.1(9) 1_555 1_555 1_555 1_555 yes
   S(2)    Pd(2)   Ru(1)   C(11)   -75.2(10) 1_555 1_555 1_555 1_555 yes
   S(2)    Pd(2)   Ru(2)   C(17)   89.9(4)  1_555 1_555 1_555 1_555 yes
   S(2)    Pd(2)   Ru(2)   C(18)   126.7(5) 1_555 1_555 1_555 1_555 yes
   S(2)    Pd(2)   Ru(2)   C(19)   149.1(6) 1_555 1_555 1_555 1_555 yes
   S(2)    Pd(2)   Ru(2)   C(20)   90(1)    1_555 1_555 1_555 1_555 yes
   S(2)    Pd(2)   Ru(2)   C(21)   60.7(5)  1_555 1_555 1_555 1_555 yes
   S(2)    Pd(2)   S(3)    C(1)    -143.7(6) 1_555 1_555 1_555 1_555 yes
   S(2)    Pd(2)   S(4)    C(4)    -7.9(7)  1_555 1_555 1_555 1_555 yes
   S(2)    Ru(1)   Pd(1)   S(3)    41.6(2)  1_555 1_555 1_555 1_555 yes
   S(2)    Ru(1)   Pd(1)   P(1)    -173.5(2) 1_555 1_555 1_555 1_555 yes
   S(2)    Ru(1)   Pd(2)   S(3)    -154.9(2) 1_555 1_555 1_555 1_555 yes
   S(2)    Ru(1)   Pd(2)   S(4)    72.4(2)  1_555 1_555 1_555 1_555 yes
   S(2)    Ru(1)   Ru(2)   C(17)   -6.9(8)  1_555 1_555 1_555 1_555 yes
   S(2)    Ru(1)   Ru(2)   C(18)   98(1)    1_555 1_555 1_555 1_555 yes
   S(2)    Ru(1)   Ru(2)   C(19)   -166.3(7) 1_555 1_555 1_555 1_555 yes
   S(2)    Ru(1)   Ru(2)   C(20)   -111.6(6) 1_555 1_555 1_555 1_555 yes
   S(2)    Ru(1)   Ru(2)   C(21)   -61.6(6) 1_555 1_555 1_555 1_555 yes
   S(2)    Ru(1)   C(7)    C(8)    173(1)   1_555 1_555 1_555 1_555 yes
   S(2)    Ru(1)   C(7)    C(11)   -72(1)   1_555 1_555 1_555 1_555 yes
   S(2)    Ru(1)   C(7)    C(12)   53(3)    1_555 1_555 1_555 1_555 yes
   S(2)    Ru(1)   C(8)    C(7)    -9(1)    1_555 1_555 1_555 1_555 yes
   S(2)    Ru(1)   C(8)    C(9)    -130(1)  1_555 1_555 1_555 1_555 yes
   S(2)    Ru(1)   C(8)    C(13)   112(2)   1_555 1_555 1_555 1_555 yes
   S(2)    Ru(1)   C(9)    C(8)    111(1)   1_555 1_555 1_555 1_555 yes
   S(2)    Ru(1)   C(9)    C(10)   -2(2)    1_555 1_555 1_555 1_555 yes
   S(2)    Ru(1)   C(9)    C(14)   -130(2)  1_555 1_555 1_555 1_555 yes
   S(2)    Ru(1)   C(10)   C(9)    178(1)   1_555 1_555 1_555 1_555 yes
   S(2)    Ru(1)   C(10)   C(11)   58(1)    1_555 1_555 1_555 1_555 yes
   S(2)    Ru(1)   C(10)   C(15)   -67(2)   1_555 1_555 1_555 1_555 yes
   S(2)    Ru(1)   C(11)   C(7)    112(1)   1_555 1_555 1_555 1_555 yes
   S(2)    Ru(1)   C(11)   C(10)   -128(1)  1_555 1_555 1_555 1_555 yes
   S(2)    Ru(1)   C(11)   C(16)   -17(3)   1_555 1_555 1_555 1_555 yes
   S(2)    Ru(2)   Pd(1)   S(3)    -64.2(2) 1_555 1_555 1_555 1_555 yes
   S(2)    Ru(2)   Pd(1)   P(1)    164.1(2) 1_555 1_555 1_555 1_555 yes
   S(2)    Ru(2)   Pd(2)   S(3)    175.3(2) 1_555 1_555 1_555 1_555 yes
   S(2)    Ru(2)   Pd(2)   S(4)    -41.1(3) 1_555 1_555 1_555 1_555 yes
   S(2)    Ru(2)   Ru(1)   C(7)    78(1)    1_555 1_555 1_555 1_555 yes
   S(2)    Ru(2)   Ru(1)   C(8)    131(1)   1_555 1_555 1_555 1_555 yes
   S(2)    Ru(2)   Ru(1)   C(9)    -162(1)  1_555 1_555 1_555 1_555 yes
   S(2)    Ru(2)   Ru(1)   C(10)   -54(2)   1_555 1_555 1_555 1_555 yes
   S(2)    Ru(2)   Ru(1)   C(11)   24(1)    1_555 1_555 1_555 1_555 yes
   S(2)    Ru(2)   C(17)   C(18)   150.3(8) 1_555 1_555 1_555 1_555 yes
   S(2)    Ru(2)   C(17)   C(21)   -90.6(9) 1_555 1_555 1_555 1_555 yes
   S(2)    Ru(2)   C(17)   C(22)   29(1)    1_555 1_555 1_555 1_555 yes
   S(2)    Ru(2)   C(18)   C(17)   -37.6(10) 1_555 1_555 1_555 1_555 yes
   S(2)    Ru(2)   C(18)   C(19)   -156.8(8) 1_555 1_555 1_555 1_555 yes
   S(2)    Ru(2)   C(18)   C(23)   82(1)    1_555 1_555 1_555 1_555 yes
   S(2)    Ru(2)   C(19)   C(18)   53(1)    1_555 1_555 1_555 1_555 yes
   S(2)    Ru(2)   C(19)   C(20)   -61(1)   1_555 1_555 1_555 1_555 yes
   S(2)    Ru(2)   C(19)   C(24)   178.0(10) 1_555 1_555 1_555 1_555 yes
   S(2)    Ru(2)   C(20)   C(19)   154.3(8) 1_555 1_555 1_555 1_555 yes
   S(2)    Ru(2)   C(20)   C(21)   34(1)    1_555 1_555 1_555 1_555 yes
   S(2)    Ru(2)   C(20)   C(25)   -85(1)   1_555 1_555 1_555 1_555 yes
   S(2)    Ru(2)   C(21)   C(17)   92.9(9)  1_555 1_555 1_555 1_555 yes
   S(2)    Ru(2)   C(21)   C(20)   -153.4(9) 1_555 1_555 1_555 1_555 yes
   S(2)    Ru(2)   C(21)   C(26)   -28(1)   1_555 1_555 1_555 1_555 yes
   S(3)    Pd(1)   Pd(2)   S(4)    -42.8(3) 1_555 1_555 1_555 1_555 yes
   S(3)    Pd(1)   Ru(1)   C(7)    -139(2)  1_555 1_555 1_555 1_555 yes
   S(3)    Pd(1)   Ru(1)   C(8)    -143.2(6) 1_555 1_555 1_555 1_555 yes
   S(3)    Pd(1)   Ru(1)   C(9)    -111.1(7) 1_555 1_555 1_555 1_555 yes
   S(3)    Pd(1)   Ru(1)   C(10)   -75.5(7) 1_555 1_555 1_555 1_555 yes
   S(3)    Pd(1)   Ru(1)   C(11)   -58(1)   1_555 1_555 1_555 1_555 yes
   S(3)    Pd(1)   Ru(2)   C(17)   40.1(5)  1_555 1_555 1_555 1_555 yes
   S(3)    Pd(1)   Ru(2)   C(18)   64.9(4)  1_555 1_555 1_555 1_555 yes
   S(3)    Pd(1)   Ru(2)   C(19)   102.8(4) 1_555 1_555 1_555 1_555 yes
   S(3)    Pd(1)   Ru(2)   C(20)   125.3(6) 1_555 1_555 1_555 1_555 yes
   S(3)    Pd(1)   Ru(2)   C(21)   76(1)    1_555 1_555 1_555 1_555 yes
   S(3)    Pd(1)   P(1)    C(27)   -80.7(5) 1_555 1_555 1_555 1_555 yes
   S(3)    Pd(1)   P(1)    C(33)   35.2(5)  1_555 1_555 1_555 1_555 yes
   S(3)    Pd(1)   P(1)    C(39)   158.7(6) 1_555 1_555 1_555 1_555 yes
   S(3)    Pd(2)   Pd(1)   P(1)    22.8(3)  1_555 1_555 1_555 1_555 yes
   S(3)    Pd(2)   Ru(1)   C(7)    151.2(10) 1_555 1_555 1_555 1_555 yes
   S(3)    Pd(2)   Ru(1)   C(8)    75(2)    1_555 1_555 1_555 1_555 yes
   S(3)    Pd(2)   Ru(1)   C(9)    61.7(7)  1_555 1_555 1_555 1_555 yes
   S(3)    Pd(2)   Ru(1)   C(10)   93.0(9)  1_555 1_555 1_555 1_555 yes
   S(3)    Pd(2)   Ru(1)   C(11)   129.9(10) 1_555 1_555 1_555 1_555 yes
   S(3)    Pd(2)   Ru(2)   C(17)   -94.8(4) 1_555 1_555 1_555 1_555 yes
   S(3)    Pd(2)   Ru(2)   C(18)   -58.0(5) 1_555 1_555 1_555 1_555 yes
   S(3)    Pd(2)   Ru(2)   C(19)   -35.6(6) 1_555 1_555 1_555 1_555 yes
   S(3)    Pd(2)   Ru(2)   C(20)   -94(1)   1_555 1_555 1_555 1_555 yes
   S(3)    Pd(2)   Ru(2)   C(21)   -124.0(5) 1_555 1_555 1_555 1_555 yes
   S(3)    Pd(2)   S(4)    C(4)    167.4(7) 1_555 1_555 1_555 1_555 yes
   S(4)    Pd(2)   Pd(1)   P(1)    -20.0(4) 1_555 1_555 1_555 1_555 yes
   S(4)    Pd(2)   Ru(1)   C(7)    18.5(10) 1_555 1_555 1_555 1_555 yes
   S(4)    Pd(2)   Ru(1)   C(8)    -57(2)   1_555 1_555 1_555 1_555 yes
   S(4)    Pd(2)   Ru(1)   C(9)    -71.0(7) 1_555 1_555 1_555 1_555 yes
   S(4)    Pd(2)   Ru(1)   C(10)   -39.7(9) 1_555 1_555 1_555 1_555 yes
   S(4)    Pd(2)   Ru(1)   C(11)   -2(1)    1_555 1_555 1_555 1_555 yes
   S(4)    Pd(2)   Ru(2)   C(17)   48.8(5)  1_555 1_555 1_555 1_555 yes
   S(4)    Pd(2)   Ru(2)   C(18)   85.6(5)  1_555 1_555 1_555 1_555 yes
   S(4)    Pd(2)   Ru(2)   C(19)   108.1(6) 1_555 1_555 1_555 1_555 yes
   S(4)    Pd(2)   Ru(2)   C(20)   49(1)    1_555 1_555 1_555 1_555 yes
   S(4)    Pd(2)   Ru(2)   C(21)   19.6(6)  1_555 1_555 1_555 1_555 yes
   S(4)    Pd(2)   S(3)    C(1)    46.7(6)  1_555 1_555 1_555 1_555 yes
   P(1)    Pd(1)   Ru(1)   C(7)    5(2)     1_555 1_555 1_555 1_555 yes
   P(1)    Pd(1)   Ru(1)   C(8)    1.6(6)   1_555 1_555 1_555 1_555 yes
   P(1)    Pd(1)   Ru(1)   C(9)    33.7(8)  1_555 1_555 1_555 1_555 yes
   P(1)    Pd(1)   Ru(1)   C(10)   69.3(7)  1_555 1_555 1_555 1_555 yes
   P(1)    Pd(1)   Ru(1)   C(11)   86(1)    1_555 1_555 1_555 1_555 yes
   P(1)    Pd(1)   Ru(2)   C(17)   -91.6(5) 1_555 1_555 1_555 1_555 yes
   P(1)    Pd(1)   Ru(2)   C(18)   -66.9(4) 1_555 1_555 1_555 1_555 yes
   P(1)    Pd(1)   Ru(2)   C(19)   -28.9(4) 1_555 1_555 1_555 1_555 yes
   P(1)    Pd(1)   Ru(2)   C(20)   -6.5(6)  1_555 1_555 1_555 1_555 yes
   P(1)    Pd(1)   Ru(2)   C(21)   -55(1)   1_555 1_555 1_555 1_555 yes
   P(1)    Pd(1)   S(3)    C(1)    -60.4(6) 1_555 1_555 1_555 1_555 yes
   P(1)    C(27)   C(28)   C(29)   179(1)   1_555 1_555 1_555 1_555 yes
   P(1)    C(27)   C(32)   C(31)   -179(1)  1_555 1_555 1_555 1_555 yes
   P(1)    C(33)   C(34)   C(35)   177(1)   1_555 1_555 1_555 1_555 yes
   P(1)    C(33)   C(38)   C(37)   -178(1)  1_555 1_555 1_555 1_555 yes
   P(1)    C(39)   C(40)   C(41)   -176(1)  1_555 1_555 1_555 1_555 yes
   P(1)    C(39)   C(44)   C(43)   179(1)   1_555 1_555 1_555 1_555 yes
   C(7)    Ru(1)   Ru(2)   C(17)   71(1)    1_555 1_555 1_555 1_555 yes
   C(7)    Ru(1)   Ru(2)   C(18)   176(2)   1_555 1_555 1_555 1_555 yes
   C(7)    Ru(1)   Ru(2)   C(19)   -87(1)   1_555 1_555 1_555 1_555 yes
   C(7)    Ru(1)   Ru(2)   C(20)   -33(1)   1_555 1_555 1_555 1_555 yes
   C(7)    Ru(1)   Ru(2)   C(21)   16(1)    1_555 1_555 1_555 1_555 yes
   C(7)    Ru(1)   C(8)    C(9)    -120(1)  1_555 1_555 1_555 1_555 yes
   C(7)    Ru(1)   C(8)    C(13)   122(3)   1_555 1_555 1_555 1_555 yes
   C(7)    Ru(1)   C(9)    C(8)    35(1)    1_555 1_555 1_555 1_555 yes
   C(7)    Ru(1)   C(9)    C(10)   -77(1)   1_555 1_555 1_555 1_555 yes
   C(7)    Ru(1)   C(9)    C(14)   153(2)   1_555 1_555 1_555 1_555 yes
   C(7)    Ru(1)   C(10)   C(9)    83(1)    1_555 1_555 1_555 1_555 yes
   C(7)    Ru(1)   C(10)   C(11)   -37(1)   1_555 1_555 1_555 1_555 yes
   C(7)    Ru(1)   C(10)   C(15)   -163(3)  1_555 1_555 1_555 1_555 yes
   C(7)    Ru(1)   C(11)   C(10)   118(2)   1_555 1_555 1_555 1_555 yes
   C(7)    Ru(1)   C(11)   C(16)   -130(4)  1_555 1_555 1_555 1_555 yes
   C(7)    C(8)    Ru(1)   C(9)    120(1)   1_555 1_555 1_555 1_555 yes
   C(7)    C(8)    Ru(1)   C(10)   81(1)    1_555 1_555 1_555 1_555 yes
   C(7)    C(8)    Ru(1)   C(11)   39(1)    1_555 1_555 1_555 1_555 yes
   C(7)    C(8)    C(9)    C(10)   4(2)     1_555 1_555 1_555 1_555 yes
   C(7)    C(8)    C(9)    C(14)   179(1)   1_555 1_555 1_555 1_555 yes
   C(7)    C(11)   Ru(1)   C(8)    -39(1)   1_555 1_555 1_555 1_555 yes
   C(7)    C(11)   Ru(1)   C(9)    -83(1)   1_555 1_555 1_555 1_555 yes
   C(7)    C(11)   Ru(1)   C(10)   -118(2)  1_555 1_555 1_555 1_555 yes
   C(7)    C(11)   C(10)   C(9)    1(2)     1_555 1_555 1_555 1_555 yes
   C(7)    C(11)   C(10)   C(15)   179(1)   1_555 1_555 1_555 1_555 yes
   C(8)    Ru(1)   Ru(2)   C(17)   124(1)   1_555 1_555 1_555 1_555 yes
   C(8)    Ru(1)   Ru(2)   C(18)   -130(2)  1_555 1_555 1_555 1_555 yes
   C(8)    Ru(1)   Ru(2)   C(19)   -35(1)   1_555 1_555 1_555 1_555 yes
   C(8)    Ru(1)   Ru(2)   C(20)   19(1)    1_555 1_555 1_555 1_555 yes
   C(8)    Ru(1)   Ru(2)   C(21)   69(1)    1_555 1_555 1_555 1_555 yes
   C(8)    Ru(1)   C(7)    C(11)   113(2)   1_555 1_555 1_555 1_555 yes
   C(8)    Ru(1)   C(7)    C(12)   -120(3)  1_555 1_555 1_555 1_555 yes
   C(8)    Ru(1)   C(9)    C(10)   -113(1)  1_555 1_555 1_555 1_555 yes
   C(8)    Ru(1)   C(9)    C(14)   118(3)   1_555 1_555 1_555 1_555 yes
   C(8)    Ru(1)   C(10)   C(9)    40(1)    1_555 1_555 1_555 1_555 yes
   C(8)    Ru(1)   C(10)   C(11)   -79(1)   1_555 1_555 1_555 1_555 yes
   C(8)    Ru(1)   C(10)   C(15)   154(3)   1_555 1_555 1_555 1_555 yes
   C(8)    Ru(1)   C(11)   C(10)   79(1)    1_555 1_555 1_555 1_555 yes
   C(8)    Ru(1)   C(11)   C(16)   -170(4)  1_555 1_555 1_555 1_555 yes
   C(8)    C(7)    Ru(1)   C(9)    -36(1)   1_555 1_555 1_555 1_555 yes
   C(8)    C(7)    Ru(1)   C(10)   -77(1)   1_555 1_555 1_555 1_555 yes
   C(8)    C(7)    Ru(1)   C(11)   -113(2)  1_555 1_555 1_555 1_555 yes
   C(8)    C(7)    C(11)   C(10)   1(2)     1_555 1_555 1_555 1_555 yes
   C(8)    C(7)    C(11)   C(16)   -175(2)  1_555 1_555 1_555 1_555 yes
   C(8)    C(9)    Ru(1)   C(10)   113(1)   1_555 1_555 1_555 1_555 yes
   C(8)    C(9)    Ru(1)   C(11)   77(1)    1_555 1_555 1_555 1_555 yes
   C(8)    C(9)    C(10)   C(11)   -3(2)    1_555 1_555 1_555 1_555 yes
   C(8)    C(9)    C(10)   C(15)   178(1)   1_555 1_555 1_555 1_555 yes
   C(9)    Ru(1)   Ru(2)   C(17)   -169(1)  1_555 1_555 1_555 1_555 yes
   C(9)    Ru(1)   Ru(2)   C(18)   -64(2)   1_555 1_555 1_555 1_555 yes
   C(9)    Ru(1)   Ru(2)   C(19)   31(1)    1_555 1_555 1_555 1_555 yes
   C(9)    Ru(1)   Ru(2)   C(20)   85(1)    1_555 1_555 1_555 1_555 yes
   C(9)    Ru(1)   Ru(2)   C(21)   135(1)   1_555 1_555 1_555 1_555 yes
   C(9)    Ru(1)   C(7)    C(11)   77(1)    1_555 1_555 1_555 1_555 yes
   C(9)    Ru(1)   C(7)    C(12)   -157(3)  1_555 1_555 1_555 1_555 yes
   C(9)    Ru(1)   C(8)    C(13)   -116(3)  1_555 1_555 1_555 1_555 yes
   C(9)    Ru(1)   C(10)   C(11)   -120(2)  1_555 1_555 1_555 1_555 yes
   C(9)    Ru(1)   C(10)   C(15)   113(3)   1_555 1_555 1_555 1_555 yes
   C(9)    Ru(1)   C(11)   C(10)   35(1)    1_555 1_555 1_555 1_555 yes
   C(9)    Ru(1)   C(11)   C(16)   145(4)   1_555 1_555 1_555 1_555 yes
   C(9)    C(8)    Ru(1)   C(10)   -38(1)   1_555 1_555 1_555 1_555 yes
   C(9)    C(8)    Ru(1)   C(11)   -80(1)   1_555 1_555 1_555 1_555 yes
   C(9)    C(8)    C(7)    C(11)   -3(2)    1_555 1_555 1_555 1_555 yes
   C(9)    C(8)    C(7)    C(12)   -178(1)  1_555 1_555 1_555 1_555 yes
   C(9)    C(10)   Ru(1)   C(11)   120(2)   1_555 1_555 1_555 1_555 yes
   C(9)    C(10)   C(11)   C(16)   179(1)   1_555 1_555 1_555 1_555 yes
   C(10)   Ru(1)   Ru(2)   C(17)   -61(2)   1_555 1_555 1_555 1_555 yes
   C(10)   Ru(1)   Ru(2)   C(18)   43(3)    1_555 1_555 1_555 1_555 yes
   C(10)   Ru(1)   Ru(2)   C(19)   139(2)   1_555 1_555 1_555 1_555 yes
   C(10)   Ru(1)   Ru(2)   C(20)   -166(2)  1_555 1_555 1_555 1_555 yes
   C(10)   Ru(1)   Ru(2)   C(21)   -116(2)  1_555 1_555 1_555 1_555 yes
   C(10)   Ru(1)   C(7)    C(11)   36(1)    1_555 1_555 1_555 1_555 yes
   C(10)   Ru(1)   C(7)    C(12)   162(3)   1_555 1_555 1_555 1_555 yes
   C(10)   Ru(1)   C(8)    C(13)   -155(2)  1_555 1_555 1_555 1_555 yes
   C(10)   Ru(1)   C(9)    C(14)   -128(3)  1_555 1_555 1_555 1_555 yes
   C(10)   Ru(1)   C(11)   C(16)   110(4)   1_555 1_555 1_555 1_555 yes
   C(10)   C(9)    Ru(1)   C(11)   -35(1)   1_555 1_555 1_555 1_555 yes
   C(10)   C(9)    C(8)    C(13)   -174(1)  1_555 1_555 1_555 1_555 yes
   C(10)   C(11)   C(7)    C(12)   176(2)   1_555 1_555 1_555 1_555 yes
   C(11)   Ru(1)   Ru(2)   C(17)   17(1)    1_555 1_555 1_555 1_555 yes
   C(11)   Ru(1)   Ru(2)   C(18)   122(2)   1_555 1_555 1_555 1_555 yes
   C(11)   Ru(1)   Ru(2)   C(19)   -142(1)  1_555 1_555 1_555 1_555 yes
   C(11)   Ru(1)   Ru(2)   C(20)   -87(1)   1_555 1_555 1_555 1_555 yes
   C(11)   Ru(1)   Ru(2)   C(21)   -37(1)   1_555 1_555 1_555 1_555 yes
   C(11)   Ru(1)   C(7)    C(12)   125(4)   1_555 1_555 1_555 1_555 yes
   C(11)   Ru(1)   C(8)    C(13)   162(3)   1_555 1_555 1_555 1_555 yes
   C(11)   Ru(1)   C(9)    C(14)   -164(3)  1_555 1_555 1_555 1_555 yes
   C(11)   Ru(1)   C(10)   C(15)   -126(3)  1_555 1_555 1_555 1_555 yes
   C(11)   C(7)    C(8)    C(13)   175(1)   1_555 1_555 1_555 1_555 yes
   C(11)   C(10)   C(9)    C(14)   -177(1)  1_555 1_555 1_555 1_555 yes
   C(12)   C(7)    C(8)    C(13)   0(3)     1_555 1_555 1_555 1_555 yes
   C(12)   C(7)    C(11)   C(16)   -1(4)    1_555 1_555 1_555 1_555 yes
   C(13)   C(8)    C(9)    C(14)   0(2)     1_555 1_555 1_555 1_555 yes
   C(14)   C(9)    C(10)   C(15)   3(3)     1_555 1_555 1_555 1_555 yes
   C(15)   C(10)   C(11)   C(16)   -2(3)    1_555 1_555 1_555 1_555 yes
   C(17)   Ru(2)   C(18)   C(19)   -119(1)  1_555 1_555 1_555 1_555 yes
   C(17)   Ru(2)   C(18)   C(23)   120(1)   1_555 1_555 1_555 1_555 yes
   C(17)   Ru(2)   C(19)   C(18)   35.8(8)  1_555 1_555 1_555 1_555 yes
   C(17)   Ru(2)   C(19)   C(20)   -79.1(10) 1_555 1_555 1_555 1_555 yes
   C(17)   Ru(2)   C(19)   C(24)   160(1)   1_555 1_555 1_555 1_555 yes
   C(17)   Ru(2)   C(20)   C(19)   79.9(10) 1_555 1_555 1_555 1_555 yes
   C(17)   Ru(2)   C(20)   C(21)   -40.3(9) 1_555 1_555 1_555 1_555 yes
   C(17)   Ru(2)   C(20)   C(25)   -160(1)  1_555 1_555 1_555 1_555 yes
   C(17)   Ru(2)   C(21)   C(20)   113(1)   1_555 1_555 1_555 1_555 yes
   C(17)   Ru(2)   C(21)   C(26)   -121(1)  1_555 1_555 1_555 1_555 yes
   C(17)   C(18)   Ru(2)   C(19)   119(1)   1_555 1_555 1_555 1_555 yes
   C(17)   C(18)   Ru(2)   C(20)   79.9(9)  1_555 1_555 1_555 1_555 yes
   C(17)   C(18)   Ru(2)   C(21)   37.6(8)  1_555 1_555 1_555 1_555 yes
   C(17)   C(18)   C(19)   C(20)   0(1)     1_555 1_555 1_555 1_555 yes
   C(17)   C(18)   C(19)   C(24)   175(1)   1_555 1_555 1_555 1_555 yes
   C(17)   C(21)   Ru(2)   C(18)   -35.4(8) 1_555 1_555 1_555 1_555 yes
   C(17)   C(21)   Ru(2)   C(19)   -77.3(9) 1_555 1_555 1_555 1_555 yes
   C(17)   C(21)   Ru(2)   C(20)   -113(1)  1_555 1_555 1_555 1_555 yes
   C(17)   C(21)   C(20)   C(19)   1(1)     1_555 1_555 1_555 1_555 yes
   C(17)   C(21)   C(20)   C(25)   -178(1)  1_555 1_555 1_555 1_555 yes
   C(18)   Ru(2)   C(17)   C(21)   119(1)   1_555 1_555 1_555 1_555 yes
   C(18)   Ru(2)   C(17)   C(22)   -120(1)  1_555 1_555 1_555 1_555 yes
   C(18)   Ru(2)   C(19)   C(20)   -114(1)  1_555 1_555 1_555 1_555 yes
   C(18)   Ru(2)   C(19)   C(24)   124(1)   1_555 1_555 1_555 1_555 yes
   C(18)   Ru(2)   C(20)   C(19)   38.5(9)  1_555 1_555 1_555 1_555 yes
   C(18)   Ru(2)   C(20)   C(21)   -81.7(10) 1_555 1_555 1_555 1_555 yes
   C(18)   Ru(2)   C(20)   C(25)   158(1)   1_555 1_555 1_555 1_555 yes
   C(18)   Ru(2)   C(21)   C(20)   78.3(10) 1_555 1_555 1_555 1_555 yes
   C(18)   Ru(2)   C(21)   C(26)   -156(1)  1_555 1_555 1_555 1_555 yes
   C(18)   C(17)   Ru(2)   C(19)   -36.8(8) 1_555 1_555 1_555 1_555 yes
   C(18)   C(17)   Ru(2)   C(20)   -80.1(9) 1_555 1_555 1_555 1_555 yes
   C(18)   C(17)   Ru(2)   C(21)   -119(1)  1_555 1_555 1_555 1_555 yes
   C(18)   C(17)   C(21)   C(20)   -1(1)    1_555 1_555 1_555 1_555 yes
   C(18)   C(17)   C(21)   C(26)   -174(1)  1_555 1_555 1_555 1_555 yes
   C(18)   C(19)   Ru(2)   C(20)   114(1)   1_555 1_555 1_555 1_555 yes
   C(18)   C(19)   Ru(2)   C(21)   79.2(10) 1_555 1_555 1_555 1_555 yes
   C(18)   C(19)   C(20)   C(21)   -1(1)    1_555 1_555 1_555 1_555 yes
   C(18)   C(19)   C(20)   C(25)   179(1)   1_555 1_555 1_555 1_555 yes
   C(19)   Ru(2)   C(17)   C(21)   82.4(10) 1_555 1_555 1_555 1_555 yes
   C(19)   Ru(2)   C(17)   C(22)   -157(1)  1_555 1_555 1_555 1_555 yes
   C(19)   Ru(2)   C(18)   C(23)   -120(1)  1_555 1_555 1_555 1_555 yes
   C(19)   Ru(2)   C(20)   C(21)   -120(1)  1_555 1_555 1_555 1_555 yes
   C(19)   Ru(2)   C(20)   C(25)   119(1)   1_555 1_555 1_555 1_555 yes
   C(19)   Ru(2)   C(21)   C(20)   36.4(9)  1_555 1_555 1_555 1_555 yes
   C(19)   Ru(2)   C(21)   C(26)   161(1)   1_555 1_555 1_555 1_555 yes
   C(19)   C(18)   Ru(2)   C(20)   -39.3(9) 1_555 1_555 1_555 1_555 yes
   C(19)   C(18)   Ru(2)   C(21)   -81.6(10) 1_555 1_555 1_555 1_555 yes
   C(19)   C(18)   C(17)   C(21)   0(1)     1_555 1_555 1_555 1_555 yes
   C(19)   C(18)   C(17)   C(22)   -174(1)  1_555 1_555 1_555 1_555 yes
   C(19)   C(20)   Ru(2)   C(21)   120(1)   1_555 1_555 1_555 1_555 yes
   C(19)   C(20)   C(21)   C(26)   175(1)   1_555 1_555 1_555 1_555 yes
   C(20)   Ru(2)   C(17)   C(21)   39.0(9)  1_555 1_555 1_555 1_555 yes
   C(20)   Ru(2)   C(17)   C(22)   159(1)   1_555 1_555 1_555 1_555 yes
   C(20)   Ru(2)   C(18)   C(23)   -159(1)  1_555 1_555 1_555 1_555 yes
   C(20)   Ru(2)   C(19)   C(24)   -120(1)  1_555 1_555 1_555 1_555 yes
   C(20)   Ru(2)   C(21)   C(26)   125(1)   1_555 1_555 1_555 1_555 yes
   C(20)   C(19)   Ru(2)   C(21)   -35.7(9) 1_555 1_555 1_555 1_555 yes
   C(20)   C(19)   C(18)   C(23)   -173(1)  1_555 1_555 1_555 1_555 yes
   C(20)   C(21)   C(17)   C(22)   173(1)   1_555 1_555 1_555 1_555 yes
   C(21)   Ru(2)   C(17)   C(22)   120(1)   1_555 1_555 1_555 1_555 yes
   C(21)   Ru(2)   C(18)   C(23)   157(1)   1_555 1_555 1_555 1_555 yes
   C(21)   Ru(2)   C(19)   C(24)   -156(1)  1_555 1_555 1_555 1_555 yes
   C(21)   Ru(2)   C(20)   C(25)   -119(1)  1_555 1_555 1_555 1_555 yes
   C(21)   C(17)   C(18)   C(23)   174(1)   1_555 1_555 1_555 1_555 yes
   C(21)   C(20)   C(19)   C(24)   -176(1)  1_555 1_555 1_555 1_555 yes
   C(22)   C(17)   C(18)   C(23)   0(2)     1_555 1_555 1_555 1_555 yes
   C(22)   C(17)   C(21)   C(26)   0(2)     1_555 1_555 1_555 1_555 yes
   C(23)   C(18)   C(19)   C(24)   1(2)     1_555 1_555 1_555 1_555 yes
   C(24)   C(19)   C(20)   C(25)   4(2)     1_555 1_555 1_555 1_555 yes
   C(25)   C(20)   C(21)   C(26)   -5(2)    1_555 1_555 1_555 1_555 yes
   C(27)   P(1)    C(33)   C(34)   7(1)     1_555 1_555 1_555 1_555 yes
   C(27)   P(1)    C(33)   C(38)   -177(1)  1_555 1_555 1_555 1_555 yes
   C(27)   P(1)    C(39)   C(40)   98(1)    1_555 1_555 1_555 1_555 yes
   C(27)   P(1)    C(39)   C(44)   -77(1)   1_555 1_555 1_555 1_555 yes
   C(27)   C(28)   C(29)   C(30)   1(2)     1_555 1_555 1_555 1_555 yes
   C(27)   C(32)   C(31)   C(30)   -1(2)    1_555 1_555 1_555 1_555 yes
   C(28)   C(27)   P(1)    C(33)   -85(1)   1_555 1_555 1_555 1_555 yes
   C(28)   C(27)   P(1)    C(39)   167(1)   1_555 1_555 1_555 1_555 yes
   C(28)   C(27)   C(32)   C(31)   2(2)     1_555 1_555 1_555 1_555 yes
   C(28)   C(29)   C(30)   C(31)   0(2)     1_555 1_555 1_555 1_555 yes
   C(29)   C(28)   C(27)   C(32)   -2(2)    1_555 1_555 1_555 1_555 yes
   C(29)   C(30)   C(31)   C(32)   0(2)     1_555 1_555 1_555 1_555 yes
   C(32)   C(27)   P(1)    C(33)   96(1)    1_555 1_555 1_555 1_555 yes
   C(32)   C(27)   P(1)    C(39)   -10(1)   1_555 1_555 1_555 1_555 yes
   C(33)   P(1)    C(39)   C(40)   -8(1)    1_555 1_555 1_555 1_555 yes
   C(33)   P(1)    C(39)   C(44)   175(1)   1_555 1_555 1_555 1_555 yes
   C(33)   C(34)   C(35)   C(36)   -2(3)    1_555 1_555 1_555 1_555 yes
   C(33)   C(38)   C(37)   C(36)   3(2)     1_555 1_555 1_555 1_555 yes
   C(34)   C(33)   P(1)    C(39)   114(1)   1_555 1_555 1_555 1_555 yes
   C(34)   C(33)   C(38)   C(37)   -2(2)    1_555 1_555 1_555 1_555 yes
   C(34)   C(35)   C(36)   C(37)   4(3)     1_555 1_555 1_555 1_555 yes
   C(35)   C(34)   C(33)   C(38)   1(2)     1_555 1_555 1_555 1_555 yes
   C(35)   C(36)   C(37)   C(38)   -4(3)    1_555 1_555 1_555 1_555 yes
   C(38)   C(33)   P(1)    C(39)   -69(1)   1_555 1_555 1_555 1_555 yes
   C(39)   C(40)   C(41)   C(42)   -3(3)    1_555 1_555 1_555 1_555 yes
   C(39)   C(44)   C(43)   C(42)   -1(3)    1_555 1_555 1_555 1_555 yes
   C(40)   C(39)   C(44)   C(43)   2(2)     1_555 1_555 1_555 1_555 yes
   C(40)   C(41)   C(42)   C(43)   4(3)     1_555 1_555 1_555 1_555 yes
   C(41)   C(40)   C(39)   C(44)   0(3)     1_555 1_555 1_555 1_555 yes
   C(41)   C(42)   C(43)   C(44)   -1(3)    1_555 1_555 1_555 1_555 yes
#------------------------------------------------------------------------------
loop_
_geom_contact_atom_site_label_1
_geom_contact_atom_site_label_2
_geom_contact_distance
_geom_contact_site_symmetry_1
_geom_contact_site_symmetry_2
_geom_contact_publ_flag
 Pd(1)     Pd(2)     2.804(2)   1_555 1_555 ?
 Pd(1)     Ru(1)     3.095(2)   1_555 1_555 ?
 Pd(1)     Ru(2)     2.934(2)   1_555 1_555 ?
 Pd(2)     Ru(1)     3.006(2)   1_555 1_555 ?
 Pd(2)     Ru(2)     2.857(2)   1_555 1_555 ?
 Ru(1)     Ru(2)     2.632(2)   1_555 1_555 ?
 C(20)     C(42)     3.51(2)    1_555 2_544 ?
#------------------------------------------------------------------------------

_publ_contact_author_name           'Yasushi MIZOBE'

_publ_contact_author_address
;
    Institute of Industrial Science, The University of Tokyo, 
Komaba, Meguro-ku, Tokyo 152-8505, JAPAN
;
_publ_contact_author_email            'ymizobe@iis.u-tokyo.ac.jp'
_publ_contact_author_fax              '+81-3-5452-6361'
_publ_contact_author_phone            '+81-3-5452-6360'
_publ_contact_letter
;
    ENTER TEXT OF LETTER
;
_publ_requested_journal               'Organometallics'
_publ_requested_category              ' CHOOSE FI FM FO CI CM CO or AD'

_publ_requested_coeditor_name          ?

_publ_section_title
;
    Structures and Reactivities of Palladium-Ruthenium 
Mixed-Metal Sulfido Clusters Derived from 
Disulfido- or Hydrosulfido-Bridged Diruthenium Complexes
;

_publ_section_title_footnote
;
    ENTER FOOTNOTE TO TITLE OF PAPER
;
loop_
_publ_author_name
_publ_author_footnote
_publ_author_address'Shigeki KUWATA'
;

;
;
  Department of Applied Chemistry, 
Graduate School of Science and Engineering, 
Tokyo Institute of Technology, O-okayama, 
Meguro-ku, Tokyo 152-8552, JAPAN
;

_publ_section_synopsis
;
    ENTER SYNOPSIS
;

_publ_section_abstract
;
    ENTER ABSTRACT
;

_publ_section_comment
;
    ENTER TEXT
;

_publ_section_acknowledgements
;
    ENTER ACKNOWLEDGEMENTS
;

_publ_section_experimental
;
    ENTER EXPERIMENTAL SECTION
;

_publ_section_references
;
    ENTER OTHER REFERENCES
Molecular Structure Corporation, Rigaku Corporation. (1998). teXsan. 
Single Crystal Structure Analysis Software. Version 1.9.
MSC, 3200 Research Forest Drive, The Woodlands, TX 77381, USA.
Rigaku, 3-9-12 Akishima, Tokyo, Japan.
North, A.C.T., Phillips, D. C. & Mathews, F. S. (1968).
Acta Cryst. A24, 351-359.
;

_publ_section_table_legends
;
    ENTER TABLE LEGENDS
;

_publ_section_figure_captions
;
    ENTER FIGURE CAPTIONS
;

_publ_section_exptl_prep
;
    ENTER COMPOUND PREPARATION DETAILS
;

_publ_section_exptl_refinement
;
    ENTER SPECIAL DETAILS OF THE REFINEMENT
;

#===END

data_compound4
#------------------------------------------------------------------------------
_audit_creation_date                  'Mon Aug 17 10:48:12 1998'
_audit_creation_method                'from TEXRAY.INF file'
_audit_update_record                   ?
#------------------------------------------------------------------------------
_computing_data_collection            'Rigaku/AFC Diffractometer Control'
_computing_cell_refinement            'Rigaku/AFC Diffractometer Control'
_computing_data_reduction             'teXsan'
_computing_structure_solution          'DIRDIF92 (PATTY)'
_computing_structure_refinement       'teXsan'
_computing_publication_material       'teXsan'
_computing_molecular_graphics          ?
#------------------------------------------------------------------------------
_chemical_compound_source              ?
_chemical_name_common                  ?
_chemical_formula_weight               1166.86
_chemical_formula_analytical           ?
_chemical_formula_sum                  'C41 H52 Br P Pd2 Ru2 S3 '
_chemical_formula_moiety               'C41 H52 Br P Pd2 Ru2 S3 '
_chemical_formula_structural           ?
_chemical_melting_point                ?
#------------------------------------------------------------------------------
_cell_length_a                         12.561(2)
_cell_length_b                         17.610(2)
_cell_length_c                         11.170(2)
_cell_angle_alpha                      97.41(1)
_cell_angle_beta                       115.43(1)
_cell_angle_gamma                      82.08(1)
_cell_volume                           2203.5(7)
_cell_formula_units_Z                  2
_cell_measurement_temperature          293.2
_cell_measurement_reflns_used          25
_cell_measurement_theta_min            19.8
_cell_measurement_theta_max            20.0
#------------------------------------------------------------------------------
_symmetry_cell_setting                 triclinic
_symmetry_space_group_name_H-M        'P -1         '
_symmetry_Int_Tables_number            2
_symmetry_space_group_name_Hall        ?
loop_
_symmetry_equiv_pos_as_xyz
x,y,z
-x,-y,-z
#------------------------------------------------------------------------------
_exptl_crystal_description            'plate'
_exptl_crystal_colour                 'dark'
_exptl_crystal_size_max                0.450
_exptl_crystal_size_mid                0.400
_exptl_crystal_size_min                0.350
_exptl_crystal_density_diffrn          1.759
_exptl_crystal_density_method         'not measured'
_exptl_crystal_F_000                   1152.00
_exptl_absorpt_coefficient_mu          2.591
_exptl_absorpt_correction_type         psi-scan
_exptl_absorpt_process_details        '(North, Phillips & Mathews, 1968)'
_exptl_absorpt_correction_T_min        0.731
_exptl_absorpt_correction_T_max        1.000
_exptl_special_details
;
 ?
;
#------------------------------------------------------------------------------
_diffrn_special_details
;
 ?
;
_diffrn_ambient_temperature            293.2
_diffrn_radiation_wavelength           0.7107
_diffrn_radiation_type                'Mo K\a'
_diffrn_radiation_source              'Rigaku rotating anode'
_diffrn_radiation_monochromator        graphite
_diffrn_radiation_detector            'scintillation counter'
_diffrn_measurement_device_type       'Rigaku AFC7R'
_diffrn_measurement_method             \w-2\q

_diffrn_standards_number              3
_diffrn_standards_interval_count      150
_diffrn_standards_decay_%             6.76
loop_
_diffrn_standard_refln_index_h
_diffrn_standard_refln_index_k
_diffrn_standard_refln_index_l
      2       1      0
      1       0      1
      1       1      1
_diffrn_reflns_number                  10605
_reflns_number_total                   10137
_reflns_number_gt                      4859
_reflns_observed_criterion             '>3.0sigma(I)'
_diffrn_reflns_av_R_equivalents        0.034
_diffrn_reflns_av_sigmaI/netI          0.000
_diffrn_reflns_limit_h_min             0
_diffrn_reflns_limit_h_max             16
_diffrn_reflns_limit_k_min             -22
_diffrn_reflns_limit_k_max             22
_diffrn_reflns_limit_l_min             -14
_diffrn_reflns_limit_l_max             13
_diffrn_reflns_theta_min               0.00
_diffrn_reflns_theta_max               0.00
_diffrn_reflns_reduction_process      'Lp corrections applied'
_diffrn_orient_matrix_UB_11            0.04297
_diffrn_orient_matrix_UB_12            0.03589
_diffrn_orient_matrix_UB_13            0.07817
_diffrn_orient_matrix_UB_21           -0.00314
_diffrn_orient_matrix_UB_22           -0.03558
_diffrn_orient_matrix_UB_23            0.06108
_diffrn_orient_matrix_UB_31            0.07734
_diffrn_orient_matrix_UB_32           -0.02744
_diffrn_orient_matrix_UB_33            0.00676
#------------------------------------------------------------------------------
loop_
_atom_type_symbol
_atom_type_description
_atom_type_scat_dispersion_real
_atom_type_scat_dispersion_imag
_atom_type_scat_source
  'C'  'C'   0.003 0.002 
;International Tables for Crystallography
(1992, Vol. C, Tables 4.2.6.8 and 6.1.1.1)
;
  'H'  'H'   0.000 0.000 
;International Tables for Crystallography
(1992, Vol. C, Table 6.1.1.2)
;
  'S'  'S'   0.125 0.123 
;International Tables for Crystallography
(1992, Vol. C, Tables 4.2.6.8 and 6.1.1.1)
;
  'P'  'P'   0.102 0.094 
;International Tables for Crystallography
(1992, Vol. C, Tables 4.2.6.8 and 6.1.1.1)
;
  'BrBr'   -0.290 2.459 
;International Tables for Crystallography
(1992, Vol. C, Tables 4.2.6.8 and 6.1.1.1)
;
  'RuRu'   -1.259 0.836 
;International Tables for Crystallography
(1992, Vol. C, Tables 4.2.6.8 and 6.1.1.1)
;
  'PdPd'   -0.999 1.007 
;International Tables for Crystallography
(1992, Vol. C, Tables 4.2.6.8 and 6.1.1.1)
;
#------------------------------------------------------------------------------
loop_
_atom_site_label
_atom_site_type_symbol
_atom_site_fract_x
_atom_site_fract_y
_atom_site_fract_z
_atom_site_U_iso_or_equiv
_atom_site_adp_type
_atom_site_occupancy
_atom_site_calc_flag
_atom_site_refinement_flags
_atom_site_disorder_assembly
_atom_site_disorder_group
 Pd(1)  Pd 0.34725(7)  0.23078(5)  0.40637(8)  0.0363(3)   Uani 1.00 d ...
 Pd(2)  Pd 0.22931(8)  0.19435(5)  0.54958(8)  0.0389(3)   Uani 1.00 d ...
 Ru(1)  Ru 0.09679(8)  0.30797(5)  0.34843(8)  0.0369(3)   Uani 1.00 d ...
 Ru(2)  Ru 0.12017(8)  0.16161(5)  0.27046(8)  0.0334(3)   Uani 1.00 d ...
 Br(1)  Br 0.2049(1)   0.18435(9)  0.7579(1)   0.0776(5)   Uani 1.00 d ...
 S(1)   S  0.1887(2)   0.2584(2)   0.2155(2)   0.0381(8)   Uani 1.00 d ...
 S(2)   S  0.0363(2)   0.2107(2)   0.4107(3)   0.0430(9)   Uani 1.00 d ...
 S(3)   S  0.4314(3)   0.1734(2)   0.6054(3)   0.0524(10)  Uani 1.00 d ...
 P(1)   P  0.4992(2)   0.2519(2)   0.3585(3)   0.0384(9)   Uani 1.00 d ...
 C(1)   C  0.521(1)    0.227(1)    0.753(1)    0.103(6)    Uani 1.00 d ...
 C(2)   C  0.579(2)    0.192(1)    0.854(2)    0.219(10)   Uani 1.00 d ...
 C(3)   C  0.468(1)    0.3067(9)   0.770(2)    0.101(6)    Uani 1.00 d ...
 C(4)   C  0.065(2)    0.4215(8)   0.278(2)    0.082(6)    Uani 1.00 d ...
 C(5)   C  0.146(1)    0.4251(6)   0.405(2)    0.070(5)    Uani 1.00 d ...
 C(6)   C  0.092(2)    0.4067(7)   0.484(1)    0.078(5)    Uani 1.00 d ...
 C(7)   C  -0.025(2)   0.3918(7)   0.395(3)    0.100(8)    Uani 1.00 d ...
 C(8)   C  -0.036(2)   0.3993(9)   0.268(2)    0.100(7)    Uani 1.00 d ...
 C(9)   C  0.096(3)    0.444(1)    0.169(3)    0.26(2)     Uani 1.00 d ...
 C(10)  C  0.270(2)    0.4484(9)   0.457(3)    0.22(1)     Uani 1.00 d ...
 C(11)  C  0.133(3)    0.405(1)    0.630(2)    0.27(1)     Uani 1.00 d ...
 C(12)  C  -0.127(2)   0.374(1)    0.419(4)    0.31(2)     Uani 1.00 d ...
 C(13)  C  -0.143(2)   0.394(1)    0.134(3)    0.31(1)     Uani 1.00 d ...
 C(14)  C  0.185(1)    0.0390(6)   0.248(1)    0.049(4)    Uani 1.00 d ...
 C(15)  C  0.164(1)    0.0740(6)   0.132(1)    0.051(4)    Uani 1.00 d ...
 C(16)  C  0.044(1)    0.1028(6)   0.075(1)    0.048(4)    Uani 1.00 d ...
 C(17)  C  -0.012(1)   0.0840(8)   0.154(2)    0.072(5)    Uani 1.00 d ...
 C(18)  C  0.079(1)    0.0427(6)   0.261(1)    0.063(5)    Uani 1.00 d ...
 C(19)  C  0.303(1)    -0.0016(8)  0.335(1)    0.089(6)    Uani 1.00 d ...
 C(20)  C  0.254(1)    0.0796(8)   0.077(1)    0.082(5)    Uani 1.00 d ...
 C(21)  C  -0.019(2)   0.1395(9)   -0.053(1)   0.122(6)    Uani 1.00 d ...
 C(22)  C  -0.137(1)   0.099(1)    0.130(2)    0.151(8)    Uani 1.00 d ...
 C(23)  C  0.063(2)    0.0079(8)   0.367(2)    0.118(8)    Uani 1.00 d ...
 C(24)  C  0.4691(9)   0.3250(6)   0.2429(10)  0.037(3)    Uani 1.00 d ...
 C(25)  C  0.525(1)    0.3920(8)   0.277(1)    0.069(5)    Uani 1.00 d ...
 C(26)  C  0.492(1)    0.4464(8)   0.186(2)    0.089(6)    Uani 1.00 d ...
 C(27)  C  0.404(1)    0.4375(9)   0.065(2)    0.084(6)    Uani 1.00 d ...
 C(28)  C  0.348(1)    0.372(1)    0.028(1)    0.078(6)    Uani 1.00 d ...
 C(29)  C  0.381(1)    0.3167(7)   0.117(1)    0.052(4)    Uani 1.00 d ...
 C(30)  C  0.6365(10)  0.2782(6)   0.5009(10)  0.041(3)    Uani 1.00 d ...
 C(31)  C  0.744(1)    0.2358(7)   0.527(1)    0.062(4)    Uani 1.00 d ...
 C(32)  C  0.842(1)    0.254(1)    0.639(2)    0.089(6)    Uani 1.00 d ...
 C(33)  C  0.835(1)    0.313(1)    0.725(2)    0.103(7)    Uani 1.00 d ...
 C(34)  C  0.731(2)    0.3575(8)   0.701(1)    0.079(6)    Uani 1.00 d ...
 C(35)  C  0.629(1)    0.3386(8)   0.587(1)    0.063(5)    Uani 1.00 d ...
 C(36)  C  0.5451(9)   0.1627(6)   0.285(1)    0.038(3)    Uani 1.00 d ...
 C(37)  C  0.5620(10)  0.0961(7)   0.347(1)    0.054(4)    Uani 1.00 d ...
 C(38)  C  0.596(1)    0.0269(7)   0.296(1)    0.063(4)    Uani 1.00 d ...
 C(39)  C  0.609(1)    0.0215(8)   0.182(2)    0.073(5)    Uani 1.00 d ...
 C(40)  C  0.589(1)    0.0851(8)   0.116(1)    0.068(5)    Uani 1.00 d ...
 C(41)  C  0.560(1)    0.1581(7)   0.169(1)    0.060(4)    Uani 1.00 d ...
 H(1)   H  0.5822      0.2367      0.7311      0.1231      Uiso 1.00 calc ...
 H(2)   H  0.5269      0.1781      0.8879      0.2627      Uiso 1.00 calc ...
 H(3)   H  0.6195      0.1464      0.8321      0.2627      Uiso 1.00 calc ...
 H(4)   H  0.6344      0.2236      0.9194      0.2627      Uiso 1.00 calc ...
 H(5)   H  0.5270      0.3353      0.8394      0.1207      Uiso 1.00 calc ...
 H(6)   H  0.4412      0.3308      0.6896      0.1207      Uiso 1.00 calc ...
 H(7)   H  0.4040      0.3050      0.7928      0.1207      Uiso 1.00 calc ...
 H(8)   H  0.1630      0.4115      0.1675      0.3089      Uiso 1.00 calc ...
 H(9)   H  0.0309      0.4381      0.0850      0.3089      Uiso 1.00 calc ...
 H(10)  H  0.1146      0.4959      0.1870      0.3089      Uiso 1.00 calc ...
 H(11)  H  0.3067      0.4486      0.5507      0.2605      Uiso 1.00 calc ...
 H(12)  H  0.3142      0.4128      0.4199      0.2605      Uiso 1.00 calc ...
 H(13)  H  0.2671      0.4984      0.4314      0.2605      Uiso 1.00 calc ...
 H(14)  H  0.1222      0.3558      0.6482      0.3270      Uiso 1.00 calc ...
 H(15)  H  0.2147      0.4128      0.6731      0.3270      Uiso 1.00 calc ...
 H(16)  H  0.0889      0.4437      0.6606      0.3270      Uiso 1.00 calc ...
 H(17)  H  -0.1890     0.4137      0.3899      0.3668      Uiso 1.00 calc ...
 H(18)  H  -0.1540     0.3265      0.3713      0.3668      Uiso 1.00 calc ...
 H(19)  H  -0.1016     0.3697      0.5114      0.3668      Uiso 1.00 calc ...
 H(20)  H  -0.1632     0.4427      0.0971      0.3714      Uiso 1.00 calc ...
 H(21)  H  -0.1246     0.3564      0.0749      0.3714      Uiso 1.00 calc ...
 H(22)  H  -0.2078     0.3803      0.1461      0.3714      Uiso 1.00 calc ...
 H(23)  H  0.2956      -0.0219     0.4056      0.1068      Uiso 1.00 calc ...
 H(24)  H  0.3253      -0.0423     0.2834      0.1068      Uiso 1.00 calc ...
 H(25)  H  0.3615      0.0339      0.3705      0.1068      Uiso 1.00 calc ...
 H(26)  H  0.2836      0.0294      0.0568      0.0980      Uiso 1.00 calc ...
 H(27)  H  0.2174      0.1065      -0.0010     0.0980      Uiso 1.00 calc ...
 H(28)  H  0.3177      0.1065      0.1419      0.0980      Uiso 1.00 calc ...
 H(29)  H  0.0160      0.1849      -0.0478     0.1462      Uiso 1.00 calc ...
 H(30)  H  -0.0144     0.1048      -0.1230     0.1462      Uiso 1.00 calc ...
 H(31)  H  -0.0999     0.1524      -0.0687     0.1462      Uiso 1.00 calc ...
 H(32)  H  -0.1433     0.1297      0.2031      0.1816      Uiso 1.00 calc ...
 H(33)  H  -0.1795     0.1246      0.0511      0.1816      Uiso 1.00 calc ...
 H(34)  H  -0.1686     0.0512      0.1204      0.1816      Uiso 1.00 calc ...
 H(35)  H  -0.0168     0.0196      0.3568      0.1417      Uiso 1.00 calc ...
 H(36)  H  0.0798      -0.0463     0.3599      0.1417      Uiso 1.00 calc ...
 H(37)  H  0.1147      0.0284      0.4522      0.1417      Uiso 1.00 calc ...
 H(38)  H  0.5861      0.4006      0.3630      0.0823      Uiso 1.00 calc ...
 H(39)  H  0.5329      0.4914      0.2103      0.1068      Uiso 1.00 calc ...
 H(40)  H  0.3806      0.4767      0.0053      0.1011      Uiso 1.00 calc ...
 H(41)  H  0.2874      0.3639      -0.0584     0.0937      Uiso 1.00 calc ...
 H(42)  H  0.3402      0.2714      0.0907      0.0628      Uiso 1.00 calc ...
 H(43)  H  0.7496      0.1936      0.4675      0.0741      Uiso 1.00 calc ...
 H(44)  H  0.9156      0.2254      0.6559      0.1063      Uiso 1.00 calc ...
 H(45)  H  0.9034      0.3238      0.8045      0.1240      Uiso 1.00 calc ...
 H(46)  H  0.7280      0.4008      0.7600      0.0945      Uiso 1.00 calc ...
 H(47)  H  0.5555      0.3679      0.5709      0.0752      Uiso 1.00 calc ...
 H(48)  H  0.5498      0.0985      0.4259      0.0648      Uiso 1.00 calc ...
 H(49)  H  0.6102      -0.0178     0.3424      0.0755      Uiso 1.00 calc ...
 H(50)  H  0.6331      -0.0269     0.1478      0.0880      Uiso 1.00 calc ...
 H(51)  H  0.5952      0.0806      0.0329      0.0810      Uiso 1.00 calc ...
 H(52)  H  0.5500      0.2031      0.1250      0.0726      Uiso 1.00 calc ...

loop_
_atom_site_aniso_label
_atom_site_aniso_U_11
_atom_site_aniso_U_22
_atom_site_aniso_U_33
_atom_site_aniso_U_12
_atom_site_aniso_U_13
_atom_site_aniso_U_23
 Pd(1)  0.0372(5)   0.0350(5)   0.0409(5)   -0.0053(4)  0.0193(4)   0.0021(4)  
 Pd(2)  0.0518(6)   0.0344(5)   0.0369(5)   -0.0029(4)  0.0245(4)   0.0027(4)  
 Ru(1)  0.0432(6)   0.0248(5)   0.0444(5)   0.0016(4)   0.0214(5)   0.0000(4)  
 Ru(2)  0.0391(6)   0.0257(5)   0.0364(5)   -0.0063(4)  0.0175(4)   -0.0057(4) 
 Br(1)  0.094(1)    0.102(1)    0.0570(9)   0.0069(9)   0.0497(8)   0.0249(8)  
 S(1)   0.048(2)    0.032(2)    0.037(2)    -0.003(1)   0.021(1)    0.002(1)   
 S(2)   0.046(2)    0.038(2)    0.056(2)    -0.005(1)   0.031(2)    -0.003(1)  
 S(3)   0.048(2)    0.054(2)    0.050(2)    0.004(2)    0.015(2)    0.013(2)   
 P(1)   0.036(2)    0.042(2)    0.041(2)    -0.006(1)   0.018(1)    0.005(1)   
 C(1)   0.09(1)     0.11(1)     0.059(10)   0.01(1)     -0.013(9)   0.024(10)  
 C(2)   0.32(3)     0.06(1)     0.09(1)     0.04(2)     -0.06(2)    -0.02(1)   
 C(3)   0.10(1)     0.07(1)     0.12(1)     -0.015(10)  0.04(1)     -0.027(9)  
 C(4)   0.15(2)     0.035(8)    0.056(10)   0.030(10)   0.05(1)     0.012(7)   
 C(5)   0.07(1)     0.017(7)    0.13(1)     0.001(6)    0.05(1)     0.000(8)   
 C(6)   0.15(2)     0.013(7)    0.057(9)    0.022(9)    0.04(1)     -0.001(6)  
 C(7)   0.13(2)     0.015(7)    0.23(2)     0.016(9)    0.15(2)     0.01(1)    
 C(8)   0.06(1)     0.05(1)     0.14(2)     0.018(9)    0.00(1)     -0.01(1)   
 C(9)   0.59(5)     0.07(1)     0.27(3)     0.09(2)     0.33(4)     0.09(2)    
 C(10)  0.12(2)     0.04(1)     0.48(4)     -0.04(1)    0.10(2)     -0.05(2)   
 C(11)  0.61(5)     0.08(1)     0.07(1)     0.13(2)     0.13(2)     0.03(1)    
 C(12)  0.28(3)     0.07(2)     0.79(7)     0.04(2)     0.45(5)     0.04(3)    
 C(13)  0.21(3)     0.15(2)     0.26(3)     0.10(2)     -0.15(2)    -0.04(2)   
 C(14)  0.075(9)    0.022(6)    0.048(7)    -0.003(6)   0.025(7)    -0.006(5)  
 C(15)  0.066(9)    0.041(7)    0.052(7)    -0.013(6)   0.033(7)    -0.013(6)  
 C(16)  0.046(8)    0.037(7)    0.043(7)    -0.001(6)   0.004(6)    -0.007(5)  
 C(17)  0.048(9)    0.055(9)    0.10(1)     -0.028(7)   0.030(9)    -0.046(8)  
 C(18)  0.11(1)     0.027(7)    0.082(10)   -0.024(7)   0.071(10)   -0.014(6)  
 C(19)  0.09(1)     0.07(1)     0.08(1)     0.022(9)    0.022(9)    0.014(8)   
 C(20)  0.11(1)     0.07(1)     0.09(1)     -0.036(9)   0.071(10)   -0.039(8)  
 C(21)  0.17(2)     0.07(1)     0.048(9)    0.00(1)     -0.02(1)    -0.008(8)  
 C(22)  0.05(1)     0.14(2)     0.24(2)     -0.05(1)    0.05(1)     -0.12(2)   
 C(23)  0.23(2)     0.06(1)     0.14(1)     -0.06(1)    0.14(2)     -0.031(10) 
 C(24)  0.038(7)    0.030(6)    0.047(7)    -0.004(5)   0.019(6)    0.009(5)   
 C(25)  0.08(1)     0.059(9)    0.065(9)    -0.013(8)   0.020(8)    0.018(7)   
 C(26)  0.08(1)     0.06(1)     0.11(1)     -0.024(9)   0.01(1)     0.026(9)   
 C(27)  0.07(1)     0.09(1)     0.09(1)     0.000(10)   0.028(10)   0.05(1)    
 C(28)  0.07(1)     0.12(1)     0.062(9)    -0.016(9)   0.031(8)    0.028(9)   
 C(29)  0.053(8)    0.071(9)    0.045(7)    -0.011(7)   0.026(6)    0.019(6)   
 C(30)  0.045(7)    0.039(7)    0.041(6)    -0.016(6)   0.015(6)    0.004(5)   
 C(31)  0.056(9)    0.058(9)    0.066(9)    -0.021(7)   0.013(7)    0.010(7)   
 C(32)  0.08(1)     0.10(1)     0.08(1)     -0.02(1)    0.012(10)   0.020(10)  
 C(33)  0.07(1)     0.17(2)     0.06(1)     -0.05(1)    -0.011(9)   0.03(1)    
 C(34)  0.11(1)     0.07(1)     0.056(9)    -0.052(10)  0.029(10)   -0.017(7)  
 C(35)  0.062(9)    0.08(1)     0.056(8)    -0.026(8)   0.026(7)    0.004(7)   
 C(36)  0.035(6)    0.033(6)    0.052(7)    -0.005(5)   0.023(6)    -0.006(5)  
 C(37)  0.052(8)    0.054(9)    0.055(8)    -0.006(6)   0.022(6)    0.000(6)   
 C(38)  0.067(9)    0.041(8)    0.077(10)   0.001(7)    0.028(8)    0.001(7)   
 C(39)  0.057(9)    0.07(1)     0.09(1)     -0.007(8)   0.043(9)    -0.023(9)  
 C(40)  0.07(1)     0.07(1)     0.075(10)   -0.007(8)   0.050(8)    -0.011(8)  
 C(41)  0.066(9)    0.063(9)    0.071(9)    -0.003(7)   0.048(8)    0.000(7)   
#------------------------------------------------------------------------------
_refine_special_details
;
;

_refine_ls_structure_factor_coef       Fsqd
_refine_ls_matrix_type                 full
_refine_ls_weighting_scheme            calc
_refine_ls_weighting_details
   'w = 1/[\s^2^(Fo^2^) + 0.00000(Fo^2^)^2^]'
_refine_ls_hydrogen_treatment          noref
_refine_ls_extinction_method           
   'Zachariasen(1967) type 2 Gaussian isotropic'
_refine_ls_extinction_coef             0.0006(2)
_refine_ls_abs_structure_details       ?
_refine_ls_abs_structure_Flack         ?
_refine_ls_number_reflns               4859
_refine_ls_number_parameters           452
_refine_ls_number_restraints           0
_refine_ls_number_constraints          0
_refine_ls_R_factor_all                0.0511
_refine_ls_R_factor_gt                 0.0511
_refine_ls_wR_factor_all               ?
_refine_ls_wR_factor_ref               0.0946
_refine_ls_wR_factor_gt                0.0946
_refine_ls_goodness_of_fit_all         ?
_refine_ls_goodness_of_fit_ref         1.799
_refine_ls_shift/su_max                0.0037
_refine_ls_shift/su_mean               0.0004
_refine_diff_density_min               -0.82
_refine_diff_density_max               0.87
#------------------------------------------------------------------------------
_geom_special_details
;
 ?
;
loop_
_geom_bond_atom_site_label_1
_geom_bond_atom_site_label_2
_geom_bond_distance
_geom_bond_site_symmetry_1
_geom_bond_site_symmetry_2
_geom_bond_publ_flag
 Pd(1)     Pd(2)     2.780(1)   1_555 1_555 yes
 Pd(1)     Ru(1)     3.076(1)   1_555 1_555 yes
 Pd(1)     Ru(2)     2.947(1)   1_555 1_555 yes
 Pd(1)     S(1)      2.259(3)   1_555 1_555 yes
 Pd(1)     S(3)      2.313(3)   1_555 1_555 yes
 Pd(1)     P(1)      2.278(3)   1_555 1_555 yes
 Pd(2)     Ru(1)     2.975(1)   1_555 1_555 yes
 Pd(2)     Ru(2)     2.831(1)   1_555 1_555 yes
 Pd(2)     Br(1)     2.505(1)   1_555 1_555 yes
 Pd(2)     S(2)      2.249(3)   1_555 1_555 yes
 Pd(2)     S(3)      2.326(3)   1_555 1_555 yes
 Ru(1)     Ru(2)     2.631(1)   1_555 1_555 yes
 Ru(1)     S(1)      2.272(3)   1_555 1_555 yes
 Ru(1)     S(2)      2.262(3)   1_555 1_555 yes
 Ru(1)     C(4)      2.17(1)    1_555 1_555 yes
 Ru(1)     C(5)      2.17(1)    1_555 1_555 yes
 Ru(1)     C(6)      2.17(1)    1_555 1_555 yes
 Ru(1)     C(7)      2.15(1)    1_555 1_555 yes
 Ru(1)     C(8)      2.12(1)    1_555 1_555 yes
 Ru(2)     S(1)      2.269(3)   1_555 1_555 yes
 Ru(2)     S(2)      2.265(3)   1_555 1_555 yes
 Ru(2)     C(14)     2.22(1)    1_555 1_555 yes
 Ru(2)     C(15)     2.23(1)    1_555 1_555 yes
 Ru(2)     C(16)     2.16(1)    1_555 1_555 yes
 Ru(2)     C(17)     2.15(1)    1_555 1_555 yes
 Ru(2)     C(18)     2.21(1)    1_555 1_555 yes
 S(3)      C(1)      1.78(2)    1_555 1_555 yes
 P(1)      C(24)     1.829(10)  1_555 1_555 yes
 P(1)      C(30)     1.84(1)    1_555 1_555 yes
 P(1)      C(36)     1.819(10)  1_555 1_555 yes
 C(1)      C(2)      1.23(2)    1_555 1_555 yes
 C(1)      C(3)      1.50(2)    1_555 1_555 yes
 C(4)      C(5)      1.35(2)    1_555 1_555 yes
 C(4)      C(8)      1.33(2)    1_555 1_555 yes
 C(4)      C(9)      1.53(2)    1_555 1_555 yes
 C(5)      C(6)      1.42(2)    1_555 1_555 yes
 C(5)      C(10)     1.51(2)    1_555 1_555 yes
 C(6)      C(7)      1.41(2)    1_555 1_555 yes
 C(6)      C(11)     1.48(2)    1_555 1_555 yes
 C(7)      C(8)      1.39(2)    1_555 1_555 yes
 C(7)      C(12)     1.50(2)    1_555 1_555 yes
 C(8)      C(13)     1.53(2)    1_555 1_555 yes
 C(14)     C(15)     1.41(1)    1_555 1_555 yes
 C(14)     C(18)     1.40(2)    1_555 1_555 yes
 C(14)     C(19)     1.52(2)    1_555 1_555 yes
 C(15)     C(16)     1.41(1)    1_555 1_555 yes
 C(15)     C(20)     1.52(2)    1_555 1_555 yes
 C(16)     C(17)     1.43(2)    1_555 1_555 yes
 C(16)     C(21)     1.48(2)    1_555 1_555 yes
 C(17)     C(18)     1.45(2)    1_555 1_555 yes
 C(17)     C(22)     1.47(2)    1_555 1_555 yes
 C(18)     C(23)     1.50(2)    1_555 1_555 yes
 C(24)     C(25)     1.38(2)    1_555 1_555 yes
 C(24)     C(29)     1.37(1)    1_555 1_555 yes
 C(25)     C(26)     1.38(2)    1_555 1_555 yes
 C(26)     C(27)     1.33(2)    1_555 1_555 yes
 C(27)     C(28)     1.36(2)    1_555 1_555 yes
 C(28)     C(29)     1.37(2)    1_555 1_555 yes
 C(30)     C(31)     1.38(2)    1_555 1_555 yes
 C(30)     C(35)     1.36(2)    1_555 1_555 yes
 C(31)     C(32)     1.37(2)    1_555 1_555 yes
 C(32)     C(33)     1.34(2)    1_555 1_555 yes
 C(33)     C(34)     1.36(2)    1_555 1_555 yes
 C(34)     C(35)     1.41(2)    1_555 1_555 yes
 C(36)     C(37)     1.39(1)    1_555 1_555 yes
 C(36)     C(41)     1.37(1)    1_555 1_555 yes
 C(37)     C(38)     1.37(2)    1_555 1_555 yes
 C(38)     C(39)     1.35(2)    1_555 1_555 yes
 C(39)     C(40)     1.36(2)    1_555 1_555 yes
 C(40)     C(41)     1.42(2)    1_555 1_555 yes
#------------------------------------------------------------------------------
loop_
_geom_angle_atom_site_label_1
_geom_angle_atom_site_label_2
_geom_angle_atom_site_label_3
_geom_angle
_geom_angle_site_symmetry_1
_geom_angle_site_symmetry_2
_geom_angle_site_symmetry_3
_geom_angle_publ_flag
   Pd(2)     Pd(1)     Ru(1)     60.82(3)   1_555 1_555 1_555 yes
   Pd(2)     Pd(1)     Ru(2)     59.17(3)   1_555 1_555 1_555 yes
   Pd(2)     Pd(1)     S(1)      98.80(7)   1_555 1_555 1_555 yes
   Pd(2)     Pd(1)     S(3)      53.39(8)   1_555 1_555 1_555 yes
   Pd(2)     Pd(1)     P(1)      159.66(8)  1_555 1_555 1_555 yes
   Ru(1)     Pd(1)     Ru(2)     51.74(3)   1_555 1_555 1_555 yes
   Ru(1)     Pd(1)     S(1)      47.42(7)   1_555 1_555 1_555 yes
   Ru(1)     Pd(1)     S(3)      112.11(8)  1_555 1_555 1_555 yes
   Ru(1)     Pd(1)     P(1)      135.78(8)  1_555 1_555 1_555 yes
   Ru(2)     Pd(1)     S(1)      49.54(7)   1_555 1_555 1_555 yes
   Ru(2)     Pd(1)     S(3)      101.64(8)  1_555 1_555 1_555 yes
   Ru(2)     Pd(1)     P(1)      137.80(8)  1_555 1_555 1_555 yes
   S(1)      Pd(1)     S(3)      150.3(1)   1_555 1_555 1_555 yes
   S(1)      Pd(1)     P(1)      101.5(1)   1_555 1_555 1_555 yes
   S(3)      Pd(1)     P(1)      106.7(1)   1_555 1_555 1_555 yes
   Pd(1)     Pd(2)     Ru(1)     64.52(3)   1_555 1_555 1_555 yes
   Pd(1)     Pd(2)     Ru(2)     63.36(3)   1_555 1_555 1_555 yes
   Pd(1)     Pd(2)     Br(1)     154.28(5)  1_555 1_555 1_555 yes
   Pd(1)     Pd(2)     S(2)      104.56(7)  1_555 1_555 1_555 yes
   Pd(1)     Pd(2)     S(3)      52.97(7)   1_555 1_555 1_555 yes
   Ru(1)     Pd(2)     Ru(2)     53.81(3)   1_555 1_555 1_555 yes
   Ru(1)     Pd(2)     Br(1)     126.17(5)  1_555 1_555 1_555 yes
   Ru(1)     Pd(2)     S(2)      48.91(7)   1_555 1_555 1_555 yes
   Ru(1)     Pd(2)     S(3)      115.27(8)  1_555 1_555 1_555 yes
   Ru(2)     Pd(2)     Br(1)     142.34(5)  1_555 1_555 1_555 yes
   Ru(2)     Pd(2)     S(2)      51.40(7)   1_555 1_555 1_555 yes
   Ru(2)     Pd(2)     S(3)      104.78(8)  1_555 1_555 1_555 yes
   Br(1)     Pd(2)     S(2)      97.89(8)   1_555 1_555 1_555 yes
   Br(1)     Pd(2)     S(3)      106.33(8)  1_555 1_555 1_555 yes
   S(2)      Pd(2)     S(3)      155.5(1)   1_555 1_555 1_555 yes
   Pd(1)     Ru(1)     Pd(2)     54.65(3)   1_555 1_555 1_555 yes
   Pd(1)     Ru(1)     Ru(2)     61.60(3)   1_555 1_555 1_555 yes
   Pd(1)     Ru(1)     S(1)      47.06(7)   1_555 1_555 1_555 yes
   Pd(1)     Ru(1)     S(2)      95.56(8)   1_555 1_555 1_555 yes
   Pd(1)     Ru(1)     C(4)      113.5(6)   1_555 1_555 1_555 yes
   Pd(1)     Ru(1)     C(5)      96.5(4)    1_555 1_555 1_555 yes
   Pd(1)     Ru(1)     C(6)      114.1(6)   1_555 1_555 1_555 yes
   Pd(1)     Ru(1)     C(7)      152.1(8)   1_555 1_555 1_555 yes
   Pd(1)     Ru(1)     C(8)      149.0(7)   1_555 1_555 1_555 yes
   Pd(2)     Ru(1)     Ru(2)     60.30(3)   1_555 1_555 1_555 yes
   Pd(2)     Ru(1)     S(1)      93.12(7)   1_555 1_555 1_555 yes
   Pd(2)     Ru(1)     S(2)      48.55(8)   1_555 1_555 1_555 yes
   Pd(2)     Ru(1)     C(4)      152.2(6)   1_555 1_555 1_555 yes
   Pd(2)     Ru(1)     C(5)      116.2(5)   1_555 1_555 1_555 yes
   Pd(2)     Ru(1)     C(6)      97.9(3)    1_555 1_555 1_555 yes
   Pd(2)     Ru(1)     C(7)      115.6(7)   1_555 1_555 1_555 yes
   Pd(2)     Ru(1)     C(8)      153.1(8)   1_555 1_555 1_555 yes
   Ru(2)     Ru(1)     S(1)      54.55(7)   1_555 1_555 1_555 yes
   Ru(2)     Ru(1)     S(2)      54.52(7)   1_555 1_555 1_555 yes
   Ru(2)     Ru(1)     C(4)      141.2(4)   1_555 1_555 1_555 yes
   Ru(2)     Ru(1)     C(5)      156.3(4)   1_555 1_555 1_555 yes
   Ru(2)     Ru(1)     C(6)      156.8(4)   1_555 1_555 1_555 yes
   Ru(2)     Ru(1)     C(7)      141.0(5)   1_555 1_555 1_555 yes
   Ru(2)     Ru(1)     C(8)      133.1(4)   1_555 1_555 1_555 yes
   S(1)      Ru(1)     S(2)      109.0(1)   1_555 1_555 1_555 yes
   S(1)      Ru(1)     C(4)      92.7(4)    1_555 1_555 1_555 yes
   S(1)      Ru(1)     C(5)      104.4(4)   1_555 1_555 1_555 yes
   S(1)      Ru(1)     C(6)      141.4(6)   1_555 1_555 1_555 yes
   S(1)      Ru(1)     C(7)      151.2(6)   1_555 1_555 1_555 yes
   S(1)      Ru(1)     C(8)      113.6(7)   1_555 1_555 1_555 yes
   S(2)      Ru(1)     C(4)      150.9(6)   1_555 1_555 1_555 yes
   S(2)      Ru(1)     C(5)      143.5(5)   1_555 1_555 1_555 yes
   S(2)      Ru(1)     C(6)      106.0(5)   1_555 1_555 1_555 yes
   S(2)      Ru(1)     C(7)      92.4(4)    1_555 1_555 1_555 yes
   S(2)      Ru(1)     C(8)      115.1(7)   1_555 1_555 1_555 yes
   C(4)      Ru(1)     C(5)      36.2(5)    1_555 1_555 1_555 yes
   C(4)      Ru(1)     C(6)      62.0(5)    1_555 1_555 1_555 yes
   C(4)      Ru(1)     C(7)      61.4(5)    1_555 1_555 1_555 yes
   C(4)      Ru(1)     C(8)      36.1(6)    1_555 1_555 1_555 yes
   C(5)      Ru(1)     C(6)      38.1(5)    1_555 1_555 1_555 yes
   C(5)      Ru(1)     C(7)      62.7(5)    1_555 1_555 1_555 yes
   C(5)      Ru(1)     C(8)      61.8(6)    1_555 1_555 1_555 yes
   C(6)      Ru(1)     C(7)      38.2(6)    1_555 1_555 1_555 yes
   C(6)      Ru(1)     C(8)      63.5(6)    1_555 1_555 1_555 yes
   C(7)      Ru(1)     C(8)      37.9(6)    1_555 1_555 1_555 yes
   Pd(1)     Ru(2)     Pd(2)     57.47(3)   1_555 1_555 1_555 yes
   Pd(1)     Ru(2)     Ru(1)     66.67(3)   1_555 1_555 1_555 yes
   Pd(1)     Ru(2)     S(1)      49.24(7)   1_555 1_555 1_555 yes
   Pd(1)     Ru(2)     S(2)      99.11(8)   1_555 1_555 1_555 yes
   Pd(1)     Ru(2)     C(14)     100.2(3)   1_555 1_555 1_555 yes
   Pd(1)     Ru(2)     C(15)     99.5(3)    1_555 1_555 1_555 yes
   Pd(1)     Ru(2)     C(16)     129.2(3)   1_555 1_555 1_555 yes
   Pd(1)     Ru(2)     C(17)     162.2(3)   1_555 1_555 1_555 yes
   Pd(1)     Ru(2)     C(18)     130.3(4)   1_555 1_555 1_555 yes
   Pd(2)     Ru(2)     Ru(1)     65.90(3)   1_555 1_555 1_555 yes
   Pd(2)     Ru(2)     S(1)      97.09(7)   1_555 1_555 1_555 yes
   Pd(2)     Ru(2)     S(2)      50.91(8)   1_555 1_555 1_555 yes
   Pd(2)     Ru(2)     C(14)     102.0(3)   1_555 1_555 1_555 yes
   Pd(2)     Ru(2)     C(15)     132.9(3)   1_555 1_555 1_555 yes
   Pd(2)     Ru(2)     C(16)     163.1(3)   1_555 1_555 1_555 yes
   Pd(2)     Ru(2)     C(17)     129.7(5)   1_555 1_555 1_555 yes
   Pd(2)     Ru(2)     C(18)     99.9(3)    1_555 1_555 1_555 yes
   Ru(1)     Ru(2)     S(1)      54.65(7)   1_555 1_555 1_555 yes
   Ru(1)     Ru(2)     S(2)      54.42(7)   1_555 1_555 1_555 yes
   Ru(1)     Ru(2)     C(14)     165.3(3)   1_555 1_555 1_555 yes
   Ru(1)     Ru(2)     C(15)     147.5(3)   1_555 1_555 1_555 yes
   Ru(1)     Ru(2)     C(16)     130.2(3)   1_555 1_555 1_555 yes
   Ru(1)     Ru(2)     C(17)     130.4(4)   1_555 1_555 1_555 yes
   Ru(1)     Ru(2)     C(18)     149.2(3)   1_555 1_555 1_555 yes
   S(1)      Ru(2)     S(2)      109.0(1)   1_555 1_555 1_555 yes
   S(1)      Ru(2)     C(14)     122.2(3)   1_555 1_555 1_555 yes
   S(1)      Ru(2)     C(15)     93.6(3)    1_555 1_555 1_555 yes
   S(1)      Ru(2)     C(16)     97.5(3)    1_555 1_555 1_555 yes
   S(1)      Ru(2)     C(17)     132.3(5)   1_555 1_555 1_555 yes
   S(1)      Ru(2)     C(18)     155.7(3)   1_555 1_555 1_555 yes
   S(2)      Ru(2)     C(14)     125.3(3)   1_555 1_555 1_555 yes
   S(2)      Ru(2)     C(15)     156.8(3)   1_555 1_555 1_555 yes
   S(2)      Ru(2)     C(16)     130.5(3)   1_555 1_555 1_555 yes
   S(2)      Ru(2)     C(17)     96.3(4)    1_555 1_555 1_555 yes
   S(2)      Ru(2)     C(18)     95.1(3)    1_555 1_555 1_555 yes
   C(14)     Ru(2)     C(15)     36.9(4)    1_555 1_555 1_555 yes
   C(14)     Ru(2)     C(16)     62.7(4)    1_555 1_555 1_555 yes
   C(14)     Ru(2)     C(17)     63.4(5)    1_555 1_555 1_555 yes
   C(14)     Ru(2)     C(18)     36.8(4)    1_555 1_555 1_555 yes
   C(15)     Ru(2)     C(16)     37.4(4)    1_555 1_555 1_555 yes
   C(15)     Ru(2)     C(17)     63.5(4)    1_555 1_555 1_555 yes
   C(15)     Ru(2)     C(18)     62.1(4)    1_555 1_555 1_555 yes
   C(16)     Ru(2)     C(17)     38.8(4)    1_555 1_555 1_555 yes
   C(16)     Ru(2)     C(18)     63.7(4)    1_555 1_555 1_555 yes
   C(17)     Ru(2)     C(18)     38.7(5)    1_555 1_555 1_555 yes
   Pd(1)     S(1)      Ru(1)     85.53(9)   1_555 1_555 1_555 yes
   Pd(1)     S(1)      Ru(2)     81.21(9)   1_555 1_555 1_555 yes
   Ru(1)     S(1)      Ru(2)     70.80(8)   1_555 1_555 1_555 yes
   Pd(2)     S(2)      Ru(1)     82.54(10)  1_555 1_555 1_555 yes
   Pd(2)     S(2)      Ru(2)     77.70(9)   1_555 1_555 1_555 yes
   Ru(1)     S(2)      Ru(2)     71.06(8)   1_555 1_555 1_555 yes
   Pd(1)     S(3)      Pd(2)     73.64(9)   1_555 1_555 1_555 yes
   Pd(1)     S(3)      C(1)      119.4(6)   1_555 1_555 1_555 yes
   Pd(2)     S(3)      C(1)      114.4(6)   1_555 1_555 1_555 yes
   Pd(1)     P(1)      C(24)     117.0(3)   1_555 1_555 1_555 yes
   Pd(1)     P(1)      C(30)     116.5(3)   1_555 1_555 1_555 yes
   Pd(1)     P(1)      C(36)     108.5(3)   1_555 1_555 1_555 yes
   C(24)     P(1)      C(30)     103.8(5)   1_555 1_555 1_555 yes
   C(24)     P(1)      C(36)     106.2(5)   1_555 1_555 1_555 yes
   C(30)     P(1)      C(36)     103.7(5)   1_555 1_555 1_555 yes
   S(3)      C(1)      C(2)      118(1)     1_555 1_555 1_555 yes
   S(3)      C(1)      C(3)      113(1)     1_555 1_555 1_555 yes
   S(3)      C(1)      H(1)      100(1)     1_555 1_555 1_555 no
   C(2)      C(1)      C(3)      118(1)     1_555 1_555 1_555 yes
   C(2)      C(1)      H(1)      100(2)     1_555 1_555 1_555 no
   C(3)      C(1)      H(1)      100(1)     1_555 1_555 1_555 no
   C(1)      C(2)      H(2)      109(2)     1_555 1_555 1_555 no
   C(1)      C(2)      H(3)      109(2)     1_555 1_555 1_555 no
   C(1)      C(2)      H(4)      109(2)     1_555 1_555 1_555 no
   H(2)      C(2)      H(3)      109(2)     1_555 1_555 1_555 no
   H(2)      C(2)      H(4)      109(2)     1_555 1_555 1_555 no
   H(3)      C(2)      H(4)      109(2)     1_555 1_555 1_555 no
   C(1)      C(3)      H(5)      109(1)     1_555 1_555 1_555 no
   C(1)      C(3)      H(6)      109(1)     1_555 1_555 1_555 no
   C(1)      C(3)      H(7)      109(1)     1_555 1_555 1_555 no
   H(5)      C(3)      H(6)      109(1)     1_555 1_555 1_555 no
   H(5)      C(3)      H(7)      109(1)     1_555 1_555 1_555 no
   H(6)      C(3)      H(7)      109(1)     1_555 1_555 1_555 no
   Ru(1)     C(4)      C(5)      72.1(7)    1_555 1_555 1_555 yes
   Ru(1)     C(4)      C(8)      70.2(9)    1_555 1_555 1_555 yes
   Ru(1)     C(4)      C(9)      126.1(10)  1_555 1_555 1_555 yes
   C(5)      C(4)      C(8)      110(1)     1_555 1_555 1_555 yes
   C(5)      C(4)      C(9)      119(2)     1_555 1_555 1_555 yes
   C(8)      C(4)      C(9)      129(2)     1_555 1_555 1_555 yes
   Ru(1)     C(5)      C(4)      71.7(8)    1_555 1_555 1_555 yes
   Ru(1)     C(5)      C(6)      70.8(7)    1_555 1_555 1_555 yes
   Ru(1)     C(5)      C(10)     125.2(10)  1_555 1_555 1_555 yes
   C(4)      C(5)      C(6)      107(1)     1_555 1_555 1_555 yes
   C(4)      C(5)      C(10)     126(2)     1_555 1_555 1_555 yes
   C(6)      C(5)      C(10)     125(2)     1_555 1_555 1_555 yes
   Ru(1)     C(6)      C(5)      71.1(7)    1_555 1_555 1_555 yes
   Ru(1)     C(6)      C(7)      70.3(7)    1_555 1_555 1_555 yes
   Ru(1)     C(6)      C(11)     125.0(9)   1_555 1_555 1_555 yes
   C(5)      C(6)      C(7)      105(1)     1_555 1_555 1_555 yes
   C(5)      C(6)      C(11)     132(2)     1_555 1_555 1_555 yes
   C(7)      C(6)      C(11)     121(2)     1_555 1_555 1_555 yes
   Ru(1)     C(7)      C(6)      71.6(7)    1_555 1_555 1_555 yes
   Ru(1)     C(7)      C(8)      70.0(8)    1_555 1_555 1_555 yes
   Ru(1)     C(7)      C(12)     125(1)     1_555 1_555 1_555 yes
   C(6)      C(7)      C(8)      107(1)     1_555 1_555 1_555 yes
   C(6)      C(7)      C(12)     130(2)     1_555 1_555 1_555 yes
   C(8)      C(7)      C(12)     121(3)     1_555 1_555 1_555 yes
   Ru(1)     C(8)      C(4)      73.7(9)    1_555 1_555 1_555 yes
   Ru(1)     C(8)      C(7)      72.2(9)    1_555 1_555 1_555 yes
   Ru(1)     C(8)      C(13)     125(1)     1_555 1_555 1_555 yes
   C(4)      C(8)      C(7)      108(1)     1_555 1_555 1_555 yes
   C(4)      C(8)      C(13)     120(2)     1_555 1_555 1_555 yes
   C(7)      C(8)      C(13)     130(2)     1_555 1_555 1_555 yes
   C(4)      C(9)      H(8)      109(1)     1_555 1_555 1_555 no
   C(4)      C(9)      H(9)      109(2)     1_555 1_555 1_555 no
   C(4)      C(9)      H(10)     109(1)     1_555 1_555 1_555 no
   H(8)      C(9)      H(9)      109(2)     1_555 1_555 1_555 no
   H(8)      C(9)      H(10)     109(3)     1_555 1_555 1_555 no
   H(9)      C(9)      H(10)     109(1)     1_555 1_555 1_555 no
   C(5)      C(10)     H(11)     109(2)     1_555 1_555 1_555 no
   C(5)      C(10)     H(12)     109(1)     1_555 1_555 1_555 no
   C(5)      C(10)     H(13)     109(1)     1_555 1_555 1_555 no
   H(11)     C(10)     H(12)     109(2)     1_555 1_555 1_555 no
   H(11)     C(10)     H(13)     109(1)     1_555 1_555 1_555 no
   H(12)     C(10)     H(13)     109(2)     1_555 1_555 1_555 no
   C(6)      C(11)     H(14)     109(1)     1_555 1_555 1_555 no
   C(6)      C(11)     H(15)     109(2)     1_555 1_555 1_555 no
   C(6)      C(11)     H(16)     109(1)     1_555 1_555 1_555 no
   H(14)     C(11)     H(15)     109(1)     1_555 1_555 1_555 no
   H(14)     C(11)     H(16)     109(3)     1_555 1_555 1_555 no
   H(15)     C(11)     H(16)     109(2)     1_555 1_555 1_555 no
   C(7)      C(12)     H(17)     109(2)     1_555 1_555 1_555 no
   C(7)      C(12)     H(18)     109(1)     1_555 1_555 1_555 no
   C(7)      C(12)     H(19)     109(2)     1_555 1_555 1_555 no
   H(17)     C(12)     H(18)     109(3)     1_555 1_555 1_555 no
   H(17)     C(12)     H(19)     109(2)     1_555 1_555 1_555 no
   H(18)     C(12)     H(19)     109(2)     1_555 1_555 1_555 no
   C(8)      C(13)     H(20)     109(2)     1_555 1_555 1_555 no
   C(8)      C(13)     H(21)     109(1)     1_555 1_555 1_555 no
   C(8)      C(13)     H(22)     109(2)     1_555 1_555 1_555 no
   H(20)     C(13)     H(21)     109(3)     1_555 1_555 1_555 no
   H(20)     C(13)     H(22)     109(2)     1_555 1_555 1_555 no
   H(21)     C(13)     H(22)     109(2)     1_555 1_555 1_555 no
   Ru(2)     C(14)     C(15)     71.7(6)    1_555 1_555 1_555 yes
   Ru(2)     C(14)     C(18)     70.9(6)    1_555 1_555 1_555 yes
   Ru(2)     C(14)     C(19)     127.5(8)   1_555 1_555 1_555 yes
   C(15)     C(14)     C(18)     109(1)     1_555 1_555 1_555 yes
   C(15)     C(14)     C(19)     124(1)     1_555 1_555 1_555 yes
   C(18)     C(14)     C(19)     126(1)     1_555 1_555 1_555 yes
   Ru(2)     C(15)     C(14)     71.4(6)    1_555 1_555 1_555 yes
   Ru(2)     C(15)     C(16)     68.6(6)    1_555 1_555 1_555 yes
   Ru(2)     C(15)     C(20)     125.9(8)   1_555 1_555 1_555 yes
   C(14)     C(15)     C(16)     108(1)     1_555 1_555 1_555 yes
   C(14)     C(15)     C(20)     126(1)     1_555 1_555 1_555 yes
   C(16)     C(15)     C(20)     125(1)     1_555 1_555 1_555 yes
   Ru(2)     C(16)     C(15)     74.0(6)    1_555 1_555 1_555 yes
   Ru(2)     C(16)     C(17)     70.2(6)    1_555 1_555 1_555 yes
   Ru(2)     C(16)     C(21)     126.2(9)   1_555 1_555 1_555 yes
   C(15)     C(16)     C(17)     108(1)     1_555 1_555 1_555 yes
   C(15)     C(16)     C(21)     126(1)     1_555 1_555 1_555 yes
   C(17)     C(16)     C(21)     124(1)     1_555 1_555 1_555 yes
   Ru(2)     C(17)     C(16)     71.0(7)    1_555 1_555 1_555 yes
   Ru(2)     C(17)     C(18)     72.8(7)    1_555 1_555 1_555 yes
   Ru(2)     C(17)     C(22)     123.9(9)   1_555 1_555 1_555 yes
   C(16)     C(17)     C(18)     106(1)     1_555 1_555 1_555 yes
   C(16)     C(17)     C(22)     128(1)     1_555 1_555 1_555 yes
   C(18)     C(17)     C(22)     125(1)     1_555 1_555 1_555 yes
   Ru(2)     C(18)     C(14)     72.3(6)    1_555 1_555 1_555 yes
   Ru(2)     C(18)     C(17)     68.5(6)    1_555 1_555 1_555 yes
   Ru(2)     C(18)     C(23)     125.8(8)   1_555 1_555 1_555 yes
   C(14)     C(18)     C(17)     107(1)     1_555 1_555 1_555 yes
   C(14)     C(18)     C(23)     125(1)     1_555 1_555 1_555 yes
   C(17)     C(18)     C(23)     126(1)     1_555 1_555 1_555 yes
   C(14)     C(19)     H(23)     109(1)     1_555 1_555 1_555 no
   C(14)     C(19)     H(24)     109(1)     1_555 1_555 1_555 no
   C(14)     C(19)     H(25)     109(1)     1_555 1_555 1_555 no
   H(23)     C(19)     H(24)     109(1)     1_555 1_555 1_555 no
   H(23)     C(19)     H(25)     109(1)     1_555 1_555 1_555 no
   H(24)     C(19)     H(25)     109(1)     1_555 1_555 1_555 no
   C(15)     C(20)     H(26)     109(1)     1_555 1_555 1_555 no
   C(15)     C(20)     H(27)     109(1)     1_555 1_555 1_555 no
   C(15)     C(20)     H(28)     109(1)     1_555 1_555 1_555 no
   H(26)     C(20)     H(27)     109(1)     1_555 1_555 1_555 no
   H(26)     C(20)     H(28)     109(1)     1_555 1_555 1_555 no
   H(27)     C(20)     H(28)     109(1)     1_555 1_555 1_555 no
   C(16)     C(21)     H(29)     109(1)     1_555 1_555 1_555 no
   C(16)     C(21)     H(30)     109(1)     1_555 1_555 1_555 no
   C(16)     C(21)     H(31)     109(1)     1_555 1_555 1_555 no
   H(29)     C(21)     H(30)     109(1)     1_555 1_555 1_555 no
   H(29)     C(21)     H(31)     109(1)     1_555 1_555 1_555 no
   H(30)     C(21)     H(31)     109(1)     1_555 1_555 1_555 no
   C(17)     C(22)     H(32)     109(1)     1_555 1_555 1_555 no
   C(17)     C(22)     H(33)     109(1)     1_555 1_555 1_555 no
   C(17)     C(22)     H(34)     109(1)     1_555 1_555 1_555 no
   H(32)     C(22)     H(33)     109(1)     1_555 1_555 1_555 no
   H(32)     C(22)     H(34)     109(2)     1_555 1_555 1_555 no
   H(33)     C(22)     H(34)     109(1)     1_555 1_555 1_555 no
   C(18)     C(23)     H(35)     109(1)     1_555 1_555 1_555 no
   C(18)     C(23)     H(36)     109(1)     1_555 1_555 1_555 no
   C(18)     C(23)     H(37)     109(1)     1_555 1_555 1_555 no
   H(35)     C(23)     H(36)     109(1)     1_555 1_555 1_555 no
   H(35)     C(23)     H(37)     109(1)     1_555 1_555 1_555 no
   H(36)     C(23)     H(37)     109(1)     1_555 1_555 1_555 no
   P(1)      C(24)     C(25)     124.0(9)   1_555 1_555 1_555 yes
   P(1)      C(24)     C(29)     119.1(8)   1_555 1_555 1_555 yes
   C(25)     C(24)     C(29)     116.7(10)  1_555 1_555 1_555 yes
   C(24)     C(25)     C(26)     120(1)     1_555 1_555 1_555 yes
   C(24)     C(25)     H(38)     119(1)     1_555 1_555 1_555 no
   C(26)     C(25)     H(38)     119(1)     1_555 1_555 1_555 no
   C(25)     C(26)     C(27)     121(1)     1_555 1_555 1_555 yes
   C(25)     C(26)     H(39)     119(1)     1_555 1_555 1_555 no
   C(27)     C(26)     H(39)     119(1)     1_555 1_555 1_555 no
   C(26)     C(27)     C(28)     119(1)     1_555 1_555 1_555 yes
   C(26)     C(27)     H(40)     120(1)     1_555 1_555 1_555 no
   C(28)     C(27)     H(40)     120(1)     1_555 1_555 1_555 no
   C(27)     C(28)     C(29)     119(1)     1_555 1_555 1_555 yes
   C(27)     C(28)     H(41)     120(1)     1_555 1_555 1_555 no
   C(29)     C(28)     H(41)     120(1)     1_555 1_555 1_555 no
   C(24)     C(29)     C(28)     122(1)     1_555 1_555 1_555 yes
   C(24)     C(29)     H(42)     118(1)     1_555 1_555 1_555 no
   C(28)     C(29)     H(42)     118(1)     1_555 1_555 1_555 no
   P(1)      C(30)     C(31)     122.2(9)   1_555 1_555 1_555 yes
   P(1)      C(30)     C(35)     118.3(9)   1_555 1_555 1_555 yes
   C(31)     C(30)     C(35)     119(1)     1_555 1_555 1_555 yes
   C(30)     C(31)     C(32)     120(1)     1_555 1_555 1_555 yes
   C(30)     C(31)     H(43)     119(1)     1_555 1_555 1_555 no
   C(32)     C(31)     H(43)     119(1)     1_555 1_555 1_555 no
   C(31)     C(32)     C(33)     120(1)     1_555 1_555 1_555 yes
   C(31)     C(32)     H(44)     119(1)     1_555 1_555 1_555 no
   C(33)     C(32)     H(44)     119(1)     1_555 1_555 1_555 no
   C(32)     C(33)     C(34)     120(1)     1_555 1_555 1_555 yes
   C(32)     C(33)     H(45)     119(2)     1_555 1_555 1_555 no
   C(34)     C(33)     H(45)     119(2)     1_555 1_555 1_555 no
   C(33)     C(34)     C(35)     119(1)     1_555 1_555 1_555 yes
   C(33)     C(34)     H(46)     120(1)     1_555 1_555 1_555 no
   C(35)     C(34)     H(46)     120(1)     1_555 1_555 1_555 no
   C(30)     C(35)     C(34)     119(1)     1_555 1_555 1_555 yes
   C(30)     C(35)     H(47)     120(1)     1_555 1_555 1_555 no
   C(34)     C(35)     H(47)     120(1)     1_555 1_555 1_555 no
   P(1)      C(36)     C(37)     117.6(8)   1_555 1_555 1_555 yes
   P(1)      C(36)     C(41)     123.2(9)   1_555 1_555 1_555 yes
   C(37)     C(36)     C(41)     119(1)     1_555 1_555 1_555 yes
   C(36)     C(37)     C(38)     120(1)     1_555 1_555 1_555 yes
   C(36)     C(37)     H(48)     119(1)     1_555 1_555 1_555 no
   C(38)     C(37)     H(48)     119(1)     1_555 1_555 1_555 no
   C(37)     C(38)     C(39)     120(1)     1_555 1_555 1_555 yes
   C(37)     C(38)     H(49)     119(1)     1_555 1_555 1_555 no
   C(39)     C(38)     H(49)     119(1)     1_555 1_555 1_555 no
   C(38)     C(39)     C(40)     120(1)     1_555 1_555 1_555 yes
   C(38)     C(39)     H(50)     119(1)     1_555 1_555 1_555 no
   C(40)     C(39)     H(50)     119(1)     1_555 1_555 1_555 no
   C(39)     C(40)     C(41)     120(1)     1_555 1_555 1_555 yes
   C(39)     C(40)     H(51)     119(1)     1_555 1_555 1_555 no
   C(41)     C(40)     H(51)     119(1)     1_555 1_555 1_555 no
   C(36)     C(41)     C(40)     118(1)     1_555 1_555 1_555 yes
   C(36)     C(41)     H(52)     120(1)     1_555 1_555 1_555 no
   C(40)     C(41)     H(52)     120(1)     1_555 1_555 1_555 no
#------------------------------------------------------------------------------
loop_
_geom_torsion_atom_site_label_1
_geom_torsion_atom_site_label_2
_geom_torsion_atom_site_label_3
_geom_torsion_atom_site_label_4
_geom_torsion
_geom_torsion_site_symmetry_1
_geom_torsion_site_symmetry_2
_geom_torsion_site_symmetry_3
_geom_torsion_site_symmetry_4
_geom_torsion_publ_flag
   Pd(1)   Pd(2)   Ru(1)   Ru(2)   74.53(3) 1_555 1_555 1_555 1_555 yes
   Pd(1)   Pd(2)   Ru(1)   S(1)    28.94(7) 1_555 1_555 1_555 1_555 yes
   Pd(1)   Pd(2)   Ru(1)   S(2)    141.72(10) 1_555 1_555 1_555 1_555 yes
   Pd(1)   Pd(2)   Ru(1)   C(4)    -72.8(10) 1_555 1_555 1_555 1_555 yes
   Pd(1)   Pd(2)   Ru(1)   C(5)    -78.8(4) 1_555 1_555 1_555 1_555 yes
   Pd(1)   Pd(2)   Ru(1)   C(6)    -114.0(6) 1_555 1_555 1_555 1_555 yes
   Pd(1)   Pd(2)   Ru(1)   C(7)    -149.5(7) 1_555 1_555 1_555 1_555 yes
   Pd(1)   Pd(2)   Ru(1)   C(8)    -157(1)  1_555 1_555 1_555 1_555 yes
   Pd(1)   Pd(2)   Ru(2)   Ru(1)   -76.74(3) 1_555 1_555 1_555 1_555 yes
   Pd(1)   Pd(2)   Ru(2)   S(1)    -30.72(7) 1_555 1_555 1_555 1_555 yes
   Pd(1)   Pd(2)   Ru(2)   S(2)    -139.49(10) 1_555 1_555 1_555 1_555 yes
   Pd(1)   Pd(2)   Ru(2)   C(14)   94.5(3)  1_555 1_555 1_555 1_555 yes
   Pd(1)   Pd(2)   Ru(2)   C(15)   71.0(4)  1_555 1_555 1_555 1_555 yes
   Pd(1)   Pd(2)   Ru(2)   C(16)   118(1)   1_555 1_555 1_555 1_555 yes
   Pd(1)   Pd(2)   Ru(2)   C(17)   159.8(5) 1_555 1_555 1_555 1_555 yes
   Pd(1)   Pd(2)   Ru(2)   C(18)   131.9(4) 1_555 1_555 1_555 1_555 yes
   Pd(1)   Pd(2)   S(2)    Ru(1)   -35.30(8) 1_555 1_555 1_555 1_555 yes
   Pd(1)   Pd(2)   S(2)    Ru(2)   36.86(8) 1_555 1_555 1_555 1_555 yes
   Pd(1)   Pd(2)   S(3)    C(1)    115.4(6) 1_555 1_555 1_555 1_555 yes
   Pd(1)   Ru(1)   Pd(2)   Ru(2)   -74.53(3) 1_555 1_555 1_555 1_555 yes
   Pd(1)   Ru(1)   Pd(2)   Br(1)   152.61(7) 1_555 1_555 1_555 1_555 yes
   Pd(1)   Ru(1)   Pd(2)   S(2)    -141.72(10) 1_555 1_555 1_555 1_555 yes
   Pd(1)   Ru(1)   Pd(2)   S(3)    15.71(9) 1_555 1_555 1_555 1_555 yes
   Pd(1)   Ru(1)   Ru(2)   Pd(2)   63.34(3) 1_555 1_555 1_555 1_555 yes
   Pd(1)   Ru(1)   Ru(2)   S(1)    -55.55(9) 1_555 1_555 1_555 1_555 yes
   Pd(1)   Ru(1)   Ru(2)   S(2)    121.38(9) 1_555 1_555 1_555 1_555 yes
   Pd(1)   Ru(1)   Ru(2)   C(14)   27(1)    1_555 1_555 1_555 1_555 yes
   Pd(1)   Ru(1)   Ru(2)   C(15)   -70.0(6) 1_555 1_555 1_555 1_555 yes
   Pd(1)   Ru(1)   Ru(2)   C(16)   -122.5(5) 1_555 1_555 1_555 1_555 yes
   Pd(1)   Ru(1)   Ru(2)   C(17)   -174.2(6) 1_555 1_555 1_555 1_555 yes
   Pd(1)   Ru(1)   Ru(2)   C(18)   130.8(8) 1_555 1_555 1_555 1_555 yes
   Pd(1)   Ru(1)   S(1)    Ru(2)   82.24(8) 1_555 1_555 1_555 1_555 yes
   Pd(1)   Ru(1)   S(2)    Pd(2)   30.51(7) 1_555 1_555 1_555 1_555 yes
   Pd(1)   Ru(1)   S(2)    Ru(2)   -48.98(6) 1_555 1_555 1_555 1_555 yes
   Pd(1)   Ru(1)   C(4)    C(5)    -67(1)   1_555 1_555 1_555 1_555 yes
   Pd(1)   Ru(1)   C(4)    C(8)    171(1)   1_555 1_555 1_555 1_555 yes
   Pd(1)   Ru(1)   C(4)    C(9)    46(2)    1_555 1_555 1_555 1_555 yes
   Pd(1)   Ru(1)   C(5)    C(4)    121(1)   1_555 1_555 1_555 1_555 yes
   Pd(1)   Ru(1)   C(5)    C(6)    -121.3(10) 1_555 1_555 1_555 1_555 yes
   Pd(1)   Ru(1)   C(5)    C(10)   0(2)     1_555 1_555 1_555 1_555 yes
   Pd(1)   Ru(1)   C(6)    C(5)    68.4(10) 1_555 1_555 1_555 1_555 yes
   Pd(1)   Ru(1)   C(6)    C(7)    -176.7(10) 1_555 1_555 1_555 1_555 yes
   Pd(1)   Ru(1)   C(6)    C(11)   -61(2)   1_555 1_555 1_555 1_555 yes
   Pd(1)   Ru(1)   C(7)    C(6)    6(1)     1_555 1_555 1_555 1_555 yes
   Pd(1)   Ru(1)   C(7)    C(8)    123(1)   1_555 1_555 1_555 1_555 yes
   Pd(1)   Ru(1)   C(7)    C(12)   -120(2)  1_555 1_555 1_555 1_555 yes
   Pd(1)   Ru(1)   C(8)    C(4)    -14(1)   1_555 1_555 1_555 1_555 yes
   Pd(1)   Ru(1)   C(8)    C(7)    -130(1)  1_555 1_555 1_555 1_555 yes
   Pd(1)   Ru(1)   C(8)    C(13)   101(2)   1_555 1_555 1_555 1_555 yes
   Pd(1)   Ru(2)   Pd(2)   Ru(1)   76.74(3) 1_555 1_555 1_555 1_555 yes
   Pd(1)   Ru(2)   Pd(2)   Br(1)   -178.85(9) 1_555 1_555 1_555 1_555 yes
   Pd(1)   Ru(2)   Pd(2)   S(2)    139.49(10) 1_555 1_555 1_555 1_555 yes
   Pd(1)   Ru(2)   Pd(2)   S(3)    -33.99(8) 1_555 1_555 1_555 1_555 yes
   Pd(1)   Ru(2)   Ru(1)   Pd(2)   -63.34(3) 1_555 1_555 1_555 1_555 yes
   Pd(1)   Ru(2)   Ru(1)   S(1)    55.55(9) 1_555 1_555 1_555 1_555 yes
   Pd(1)   Ru(2)   Ru(1)   S(2)    -121.38(9) 1_555 1_555 1_555 1_555 yes
   Pd(1)   Ru(2)   Ru(1)   C(4)    92(1)    1_555 1_555 1_555 1_555 yes
   Pd(1)   Ru(2)   Ru(1)   C(5)    24(1)    1_555 1_555 1_555 1_555 yes
   Pd(1)   Ru(2)   Ru(1)   C(6)    -85(1)   1_555 1_555 1_555 1_555 yes
   Pd(1)   Ru(2)   Ru(1)   C(7)    -158(1)  1_555 1_555 1_555 1_555 yes
   Pd(1)   Ru(2)   Ru(1)   C(8)    145(1)   1_555 1_555 1_555 1_555 yes
   Pd(1)   Ru(2)   S(1)    Ru(1)   -88.29(8) 1_555 1_555 1_555 1_555 yes
   Pd(1)   Ru(2)   S(2)    Pd(2)   -33.68(7) 1_555 1_555 1_555 1_555 yes
   Pd(1)   Ru(2)   S(2)    Ru(1)   52.55(7) 1_555 1_555 1_555 1_555 yes
   Pd(1)   Ru(2)   C(14)   C(15)   -92.3(7) 1_555 1_555 1_555 1_555 yes
   Pd(1)   Ru(2)   C(14)   C(18)   149.1(7) 1_555 1_555 1_555 1_555 yes
   Pd(1)   Ru(2)   C(14)   C(19)   27(1)    1_555 1_555 1_555 1_555 yes
   Pd(1)   Ru(2)   C(15)   C(14)   94.3(7)  1_555 1_555 1_555 1_555 yes
   Pd(1)   Ru(2)   C(15)   C(16)   -146.8(6) 1_555 1_555 1_555 1_555 yes
   Pd(1)   Ru(2)   C(15)   C(20)   -27(1)   1_555 1_555 1_555 1_555 yes
   Pd(1)   Ru(2)   C(16)   C(15)   44.2(8)  1_555 1_555 1_555 1_555 yes
   Pd(1)   Ru(2)   C(16)   C(17)   161.2(7) 1_555 1_555 1_555 1_555 yes
   Pd(1)   Ru(2)   C(16)   C(21)   -80(1)   1_555 1_555 1_555 1_555 yes
   Pd(1)   Ru(2)   C(17)   C(16)   -54(1)   1_555 1_555 1_555 1_555 yes
   Pd(1)   Ru(2)   C(17)   C(18)   59(1)    1_555 1_555 1_555 1_555 yes
   Pd(1)   Ru(2)   C(17)   C(22)   -179(1)  1_555 1_555 1_555 1_555 yes
   Pd(1)   Ru(2)   C(18)   C(14)   -41.5(8) 1_555 1_555 1_555 1_555 yes
   Pd(1)   Ru(2)   C(18)   C(17)   -159.8(6) 1_555 1_555 1_555 1_555 yes
   Pd(1)   Ru(2)   C(18)   C(23)   79(1)    1_555 1_555 1_555 1_555 yes
   Pd(1)   S(1)    Ru(1)   Pd(2)   -32.63(7) 1_555 1_555 1_555 1_555 yes
   Pd(1)   S(1)    Ru(1)   Ru(2)   -82.24(8) 1_555 1_555 1_555 1_555 yes
   Pd(1)   S(1)    Ru(1)   S(2)    -79.6(1) 1_555 1_555 1_555 1_555 yes
   Pd(1)   S(1)    Ru(1)   C(4)    120.2(6) 1_555 1_555 1_555 1_555 yes
   Pd(1)   S(1)    Ru(1)   C(5)    85.5(5)  1_555 1_555 1_555 1_555 yes
   Pd(1)   S(1)    Ru(1)   C(6)    74.2(6)  1_555 1_555 1_555 1_555 yes
   Pd(1)   S(1)    Ru(1)   C(7)    144(1)   1_555 1_555 1_555 1_555 yes
   Pd(1)   S(1)    Ru(1)   C(8)    150.6(6) 1_555 1_555 1_555 1_555 yes
   Pd(1)   S(1)    Ru(2)   Pd(2)   34.65(7) 1_555 1_555 1_555 1_555 yes
   Pd(1)   S(1)    Ru(2)   Ru(1)   88.29(8) 1_555 1_555 1_555 1_555 yes
   Pd(1)   S(1)    Ru(2)   S(2)    85.7(1)  1_555 1_555 1_555 1_555 yes
   Pd(1)   S(1)    Ru(2)   C(14)   -74.4(4) 1_555 1_555 1_555 1_555 yes
   Pd(1)   S(1)    Ru(2)   C(15)   -99.4(3) 1_555 1_555 1_555 1_555 yes
   Pd(1)   S(1)    Ru(2)   C(16)   -136.8(3) 1_555 1_555 1_555 1_555 yes
   Pd(1)   S(1)    Ru(2)   C(17)   -156.3(5) 1_555 1_555 1_555 1_555 yes
   Pd(1)   S(1)    Ru(2)   C(18)   -99(1)   1_555 1_555 1_555 1_555 yes
   Pd(1)   S(3)    Pd(2)   Ru(1)   -17.8(1) 1_555 1_555 1_555 1_555 yes
   Pd(1)   S(3)    Pd(2)   Ru(2)   38.75(8) 1_555 1_555 1_555 1_555 yes
   Pd(1)   S(3)    Pd(2)   Br(1)   -162.75(7) 1_555 1_555 1_555 1_555 yes
   Pd(1)   S(3)    Pd(2)   S(2)    26.4(3)  1_555 1_555 1_555 1_555 yes
   Pd(1)   S(3)    C(1)    C(2)    -169(2)  1_555 1_555 1_555 1_555 yes
   Pd(1)   S(3)    C(1)    C(3)    45(1)    1_555 1_555 1_555 1_555 yes
   Pd(1)   P(1)    C(24)   C(25)   116.4(10) 1_555 1_555 1_555 1_555 yes
   Pd(1)   P(1)    C(24)   C(29)   -58.8(9) 1_555 1_555 1_555 1_555 yes
   Pd(1)   P(1)    C(30)   C(31)   122.2(9) 1_555 1_555 1_555 1_555 yes
   Pd(1)   P(1)    C(30)   C(35)   -53.4(10) 1_555 1_555 1_555 1_555 yes
   Pd(1)   P(1)    C(36)   C(37)   -47.2(9) 1_555 1_555 1_555 1_555 yes
   Pd(1)   P(1)    C(36)   C(41)   130.6(9) 1_555 1_555 1_555 1_555 yes
   Pd(2)   Pd(1)   Ru(1)   Ru(2)   -72.12(3) 1_555 1_555 1_555 1_555 yes
   Pd(2)   Pd(1)   Ru(1)   S(1)    -138.7(1) 1_555 1_555 1_555 1_555 yes
   Pd(2)   Pd(1)   Ru(1)   S(2)    -27.81(8) 1_555 1_555 1_555 1_555 yes
   Pd(2)   Pd(1)   Ru(1)   C(4)    150.9(5) 1_555 1_555 1_555 1_555 yes
   Pd(2)   Pd(1)   Ru(1)   C(5)    117.6(5) 1_555 1_555 1_555 1_555 yes
   Pd(2)   Pd(1)   Ru(1)   C(6)    82.4(5)  1_555 1_555 1_555 1_555 yes
   Pd(2)   Pd(1)   Ru(1)   C(7)    78.0(10) 1_555 1_555 1_555 1_555 yes
   Pd(2)   Pd(1)   Ru(1)   C(8)    160.5(10) 1_555 1_555 1_555 1_555 yes
   Pd(2)   Pd(1)   Ru(2)   Ru(1)   75.38(3) 1_555 1_555 1_555 1_555 yes
   Pd(2)   Pd(1)   Ru(2)   S(1)    138.00(9) 1_555 1_555 1_555 1_555 yes
   Pd(2)   Pd(1)   Ru(2)   S(2)    30.70(8) 1_555 1_555 1_555 1_555 yes
   Pd(2)   Pd(1)   Ru(2)   C(14)   -97.9(3) 1_555 1_555 1_555 1_555 yes
   Pd(2)   Pd(1)   Ru(2)   C(15)   -135.4(3) 1_555 1_555 1_555 1_555 yes
   Pd(2)   Pd(1)   Ru(2)   C(16)   -160.8(4) 1_555 1_555 1_555 1_555 yes
   Pd(2)   Pd(1)   Ru(2)   C(17)   -119(1)  1_555 1_555 1_555 1_555 yes
   Pd(2)   Pd(1)   Ru(2)   C(18)   -74.1(4) 1_555 1_555 1_555 1_555 yes
   Pd(2)   Pd(1)   S(1)    Ru(1)   35.68(8) 1_555 1_555 1_555 1_555 yes
   Pd(2)   Pd(1)   S(1)    Ru(2)   -35.56(7) 1_555 1_555 1_555 1_555 yes
   Pd(2)   Pd(1)   S(3)    C(1)    -109.2(7) 1_555 1_555 1_555 1_555 yes
   Pd(2)   Pd(1)   P(1)    C(24)   -147.9(4) 1_555 1_555 1_555 1_555 yes
   Pd(2)   Pd(1)   P(1)    C(30)   -24.4(5) 1_555 1_555 1_555 1_555 yes
   Pd(2)   Pd(1)   P(1)    C(36)   92.1(4)  1_555 1_555 1_555 1_555 yes
   Pd(2)   Ru(1)   Pd(1)   Ru(2)   72.12(3) 1_555 1_555 1_555 1_555 yes
   Pd(2)   Ru(1)   Pd(1)   S(1)    138.7(1) 1_555 1_555 1_555 1_555 yes
   Pd(2)   Ru(1)   Pd(1)   S(3)    -15.41(9) 1_555 1_555 1_555 1_555 yes
   Pd(2)   Ru(1)   Pd(1)   P(1)    -165.0(1) 1_555 1_555 1_555 1_555 yes
   Pd(2)   Ru(1)   Ru(2)   S(1)    -118.89(9) 1_555 1_555 1_555 1_555 yes
   Pd(2)   Ru(1)   Ru(2)   S(2)    58.04(9) 1_555 1_555 1_555 1_555 yes
   Pd(2)   Ru(1)   Ru(2)   C(14)   -36(1)   1_555 1_555 1_555 1_555 yes
   Pd(2)   Ru(1)   Ru(2)   C(15)   -133.3(6) 1_555 1_555 1_555 1_555 yes
   Pd(2)   Ru(1)   Ru(2)   C(16)   174.2(5) 1_555 1_555 1_555 1_555 yes
   Pd(2)   Ru(1)   Ru(2)   C(17)   122.5(6) 1_555 1_555 1_555 1_555 yes
   Pd(2)   Ru(1)   Ru(2)   C(18)   67.4(8)  1_555 1_555 1_555 1_555 yes
   Pd(2)   Ru(1)   S(1)    Ru(2)   49.61(6) 1_555 1_555 1_555 1_555 yes
   Pd(2)   Ru(1)   S(2)    Ru(2)   -79.50(8) 1_555 1_555 1_555 1_555 yes
   Pd(2)   Ru(1)   C(4)    C(5)    -9(1)    1_555 1_555 1_555 1_555 yes
   Pd(2)   Ru(1)   C(4)    C(8)    -130(1)  1_555 1_555 1_555 1_555 yes
   Pd(2)   Ru(1)   C(4)    C(9)    104(2)   1_555 1_555 1_555 1_555 yes
   Pd(2)   Ru(1)   C(5)    C(4)    175.2(10) 1_555 1_555 1_555 1_555 yes
   Pd(2)   Ru(1)   C(5)    C(6)    -67.7(10) 1_555 1_555 1_555 1_555 yes
   Pd(2)   Ru(1)   C(5)    C(10)   52(2)    1_555 1_555 1_555 1_555 yes
   Pd(2)   Ru(1)   C(6)    C(5)    123.1(9) 1_555 1_555 1_555 1_555 yes
   Pd(2)   Ru(1)   C(6)    C(7)    -121(1)  1_555 1_555 1_555 1_555 yes
   Pd(2)   Ru(1)   C(6)    C(11)   -6(2)    1_555 1_555 1_555 1_555 yes
   Pd(2)   Ru(1)   C(7)    C(6)    68.7(10) 1_555 1_555 1_555 1_555 yes
   Pd(2)   Ru(1)   C(7)    C(8)    -174(1)  1_555 1_555 1_555 1_555 yes
   Pd(2)   Ru(1)   C(7)    C(12)   -58(3)   1_555 1_555 1_555 1_555 yes
   Pd(2)   Ru(1)   C(8)    C(4)    127(1)   1_555 1_555 1_555 1_555 yes
   Pd(2)   Ru(1)   C(8)    C(7)    11(2)    1_555 1_555 1_555 1_555 yes
   Pd(2)   Ru(1)   C(8)    C(13)   -115(2)  1_555 1_555 1_555 1_555 yes
   Pd(2)   Ru(2)   Pd(1)   Ru(1)   -75.38(3) 1_555 1_555 1_555 1_555 yes
   Pd(2)   Ru(2)   Pd(1)   S(1)    -138.00(9) 1_555 1_555 1_555 1_555 yes
   Pd(2)   Ru(2)   Pd(1)   S(3)    33.71(8) 1_555 1_555 1_555 1_555 yes
   Pd(2)   Ru(2)   Pd(1)   P(1)    165.3(1) 1_555 1_555 1_555 1_555 yes
   Pd(2)   Ru(2)   Ru(1)   S(1)    118.89(9) 1_555 1_555 1_555 1_555 yes
   Pd(2)   Ru(2)   Ru(1)   S(2)    -58.04(9) 1_555 1_555 1_555 1_555 yes
   Pd(2)   Ru(2)   Ru(1)   C(4)    156(1)   1_555 1_555 1_555 1_555 yes
   Pd(2)   Ru(2)   Ru(1)   C(5)    88(1)    1_555 1_555 1_555 1_555 yes
   Pd(2)   Ru(2)   Ru(1)   C(6)    -21(1)   1_555 1_555 1_555 1_555 yes
   Pd(2)   Ru(2)   Ru(1)   C(7)    -94(1)   1_555 1_555 1_555 1_555 yes
   Pd(2)   Ru(2)   Ru(1)   C(8)    -150(1)  1_555 1_555 1_555 1_555 yes
   Pd(2)   Ru(2)   S(1)    Ru(1)   -53.65(6) 1_555 1_555 1_555 1_555 yes
   Pd(2)   Ru(2)   S(2)    Ru(1)   86.24(8) 1_555 1_555 1_555 1_555 yes
   Pd(2)   Ru(2)   C(14)   C(15)   -151.0(6) 1_555 1_555 1_555 1_555 yes
   Pd(2)   Ru(2)   C(14)   C(18)   90.5(7)  1_555 1_555 1_555 1_555 yes
   Pd(2)   Ru(2)   C(14)   C(19)   -31(1)   1_555 1_555 1_555 1_555 yes
   Pd(2)   Ru(2)   C(15)   C(14)   40.4(8)  1_555 1_555 1_555 1_555 yes
   Pd(2)   Ru(2)   C(15)   C(16)   159.3(6) 1_555 1_555 1_555 1_555 yes
   Pd(2)   Ru(2)   C(15)   C(20)   -81(1)   1_555 1_555 1_555 1_555 yes
   Pd(2)   Ru(2)   C(16)   C(15)   -63(1)   1_555 1_555 1_555 1_555 yes
   Pd(2)   Ru(2)   C(16)   C(17)   53(1)    1_555 1_555 1_555 1_555 yes
   Pd(2)   Ru(2)   C(16)   C(21)   172(1)   1_555 1_555 1_555 1_555 yes
   Pd(2)   Ru(2)   C(17)   C(16)   -162.3(5) 1_555 1_555 1_555 1_555 yes
   Pd(2)   Ru(2)   C(17)   C(18)   -47.4(8) 1_555 1_555 1_555 1_555 yes
   Pd(2)   Ru(2)   C(17)   C(22)   73(1)    1_555 1_555 1_555 1_555 yes
   Pd(2)   Ru(2)   C(18)   C(14)   -96.9(7) 1_555 1_555 1_555 1_555 yes
   Pd(2)   Ru(2)   C(18)   C(17)   144.9(7) 1_555 1_555 1_555 1_555 yes
   Pd(2)   Ru(2)   C(18)   C(23)   24(1)    1_555 1_555 1_555 1_555 yes
   Pd(2)   S(2)    Ru(1)   Ru(2)   79.50(8) 1_555 1_555 1_555 1_555 yes
   Pd(2)   S(2)    Ru(1)   S(1)    76.8(1)  1_555 1_555 1_555 1_555 yes
   Pd(2)   S(2)    Ru(1)   C(4)    -147.1(9) 1_555 1_555 1_555 1_555 yes
   Pd(2)   S(2)    Ru(1)   C(5)    -78.3(7) 1_555 1_555 1_555 1_555 yes
   Pd(2)   S(2)    Ru(1)   C(6)    -86.5(5) 1_555 1_555 1_555 1_555 yes
   Pd(2)   S(2)    Ru(1)   C(7)    -122.7(8) 1_555 1_555 1_555 1_555 yes
   Pd(2)   S(2)    Ru(1)   C(8)    -154.2(6) 1_555 1_555 1_555 1_555 yes
   Pd(2)   S(2)    Ru(2)   Ru(1)   -86.24(8) 1_555 1_555 1_555 1_555 yes
   Pd(2)   S(2)    Ru(2)   S(1)    -83.6(1) 1_555 1_555 1_555 1_555 yes
   Pd(2)   S(2)    Ru(2)   C(14)   75.7(4)  1_555 1_555 1_555 1_555 yes
   Pd(2)   S(2)    Ru(2)   C(15)   109.3(8) 1_555 1_555 1_555 1_555 yes
   Pd(2)   S(2)    Ru(2)   C(16)   158.1(4) 1_555 1_555 1_555 1_555 yes
   Pd(2)   S(2)    Ru(2)   C(17)   137.5(5) 1_555 1_555 1_555 1_555 yes
   Pd(2)   S(2)    Ru(2)   C(18)   98.6(4)  1_555 1_555 1_555 1_555 yes
   Pd(2)   S(3)    Pd(1)   Ru(1)   16.80(10) 1_555 1_555 1_555 1_555 yes
   Pd(2)   S(3)    Pd(1)   Ru(2)   -36.42(8) 1_555 1_555 1_555 1_555 yes
   Pd(2)   S(3)    Pd(1)   S(1)    -23.6(2) 1_555 1_555 1_555 1_555 yes
   Pd(2)   S(3)    Pd(1)   P(1)    175.20(9) 1_555 1_555 1_555 1_555 yes
   Pd(2)   S(3)    C(1)    C(2)    106(2)   1_555 1_555 1_555 1_555 yes
   Pd(2)   S(3)    C(1)    C(3)    -38(1)   1_555 1_555 1_555 1_555 yes
   Ru(1)   Pd(1)   Pd(2)   Ru(2)   60.48(3) 1_555 1_555 1_555 1_555 yes
   Ru(1)   Pd(1)   Pd(2)   Br(1)   -121.1(1) 1_555 1_555 1_555 1_555 yes
   Ru(1)   Pd(1)   Pd(2)   S(2)    28.85(8) 1_555 1_555 1_555 1_555 yes
   Ru(1)   Pd(1)   Pd(2)   S(3)    -162.1(1) 1_555 1_555 1_555 1_555 yes
   Ru(1)   Pd(1)   Ru(2)   S(1)    62.61(9) 1_555 1_555 1_555 1_555 yes
   Ru(1)   Pd(1)   Ru(2)   S(2)    -44.68(8) 1_555 1_555 1_555 1_555 yes
   Ru(1)   Pd(1)   Ru(2)   C(14)   -173.3(3) 1_555 1_555 1_555 1_555 yes
   Ru(1)   Pd(1)   Ru(2)   C(15)   149.2(3) 1_555 1_555 1_555 1_555 yes
   Ru(1)   Pd(1)   Ru(2)   C(16)   123.8(4) 1_555 1_555 1_555 1_555 yes
   Ru(1)   Pd(1)   Ru(2)   C(17)   165(1)   1_555 1_555 1_555 1_555 yes
   Ru(1)   Pd(1)   Ru(2)   C(18)   -149.5(4) 1_555 1_555 1_555 1_555 yes
   Ru(1)   Pd(1)   S(1)    Ru(2)   -71.23(8) 1_555 1_555 1_555 1_555 yes
   Ru(1)   Pd(1)   S(3)    C(1)    -92.4(7) 1_555 1_555 1_555 1_555 yes
   Ru(1)   Pd(1)   P(1)    C(24)   -8.3(4)  1_555 1_555 1_555 1_555 yes
   Ru(1)   Pd(1)   P(1)    C(30)   115.2(4) 1_555 1_555 1_555 1_555 yes
   Ru(1)   Pd(1)   P(1)    C(36)   -128.4(4) 1_555 1_555 1_555 1_555 yes
   Ru(1)   Pd(2)   Pd(1)   Ru(2)   -60.48(3) 1_555 1_555 1_555 1_555 yes
   Ru(1)   Pd(2)   Pd(1)   S(1)    -29.46(7) 1_555 1_555 1_555 1_555 yes
   Ru(1)   Pd(2)   Pd(1)   S(3)    162.1(1) 1_555 1_555 1_555 1_555 yes
   Ru(1)   Pd(2)   Pd(1)   P(1)    148.8(2) 1_555 1_555 1_555 1_555 yes
   Ru(1)   Pd(2)   Ru(2)   S(1)    46.03(7) 1_555 1_555 1_555 1_555 yes
   Ru(1)   Pd(2)   Ru(2)   S(2)    -62.75(9) 1_555 1_555 1_555 1_555 yes
   Ru(1)   Pd(2)   Ru(2)   C(14)   171.2(3) 1_555 1_555 1_555 1_555 yes
   Ru(1)   Pd(2)   Ru(2)   C(15)   147.7(4) 1_555 1_555 1_555 1_555 yes
   Ru(1)   Pd(2)   Ru(2)   C(16)   -164(1)  1_555 1_555 1_555 1_555 yes
   Ru(1)   Pd(2)   Ru(2)   C(17)   -123.5(5) 1_555 1_555 1_555 1_555 yes
   Ru(1)   Pd(2)   Ru(2)   C(18)   -151.4(4) 1_555 1_555 1_555 1_555 yes
   Ru(1)   Pd(2)   S(2)    Ru(2)   72.16(7) 1_555 1_555 1_555 1_555 yes
   Ru(1)   Pd(2)   S(3)    C(1)    97.5(6)  1_555 1_555 1_555 1_555 yes
   Ru(1)   Ru(2)   Pd(1)   S(1)    -62.61(9) 1_555 1_555 1_555 1_555 yes
   Ru(1)   Ru(2)   Pd(1)   S(3)    109.09(9) 1_555 1_555 1_555 1_555 yes
   Ru(1)   Ru(2)   Pd(1)   P(1)    -119.3(1) 1_555 1_555 1_555 1_555 yes
   Ru(1)   Ru(2)   Pd(2)   Br(1)   104.41(8) 1_555 1_555 1_555 1_555 yes
   Ru(1)   Ru(2)   Pd(2)   S(2)    62.75(9) 1_555 1_555 1_555 1_555 yes
   Ru(1)   Ru(2)   Pd(2)   S(3)    -110.73(9) 1_555 1_555 1_555 1_555 yes
   Ru(1)   Ru(2)   C(14)   C(15)   -117(1)  1_555 1_555 1_555 1_555 yes
   Ru(1)   Ru(2)   C(14)   C(18)   123(1)   1_555 1_555 1_555 1_555 yes
   Ru(1)   Ru(2)   C(14)   C(19)   2(2)     1_555 1_555 1_555 1_555 yes
   Ru(1)   Ru(2)   C(15)   C(14)   155.3(6) 1_555 1_555 1_555 1_555 yes
   Ru(1)   Ru(2)   C(15)   C(16)   -85.8(8) 1_555 1_555 1_555 1_555 yes
   Ru(1)   Ru(2)   C(15)   C(20)   33(1)    1_555 1_555 1_555 1_555 yes
   Ru(1)   Ru(2)   C(16)   C(15)   135.4(6) 1_555 1_555 1_555 1_555 yes
   Ru(1)   Ru(2)   C(16)   C(17)   -107.6(7) 1_555 1_555 1_555 1_555 yes
   Ru(1)   Ru(2)   C(16)   C(21)   11(1)    1_555 1_555 1_555 1_555 yes
   Ru(1)   Ru(2)   C(17)   C(16)   107.2(6) 1_555 1_555 1_555 1_555 yes
   Ru(1)   Ru(2)   C(17)   C(18)   -137.9(6) 1_555 1_555 1_555 1_555 yes
   Ru(1)   Ru(2)   C(17)   C(22)   -16(1)   1_555 1_555 1_555 1_555 yes
   Ru(1)   Ru(2)   C(18)   C(14)   -155.8(5) 1_555 1_555 1_555 1_555 yes
   Ru(1)   Ru(2)   C(18)   C(17)   86.0(9)  1_555 1_555 1_555 1_555 yes
   Ru(1)   Ru(2)   C(18)   C(23)   -34(1)   1_555 1_555 1_555 1_555 yes
   Ru(1)   S(1)    Pd(1)   Ru(2)   71.23(8) 1_555 1_555 1_555 1_555 yes
   Ru(1)   S(1)    Pd(1)   S(3)    54.7(2)  1_555 1_555 1_555 1_555 yes
   Ru(1)   S(1)    Pd(1)   P(1)    -143.70(10) 1_555 1_555 1_555 1_555 yes
   Ru(1)   S(1)    Ru(2)   S(2)    -2.6(1)  1_555 1_555 1_555 1_555 yes
   Ru(1)   S(1)    Ru(2)   C(14)   -162.7(3) 1_555 1_555 1_555 1_555 yes
   Ru(1)   S(1)    Ru(2)   C(15)   172.3(3) 1_555 1_555 1_555 1_555 yes
   Ru(1)   S(1)    Ru(2)   C(16)   134.9(3) 1_555 1_555 1_555 1_555 yes
   Ru(1)   S(1)    Ru(2)   C(17)   115.4(5) 1_555 1_555 1_555 1_555 yes
   Ru(1)   S(1)    Ru(2)   C(18)   172(1)   1_555 1_555 1_555 1_555 yes
   Ru(1)   S(2)    Pd(2)   Ru(2)   -72.16(7) 1_555 1_555 1_555 1_555 yes
   Ru(1)   S(2)    Pd(2)   Br(1)   132.05(7) 1_555 1_555 1_555 1_555 yes
   Ru(1)   S(2)    Pd(2)   S(3)    -56.8(3) 1_555 1_555 1_555 1_555 yes
   Ru(1)   S(2)    Ru(2)   S(1)    2.7(1)   1_555 1_555 1_555 1_555 yes
   Ru(1)   S(2)    Ru(2)   C(14)   162.0(4) 1_555 1_555 1_555 1_555 yes
   Ru(1)   S(2)    Ru(2)   C(15)   -164.4(8) 1_555 1_555 1_555 1_555 yes
   Ru(1)   S(2)    Ru(2)   C(16)   -115.7(4) 1_555 1_555 1_555 1_555 yes
   Ru(1)   S(2)    Ru(2)   C(17)   -136.3(5) 1_555 1_555 1_555 1_555 yes
   Ru(1)   S(2)    Ru(2)   C(18)   -175.2(4) 1_555 1_555 1_555 1_555 yes
   Ru(1)   C(4)    C(5)    C(6)    -62.0(8) 1_555 1_555 1_555 1_555 yes
   Ru(1)   C(4)    C(5)    C(10)   120(1)   1_555 1_555 1_555 1_555 yes
   Ru(1)   C(4)    C(8)    C(7)    64(1)    1_555 1_555 1_555 1_555 yes
   Ru(1)   C(4)    C(8)    C(13)   -121(1)  1_555 1_555 1_555 1_555 yes
   Ru(1)   C(5)    C(4)    C(8)    59(1)    1_555 1_555 1_555 1_555 yes
   Ru(1)   C(5)    C(4)    C(9)    -121(1)  1_555 1_555 1_555 1_555 yes
   Ru(1)   C(5)    C(6)    C(7)    -62.3(8) 1_555 1_555 1_555 1_555 yes
   Ru(1)   C(5)    C(6)    C(11)   120(1)   1_555 1_555 1_555 1_555 yes
   Ru(1)   C(6)    C(5)    C(4)    62.6(9)  1_555 1_555 1_555 1_555 yes
   Ru(1)   C(6)    C(5)    C(10)   -120(1)  1_555 1_555 1_555 1_555 yes
   Ru(1)   C(6)    C(7)    C(8)    -61.1(10) 1_555 1_555 1_555 1_555 yes
   Ru(1)   C(6)    C(7)    C(12)   121(1)   1_555 1_555 1_555 1_555 yes
   Ru(1)   C(7)    C(6)    C(5)    62.9(8)  1_555 1_555 1_555 1_555 yes
   Ru(1)   C(7)    C(6)    C(11)   -119(1)  1_555 1_555 1_555 1_555 yes
   Ru(1)   C(7)    C(8)    C(4)    -65(1)   1_555 1_555 1_555 1_555 yes
   Ru(1)   C(7)    C(8)    C(13)   121(1)   1_555 1_555 1_555 1_555 yes
   Ru(1)   C(8)    C(4)    C(5)    -60(1)   1_555 1_555 1_555 1_555 yes
   Ru(1)   C(8)    C(4)    C(9)    120(1)   1_555 1_555 1_555 1_555 yes
   Ru(1)   C(8)    C(7)    C(6)    62.1(9)  1_555 1_555 1_555 1_555 yes
   Ru(1)   C(8)    C(7)    C(12)   -119(1)  1_555 1_555 1_555 1_555 yes
   Ru(2)   Pd(1)   Pd(2)   Br(1)   178.4(1) 1_555 1_555 1_555 1_555 yes
   Ru(2)   Pd(1)   Pd(2)   S(2)    -31.63(8) 1_555 1_555 1_555 1_555 yes
   Ru(2)   Pd(1)   Pd(2)   S(3)    137.4(1) 1_555 1_555 1_555 1_555 yes
   Ru(2)   Pd(1)   Ru(1)   S(1)    -66.58(10) 1_555 1_555 1_555 1_555 yes
   Ru(2)   Pd(1)   Ru(1)   S(2)    44.31(8) 1_555 1_555 1_555 1_555 yes
   Ru(2)   Pd(1)   Ru(1)   C(4)    -137.0(5) 1_555 1_555 1_555 1_555 yes
   Ru(2)   Pd(1)   Ru(1)   C(5)    -170.2(5) 1_555 1_555 1_555 1_555 yes
   Ru(2)   Pd(1)   Ru(1)   C(6)    154.5(5) 1_555 1_555 1_555 1_555 yes
   Ru(2)   Pd(1)   Ru(1)   C(7)    150.2(10) 1_555 1_555 1_555 1_555 yes
   Ru(2)   Pd(1)   Ru(1)   C(8)    -127.4(10) 1_555 1_555 1_555 1_555 yes
   Ru(2)   Pd(1)   S(3)    C(1)    -145.6(7) 1_555 1_555 1_555 1_555 yes
   Ru(2)   Pd(1)   P(1)    C(24)   70.8(4)  1_555 1_555 1_555 1_555 yes
   Ru(2)   Pd(1)   P(1)    C(30)   -165.7(4) 1_555 1_555 1_555 1_555 yes
   Ru(2)   Pd(1)   P(1)    C(36)   -49.2(4) 1_555 1_555 1_555 1_555 yes
   Ru(2)   Pd(2)   Pd(1)   S(1)    31.01(7) 1_555 1_555 1_555 1_555 yes
   Ru(2)   Pd(2)   Pd(1)   S(3)    -137.4(1) 1_555 1_555 1_555 1_555 yes
   Ru(2)   Pd(2)   Pd(1)   P(1)    -150.7(2) 1_555 1_555 1_555 1_555 yes
   Ru(2)   Pd(2)   Ru(1)   S(1)    -45.59(8) 1_555 1_555 1_555 1_555 yes
   Ru(2)   Pd(2)   Ru(1)   S(2)    67.19(9) 1_555 1_555 1_555 1_555 yes
   Ru(2)   Pd(2)   Ru(1)   C(4)    -147.3(10) 1_555 1_555 1_555 1_555 yes
   Ru(2)   Pd(2)   Ru(1)   C(5)    -153.3(4) 1_555 1_555 1_555 1_555 yes
   Ru(2)   Pd(2)   Ru(1)   C(6)    171.5(6) 1_555 1_555 1_555 1_555 yes
   Ru(2)   Pd(2)   Ru(1)   C(7)    136.0(7) 1_555 1_555 1_555 1_555 yes
   Ru(2)   Pd(2)   Ru(1)   C(8)    127(1)   1_555 1_555 1_555 1_555 yes
   Ru(2)   Pd(2)   S(3)    C(1)    154.1(6) 1_555 1_555 1_555 1_555 yes
   Ru(2)   Ru(1)   Pd(1)   S(1)    66.58(10) 1_555 1_555 1_555 1_555 yes
   Ru(2)   Ru(1)   Pd(1)   S(3)    -87.52(9) 1_555 1_555 1_555 1_555 yes
   Ru(2)   Ru(1)   Pd(1)   P(1)    122.8(1) 1_555 1_555 1_555 1_555 yes
   Ru(2)   Ru(1)   Pd(2)   Br(1)   -132.86(7) 1_555 1_555 1_555 1_555 yes
   Ru(2)   Ru(1)   Pd(2)   S(2)    -67.19(9) 1_555 1_555 1_555 1_555 yes
   Ru(2)   Ru(1)   Pd(2)   S(3)    90.23(9) 1_555 1_555 1_555 1_555 yes
   Ru(2)   Ru(1)   C(4)    C(5)    -140.7(7) 1_555 1_555 1_555 1_555 yes
   Ru(2)   Ru(1)   C(4)    C(8)    98(1)    1_555 1_555 1_555 1_555 yes
   Ru(2)   Ru(1)   C(4)    C(9)    -26(2)   1_555 1_555 1_555 1_555 yes
   Ru(2)   Ru(1)   C(5)    C(4)    99(1)    1_555 1_555 1_555 1_555 yes
   Ru(2)   Ru(1)   C(5)    C(6)    -143.1(9) 1_555 1_555 1_555 1_555 yes
   Ru(2)   Ru(1)   C(5)    C(10)   -22(2)   1_555 1_555 1_555 1_555 yes
   Ru(2)   Ru(1)   C(6)    C(5)    142(1)   1_555 1_555 1_555 1_555 yes
   Ru(2)   Ru(1)   C(6)    C(7)    -102(1)  1_555 1_555 1_555 1_555 yes
   Ru(2)   Ru(1)   C(6)    C(11)   12(3)    1_555 1_555 1_555 1_555 yes
   Ru(2)   Ru(1)   C(7)    C(6)    142.4(7) 1_555 1_555 1_555 1_555 yes
   Ru(2)   Ru(1)   C(7)    C(8)    -100.4(10) 1_555 1_555 1_555 1_555 yes
   Ru(2)   Ru(1)   C(7)    C(12)   15(3)    1_555 1_555 1_555 1_555 yes
   Ru(2)   Ru(1)   C(8)    C(4)    -121.9(8) 1_555 1_555 1_555 1_555 yes
   Ru(2)   Ru(1)   C(8)    C(7)    122.1(10) 1_555 1_555 1_555 1_555 yes
   Ru(2)   Ru(1)   C(8)    C(13)   -5(3)    1_555 1_555 1_555 1_555 yes
   Ru(2)   S(1)    Pd(1)   S(3)    -16.6(2) 1_555 1_555 1_555 1_555 yes
   Ru(2)   S(1)    Pd(1)   P(1)    145.06(9) 1_555 1_555 1_555 1_555 yes
   Ru(2)   S(1)    Ru(1)   S(2)    2.6(1)   1_555 1_555 1_555 1_555 yes
   Ru(2)   S(1)    Ru(1)   C(4)    -157.6(6) 1_555 1_555 1_555 1_555 yes
   Ru(2)   S(1)    Ru(1)   C(5)    167.7(5) 1_555 1_555 1_555 1_555 yes
   Ru(2)   S(1)    Ru(1)   C(6)    156.4(6) 1_555 1_555 1_555 1_555 yes
   Ru(2)   S(1)    Ru(1)   C(7)    -133(1)  1_555 1_555 1_555 1_555 yes
   Ru(2)   S(1)    Ru(1)   C(8)    -127.2(6) 1_555 1_555 1_555 1_555 yes
   Ru(2)   S(2)    Pd(2)   Br(1)   -155.80(7) 1_555 1_555 1_555 1_555 yes
   Ru(2)   S(2)    Pd(2)   S(3)    15.3(3)  1_555 1_555 1_555 1_555 yes
   Ru(2)   S(2)    Ru(1)   S(1)    -2.6(1)  1_555 1_555 1_555 1_555 yes
   Ru(2)   S(2)    Ru(1)   C(4)    133.4(9) 1_555 1_555 1_555 1_555 yes
   Ru(2)   S(2)    Ru(1)   C(5)    -157.8(7) 1_555 1_555 1_555 1_555 yes
   Ru(2)   S(2)    Ru(1)   C(6)    -166.0(5) 1_555 1_555 1_555 1_555 yes
   Ru(2)   S(2)    Ru(1)   C(7)    157.8(8) 1_555 1_555 1_555 1_555 yes
   Ru(2)   S(2)    Ru(1)   C(8)    126.3(6) 1_555 1_555 1_555 1_555 yes
   Ru(2)   C(14)   C(15)   C(16)   -59.0(8) 1_555 1_555 1_555 1_555 yes
   Ru(2)   C(14)   C(15)   C(20)   121(1)   1_555 1_555 1_555 1_555 yes
   Ru(2)   C(14)   C(18)   C(17)   59.5(8)  1_555 1_555 1_555 1_555 yes
   Ru(2)   C(14)   C(18)   C(23)   -121(1)  1_555 1_555 1_555 1_555 yes
   Ru(2)   C(15)   C(14)   C(18)   61.4(8)  1_555 1_555 1_555 1_555 yes
   Ru(2)   C(15)   C(14)   C(19)   -123(1)  1_555 1_555 1_555 1_555 yes
   Ru(2)   C(15)   C(16)   C(17)   -62.2(8) 1_555 1_555 1_555 1_555 yes
   Ru(2)   C(15)   C(16)   C(21)   123(1)   1_555 1_555 1_555 1_555 yes
   Ru(2)   C(16)   C(15)   C(14)   60.8(8)  1_555 1_555 1_555 1_555 yes
   Ru(2)   C(16)   C(15)   C(20)   -119(1)  1_555 1_555 1_555 1_555 yes
   Ru(2)   C(16)   C(17)   C(18)   -64.6(8) 1_555 1_555 1_555 1_555 yes
   Ru(2)   C(16)   C(17)   C(22)   118(1)   1_555 1_555 1_555 1_555 yes
   Ru(2)   C(17)   C(16)   C(15)   64.6(8)  1_555 1_555 1_555 1_555 yes
   Ru(2)   C(17)   C(16)   C(21)   -120(1)  1_555 1_555 1_555 1_555 yes
   Ru(2)   C(17)   C(18)   C(14)   -61.9(8) 1_555 1_555 1_555 1_555 yes
   Ru(2)   C(17)   C(18)   C(23)   119(1)   1_555 1_555 1_555 1_555 yes
   Ru(2)   C(18)   C(14)   C(15)   -61.9(8) 1_555 1_555 1_555 1_555 yes
   Ru(2)   C(18)   C(14)   C(19)   123(1)   1_555 1_555 1_555 1_555 yes
   Ru(2)   C(18)   C(17)   C(16)   63.4(8)  1_555 1_555 1_555 1_555 yes
   Ru(2)   C(18)   C(17)   C(22)   -119(1)  1_555 1_555 1_555 1_555 yes
   Br(1)   Pd(2)   Pd(1)   S(1)    -150.6(1) 1_555 1_555 1_555 1_555 yes
   Br(1)   Pd(2)   Pd(1)   S(3)    41.0(2)  1_555 1_555 1_555 1_555 yes
   Br(1)   Pd(2)   Pd(1)   P(1)    27.6(3)  1_555 1_555 1_555 1_555 yes
   Br(1)   Pd(2)   Ru(1)   S(1)    -178.45(9) 1_555 1_555 1_555 1_555 yes
   Br(1)   Pd(2)   Ru(1)   S(2)    -65.7(1) 1_555 1_555 1_555 1_555 yes
   Br(1)   Pd(2)   Ru(1)   C(4)    79.8(10) 1_555 1_555 1_555 1_555 yes
   Br(1)   Pd(2)   Ru(1)   C(5)    73.8(4)  1_555 1_555 1_555 1_555 yes
   Br(1)   Pd(2)   Ru(1)   C(6)    38.7(6)  1_555 1_555 1_555 1_555 yes
   Br(1)   Pd(2)   Ru(1)   C(7)    3.1(7)   1_555 1_555 1_555 1_555 yes
   Br(1)   Pd(2)   Ru(1)   C(8)    -5(1)    1_555 1_555 1_555 1_555 yes
   Br(1)   Pd(2)   Ru(2)   S(1)    150.4(1) 1_555 1_555 1_555 1_555 yes
   Br(1)   Pd(2)   Ru(2)   S(2)    41.7(1)  1_555 1_555 1_555 1_555 yes
   Br(1)   Pd(2)   Ru(2)   C(14)   -84.4(3) 1_555 1_555 1_555 1_555 yes
   Br(1)   Pd(2)   Ru(2)   C(15)   -107.8(4) 1_555 1_555 1_555 1_555 yes
   Br(1)   Pd(2)   Ru(2)   C(16)   -60(1)   1_555 1_555 1_555 1_555 yes
   Br(1)   Pd(2)   Ru(2)   C(17)   -19.0(5) 1_555 1_555 1_555 1_555 yes
   Br(1)   Pd(2)   Ru(2)   C(18)   -46.9(4) 1_555 1_555 1_555 1_555 yes
   Br(1)   Pd(2)   S(3)    C(1)    -47.4(6) 1_555 1_555 1_555 1_555 yes
   S(1)    Pd(1)   Pd(2)   S(2)    -0.6(1)  1_555 1_555 1_555 1_555 yes
   S(1)    Pd(1)   Pd(2)   S(3)    168.4(1) 1_555 1_555 1_555 1_555 yes
   S(1)    Pd(1)   Ru(1)   S(2)    110.9(1) 1_555 1_555 1_555 1_555 yes
   S(1)    Pd(1)   Ru(1)   C(4)    -70.4(5) 1_555 1_555 1_555 1_555 yes
   S(1)    Pd(1)   Ru(1)   C(5)    -103.7(5) 1_555 1_555 1_555 1_555 yes
   S(1)    Pd(1)   Ru(1)   C(6)    -138.9(5) 1_555 1_555 1_555 1_555 yes
   S(1)    Pd(1)   Ru(1)   C(7)    -143.3(10) 1_555 1_555 1_555 1_555 yes
   S(1)    Pd(1)   Ru(1)   C(8)    -60.8(10) 1_555 1_555 1_555 1_555 yes
   S(1)    Pd(1)   Ru(2)   S(2)    -107.3(1) 1_555 1_555 1_555 1_555 yes
   S(1)    Pd(1)   Ru(2)   C(14)   124.1(3) 1_555 1_555 1_555 1_555 yes
   S(1)    Pd(1)   Ru(2)   C(15)   86.6(3)  1_555 1_555 1_555 1_555 yes
   S(1)    Pd(1)   Ru(2)   C(16)   61.2(4)  1_555 1_555 1_555 1_555 yes
   S(1)    Pd(1)   Ru(2)   C(17)   102(1)   1_555 1_555 1_555 1_555 yes
   S(1)    Pd(1)   Ru(2)   C(18)   147.9(4) 1_555 1_555 1_555 1_555 yes
   S(1)    Pd(1)   S(3)    C(1)    -132.8(7) 1_555 1_555 1_555 1_555 yes
   S(1)    Pd(1)   P(1)    C(24)   30.4(4)  1_555 1_555 1_555 1_555 yes
   S(1)    Pd(1)   P(1)    C(30)   153.9(4) 1_555 1_555 1_555 1_555 yes
   S(1)    Pd(1)   P(1)    C(36)   -89.7(4) 1_555 1_555 1_555 1_555 yes
   S(1)    Ru(1)   Pd(1)   S(3)    -154.1(1) 1_555 1_555 1_555 1_555 yes
   S(1)    Ru(1)   Pd(1)   P(1)    56.3(1)  1_555 1_555 1_555 1_555 yes
   S(1)    Ru(1)   Pd(2)   S(2)    -112.8(1) 1_555 1_555 1_555 1_555 yes
   S(1)    Ru(1)   Pd(2)   S(3)    44.6(1)  1_555 1_555 1_555 1_555 yes
   S(1)    Ru(1)   Ru(2)   S(2)    176.9(1) 1_555 1_555 1_555 1_555 yes
   S(1)    Ru(1)   Ru(2)   C(14)   82(1)    1_555 1_555 1_555 1_555 yes
   S(1)    Ru(1)   Ru(2)   C(15)   -14.4(6) 1_555 1_555 1_555 1_555 yes
   S(1)    Ru(1)   Ru(2)   C(16)   -67.0(5) 1_555 1_555 1_555 1_555 yes
   S(1)    Ru(1)   Ru(2)   C(17)   -118.6(6) 1_555 1_555 1_555 1_555 yes
   S(1)    Ru(1)   Ru(2)   C(18)   -173.7(8) 1_555 1_555 1_555 1_555 yes
   S(1)    Ru(1)   C(4)    C(5)    -111(1)  1_555 1_555 1_555 1_555 yes
   S(1)    Ru(1)   C(4)    C(8)    128(1)   1_555 1_555 1_555 1_555 yes
   S(1)    Ru(1)   C(4)    C(9)    2(2)     1_555 1_555 1_555 1_555 yes
   S(1)    Ru(1)   C(5)    C(4)    74(1)    1_555 1_555 1_555 1_555 yes
   S(1)    Ru(1)   C(5)    C(6)    -168.6(9) 1_555 1_555 1_555 1_555 yes
   S(1)    Ru(1)   C(5)    C(10)   -48(2)   1_555 1_555 1_555 1_555 yes
   S(1)    Ru(1)   C(6)    C(5)    17(1)    1_555 1_555 1_555 1_555 yes
   S(1)    Ru(1)   C(6)    C(7)    132(1)   1_555 1_555 1_555 1_555 yes
   S(1)    Ru(1)   C(6)    C(11)   -111(2)  1_555 1_555 1_555 1_555 yes
   S(1)    Ru(1)   C(7)    C(6)    -108(1)  1_555 1_555 1_555 1_555 yes
   S(1)    Ru(1)   C(7)    C(8)    9(2)     1_555 1_555 1_555 1_555 yes
   S(1)    Ru(1)   C(7)    C(12)   124(2)   1_555 1_555 1_555 1_555 yes
   S(1)    Ru(1)   C(8)    C(4)    -59(1)   1_555 1_555 1_555 1_555 yes
   S(1)    Ru(1)   C(8)    C(7)    -175(1)  1_555 1_555 1_555 1_555 yes
   S(1)    Ru(1)   C(8)    C(13)   57(2)    1_555 1_555 1_555 1_555 yes
   S(1)    Ru(2)   Pd(1)   S(3)    171.7(1) 1_555 1_555 1_555 1_555 yes
   S(1)    Ru(2)   Pd(1)   P(1)    -56.7(1) 1_555 1_555 1_555 1_555 yes
   S(1)    Ru(2)   Pd(2)   S(2)    108.8(1) 1_555 1_555 1_555 1_555 yes
   S(1)    Ru(2)   Pd(2)   S(3)    -64.7(1) 1_555 1_555 1_555 1_555 yes
   S(1)    Ru(2)   Ru(1)   S(2)    -176.9(1) 1_555 1_555 1_555 1_555 yes
   S(1)    Ru(2)   Ru(1)   C(4)    37(1)    1_555 1_555 1_555 1_555 yes
   S(1)    Ru(2)   Ru(1)   C(5)    -30(1)   1_555 1_555 1_555 1_555 yes
   S(1)    Ru(2)   Ru(1)   C(6)    -140(1)  1_555 1_555 1_555 1_555 yes
   S(1)    Ru(2)   Ru(1)   C(7)    146(1)   1_555 1_555 1_555 1_555 yes
   S(1)    Ru(2)   Ru(1)   C(8)    90(1)    1_555 1_555 1_555 1_555 yes
   S(1)    Ru(2)   C(14)   C(15)   -44.5(8) 1_555 1_555 1_555 1_555 yes
   S(1)    Ru(2)   C(14)   C(18)   -163.1(7) 1_555 1_555 1_555 1_555 yes
   S(1)    Ru(2)   C(14)   C(19)   75(1)    1_555 1_555 1_555 1_555 yes
   S(1)    Ru(2)   C(15)   C(14)   143.6(7) 1_555 1_555 1_555 1_555 yes
   S(1)    Ru(2)   C(15)   C(16)   -97.5(7) 1_555 1_555 1_555 1_555 yes
   S(1)    Ru(2)   C(15)   C(20)   21(1)    1_555 1_555 1_555 1_555 yes
   S(1)    Ru(2)   C(16)   C(15)   86.2(7)  1_555 1_555 1_555 1_555 yes
   S(1)    Ru(2)   C(16)   C(17)   -156.8(7) 1_555 1_555 1_555 1_555 yes
   S(1)    Ru(2)   C(16)   C(21)   -38(1)   1_555 1_555 1_555 1_555 yes
   S(1)    Ru(2)   C(17)   C(16)   31.9(9)  1_555 1_555 1_555 1_555 yes
   S(1)    Ru(2)   C(17)   C(18)   146.7(6) 1_555 1_555 1_555 1_555 yes
   S(1)    Ru(2)   C(17)   C(22)   -92(1)   1_555 1_555 1_555 1_555 yes
   S(1)    Ru(2)   C(18)   C(14)   36(1)    1_555 1_555 1_555 1_555 yes
   S(1)    Ru(2)   C(18)   C(17)   -81(1)   1_555 1_555 1_555 1_555 yes
   S(1)    Ru(2)   C(18)   C(23)   158(1)   1_555 1_555 1_555 1_555 yes
   S(2)    Pd(2)   Pd(1)   S(3)    -169.0(1) 1_555 1_555 1_555 1_555 yes
   S(2)    Pd(2)   Pd(1)   P(1)    177.6(2) 1_555 1_555 1_555 1_555 yes
   S(2)    Pd(2)   Ru(1)   C(4)    145.5(10) 1_555 1_555 1_555 1_555 yes
   S(2)    Pd(2)   Ru(1)   C(5)    139.5(4) 1_555 1_555 1_555 1_555 yes
   S(2)    Pd(2)   Ru(1)   C(6)    104.3(6) 1_555 1_555 1_555 1_555 yes
   S(2)    Pd(2)   Ru(1)   C(7)    68.8(7)  1_555 1_555 1_555 1_555 yes
   S(2)    Pd(2)   Ru(1)   C(8)    60(1)    1_555 1_555 1_555 1_555 yes
   S(2)    Pd(2)   Ru(2)   C(14)   -126.0(3) 1_555 1_555 1_555 1_555 yes
   S(2)    Pd(2)   Ru(2)   C(15)   -149.5(4) 1_555 1_555 1_555 1_555 yes
   S(2)    Pd(2)   Ru(2)   C(16)   -101(1)  1_555 1_555 1_555 1_555 yes
   S(2)    Pd(2)   Ru(2)   C(17)   -60.7(5) 1_555 1_555 1_555 1_555 yes
   S(2)    Pd(2)   Ru(2)   C(18)   -88.6(4) 1_555 1_555 1_555 1_555 yes
   S(2)    Pd(2)   S(3)    C(1)    141.8(6) 1_555 1_555 1_555 1_555 yes
   S(2)    Ru(1)   Pd(1)   S(3)    -43.2(1) 1_555 1_555 1_555 1_555 yes
   S(2)    Ru(1)   Pd(1)   P(1)    167.2(1) 1_555 1_555 1_555 1_555 yes
   S(2)    Ru(1)   Pd(2)   S(3)    157.4(1) 1_555 1_555 1_555 1_555 yes
   S(2)    Ru(1)   Ru(2)   C(14)   -94(1)   1_555 1_555 1_555 1_555 yes
   S(2)    Ru(1)   Ru(2)   C(15)   168.7(6) 1_555 1_555 1_555 1_555 yes
   S(2)    Ru(1)   Ru(2)   C(16)   116.1(5) 1_555 1_555 1_555 1_555 yes
   S(2)    Ru(1)   Ru(2)   C(17)   64.5(6)  1_555 1_555 1_555 1_555 yes
   S(2)    Ru(1)   Ru(2)   C(18)   9.4(8)   1_555 1_555 1_555 1_555 yes
   S(2)    Ru(1)   C(4)    C(5)    110(1)   1_555 1_555 1_555 1_555 yes
   S(2)    Ru(1)   C(4)    C(8)    -10(1)   1_555 1_555 1_555 1_555 yes
   S(2)    Ru(1)   C(4)    C(9)    -135(1)  1_555 1_555 1_555 1_555 yes
   S(2)    Ru(1)   C(5)    C(4)    -129(1)  1_555 1_555 1_555 1_555 yes
   S(2)    Ru(1)   C(5)    C(6)    -12(1)   1_555 1_555 1_555 1_555 yes
   S(2)    Ru(1)   C(5)    C(10)   107(1)   1_555 1_555 1_555 1_555 yes
   S(2)    Ru(1)   C(6)    C(5)    172.1(9) 1_555 1_555 1_555 1_555 yes
   S(2)    Ru(1)   C(6)    C(7)    -72(1)   1_555 1_555 1_555 1_555 yes
   S(2)    Ru(1)   C(6)    C(11)   42(2)    1_555 1_555 1_555 1_555 yes
   S(2)    Ru(1)   C(7)    C(6)    113(1)   1_555 1_555 1_555 1_555 yes
   S(2)    Ru(1)   C(7)    C(8)    -129(1)  1_555 1_555 1_555 1_555 yes
   S(2)    Ru(1)   C(7)    C(12)   -14(2)   1_555 1_555 1_555 1_555 yes
   S(2)    Ru(1)   C(8)    C(4)    174.2(10) 1_555 1_555 1_555 1_555 yes
   S(2)    Ru(1)   C(8)    C(7)    58(1)    1_555 1_555 1_555 1_555 yes
   S(2)    Ru(1)   C(8)    C(13)   -69(2)   1_555 1_555 1_555 1_555 yes
   S(2)    Ru(2)   Pd(1)   S(3)    64.4(1)  1_555 1_555 1_555 1_555 yes
   S(2)    Ru(2)   Pd(1)   P(1)    -164.0(1) 1_555 1_555 1_555 1_555 yes
   S(2)    Ru(2)   Pd(2)   S(3)    -173.5(1) 1_555 1_555 1_555 1_555 yes
   S(2)    Ru(2)   Ru(1)   C(4)    -145(1)  1_555 1_555 1_555 1_555 yes
   S(2)    Ru(2)   Ru(1)   C(5)    146(1)   1_555 1_555 1_555 1_555 yes
   S(2)    Ru(2)   Ru(1)   C(6)    36(1)    1_555 1_555 1_555 1_555 yes
   S(2)    Ru(2)   Ru(1)   C(7)    -36(1)   1_555 1_555 1_555 1_555 yes
   S(2)    Ru(2)   Ru(1)   C(8)    -92(1)   1_555 1_555 1_555 1_555 yes
   S(2)    Ru(2)   C(14)   C(15)   158.7(6) 1_555 1_555 1_555 1_555 yes
   S(2)    Ru(2)   C(14)   C(18)   40.2(9)  1_555 1_555 1_555 1_555 yes
   S(2)    Ru(2)   C(14)   C(19)   -81(1)   1_555 1_555 1_555 1_555 yes
   S(2)    Ru(2)   C(15)   C(14)   -48(1)   1_555 1_555 1_555 1_555 yes
   S(2)    Ru(2)   C(15)   C(16)   70(1)    1_555 1_555 1_555 1_555 yes
   S(2)    Ru(2)   C(15)   C(20)   -170.6(7) 1_555 1_555 1_555 1_555 yes
   S(2)    Ru(2)   C(16)   C(15)   -150.8(6) 1_555 1_555 1_555 1_555 yes
   S(2)    Ru(2)   C(16)   C(17)   -33.9(9) 1_555 1_555 1_555 1_555 yes
   S(2)    Ru(2)   C(16)   C(21)   84(1)    1_555 1_555 1_555 1_555 yes
   S(2)    Ru(2)   C(17)   C(16)   154.8(7) 1_555 1_555 1_555 1_555 yes
   S(2)    Ru(2)   C(17)   C(18)   -90.4(7) 1_555 1_555 1_555 1_555 yes
   S(2)    Ru(2)   C(17)   C(22)   30(1)    1_555 1_555 1_555 1_555 yes
   S(2)    Ru(2)   C(18)   C(14)   -148.1(7) 1_555 1_555 1_555 1_555 yes
   S(2)    Ru(2)   C(18)   C(17)   93.7(7)  1_555 1_555 1_555 1_555 yes
   S(2)    Ru(2)   C(18)   C(23)   -26(1)   1_555 1_555 1_555 1_555 yes
   S(3)    Pd(1)   Ru(1)   C(4)    135.5(5) 1_555 1_555 1_555 1_555 yes
   S(3)    Pd(1)   Ru(1)   C(5)    102.2(5) 1_555 1_555 1_555 1_555 yes
   S(3)    Pd(1)   Ru(1)   C(6)    67.0(5)  1_555 1_555 1_555 1_555 yes
   S(3)    Pd(1)   Ru(1)   C(7)    62.6(10) 1_555 1_555 1_555 1_555 yes
   S(3)    Pd(1)   Ru(1)   C(8)    145.1(10) 1_555 1_555 1_555 1_555 yes
   S(3)    Pd(1)   Ru(2)   C(14)   -64.2(3) 1_555 1_555 1_555 1_555 yes
   S(3)    Pd(1)   Ru(2)   C(15)   -101.7(3) 1_555 1_555 1_555 1_555 yes
   S(3)    Pd(1)   Ru(2)   C(16)   -127.1(4) 1_555 1_555 1_555 1_555 yes
   S(3)    Pd(1)   Ru(2)   C(17)   -85(1)   1_555 1_555 1_555 1_555 yes
   S(3)    Pd(1)   Ru(2)   C(18)   -40.4(4) 1_555 1_555 1_555 1_555 yes
   S(3)    Pd(1)   P(1)    C(24)   -159.0(4) 1_555 1_555 1_555 1_555 yes
   S(3)    Pd(1)   P(1)    C(30)   -35.5(4) 1_555 1_555 1_555 1_555 yes
   S(3)    Pd(1)   P(1)    C(36)   80.9(4)  1_555 1_555 1_555 1_555 yes
   S(3)    Pd(2)   Pd(1)   P(1)    -13.3(3) 1_555 1_555 1_555 1_555 yes
   S(3)    Pd(2)   Ru(1)   C(4)    -57.1(10) 1_555 1_555 1_555 1_555 yes
   S(3)    Pd(2)   Ru(1)   C(5)    -63.1(5) 1_555 1_555 1_555 1_555 yes
   S(3)    Pd(2)   Ru(1)   C(6)    -98.3(6) 1_555 1_555 1_555 1_555 yes
   S(3)    Pd(2)   Ru(1)   C(7)    -133.8(7) 1_555 1_555 1_555 1_555 yes
   S(3)    Pd(2)   Ru(1)   C(8)    -141(1)  1_555 1_555 1_555 1_555 yes
   S(3)    Pd(2)   Ru(2)   C(14)   60.5(3)  1_555 1_555 1_555 1_555 yes
   S(3)    Pd(2)   Ru(2)   C(15)   37.0(4)  1_555 1_555 1_555 1_555 yes
   S(3)    Pd(2)   Ru(2)   C(16)   84(1)    1_555 1_555 1_555 1_555 yes
   S(3)    Pd(2)   Ru(2)   C(17)   125.8(5) 1_555 1_555 1_555 1_555 yes
   S(3)    Pd(2)   Ru(2)   C(18)   97.9(4)  1_555 1_555 1_555 1_555 yes
   P(1)    Pd(1)   Ru(1)   C(4)    -14.1(5) 1_555 1_555 1_555 1_555 yes
   P(1)    Pd(1)   Ru(1)   C(5)    -47.4(5) 1_555 1_555 1_555 1_555 yes
   P(1)    Pd(1)   Ru(1)   C(6)    -82.6(5) 1_555 1_555 1_555 1_555 yes
   P(1)    Pd(1)   Ru(1)   C(7)    -87.0(10) 1_555 1_555 1_555 1_555 yes
   P(1)    Pd(1)   Ru(1)   C(8)    -4.6(10) 1_555 1_555 1_555 1_555 yes
   P(1)    Pd(1)   Ru(2)   C(14)   67.5(3)  1_555 1_555 1_555 1_555 yes
   P(1)    Pd(1)   Ru(2)   C(15)   30.0(3)  1_555 1_555 1_555 1_555 yes
   P(1)    Pd(1)   Ru(2)   C(16)   4.5(4)   1_555 1_555 1_555 1_555 yes
   P(1)    Pd(1)   Ru(2)   C(17)   45(1)    1_555 1_555 1_555 1_555 yes
   P(1)    Pd(1)   Ru(2)   C(18)   91.3(4)  1_555 1_555 1_555 1_555 yes
   P(1)    Pd(1)   S(3)    C(1)    66.0(7)  1_555 1_555 1_555 1_555 yes
   P(1)    C(24)   C(25)   C(26)   -175(1)  1_555 1_555 1_555 1_555 yes
   P(1)    C(24)   C(29)   C(28)   175.8(10) 1_555 1_555 1_555 1_555 yes
   P(1)    C(30)   C(31)   C(32)   -175(1)  1_555 1_555 1_555 1_555 yes
   P(1)    C(30)   C(35)   C(34)   176.5(9) 1_555 1_555 1_555 1_555 yes
   P(1)    C(36)   C(37)   C(38)   179.7(9) 1_555 1_555 1_555 1_555 yes
   P(1)    C(36)   C(41)   C(40)   -176.5(9) 1_555 1_555 1_555 1_555 yes
   C(4)    Ru(1)   Ru(2)   C(14)   120(1)   1_555 1_555 1_555 1_555 yes
   C(4)    Ru(1)   Ru(2)   C(15)   22(1)    1_555 1_555 1_555 1_555 yes
   C(4)    Ru(1)   Ru(2)   C(16)   -29(1)   1_555 1_555 1_555 1_555 yes
   C(4)    Ru(1)   Ru(2)   C(17)   -81(1)   1_555 1_555 1_555 1_555 yes
   C(4)    Ru(1)   Ru(2)   C(18)   -136(1)  1_555 1_555 1_555 1_555 yes
   C(4)    Ru(1)   C(5)    C(6)    117(1)   1_555 1_555 1_555 1_555 yes
   C(4)    Ru(1)   C(5)    C(10)   -122(2)  1_555 1_555 1_555 1_555 yes
   C(4)    Ru(1)   C(6)    C(5)    -36.5(9) 1_555 1_555 1_555 1_555 yes
   C(4)    Ru(1)   C(6)    C(7)    78.4(10) 1_555 1_555 1_555 1_555 yes
   C(4)    Ru(1)   C(6)    C(11)   -166(2)  1_555 1_555 1_555 1_555 yes
   C(4)    Ru(1)   C(7)    C(6)    -80.1(9) 1_555 1_555 1_555 1_555 yes
   C(4)    Ru(1)   C(7)    C(8)    37.1(10) 1_555 1_555 1_555 1_555 yes
   C(4)    Ru(1)   C(7)    C(12)   152(3)   1_555 1_555 1_555 1_555 yes
   C(4)    Ru(1)   C(8)    C(7)    -116(1)  1_555 1_555 1_555 1_555 yes
   C(4)    Ru(1)   C(8)    C(13)   116(3)   1_555 1_555 1_555 1_555 yes
   C(4)    C(5)    Ru(1)   C(6)    -117(1)  1_555 1_555 1_555 1_555 yes
   C(4)    C(5)    Ru(1)   C(7)    -78(1)   1_555 1_555 1_555 1_555 yes
   C(4)    C(5)    Ru(1)   C(8)    -35.0(10) 1_555 1_555 1_555 1_555 yes
   C(4)    C(5)    C(6)    C(7)    0(1)     1_555 1_555 1_555 1_555 yes
   C(4)    C(5)    C(6)    C(11)   -176(1)  1_555 1_555 1_555 1_555 yes
   C(4)    C(8)    Ru(1)   C(5)    35.1(9)  1_555 1_555 1_555 1_555 yes
   C(4)    C(8)    Ru(1)   C(6)    78(1)    1_555 1_555 1_555 1_555 yes
   C(4)    C(8)    Ru(1)   C(7)    116(1)   1_555 1_555 1_555 1_555 yes
   C(4)    C(8)    C(7)    C(6)    -3(1)    1_555 1_555 1_555 1_555 yes
   C(4)    C(8)    C(7)    C(12)   174(1)   1_555 1_555 1_555 1_555 yes
   C(5)    Ru(1)   Ru(2)   C(14)   51(1)    1_555 1_555 1_555 1_555 yes
   C(5)    Ru(1)   Ru(2)   C(15)   -45(1)   1_555 1_555 1_555 1_555 yes
   C(5)    Ru(1)   Ru(2)   C(16)   -97(1)   1_555 1_555 1_555 1_555 yes
   C(5)    Ru(1)   Ru(2)   C(17)   -149(1)  1_555 1_555 1_555 1_555 yes
   C(5)    Ru(1)   Ru(2)   C(18)   155(1)   1_555 1_555 1_555 1_555 yes
   C(5)    Ru(1)   C(4)    C(8)    -120(1)  1_555 1_555 1_555 1_555 yes
   C(5)    Ru(1)   C(4)    C(9)    113(2)   1_555 1_555 1_555 1_555 yes
   C(5)    Ru(1)   C(6)    C(7)    114(1)   1_555 1_555 1_555 1_555 yes
   C(5)    Ru(1)   C(6)    C(11)   -129(2)  1_555 1_555 1_555 1_555 yes
   C(5)    Ru(1)   C(7)    C(6)    -39.0(8) 1_555 1_555 1_555 1_555 yes
   C(5)    Ru(1)   C(7)    C(8)    78(1)    1_555 1_555 1_555 1_555 yes
   C(5)    Ru(1)   C(7)    C(12)   -166(3)  1_555 1_555 1_555 1_555 yes
   C(5)    Ru(1)   C(8)    C(7)    -80(1)   1_555 1_555 1_555 1_555 yes
   C(5)    Ru(1)   C(8)    C(13)   151(3)   1_555 1_555 1_555 1_555 yes
   C(5)    C(4)    Ru(1)   C(6)    38.4(9)  1_555 1_555 1_555 1_555 yes
   C(5)    C(4)    Ru(1)   C(7)    82(1)    1_555 1_555 1_555 1_555 yes
   C(5)    C(4)    Ru(1)   C(8)    120(1)   1_555 1_555 1_555 1_555 yes
   C(5)    C(4)    C(8)    C(7)    3(1)     1_555 1_555 1_555 1_555 yes
   C(5)    C(4)    C(8)    C(13)   177(1)   1_555 1_555 1_555 1_555 yes
   C(5)    C(6)    Ru(1)   C(7)    -114(1)  1_555 1_555 1_555 1_555 yes
   C(5)    C(6)    Ru(1)   C(8)    -77.3(10) 1_555 1_555 1_555 1_555 yes
   C(5)    C(6)    C(7)    C(8)    1(1)     1_555 1_555 1_555 1_555 yes
   C(5)    C(6)    C(7)    C(12)   -176(1)  1_555 1_555 1_555 1_555 yes
   C(6)    Ru(1)   Ru(2)   C(14)   -58(2)   1_555 1_555 1_555 1_555 yes
   C(6)    Ru(1)   Ru(2)   C(15)   -155(1)  1_555 1_555 1_555 1_555 yes
   C(6)    Ru(1)   Ru(2)   C(16)   152(1)   1_555 1_555 1_555 1_555 yes
   C(6)    Ru(1)   Ru(2)   C(17)   100(1)   1_555 1_555 1_555 1_555 yes
   C(6)    Ru(1)   Ru(2)   C(18)   45(1)    1_555 1_555 1_555 1_555 yes
   C(6)    Ru(1)   C(4)    C(8)    -82(1)   1_555 1_555 1_555 1_555 yes
   C(6)    Ru(1)   C(4)    C(9)    152(2)   1_555 1_555 1_555 1_555 yes
   C(6)    Ru(1)   C(5)    C(10)   120(2)   1_555 1_555 1_555 1_555 yes
   C(6)    Ru(1)   C(7)    C(8)    117(1)   1_555 1_555 1_555 1_555 yes
   C(6)    Ru(1)   C(7)    C(12)   -127(3)  1_555 1_555 1_555 1_555 yes
   C(6)    Ru(1)   C(8)    C(7)    -37.9(10) 1_555 1_555 1_555 1_555 yes
   C(6)    Ru(1)   C(8)    C(13)   -165(3)  1_555 1_555 1_555 1_555 yes
   C(6)    C(5)    Ru(1)   C(7)    39.1(9)  1_555 1_555 1_555 1_555 yes
   C(6)    C(5)    Ru(1)   C(8)    82.1(10) 1_555 1_555 1_555 1_555 yes
   C(6)    C(5)    C(4)    C(8)    -2(1)    1_555 1_555 1_555 1_555 yes
   C(6)    C(5)    C(4)    C(9)    176(1)   1_555 1_555 1_555 1_555 yes
   C(6)    C(7)    Ru(1)   C(8)    -117(1)  1_555 1_555 1_555 1_555 yes
   C(6)    C(7)    C(8)    C(13)   -176(1)  1_555 1_555 1_555 1_555 yes
   C(7)    Ru(1)   Ru(2)   C(14)   -131(1)  1_555 1_555 1_555 1_555 yes
   C(7)    Ru(1)   Ru(2)   C(15)   131(1)   1_555 1_555 1_555 1_555 yes
   C(7)    Ru(1)   Ru(2)   C(16)   79(1)    1_555 1_555 1_555 1_555 yes
   C(7)    Ru(1)   Ru(2)   C(17)   27(1)    1_555 1_555 1_555 1_555 yes
   C(7)    Ru(1)   Ru(2)   C(18)   -27(1)   1_555 1_555 1_555 1_555 yes
   C(7)    Ru(1)   C(4)    C(8)    -38(1)   1_555 1_555 1_555 1_555 yes
   C(7)    Ru(1)   C(4)    C(9)    -164(2)  1_555 1_555 1_555 1_555 yes
   C(7)    Ru(1)   C(5)    C(10)   159(2)   1_555 1_555 1_555 1_555 yes
   C(7)    Ru(1)   C(6)    C(11)   115(3)   1_555 1_555 1_555 1_555 yes
   C(7)    Ru(1)   C(8)    C(13)   -127(3)  1_555 1_555 1_555 1_555 yes
   C(7)    C(6)    Ru(1)   C(8)    37.6(9)  1_555 1_555 1_555 1_555 yes
   C(7)    C(6)    C(5)    C(10)   177(1)   1_555 1_555 1_555 1_555 yes
   C(7)    C(8)    C(4)    C(9)    -174(1)  1_555 1_555 1_555 1_555 yes
   C(8)    Ru(1)   Ru(2)   C(14)   173(1)   1_555 1_555 1_555 1_555 yes
   C(8)    Ru(1)   Ru(2)   C(15)   75(1)    1_555 1_555 1_555 1_555 yes
   C(8)    Ru(1)   Ru(2)   C(16)   23(1)    1_555 1_555 1_555 1_555 yes
   C(8)    Ru(1)   Ru(2)   C(17)   -28(1)   1_555 1_555 1_555 1_555 yes
   C(8)    Ru(1)   Ru(2)   C(18)   -83(1)   1_555 1_555 1_555 1_555 yes
   C(8)    Ru(1)   C(4)    C(9)    -125(2)  1_555 1_555 1_555 1_555 yes
   C(8)    Ru(1)   C(5)    C(10)   -157(2)  1_555 1_555 1_555 1_555 yes
   C(8)    Ru(1)   C(6)    C(11)   152(2)   1_555 1_555 1_555 1_555 yes
   C(8)    Ru(1)   C(7)    C(12)   115(3)   1_555 1_555 1_555 1_555 yes
   C(8)    C(4)    C(5)    C(10)   -179(1)  1_555 1_555 1_555 1_555 yes
   C(8)    C(7)    C(6)    C(11)   179(1)   1_555 1_555 1_555 1_555 yes
   C(9)    C(4)    C(5)    C(10)   -1(2)    1_555 1_555 1_555 1_555 yes
   C(9)    C(4)    C(8)    C(13)   -1(2)    1_555 1_555 1_555 1_555 yes
   C(10)   C(5)    C(6)    C(11)   0(2)     1_555 1_555 1_555 1_555 yes
   C(11)   C(6)    C(7)    C(12)   1(2)     1_555 1_555 1_555 1_555 yes
   C(12)   C(7)    C(8)    C(13)   1(2)     1_555 1_555 1_555 1_555 yes
   C(14)   Ru(2)   C(15)   C(16)   118(1)   1_555 1_555 1_555 1_555 yes
   C(14)   Ru(2)   C(15)   C(20)   -121(1)  1_555 1_555 1_555 1_555 yes
   C(14)   Ru(2)   C(16)   C(15)   -36.3(6) 1_555 1_555 1_555 1_555 yes
   C(14)   Ru(2)   C(16)   C(17)   80.7(8)  1_555 1_555 1_555 1_555 yes
   C(14)   Ru(2)   C(16)   C(21)   -160(1)  1_555 1_555 1_555 1_555 yes
   C(14)   Ru(2)   C(17)   C(16)   -78.7(7) 1_555 1_555 1_555 1_555 yes
   C(14)   Ru(2)   C(17)   C(18)   36.2(6)  1_555 1_555 1_555 1_555 yes
   C(14)   Ru(2)   C(17)   C(22)   157(1)   1_555 1_555 1_555 1_555 yes
   C(14)   Ru(2)   C(18)   C(17)   -118(1)  1_555 1_555 1_555 1_555 yes
   C(14)   Ru(2)   C(18)   C(23)   121(1)   1_555 1_555 1_555 1_555 yes
   C(14)   C(15)   Ru(2)   C(16)   -118(1)  1_555 1_555 1_555 1_555 yes
   C(14)   C(15)   Ru(2)   C(17)   -80.3(8) 1_555 1_555 1_555 1_555 yes
   C(14)   C(15)   Ru(2)   C(18)   -36.5(7) 1_555 1_555 1_555 1_555 yes
   C(14)   C(15)   C(16)   C(17)   -1(1)    1_555 1_555 1_555 1_555 yes
   C(14)   C(15)   C(16)   C(21)   -175(1)  1_555 1_555 1_555 1_555 yes
   C(14)   C(18)   Ru(2)   C(15)   36.7(7)  1_555 1_555 1_555 1_555 yes
   C(14)   C(18)   Ru(2)   C(16)   78.9(7)  1_555 1_555 1_555 1_555 yes
   C(14)   C(18)   Ru(2)   C(17)   118(1)   1_555 1_555 1_555 1_555 yes
   C(14)   C(18)   C(17)   C(16)   1(1)     1_555 1_555 1_555 1_555 yes
   C(14)   C(18)   C(17)   C(22)   178(1)   1_555 1_555 1_555 1_555 yes
   C(15)   Ru(2)   C(14)   C(18)   -118(1)  1_555 1_555 1_555 1_555 yes
   C(15)   Ru(2)   C(14)   C(19)   119(1)   1_555 1_555 1_555 1_555 yes
   C(15)   Ru(2)   C(16)   C(17)   116(1)   1_555 1_555 1_555 1_555 yes
   C(15)   Ru(2)   C(16)   C(21)   -124(1)  1_555 1_555 1_555 1_555 yes
   C(15)   Ru(2)   C(17)   C(16)   -37.2(6) 1_555 1_555 1_555 1_555 yes
   C(15)   Ru(2)   C(17)   C(18)   77.6(7)  1_555 1_555 1_555 1_555 yes
   C(15)   Ru(2)   C(17)   C(22)   -161(1)  1_555 1_555 1_555 1_555 yes
   C(15)   Ru(2)   C(18)   C(17)   -81.5(8) 1_555 1_555 1_555 1_555 yes
   C(15)   Ru(2)   C(18)   C(23)   157(1)   1_555 1_555 1_555 1_555 yes
   C(15)   C(14)   Ru(2)   C(16)   36.8(7)  1_555 1_555 1_555 1_555 yes
   C(15)   C(14)   Ru(2)   C(17)   80.5(8)  1_555 1_555 1_555 1_555 yes
   C(15)   C(14)   Ru(2)   C(18)   118(1)   1_555 1_555 1_555 1_555 yes
   C(15)   C(14)   C(18)   C(17)   -2(1)    1_555 1_555 1_555 1_555 yes
   C(15)   C(14)   C(18)   C(23)   176(1)   1_555 1_555 1_555 1_555 yes
   C(15)   C(16)   Ru(2)   C(17)   -116(1)  1_555 1_555 1_555 1_555 yes
   C(15)   C(16)   Ru(2)   C(18)   -77.7(7) 1_555 1_555 1_555 1_555 yes
   C(15)   C(16)   C(17)   C(18)   0(1)     1_555 1_555 1_555 1_555 yes
   C(15)   C(16)   C(17)   C(22)   -176(1)  1_555 1_555 1_555 1_555 yes
   C(16)   Ru(2)   C(14)   C(18)   -81.8(8) 1_555 1_555 1_555 1_555 yes
   C(16)   Ru(2)   C(14)   C(19)   156(1)   1_555 1_555 1_555 1_555 yes
   C(16)   Ru(2)   C(15)   C(20)   119(1)   1_555 1_555 1_555 1_555 yes
   C(16)   Ru(2)   C(17)   C(18)   114.9(10) 1_555 1_555 1_555 1_555 yes
   C(16)   Ru(2)   C(17)   C(22)   -124(2)  1_555 1_555 1_555 1_555 yes
   C(16)   Ru(2)   C(18)   C(17)   -39.4(7) 1_555 1_555 1_555 1_555 yes
   C(16)   Ru(2)   C(18)   C(23)   -159(1)  1_555 1_555 1_555 1_555 yes
   C(16)   C(15)   Ru(2)   C(17)   38.6(7)  1_555 1_555 1_555 1_555 yes
   C(16)   C(15)   Ru(2)   C(18)   82.4(8)  1_555 1_555 1_555 1_555 yes
   C(16)   C(15)   C(14)   C(18)   2(1)     1_555 1_555 1_555 1_555 yes
   C(16)   C(15)   C(14)   C(19)   177(1)   1_555 1_555 1_555 1_555 yes
   C(16)   C(17)   Ru(2)   C(18)   -114.9(10) 1_555 1_555 1_555 1_555 yes
   C(16)   C(17)   C(18)   C(23)   -177(1)  1_555 1_555 1_555 1_555 yes
   C(17)   Ru(2)   C(14)   C(18)   -38.1(7) 1_555 1_555 1_555 1_555 yes
   C(17)   Ru(2)   C(14)   C(19)   -159(1)  1_555 1_555 1_555 1_555 yes
   C(17)   Ru(2)   C(15)   C(20)   157(1)   1_555 1_555 1_555 1_555 yes
   C(17)   Ru(2)   C(16)   C(21)   118(1)   1_555 1_555 1_555 1_555 yes
   C(17)   Ru(2)   C(18)   C(23)   -120(1)  1_555 1_555 1_555 1_555 yes
   C(17)   C(16)   Ru(2)   C(18)   39.3(7)  1_555 1_555 1_555 1_555 yes
   C(17)   C(16)   C(15)   C(20)   178(1)   1_555 1_555 1_555 1_555 yes
   C(17)   C(18)   C(14)   C(19)   -177(1)  1_555 1_555 1_555 1_555 yes
   C(18)   Ru(2)   C(14)   C(19)   -121(1)  1_555 1_555 1_555 1_555 yes
   C(18)   Ru(2)   C(15)   C(20)   -158(1)  1_555 1_555 1_555 1_555 yes
   C(18)   Ru(2)   C(16)   C(21)   157(1)   1_555 1_555 1_555 1_555 yes
   C(18)   Ru(2)   C(17)   C(22)   121(1)   1_555 1_555 1_555 1_555 yes
   C(18)   C(14)   C(15)   C(20)   -177(1)  1_555 1_555 1_555 1_555 yes
   C(18)   C(17)   C(16)   C(21)   174(1)   1_555 1_555 1_555 1_555 yes
   C(19)   C(14)   C(15)   C(20)   -2(1)    1_555 1_555 1_555 1_555 yes
   C(19)   C(14)   C(18)   C(23)   1(1)     1_555 1_555 1_555 1_555 yes
   C(20)   C(15)   C(16)   C(21)   3(1)     1_555 1_555 1_555 1_555 yes
   C(21)   C(16)   C(17)   C(22)   -2(2)    1_555 1_555 1_555 1_555 yes
   C(22)   C(17)   C(18)   C(23)   0(1)     1_555 1_555 1_555 1_555 yes
   C(24)   P(1)    C(30)   C(31)   -107.7(9) 1_555 1_555 1_555 1_555 yes
   C(24)   P(1)    C(30)   C(35)   76.7(9)  1_555 1_555 1_555 1_555 yes
   C(24)   P(1)    C(36)   C(37)   -173.7(8) 1_555 1_555 1_555 1_555 yes
   C(24)   P(1)    C(36)   C(41)   4(1)     1_555 1_555 1_555 1_555 yes
   C(24)   C(25)   C(26)   C(27)   1(2)     1_555 1_555 1_555 1_555 yes
   C(24)   C(29)   C(28)   C(27)   0(2)     1_555 1_555 1_555 1_555 yes
   C(25)   C(24)   P(1)    C(30)   -13(1)   1_555 1_555 1_555 1_555 yes
   C(25)   C(24)   P(1)    C(36)   -122(1)  1_555 1_555 1_555 1_555 yes
   C(25)   C(24)   C(29)   C(28)   0(1)     1_555 1_555 1_555 1_555 yes
   C(25)   C(26)   C(27)   C(28)   -2(2)    1_555 1_555 1_555 1_555 yes
   C(26)   C(25)   C(24)   C(29)   0(1)     1_555 1_555 1_555 1_555 yes
   C(26)   C(27)   C(28)   C(29)   2(2)     1_555 1_555 1_555 1_555 yes
   C(29)   C(24)   P(1)    C(30)   171.3(9) 1_555 1_555 1_555 1_555 yes
   C(29)   C(24)   P(1)    C(36)   62.4(9)  1_555 1_555 1_555 1_555 yes
   C(30)   P(1)    C(36)   C(37)   77.2(9)  1_555 1_555 1_555 1_555 yes
   C(30)   P(1)    C(36)   C(41)   -105.0(10) 1_555 1_555 1_555 1_555 yes
   C(30)   C(31)   C(32)   C(33)   0(2)     1_555 1_555 1_555 1_555 yes
   C(30)   C(35)   C(34)   C(33)   -2(1)    1_555 1_555 1_555 1_555 yes
   C(31)   C(30)   P(1)    C(36)   3(1)     1_555 1_555 1_555 1_555 yes
   C(31)   C(30)   C(35)   C(34)   0(1)     1_555 1_555 1_555 1_555 yes
   C(31)   C(32)   C(33)   C(34)   -2(2)    1_555 1_555 1_555 1_555 yes
   C(32)   C(31)   C(30)   C(35)   0(1)     1_555 1_555 1_555 1_555 yes
   C(32)   C(33)   C(34)   C(35)   3(2)     1_555 1_555 1_555 1_555 yes
   C(35)   C(30)   P(1)    C(36)   -172.5(9) 1_555 1_555 1_555 1_555 yes
   C(36)   C(37)   C(38)   C(39)   -2(1)    1_555 1_555 1_555 1_555 yes
   C(36)   C(41)   C(40)   C(39)   -3(1)    1_555 1_555 1_555 1_555 yes
   C(37)   C(36)   C(41)   C(40)   1(1)     1_555 1_555 1_555 1_555 yes
   C(37)   C(38)   C(39)   C(40)   0(2)     1_555 1_555 1_555 1_555 yes
   C(38)   C(37)   C(36)   C(41)   1(1)     1_555 1_555 1_555 1_555 yes
   C(38)   C(39)   C(40)   C(41)   3(2)     1_555 1_555 1_555 1_555 yes
#------------------------------------------------------------------------------
loop_
_geom_contact_atom_site_label_1
_geom_contact_atom_site_label_2
_geom_contact_distance
_geom_contact_site_symmetry_1
_geom_contact_site_symmetry_2
_geom_contact_publ_flag
 Pd(1)     Pd(2)     2.780(1)   1_555 1_555 ?
 Pd(1)     Ru(1)     3.076(1)   1_555 1_555 ?
 Pd(1)     Ru(2)     2.947(1)   1_555 1_555 ?
 Pd(2)     Ru(1)     2.975(1)   1_555 1_555 ?
 Pd(2)     Ru(2)     2.831(1)   1_555 1_555 ?
 Pd(2)     Br(1)     2.505(1)   1_555 1_555 ?
 Ru(1)     Ru(2)     2.631(1)   1_555 1_555 ?
 C(22)     C(40)     3.41(2)    1_555 1_455 ?
#------------------------------------------------------------------------------

_publ_contact_author_name           'Yasushi MIZOBE'

_publ_contact_author_address
;
    Institute of Industrial Science, The University of Tokyo, 
Komaba, Meguro-ku, Tokyo 152-8505, JAPAN
;
_publ_contact_author_email            'ymizobe@iis.u-tokyo.ac.jp'
_publ_contact_author_fax              '+81-3-5452-6361'
_publ_contact_author_phone            '+81-3-5452-6360'
_publ_contact_letter
;
    ENTER TEXT OF LETTER
;
_publ_requested_journal               'Organometallics'
_publ_requested_category              ' CHOOSE FI FM FO CI CM CO or AD'

_publ_requested_coeditor_name          ?

_publ_section_title
;
    Structures and Reactivities of Palladium-Ruthenium 
Mixed-Metal Sulfido Clusters Derived from 
Disulfido- or Hydrosulfido-Bridged Diruthenium Complexes
;

_publ_section_title_footnote
;
    ENTER FOOTNOTE TO TITLE OF PAPER
;
loop_
_publ_author_name
_publ_author_footnote
_publ_author_address'Shigeki KUWATA'
;
;

;
  Department of Applied Chemistry, 
Graduate School of Science and Engineering, 
Tokyo Institute of Technology, O-okayama, 
Meguro-ku, Tokyo 152-8552, JAPAN
;

_publ_section_synopsis
;
    ENTER SYNOPSIS
;

_publ_section_abstract
;
    ENTER ABSTRACT
;

_publ_section_comment
;
    ENTER TEXT
;

_publ_section_acknowledgements
;
    ENTER ACKNOWLEDGEMENTS
;

_publ_section_experimental
;
    ENTER EXPERIMENTAL SECTION
;

_publ_section_references
;
    ENTER OTHER REFERENCES
Molecular Structure Corporation, Rigaku Corporation. (1998). teXsan. 
Single Crystal Structure Analysis Software. Version 1.9.
MSC, 3200 Research Forest Drive, The Woodlands, TX 77381, USA.
Rigaku, 3-9-12 Akishima, Tokyo, Japan.
North, A.C.T., Phillips, D. C. & Mathews, F. S. (1968).
Acta Cryst. A24, 351-359.
Zachariasen, W. H. (1967). Acta Cryst. 23, 558-564.
;

_publ_section_table_legends
;
    ENTER TABLE LEGENDS
;

_publ_section_figure_captions
;
    ENTER FIGURE CAPTIONS
;

_publ_section_exptl_prep
;
    ENTER COMPOUND PREPARATION DETAILS
;

_publ_section_exptl_refinement
;
    ENTER SPECIAL DETAILS OF THE REFINEMENT
;

#===END

data_compound5
#------------------------------------------------------------------------------
_audit_creation_date                  'Sat Aug 15 10:46:17 1998'
_audit_creation_method                'from TEXRAY.INF file'
_audit_update_record                   ?
#------------------------------------------------------------------------------
_computing_data_collection            'Rigaku/AFC Diffractometer Control'
_computing_cell_refinement            'Rigaku/AFC Diffractometer Control'
_computing_data_reduction             'teXsan'
_computing_structure_solution          ?
_computing_structure_refinement       'teXsan'
_computing_publication_material       'teXsan'
_computing_molecular_graphics          ?
#------------------------------------------------------------------------------
_chemical_compound_source              ?
_chemical_name_common                  ?
_chemical_formula_weight               1256.55
_chemical_formula_analytical           ?
_chemical_formula_sum                  'C39 H47 Br2 Cl2 P Pd2 Ru2 S2 '
_chemical_formula_moiety               '?'
_chemical_formula_structural           ?
_chemical_melting_point                ?
#------------------------------------------------------------------------------
_cell_length_a                         15.777(1)
_cell_length_b                         12.136(3)
_cell_length_c                         23.816(1)
_cell_angle_alpha                      90
_cell_angle_beta                       101.944(6)
_cell_angle_gamma                      90
_cell_volume                           4461(1)
_cell_formula_units_Z                  4
_cell_measurement_temperature          296.2
_cell_measurement_reflns_used          25
_cell_measurement_theta_min            13.7
_cell_measurement_theta_max            18.7
#------------------------------------------------------------------------------
_symmetry_cell_setting                 monoclinic
_symmetry_space_group_name_H-M        'P 21/c       '
_symmetry_Int_Tables_number            14
_symmetry_space_group_name_Hall        ?
loop_
_symmetry_equiv_pos_as_xyz
x,y,z
-x,1/2+y,1/2-z
-x,-y,-z
x,1/2-y,1/2+z
#------------------------------------------------------------------------------
_exptl_crystal_description            'XDIM'
_exptl_crystal_colour                 'darkbrown'
_exptl_crystal_size_max                0.400
_exptl_crystal_size_mid                0.300
_exptl_crystal_size_min                0.200
_exptl_crystal_density_diffrn          1.871
_exptl_crystal_density_method         'not measured'
_exptl_crystal_F_000                   2448.00
_exptl_absorpt_coefficient_mu          3.531
_exptl_absorpt_correction_type         psi-scan
_exptl_absorpt_process_details        '(North, Phillips & Mathews, 1968)'
_exptl_absorpt_correction_T_min        0.625
_exptl_absorpt_correction_T_max        1.000
_exptl_special_details
;
 ?
;
#------------------------------------------------------------------------------
_diffrn_special_details
;
 ?
;
_diffrn_ambient_temperature            296.2
_diffrn_radiation_wavelength           0.7107
_diffrn_radiation_type                'Mo K\a'
_diffrn_radiation_source              'Rigaku rotating anode'
_diffrn_radiation_monochromator        graphite
_diffrn_radiation_detector            'scintillation counter'
_diffrn_measurement_device_type       'Rigaku AFC7R'
_diffrn_measurement_method             \w-2\q

_diffrn_standards_number              3
_diffrn_standards_interval_count      150
_diffrn_standards_decay_%             -0.62
loop_
_diffrn_standard_refln_index_h
_diffrn_standard_refln_index_k
_diffrn_standard_refln_index_l
     -2       1      2
     -2      -1      2
     -1       2      4
_diffrn_reflns_number                  11102
_reflns_number_total                   10724
_reflns_number_gt                      5461
_reflns_observed_criterion             '>3.0sigma(I)'
_diffrn_reflns_av_R_equivalents        0.040
_diffrn_reflns_av_sigmaI/netI          0.000
_diffrn_reflns_limit_h_min             0
_diffrn_reflns_limit_h_max             20
_diffrn_reflns_limit_k_min             0
_diffrn_reflns_limit_k_max             15
_diffrn_reflns_limit_l_min             -30
_diffrn_reflns_limit_l_max             30
_diffrn_reflns_theta_min               0.00
_diffrn_reflns_theta_max               0.00
_diffrn_reflns_reduction_process      'Lp corrections applied'
_diffrn_orient_matrix_UB_11           -0.01089
_diffrn_orient_matrix_UB_12            0.01173
_diffrn_orient_matrix_UB_13            0.03947
_diffrn_orient_matrix_UB_21            0.02001
_diffrn_orient_matrix_UB_22            0.07806
_diffrn_orient_matrix_UB_23           -0.00083
_diffrn_orient_matrix_UB_31           -0.06065
_diffrn_orient_matrix_UB_32            0.02364
_diffrn_orient_matrix_UB_33           -0.01685
#------------------------------------------------------------------------------
loop_
_atom_type_symbol
_atom_type_description
_atom_type_scat_dispersion_real
_atom_type_scat_dispersion_imag
_atom_type_scat_source
  'C'  'C'   0.003 0.002 
;International Tables for Crystallography
(1992, Vol. C, Tables 4.2.6.8 and 6.1.1.1)
;
  'H'  'H'   0.000 0.000 
;International Tables for Crystallography
(1992, Vol. C, Table 6.1.1.2)
;
  'P'  'P'   0.102 0.094 
;International Tables for Crystallography
(1992, Vol. C, Tables 4.2.6.8 and 6.1.1.1)
;
  'S'  'S'   0.125 0.123 
;International Tables for Crystallography
(1992, Vol. C, Tables 4.2.6.8 and 6.1.1.1)
;
  'BrBr'   -0.290 2.459 
;International Tables for Crystallography
(1992, Vol. C, Tables 4.2.6.8 and 6.1.1.1)
;
  'PdPd'   -0.999 1.007 
;International Tables for Crystallography
(1992, Vol. C, Tables 4.2.6.8 and 6.1.1.1)
;
  'RuRu'   -1.259 0.836 
;International Tables for Crystallography
(1992, Vol. C, Tables 4.2.6.8 and 6.1.1.1)
;
  'ClCl'   0.148 0.159 
;International Tables for Crystallography
(1992, Vol. C, Tables 4.2.6.8 and 6.1.1.1)
;
#------------------------------------------------------------------------------
loop_
_atom_site_label
_atom_site_type_symbol
_atom_site_fract_x
_atom_site_fract_y
_atom_site_fract_z
_atom_site_U_iso_or_equiv
_atom_site_adp_type
_atom_site_occupancy
_atom_site_calc_flag
_atom_site_refinement_flags
_atom_site_disorder_assembly
_atom_site_disorder_group
 Pd(1)  Pd 0.76193(4)  0.55699(6)  0.45930(3)  0.0393(2)   Uani 1.00 d ...
 Pd(2)  Pd 0.78636(4)  0.59839(6)  0.34752(3)  0.0375(2)   Uani 1.00 d ...
 Ru(1)  Ru 0.65527(4)  0.73050(6)  0.39463(3)  0.0332(2)   Uani 1.00 d ...
 Ru(2)  Ru 0.82083(4)  0.77024(6)  0.43608(3)  0.0347(2)   Uani 1.00 d ...
 Br(1)  Br 0.81823(7)  0.41616(8)  0.39705(4)  0.0559(3)   Uani 1.00 d ...
 Br(2)  Br 0.74181(7)  0.44519(9)  0.54394(4)  0.0615(3)   Uani 1.00 d ...
 Cl(1)  Cl 0.6715(3)   0.1279(4)   0.4877(2)   0.154(2)    Uani 1.00 d ...
 Cl(2)  Cl 0.6048(4)   0.2122(4)   0.3782(3)   0.248(3)    Uani 1.00 d ...
 S(1)   S  0.7228(1)   0.7196(2)   0.48760(8)  0.0411(6)   Uani 1.00 d ...
 S(2)   S  0.7537(1)   0.7780(2)   0.34251(8)  0.0387(6)   Uani 1.00 d ...
 P      P  0.8061(2)   0.5648(2)   0.25659(9)  0.0431(7)   Uani 1.00 d ...
 C(1)   C  0.5437(6)   0.8120(8)   0.3426(4)   0.050(3)    Uani 1.00 d ...
 C(2)   C  0.5309(6)   0.8025(8)   0.3997(4)   0.051(3)    Uani 1.00 d ...
 C(3)   C  0.5267(5)   0.6905(8)   0.4129(4)   0.048(3)    Uani 1.00 d ...
 C(4)   C  0.5387(5)   0.6286(8)   0.3636(4)   0.048(3)    Uani 1.00 d ...
 C(5)   C  0.5484(5)   0.7056(8)   0.3201(4)   0.044(3)    Uani 1.00 d ...
 C(6)   C  0.5461(7)   0.918(1)    0.3103(5)   0.091(4)    Uani 1.00 d ...
 C(7)   C  0.5159(7)   0.898(1)    0.4380(5)   0.092(5)    Uani 1.00 d ...
 C(8)   C  0.5076(6)   0.643(1)    0.4667(4)   0.082(4)    Uani 1.00 d ...
 C(9)   C  0.5372(8)   0.5072(10)  0.3584(6)   0.099(5)    Uani 1.00 d ...
 C(10)  C  0.5583(7)   0.674(1)    0.2607(4)   0.085(4)    Uani 1.00 d ...
 C(11)  C  0.9316(5)   0.7719(9)   0.5095(4)   0.049(3)    Uani 1.00 d ...
 C(12)  C  0.9634(5)   0.7412(8)   0.4592(4)   0.047(3)    Uani 1.00 d ...
 C(13)  C  0.9461(6)   0.8319(9)   0.4200(4)   0.051(3)    Uani 1.00 d ...
 C(14)  C  0.9039(6)   0.9165(8)   0.4460(4)   0.051(3)    Uani 1.00 d ...
 C(15)  C  0.8965(6)   0.8789(8)   0.5015(4)   0.049(3)    Uani 1.00 d ...
 C(16)  C  0.9418(7)   0.7010(9)   0.5622(4)   0.068(4)    Uani 1.00 d ...
 C(17)  C  1.0104(6)   0.6380(10)  0.4508(4)   0.072(4)    Uani 1.00 d ...
 C(18)  C  0.9727(6)   0.8365(9)   0.3630(4)   0.068(4)    Uani 1.00 d ...
 C(19)  C  0.8804(7)   1.0276(8)   0.4211(5)   0.072(4)    Uani 1.00 d ...
 C(20)  C  0.8620(7)   0.9431(9)   0.5454(4)   0.077(4)    Uani 1.00 d ...
 C(21)  C  0.9215(6)   0.5727(8)   0.2546(4)   0.049(3)    Uani 1.00 d ...
 C(22)  C  0.9779(7)   0.5128(10)  0.2956(4)   0.069(4)    Uani 1.00 d ...
 C(23)  C  1.0667(7)   0.519(1)    0.2980(5)   0.101(5)    Uani 1.00 d ...
 C(24)  C  1.0989(7)   0.581(1)    0.2593(6)   0.097(5)    Uani 1.00 d ...
 C(25)  C  1.0432(8)   0.639(1)    0.2187(6)   0.089(5)    Uani 1.00 d ...
 C(26)  C  0.9551(7)   0.6339(9)   0.2158(4)   0.066(4)    Uani 1.00 d ...
 C(27)  C  0.7725(5)   0.4304(8)   0.2257(3)   0.045(3)    Uani 1.00 d ...
 C(28)  C  0.7127(6)   0.3672(8)   0.2471(4)   0.053(3)    Uani 1.00 d ...
 C(29)  C  0.6814(6)   0.2710(10)  0.2194(5)   0.069(4)    Uani 1.00 d ...
 C(30)  C  0.7083(8)   0.2362(10)  0.1717(5)   0.080(4)    Uani 1.00 d ...
 C(31)  C  0.7693(8)   0.295(1)    0.1502(5)   0.079(4)    Uani 1.00 d ...
 C(32)  C  0.7997(7)   0.3911(9)   0.1776(4)   0.065(4)    Uani 1.00 d ...
 C(33)  C  0.7515(6)   0.6587(8)   0.2009(3)   0.043(3)    Uani 1.00 d ...
 C(34)  C  0.7716(6)   0.7695(9)   0.2045(4)   0.054(3)    Uani 1.00 d ...
 C(35)  C  0.7260(7)   0.8435(9)   0.1647(4)   0.065(4)    Uani 1.00 d ...
 C(36)  C  0.6600(8)   0.809(1)    0.1221(4)   0.071(4)    Uani 1.00 d ...
 C(37)  C  0.6391(7)   0.697(1)    0.1186(4)   0.071(4)    Uani 1.00 d ...
 C(38)  C  0.6843(6)   0.6234(9)   0.1565(4)   0.059(3)    Uani 1.00 d ...
 C(39)  C  0.669(1)    0.231(1)    0.4393(6)   0.118(6)    Uani 1.00 d ...
 H(1)   H  0.5984      0.9215      0.2964      0.1087      Uiso 1.00 calc ...
 H(2)   H  0.4980      0.9206      0.2788      0.1087      Uiso 1.00 calc ...
 H(3)   H  0.5434      0.9785      0.3351      0.1087      Uiso 1.00 calc ...
 H(4)   H  0.5581      0.8957      0.4728      0.1100      Uiso 1.00 calc ...
 H(5)   H  0.5206      0.9656      0.4188      0.1100      Uiso 1.00 calc ...
 H(6)   H  0.4597      0.8919      0.4462      0.1100      Uiso 1.00 calc ...
 H(7)   H  0.4514      0.6648      0.4706      0.0982      Uiso 1.00 calc ...
 H(8)   H  0.5100      0.5645      0.4649      0.0982      Uiso 1.00 calc ...
 H(9)   H  0.5493      0.6681      0.4987      0.0982      Uiso 1.00 calc ...
 H(10)  H  0.5307      0.4755      0.3938      0.1190      Uiso 1.00 calc ...
 H(11)  H  0.4900      0.4856      0.3289      0.1190      Uiso 1.00 calc ...
 H(12)  H  0.5899      0.4825      0.3494      0.1190      Uiso 1.00 calc ...
 H(13)  H  0.5087      0.6345      0.2420      0.1025      Uiso 1.00 calc ...
 H(14)  H  0.5641      0.7393      0.2394      0.1025      Uiso 1.00 calc ...
 H(15)  H  0.6085      0.6299      0.2631      0.1025      Uiso 1.00 calc ...
 H(16)  H  0.8866      0.6874      0.5707      0.0816      Uiso 1.00 calc ...
 H(17)  H  0.9679      0.6329      0.5555      0.0816      Uiso 1.00 calc ...
 H(18)  H  0.9775      0.7377      0.5936      0.0816      Uiso 1.00 calc ...
 H(19)  H  1.0124      0.5907      0.4828      0.0868      Uiso 1.00 calc ...
 H(20)  H  0.9811      0.6018      0.4169      0.0868      Uiso 1.00 calc ...
 H(21)  H  1.0678      0.6555      0.4473      0.0868      Uiso 1.00 calc ...
 H(22)  H  1.0338      0.8288      0.3687      0.0815      Uiso 1.00 calc ...
 H(23)  H  0.9454      0.7783      0.3393      0.0815      Uiso 1.00 calc ...
 H(24)  H  0.9557      0.9052      0.3450      0.0815      Uiso 1.00 calc ...
 H(25)  H  0.9312      1.0643      0.4155      0.0864      Uiso 1.00 calc ...
 H(26)  H  0.8410      1.0201      0.3853      0.0864      Uiso 1.00 calc ...
 H(27)  H  0.8540      1.0692      0.4466      0.0864      Uiso 1.00 calc ...
 H(28)  H  0.9071      0.9548      0.5781      0.0920      Uiso 1.00 calc ...
 H(29)  H  0.8408      1.0122      0.5297      0.0920      Uiso 1.00 calc ...
 H(30)  H  0.8163      0.9031      0.5564      0.0920      Uiso 1.00 calc ...
 H(31)  H  0.9562      0.4676      0.3219      0.0828      Uiso 1.00 calc ...
 H(32)  H  1.1054      0.4802      0.3270      0.1215      Uiso 1.00 calc ...
 H(33)  H  1.1595      0.5838      0.2608      0.1161      Uiso 1.00 calc ...
 H(34)  H  1.0651      0.6829      0.1920      0.1064      Uiso 1.00 calc ...
 H(35)  H  0.9170      0.6735      0.1866      0.0788      Uiso 1.00 calc ...
 H(36)  H  0.6936      0.3901      0.2805      0.0641      Uiso 1.00 calc ...
 H(37)  H  0.6404      0.2283      0.2340      0.0830      Uiso 1.00 calc ...
 H(38)  H  0.6849      0.1706      0.1529      0.0957      Uiso 1.00 calc ...
 H(39)  H  0.7894      0.2706      0.1175      0.0943      Uiso 1.00 calc ...
 H(40)  H  0.8414      0.4325      0.1630      0.0780      Uiso 1.00 calc ...
 H(41)  H  0.8168      0.7955      0.2344      0.0654      Uiso 1.00 calc ...
 H(42)  H  0.7413      0.9194      0.1672      0.0777      Uiso 1.00 calc ...
 H(43)  H  0.6288      0.8596      0.0953      0.0857      Uiso 1.00 calc ...
 H(44)  H  0.5927      0.6724      0.0894      0.0852      Uiso 1.00 calc ...
 H(45)  H  0.6700      0.5473      0.1528      0.0702      Uiso 1.00 calc ...
 H(46)  H  0.6512      0.2961      0.4556      0.1417      Uiso 1.00 calc ...
 H(47)  H  0.7257      0.2399      0.4328      0.1417      Uiso 1.00 calc ...

loop_
_atom_site_aniso_label
_atom_site_aniso_U_11
_atom_site_aniso_U_22
_atom_site_aniso_U_33
_atom_site_aniso_U_12
_atom_site_aniso_U_13
_atom_site_aniso_U_23
 Pd(1)  0.0398(4)   0.0405(4)   0.0371(3)   0.0001(3)   0.0066(3)   0.0066(3)  
 Pd(2)  0.0381(4)   0.0417(4)   0.0324(3)   0.0015(3)   0.0069(3)   -0.0005(3) 
 Ru(1)  0.0282(3)   0.0346(4)   0.0354(3)   -0.0013(3)  0.0035(3)   0.0012(3)  
 Ru(2)  0.0301(4)   0.0380(4)   0.0347(3)   -0.0049(3)  0.0038(3)   -0.0022(3) 
 Br(1)  0.0675(7)   0.0446(6)   0.0558(6)   0.0104(5)   0.0136(5)   0.0048(5)  
 Br(2)  0.0790(8)   0.0547(7)   0.0542(6)   0.0003(6)   0.0219(5)   0.0164(5)  
 Cl(1)  0.152(4)    0.128(4)    0.185(4)    -0.015(3)   0.041(3)    0.035(4)   
 Cl(2)  0.324(8)    0.113(4)    0.224(6)    -0.084(5)   -0.140(5)   0.033(4)   
 S(1)   0.041(1)    0.050(1)    0.034(1)    -0.001(1)   0.0099(9)   -0.002(1)  
 S(2)   0.037(1)    0.042(1)    0.037(1)    -0.003(1)   0.0071(9)   0.003(1)   
 P      0.042(1)    0.051(2)    0.037(1)    0.001(1)    0.0095(10)  -0.005(1)  
 C(1)   0.036(5)    0.044(6)    0.064(6)    0.002(5)    -0.001(5)   0.012(5)   
 C(2)   0.039(5)    0.050(7)    0.062(6)    -0.003(5)   0.009(5)    -0.009(5)  
 C(3)   0.021(5)    0.062(7)    0.059(6)    -0.001(4)   0.003(4)    0.009(5)   
 C(4)   0.025(5)    0.039(6)    0.078(7)    -0.008(4)   0.004(4)    -0.005(5)  
 C(5)   0.031(5)    0.053(7)    0.044(5)    -0.004(4)   -0.003(4)   -0.009(5)  
 C(6)   0.061(7)    0.086(10)   0.117(9)    0.018(7)    -0.001(7)   0.047(8)   
 C(7)   0.077(8)    0.084(10)   0.118(10)   0.009(8)    0.032(8)    -0.039(8)  
 C(8)   0.041(6)    0.13(1)     0.082(8)    -0.010(7)   0.021(6)    0.039(7)   
 C(9)   0.090(10)   0.046(8)    0.15(1)     -0.015(7)   0.001(9)    -0.007(8)  
 C(10)  0.059(7)    0.14(1)     0.052(6)    -0.003(8)   0.004(5)    -0.019(7)  
 C(11)  0.033(5)    0.059(7)    0.049(5)    -0.013(5)   -0.003(4)   -0.008(5)  
 C(12)  0.025(4)    0.054(7)    0.058(6)    0.002(4)    -0.005(4)   -0.005(5)  
 C(13)  0.037(5)    0.058(7)    0.057(6)    -0.016(5)   0.006(4)    -0.010(5)  
 C(14)  0.039(5)    0.048(7)    0.067(6)    -0.022(5)   0.010(5)    0.000(5)   
 C(15)  0.037(5)    0.054(7)    0.051(5)    -0.012(5)   -0.002(4)   -0.018(5)  
 C(16)  0.067(7)    0.070(8)    0.060(6)    0.006(6)    -0.003(5)   0.003(6)   
 C(17)  0.046(6)    0.092(9)    0.073(7)    0.016(6)    0.000(5)    -0.008(7)  
 C(18)  0.047(6)    0.084(9)    0.078(7)    -0.018(6)   0.024(5)    -0.008(6)  
 C(19)  0.078(8)    0.037(7)    0.102(8)    -0.011(6)   0.022(7)    0.004(6)   
 C(20)  0.083(8)    0.067(8)    0.079(7)    -0.006(7)   0.013(6)    -0.029(6)  
 C(21)  0.049(6)    0.056(7)    0.042(5)    -0.001(5)   0.008(4)    -0.008(5)  
 C(22)  0.064(7)    0.080(9)    0.068(7)    0.007(7)    0.024(6)    0.008(6)   
 C(23)  0.043(7)    0.16(2)     0.096(9)    0.027(9)    0.016(7)    -0.003(10) 
 C(24)  0.044(7)    0.15(1)     0.11(1)     -0.024(8)   0.033(7)    -0.05(1)   
 C(25)  0.061(8)    0.11(1)     0.104(10)   -0.010(8)   0.037(7)    -0.009(9)  
 C(26)  0.054(7)    0.073(8)    0.070(7)    0.001(6)    0.014(5)    0.005(6)   
 C(27)  0.041(5)    0.052(6)    0.039(5)    0.013(5)    0.002(4)    -0.005(4)  
 C(28)  0.047(6)    0.055(7)    0.056(6)    -0.014(5)   0.004(5)    -0.017(5)  
 C(29)  0.050(6)    0.065(8)    0.090(8)    -0.007(6)   0.010(6)    -0.013(7)  
 C(30)  0.066(8)    0.060(8)    0.104(9)    0.002(7)    -0.006(7)   -0.035(7)  
 C(31)  0.080(9)    0.076(10)   0.079(8)    0.009(7)    0.014(7)    -0.032(7)  
 C(32)  0.074(7)    0.069(8)    0.058(6)    -0.006(6)   0.026(5)    -0.018(6)  
 C(33)  0.051(6)    0.051(6)    0.031(4)    0.006(5)    0.017(4)    0.000(4)   
 C(34)  0.060(6)    0.065(7)    0.041(5)    -0.006(6)   0.015(5)    0.008(5)   
 C(35)  0.083(8)    0.058(7)    0.059(6)    0.003(7)    0.029(6)    0.017(6)   
 C(36)  0.080(8)    0.086(9)    0.049(6)    0.018(7)    0.013(6)    0.015(6)   
 C(37)  0.075(8)    0.078(9)    0.054(6)    0.002(7)    -0.002(6)   0.001(6)   
 C(38)  0.049(6)    0.079(8)    0.042(5)    0.007(6)    -0.004(4)   -0.007(5)  
 C(39)  0.17(2)     0.09(1)     0.10(1)     -0.05(1)    0.05(1)     0.000(9)   
#------------------------------------------------------------------------------
_refine_special_details
;
;

_refine_ls_structure_factor_coef       F
_refine_ls_matrix_type                 full
_refine_ls_weighting_scheme            calc
_refine_ls_weighting_details
   'w = 1/[\s^2^(Fo) + 0.00010|Fo|^2^]'
_refine_ls_hydrogen_treatment          noref
_refine_ls_extinction_method           
   'Zachariasen(1967) type 2 Gaussian isotropic'
_refine_ls_extinction_coef             0.0021(1)
_refine_ls_abs_structure_details       ?
_refine_ls_abs_structure_Flack         ?
_refine_ls_number_reflns               5461
_refine_ls_number_parameters           452
_refine_ls_number_restraints           0
_refine_ls_number_constraints          0
_refine_ls_R_factor_all                0.0433
_refine_ls_R_factor_gt                 0.0433
_refine_ls_wR_factor_all               ?
_refine_ls_wR_factor_ref               0.0419
_refine_ls_wR_factor_gt                0.0419
_refine_ls_goodness_of_fit_all         ?
_refine_ls_goodness_of_fit_ref         1.379
_refine_ls_shift/su_max                0.0082
_refine_ls_shift/su_mean               0.0004
_refine_diff_density_min               -0.79
_refine_diff_density_max               0.91
#------------------------------------------------------------------------------
_geom_special_details
;
 ?
;
loop_
_geom_bond_atom_site_label_1
_geom_bond_atom_site_label_2
_geom_bond_distance
_geom_bond_site_symmetry_1
_geom_bond_site_symmetry_2
_geom_bond_publ_flag
 Pd(1)     Pd(2)     2.8130(8)  1_555 1_555 yes
 Pd(1)     Ru(1)     2.9266(9)  1_555 1_555 yes
 Pd(1)     Ru(2)     2.842(1)   1_555 1_555 yes
 Pd(1)     Br(1)     2.540(1)   1_555 1_555 yes
 Pd(1)     Br(2)     2.504(1)   1_555 1_555 yes
 Pd(1)     S(1)      2.214(2)   1_555 1_555 yes
 Pd(2)     Ru(1)     3.0112(9)  1_555 1_555 yes
 Pd(2)     Ru(2)     2.9359(9)  1_555 1_555 yes
 Pd(2)     Br(1)     2.508(1)   1_555 1_555 yes
 Pd(2)     S(2)      2.237(2)   1_555 1_555 yes
 Pd(2)     P         2.287(2)   1_555 1_555 yes
 Ru(1)     Ru(2)     2.6386(9)  1_555 1_555 yes
 Ru(1)     S(1)      2.254(2)   1_555 1_555 yes
 Ru(1)     S(2)      2.254(2)   1_555 1_555 yes
 Ru(1)     C(1)      2.170(9)   1_555 1_555 yes
 Ru(1)     C(2)      2.174(9)   1_555 1_555 yes
 Ru(1)     C(3)      2.214(8)   1_555 1_555 yes
 Ru(1)     C(4)      2.213(8)   1_555 1_555 yes
 Ru(1)     C(5)      2.202(8)   1_555 1_555 yes
 Ru(2)     S(1)      2.249(2)   1_555 1_555 yes
 Ru(2)     S(2)      2.263(2)   1_555 1_555 yes
 Ru(2)     C(11)     2.201(8)   1_555 1_555 yes
 Ru(2)     C(12)     2.230(8)   1_555 1_555 yes
 Ru(2)     C(13)     2.220(9)   1_555 1_555 yes
 Ru(2)     C(14)     2.191(9)   1_555 1_555 yes
 Ru(2)     C(15)     2.195(8)   1_555 1_555 yes
 Cl(1)     C(39)     1.69(1)    1_555 1_555 yes
 Cl(2)     C(39)     1.61(1)    1_555 1_555 yes
 P         C(21)     1.834(9)   1_555 1_555 yes
 P         C(27)     1.822(9)   1_555 1_555 yes
 P         C(33)     1.824(9)   1_555 1_555 yes
 C(1)      C(2)      1.42(1)    1_555 1_555 yes
 C(1)      C(5)      1.41(1)    1_555 1_555 yes
 C(1)      C(6)      1.50(1)    1_555 1_555 yes
 C(2)      C(3)      1.40(1)    1_555 1_555 yes
 C(2)      C(7)      1.52(1)    1_555 1_555 yes
 C(3)      C(4)      1.44(1)    1_555 1_555 yes
 C(3)      C(8)      1.49(1)    1_555 1_555 yes
 C(4)      C(5)      1.43(1)    1_555 1_555 yes
 C(4)      C(9)      1.48(1)    1_555 1_555 yes
 C(5)      C(10)     1.50(1)    1_555 1_555 yes
 C(11)     C(12)     1.44(1)    1_555 1_555 yes
 C(11)     C(15)     1.41(1)    1_555 1_555 yes
 C(11)     C(16)     1.50(1)    1_555 1_555 yes
 C(12)     C(13)     1.43(1)    1_555 1_555 yes
 C(12)     C(17)     1.49(1)    1_555 1_555 yes
 C(13)     C(14)     1.43(1)    1_555 1_555 yes
 C(13)     C(18)     1.50(1)    1_555 1_555 yes
 C(14)     C(15)     1.43(1)    1_555 1_555 yes
 C(14)     C(19)     1.49(1)    1_555 1_555 yes
 C(15)     C(20)     1.49(1)    1_555 1_555 yes
 C(21)     C(22)     1.38(1)    1_555 1_555 yes
 C(21)     C(26)     1.37(1)    1_555 1_555 yes
 C(22)     C(23)     1.39(1)    1_555 1_555 yes
 C(23)     C(24)     1.37(2)    1_555 1_555 yes
 C(24)     C(25)     1.36(2)    1_555 1_555 yes
 C(25)     C(26)     1.38(1)    1_555 1_555 yes
 C(27)     C(28)     1.39(1)    1_555 1_555 yes
 C(27)     C(32)     1.39(1)    1_555 1_555 yes
 C(28)     C(29)     1.38(1)    1_555 1_555 yes
 C(29)     C(30)     1.36(1)    1_555 1_555 yes
 C(30)     C(31)     1.38(2)    1_555 1_555 yes
 C(31)     C(32)     1.37(1)    1_555 1_555 yes
 C(33)     C(34)     1.38(1)    1_555 1_555 yes
 C(33)     C(38)     1.40(1)    1_555 1_555 yes
 C(34)     C(35)     1.39(1)    1_555 1_555 yes
 C(35)     C(36)     1.36(1)    1_555 1_555 yes
 C(36)     C(37)     1.39(2)    1_555 1_555 yes
 C(37)     C(38)     1.37(1)    1_555 1_555 yes
#------------------------------------------------------------------------------
loop_
_geom_angle_atom_site_label_1
_geom_angle_atom_site_label_2
_geom_angle_atom_site_label_3
_geom_angle
_geom_angle_site_symmetry_1
_geom_angle_site_symmetry_2
_geom_angle_site_symmetry_3
_geom_angle_publ_flag
   Pd(2)     Pd(1)     Ru(1)     63.25(2)   1_555 1_555 1_555 yes
   Pd(2)     Pd(1)     Ru(2)     62.55(2)   1_555 1_555 1_555 yes
   Pd(2)     Pd(1)     Br(1)     55.59(3)   1_555 1_555 1_555 yes
   Pd(2)     Pd(1)     Br(2)     157.47(4)  1_555 1_555 1_555 yes
   Pd(2)     Pd(1)     S(1)      103.31(6)  1_555 1_555 1_555 yes
   Ru(1)     Pd(1)     Ru(2)     54.41(2)   1_555 1_555 1_555 yes
   Ru(1)     Pd(1)     Br(1)     114.16(3)  1_555 1_555 1_555 yes
   Ru(1)     Pd(1)     Br(2)     131.20(4)  1_555 1_555 1_555 yes
   Ru(1)     Pd(1)     S(1)      49.67(5)   1_555 1_555 1_555 yes
   Ru(2)     Pd(1)     Br(1)     109.34(3)  1_555 1_555 1_555 yes
   Ru(2)     Pd(1)     Br(2)     138.67(4)  1_555 1_555 1_555 yes
   Ru(2)     Pd(1)     S(1)      50.99(6)   1_555 1_555 1_555 yes
   Br(1)     Pd(1)     Br(2)     102.90(4)  1_555 1_555 1_555 yes
   Br(1)     Pd(1)     S(1)      158.51(6)  1_555 1_555 1_555 yes
   Br(2)     Pd(1)     S(1)      98.52(6)   1_555 1_555 1_555 yes
   Pd(1)     Pd(2)     Ru(1)     60.22(2)   1_555 1_555 1_555 yes
   Pd(1)     Pd(2)     Ru(2)     59.22(2)   1_555 1_555 1_555 yes
   Pd(1)     Pd(2)     Br(1)     56.68(3)   1_555 1_555 1_555 yes
   Pd(1)     Pd(2)     S(2)      98.59(6)   1_555 1_555 1_555 yes
   Pd(1)     Pd(2)     P         159.43(7)  1_555 1_555 1_555 yes
   Ru(1)     Pd(2)     Ru(2)     52.66(2)   1_555 1_555 1_555 yes
   Ru(1)     Pd(2)     Br(1)     112.37(3)  1_555 1_555 1_555 yes
   Ru(1)     Pd(2)     S(2)      48.15(5)   1_555 1_555 1_555 yes
   Ru(1)     Pd(2)     P         133.33(7)  1_555 1_555 1_555 yes
   Ru(2)     Pd(2)     Br(1)     107.41(3)  1_555 1_555 1_555 yes
   Ru(2)     Pd(2)     S(2)      49.65(5)   1_555 1_555 1_555 yes
   Ru(2)     Pd(2)     P         139.97(7)  1_555 1_555 1_555 yes
   Br(1)     Pd(2)     S(2)      154.92(6)  1_555 1_555 1_555 yes
   Br(1)     Pd(2)     P         103.58(7)  1_555 1_555 1_555 yes
   S(2)      Pd(2)     P         101.44(8)  1_555 1_555 1_555 yes
   Pd(1)     Ru(1)     Pd(2)     56.53(2)   1_555 1_555 1_555 yes
   Pd(1)     Ru(1)     Ru(2)     61.17(2)   1_555 1_555 1_555 yes
   Pd(1)     Ru(1)     S(1)      48.48(6)   1_555 1_555 1_555 yes
   Pd(1)     Ru(1)     S(2)      94.99(6)   1_555 1_555 1_555 yes
   Pd(1)     Ru(1)     C(1)      159.8(3)   1_555 1_555 1_555 yes
   Pd(1)     Ru(1)     C(2)      133.4(3)   1_555 1_555 1_555 yes
   Pd(1)     Ru(1)     C(3)      100.9(2)   1_555 1_555 1_555 yes
   Pd(1)     Ru(1)     C(4)      97.0(2)    1_555 1_555 1_555 yes
   Pd(1)     Ru(1)     C(5)      125.9(3)   1_555 1_555 1_555 yes
   Pd(2)     Ru(1)     Ru(2)     62.20(2)   1_555 1_555 1_555 yes
   Pd(2)     Ru(1)     S(1)      96.49(6)   1_555 1_555 1_555 yes
   Pd(2)     Ru(1)     S(2)      47.65(6)   1_555 1_555 1_555 yes
   Pd(2)     Ru(1)     C(1)      124.6(3)   1_555 1_555 1_555 yes
   Pd(2)     Ru(1)     C(2)      158.8(2)   1_555 1_555 1_555 yes
   Pd(2)     Ru(1)     C(3)      133.2(3)   1_555 1_555 1_555 yes
   Pd(2)     Ru(1)     C(4)      99.5(2)    1_555 1_555 1_555 yes
   Pd(2)     Ru(1)     C(5)      95.6(2)    1_555 1_555 1_555 yes
   Ru(2)     Ru(1)     S(1)      54.05(6)   1_555 1_555 1_555 yes
   Ru(2)     Ru(1)     S(2)      54.40(5)   1_555 1_555 1_555 yes
   Ru(2)     Ru(1)     C(1)      138.9(2)   1_555 1_555 1_555 yes
   Ru(2)     Ru(1)     C(2)      137.8(2)   1_555 1_555 1_555 yes
   Ru(2)     Ru(1)     C(3)      147.4(2)   1_555 1_555 1_555 yes
   Ru(2)     Ru(1)     C(4)      156.5(2)   1_555 1_555 1_555 yes
   Ru(2)     Ru(1)     C(5)      149.4(2)   1_555 1_555 1_555 yes
   S(1)      Ru(1)     S(2)      108.44(8)  1_555 1_555 1_555 yes
   S(1)      Ru(1)     C(1)      138.6(3)   1_555 1_555 1_555 yes
   S(1)      Ru(1)     C(2)      102.6(3)   1_555 1_555 1_555 yes
   S(1)      Ru(1)     C(3)      93.4(2)    1_555 1_555 1_555 yes
   S(1)      Ru(1)     C(4)      119.1(3)   1_555 1_555 1_555 yes
   S(1)      Ru(1)     C(5)      155.7(2)   1_555 1_555 1_555 yes
   S(2)      Ru(1)     C(1)      98.0(3)    1_555 1_555 1_555 yes
   S(2)      Ru(1)     C(2)      131.4(3)   1_555 1_555 1_555 yes
   S(2)      Ru(1)     C(3)      158.1(2)   1_555 1_555 1_555 yes
   S(2)      Ru(1)     C(4)      125.3(3)   1_555 1_555 1_555 yes
   S(2)      Ru(1)     C(5)      95.2(2)    1_555 1_555 1_555 yes
   C(1)      Ru(1)     C(2)      38.2(3)    1_555 1_555 1_555 yes
   C(1)      Ru(1)     C(3)      62.9(3)    1_555 1_555 1_555 yes
   C(1)      Ru(1)     C(4)      62.9(3)    1_555 1_555 1_555 yes
   C(1)      Ru(1)     C(5)      37.5(3)    1_555 1_555 1_555 yes
   C(2)      Ru(1)     C(3)      37.2(3)    1_555 1_555 1_555 yes
   C(2)      Ru(1)     C(4)      63.0(3)    1_555 1_555 1_555 yes
   C(2)      Ru(1)     C(5)      63.3(3)    1_555 1_555 1_555 yes
   C(3)      Ru(1)     C(4)      38.0(3)    1_555 1_555 1_555 yes
   C(3)      Ru(1)     C(5)      63.2(3)    1_555 1_555 1_555 yes
   C(4)      Ru(1)     C(5)      37.7(3)    1_555 1_555 1_555 yes
   Pd(1)     Ru(2)     Pd(2)     58.24(2)   1_555 1_555 1_555 yes
   Pd(1)     Ru(2)     Ru(1)     64.42(2)   1_555 1_555 1_555 yes
   Pd(1)     Ru(2)     S(1)      49.89(6)   1_555 1_555 1_555 yes
   Pd(1)     Ru(2)     S(2)      97.13(6)   1_555 1_555 1_555 yes
   Pd(1)     Ru(2)     C(11)     95.3(3)    1_555 1_555 1_555 yes
   Pd(1)     Ru(2)     C(12)     99.3(3)    1_555 1_555 1_555 yes
   Pd(1)     Ru(2)     C(13)     132.8(3)   1_555 1_555 1_555 yes
   Pd(1)     Ru(2)     C(14)     158.4(3)   1_555 1_555 1_555 yes
   Pd(1)     Ru(2)     C(15)     124.1(3)   1_555 1_555 1_555 yes
   Pd(2)     Ru(2)     Ru(1)     65.14(2)   1_555 1_555 1_555 yes
   Pd(2)     Ru(2)     S(1)      98.73(6)   1_555 1_555 1_555 yes
   Pd(2)     Ru(2)     S(2)      48.89(6)   1_555 1_555 1_555 yes
   Pd(2)     Ru(2)     C(11)     125.1(3)   1_555 1_555 1_555 yes
   Pd(2)     Ru(2)     C(12)     95.3(2)    1_555 1_555 1_555 yes
   Pd(2)     Ru(2)     C(13)     98.9(2)    1_555 1_555 1_555 yes
   Pd(2)     Ru(2)     C(14)     132.1(2)   1_555 1_555 1_555 yes
   Pd(2)     Ru(2)     C(15)     158.3(2)   1_555 1_555 1_555 yes
   Ru(1)     Ru(2)     S(1)      54.21(6)   1_555 1_555 1_555 yes
   Ru(1)     Ru(2)     S(2)      54.11(5)   1_555 1_555 1_555 yes
   Ru(1)     Ru(2)     C(11)     149.4(2)   1_555 1_555 1_555 yes
   Ru(1)     Ru(2)     C(12)     158.9(2)   1_555 1_555 1_555 yes
   Ru(1)     Ru(2)     C(13)     147.6(2)   1_555 1_555 1_555 yes
   Ru(1)     Ru(2)     C(14)     135.4(3)   1_555 1_555 1_555 yes
   Ru(1)     Ru(2)     C(15)     136.5(2)   1_555 1_555 1_555 yes
   S(1)      Ru(2)     S(2)      108.31(8)  1_555 1_555 1_555 yes
   S(1)      Ru(2)     C(11)     95.3(2)    1_555 1_555 1_555 yes
   S(1)      Ru(2)     C(12)     126.5(2)   1_555 1_555 1_555 yes
   S(1)      Ru(2)     C(13)     157.5(2)   1_555 1_555 1_555 yes
   S(1)      Ru(2)     C(14)     128.8(3)   1_555 1_555 1_555 yes
   S(1)      Ru(2)     C(15)     96.4(2)    1_555 1_555 1_555 yes
   S(2)      Ru(2)     C(11)     156.1(2)   1_555 1_555 1_555 yes
   S(2)      Ru(2)     C(12)     119.5(2)   1_555 1_555 1_555 yes
   S(2)      Ru(2)     C(13)     93.9(2)    1_555 1_555 1_555 yes
   S(2)      Ru(2)     C(14)     102.7(3)   1_555 1_555 1_555 yes
   S(2)      Ru(2)     C(15)     138.5(3)   1_555 1_555 1_555 yes
   C(11)     Ru(2)     C(12)     37.9(3)    1_555 1_555 1_555 yes
   C(11)     Ru(2)     C(13)     62.9(3)    1_555 1_555 1_555 yes
   C(11)     Ru(2)     C(14)     63.1(4)    1_555 1_555 1_555 yes
   C(11)     Ru(2)     C(15)     37.4(3)    1_555 1_555 1_555 yes
   C(12)     Ru(2)     C(13)     37.6(3)    1_555 1_555 1_555 yes
   C(12)     Ru(2)     C(14)     63.3(4)    1_555 1_555 1_555 yes
   C(12)     Ru(2)     C(15)     63.1(3)    1_555 1_555 1_555 yes
   C(13)     Ru(2)     C(14)     37.9(3)    1_555 1_555 1_555 yes
   C(13)     Ru(2)     C(15)     63.1(3)    1_555 1_555 1_555 yes
   C(14)     Ru(2)     C(15)     38.0(3)    1_555 1_555 1_555 yes
   Pd(1)     Br(1)     Pd(2)     67.73(3)   1_555 1_555 1_555 yes
   Pd(1)     S(1)      Ru(1)     81.85(7)   1_555 1_555 1_555 yes
   Pd(1)     S(1)      Ru(2)     79.12(7)   1_555 1_555 1_555 yes
   Ru(1)     S(1)      Ru(2)     71.75(6)   1_555 1_555 1_555 yes
   Pd(2)     S(2)      Ru(1)     84.20(8)   1_555 1_555 1_555 yes
   Pd(2)     S(2)      Ru(2)     81.46(7)   1_555 1_555 1_555 yes
   Ru(1)     S(2)      Ru(2)     71.49(6)   1_555 1_555 1_555 yes
   Pd(2)     P         C(21)     110.2(3)   1_555 1_555 1_555 yes
   Pd(2)     P         C(27)     117.2(3)   1_555 1_555 1_555 yes
   Pd(2)     P         C(33)     116.2(3)   1_555 1_555 1_555 yes
   C(21)     P         C(27)     104.1(4)   1_555 1_555 1_555 yes
   C(21)     P         C(33)     105.7(4)   1_555 1_555 1_555 yes
   C(27)     P         C(33)     102.2(4)   1_555 1_555 1_555 yes
   Ru(1)     C(1)      C(2)      71.1(5)    1_555 1_555 1_555 yes
   Ru(1)     C(1)      C(5)      72.5(5)    1_555 1_555 1_555 yes
   Ru(1)     C(1)      C(6)      125.4(7)   1_555 1_555 1_555 yes
   C(2)      C(1)      C(5)      108.7(8)   1_555 1_555 1_555 yes
   C(2)      C(1)      C(6)      125.8(10)  1_555 1_555 1_555 yes
   C(5)      C(1)      C(6)      125.5(9)   1_555 1_555 1_555 yes
   Ru(1)     C(2)      C(1)      70.8(5)    1_555 1_555 1_555 yes
   Ru(1)     C(2)      C(3)      73.0(5)    1_555 1_555 1_555 yes
   Ru(1)     C(2)      C(7)      126.4(7)   1_555 1_555 1_555 yes
   C(1)      C(2)      C(3)      108.5(8)   1_555 1_555 1_555 yes
   C(1)      C(2)      C(7)      125.6(10)  1_555 1_555 1_555 yes
   C(3)      C(2)      C(7)      125.7(9)   1_555 1_555 1_555 yes
   Ru(1)     C(3)      C(2)      69.8(5)    1_555 1_555 1_555 yes
   Ru(1)     C(3)      C(4)      71.0(5)    1_555 1_555 1_555 yes
   Ru(1)     C(3)      C(8)      127.6(6)   1_555 1_555 1_555 yes
   C(2)      C(3)      C(4)      107.7(8)   1_555 1_555 1_555 yes
   C(2)      C(3)      C(8)      126.7(10)  1_555 1_555 1_555 yes
   C(4)      C(3)      C(8)      125.5(10)  1_555 1_555 1_555 yes
   Ru(1)     C(4)      C(3)      71.1(5)    1_555 1_555 1_555 yes
   Ru(1)     C(4)      C(5)      70.7(5)    1_555 1_555 1_555 yes
   Ru(1)     C(4)      C(9)      125.6(7)   1_555 1_555 1_555 yes
   C(3)      C(4)      C(5)      107.6(8)   1_555 1_555 1_555 yes
   C(3)      C(4)      C(9)      125(1)     1_555 1_555 1_555 yes
   C(5)      C(4)      C(9)      126.5(10)  1_555 1_555 1_555 yes
   Ru(1)     C(5)      C(1)      70.0(5)    1_555 1_555 1_555 yes
   Ru(1)     C(5)      C(4)      71.6(5)    1_555 1_555 1_555 yes
   Ru(1)     C(5)      C(10)     125.6(6)   1_555 1_555 1_555 yes
   C(1)      C(5)      C(4)      107.6(8)   1_555 1_555 1_555 yes
   C(1)      C(5)      C(10)     127.9(9)   1_555 1_555 1_555 yes
   C(4)      C(5)      C(10)     124.5(9)   1_555 1_555 1_555 yes
   C(1)      C(6)      H(1)      109.5(10)  1_555 1_555 1_555 no
   C(1)      C(6)      H(2)      109(1)     1_555 1_555 1_555 no
   C(1)      C(6)      H(3)      109(1)     1_555 1_555 1_555 no
   H(1)      C(6)      H(2)      109(1)     1_555 1_555 1_555 no
   H(1)      C(6)      H(3)      109(1)     1_555 1_555 1_555 no
   H(2)      C(6)      H(3)      109(1)     1_555 1_555 1_555 no
   C(2)      C(7)      H(4)      109(1)     1_555 1_555 1_555 no
   C(2)      C(7)      H(5)      109(1)     1_555 1_555 1_555 no
   C(2)      C(7)      H(6)      109(1)     1_555 1_555 1_555 no
   H(4)      C(7)      H(5)      109(1)     1_555 1_555 1_555 no
   H(4)      C(7)      H(6)      109(1)     1_555 1_555 1_555 no
   H(5)      C(7)      H(6)      109(1)     1_555 1_555 1_555 no
   C(3)      C(8)      H(7)      109.5(9)   1_555 1_555 1_555 no
   C(3)      C(8)      H(8)      109(1)     1_555 1_555 1_555 no
   C(3)      C(8)      H(9)      109.5(9)   1_555 1_555 1_555 no
   H(7)      C(8)      H(8)      109(1)     1_555 1_555 1_555 no
   H(7)      C(8)      H(9)      109(1)     1_555 1_555 1_555 no
   H(8)      C(8)      H(9)      109(1)     1_555 1_555 1_555 no
   C(4)      C(9)      H(10)     109(1)     1_555 1_555 1_555 no
   C(4)      C(9)      H(11)     109(1)     1_555 1_555 1_555 no
   C(4)      C(9)      H(12)     109(1)     1_555 1_555 1_555 no
   H(10)     C(9)      H(11)     109(1)     1_555 1_555 1_555 no
   H(10)     C(9)      H(12)     109(1)     1_555 1_555 1_555 no
   H(11)     C(9)      H(12)     109(1)     1_555 1_555 1_555 no
   C(5)      C(10)     H(13)     109.5(9)   1_555 1_555 1_555 no
   C(5)      C(10)     H(14)     109(1)     1_555 1_555 1_555 no
   C(5)      C(10)     H(15)     109.5(9)   1_555 1_555 1_555 no
   H(13)     C(10)     H(14)     109(1)     1_555 1_555 1_555 no
   H(13)     C(10)     H(15)     109(1)     1_555 1_555 1_555 no
   H(14)     C(10)     H(15)     109(1)     1_555 1_555 1_555 no
   Ru(2)     C(11)     C(12)     72.1(5)    1_555 1_555 1_555 yes
   Ru(2)     C(11)     C(15)     71.1(5)    1_555 1_555 1_555 yes
   Ru(2)     C(11)     C(16)     126.0(6)   1_555 1_555 1_555 yes
   C(12)     C(11)     C(15)     108.8(8)   1_555 1_555 1_555 yes
   C(12)     C(11)     C(16)     123.4(9)   1_555 1_555 1_555 yes
   C(15)     C(11)     C(16)     127.7(9)   1_555 1_555 1_555 yes
   Ru(2)     C(12)     C(11)     70.0(5)    1_555 1_555 1_555 yes
   Ru(2)     C(12)     C(13)     70.8(5)    1_555 1_555 1_555 yes
   Ru(2)     C(12)     C(17)     127.2(7)   1_555 1_555 1_555 yes
   C(11)     C(12)     C(13)     107.0(8)   1_555 1_555 1_555 yes
   C(11)     C(12)     C(17)     126.7(9)   1_555 1_555 1_555 yes
   C(13)     C(12)     C(17)     126.2(9)   1_555 1_555 1_555 yes
   Ru(2)     C(13)     C(12)     71.6(5)    1_555 1_555 1_555 yes
   Ru(2)     C(13)     C(14)     69.9(5)    1_555 1_555 1_555 yes
   Ru(2)     C(13)     C(18)     126.4(6)   1_555 1_555 1_555 yes
   C(12)     C(13)     C(14)     108.1(8)   1_555 1_555 1_555 yes
   C(12)     C(13)     C(18)     124.5(9)   1_555 1_555 1_555 yes
   C(14)     C(13)     C(18)     127.3(10)  1_555 1_555 1_555 yes
   Ru(2)     C(14)     C(13)     72.2(5)    1_555 1_555 1_555 yes
   Ru(2)     C(14)     C(15)     71.2(5)    1_555 1_555 1_555 yes
   Ru(2)     C(14)     C(19)     126.7(7)   1_555 1_555 1_555 yes
   C(13)     C(14)     C(15)     107.8(9)   1_555 1_555 1_555 yes
   C(13)     C(14)     C(19)     125.2(9)   1_555 1_555 1_555 yes
   C(15)     C(14)     C(19)     126.7(9)   1_555 1_555 1_555 yes
   Ru(2)     C(15)     C(11)     71.5(5)    1_555 1_555 1_555 yes
   Ru(2)     C(15)     C(14)     70.8(5)    1_555 1_555 1_555 yes
   Ru(2)     C(15)     C(20)     126.0(6)   1_555 1_555 1_555 yes
   C(11)     C(15)     C(14)     108.3(8)   1_555 1_555 1_555 yes
   C(11)     C(15)     C(20)     125.2(9)   1_555 1_555 1_555 yes
   C(14)     C(15)     C(20)     126.4(10)  1_555 1_555 1_555 yes
   C(11)     C(16)     H(16)     109.5(9)   1_555 1_555 1_555 no
   C(11)     C(16)     H(17)     109.5(9)   1_555 1_555 1_555 no
   C(11)     C(16)     H(18)     109.5(10)  1_555 1_555 1_555 no
   H(16)     C(16)     H(17)     109(1)     1_555 1_555 1_555 no
   H(16)     C(16)     H(18)     109.5(10)  1_555 1_555 1_555 no
   H(17)     C(16)     H(18)     109.5(10)  1_555 1_555 1_555 no
   C(12)     C(17)     H(19)     109.5(9)   1_555 1_555 1_555 no
   C(12)     C(17)     H(20)     109.5(9)   1_555 1_555 1_555 no
   C(12)     C(17)     H(21)     109(1)     1_555 1_555 1_555 no
   H(19)     C(17)     H(20)     109(1)     1_555 1_555 1_555 no
   H(19)     C(17)     H(21)     109.5(9)   1_555 1_555 1_555 no
   H(20)     C(17)     H(21)     109.5(10)  1_555 1_555 1_555 no
   C(13)     C(18)     H(22)     109.5(9)   1_555 1_555 1_555 no
   C(13)     C(18)     H(23)     109.5(9)   1_555 1_555 1_555 no
   C(13)     C(18)     H(24)     109.5(10)  1_555 1_555 1_555 no
   H(22)     C(18)     H(23)     109(1)     1_555 1_555 1_555 no
   H(22)     C(18)     H(24)     109.5(10)  1_555 1_555 1_555 no
   H(23)     C(18)     H(24)     109(1)     1_555 1_555 1_555 no
   C(14)     C(19)     H(25)     109.5(10)  1_555 1_555 1_555 no
   C(14)     C(19)     H(26)     109.5(9)   1_555 1_555 1_555 no
   C(14)     C(19)     H(27)     109.5(10)  1_555 1_555 1_555 no
   H(25)     C(19)     H(26)     109(1)     1_555 1_555 1_555 no
   H(25)     C(19)     H(27)     109(1)     1_555 1_555 1_555 no
   H(26)     C(19)     H(27)     109(1)     1_555 1_555 1_555 no
   C(15)     C(20)     H(28)     109.5(10)  1_555 1_555 1_555 no
   C(15)     C(20)     H(29)     109.5(10)  1_555 1_555 1_555 no
   C(15)     C(20)     H(30)     109.5(9)   1_555 1_555 1_555 no
   H(28)     C(20)     H(29)     109(1)     1_555 1_555 1_555 no
   H(28)     C(20)     H(30)     109(1)     1_555 1_555 1_555 no
   H(29)     C(20)     H(30)     109(1)     1_555 1_555 1_555 no
   P         C(21)     C(22)     116.8(7)   1_555 1_555 1_555 yes
   P         C(21)     C(26)     124.7(8)   1_555 1_555 1_555 yes
   C(22)     C(21)     C(26)     118.5(9)   1_555 1_555 1_555 yes
   C(21)     C(22)     C(23)     119(1)     1_555 1_555 1_555 yes
   C(21)     C(22)     H(31)     120(1)     1_555 1_555 1_555 no
   C(23)     C(22)     H(31)     120(1)     1_555 1_555 1_555 no
   C(22)     C(23)     C(24)     120(1)     1_555 1_555 1_555 yes
   C(22)     C(23)     H(32)     119(1)     1_555 1_555 1_555 no
   C(24)     C(23)     H(32)     119(1)     1_555 1_555 1_555 no
   C(23)     C(24)     C(25)     119(1)     1_555 1_555 1_555 yes
   C(23)     C(24)     H(33)     120(1)     1_555 1_555 1_555 no
   C(25)     C(24)     H(33)     120(1)     1_555 1_555 1_555 no
   C(24)     C(25)     C(26)     120(1)     1_555 1_555 1_555 yes
   C(24)     C(25)     H(34)     119(1)     1_555 1_555 1_555 no
   C(26)     C(25)     H(34)     119(1)     1_555 1_555 1_555 no
   C(21)     C(26)     C(25)     121(1)     1_555 1_555 1_555 yes
   C(21)     C(26)     H(35)     119(1)     1_555 1_555 1_555 no
   C(25)     C(26)     H(35)     119(1)     1_555 1_555 1_555 no
   P         C(27)     C(28)     120.5(7)   1_555 1_555 1_555 yes
   P         C(27)     C(32)     121.8(8)   1_555 1_555 1_555 yes
   C(28)     C(27)     C(32)     117.5(9)   1_555 1_555 1_555 yes
   C(27)     C(28)     C(29)     119.6(9)   1_555 1_555 1_555 yes
   C(27)     C(28)     H(36)     120.2(9)   1_555 1_555 1_555 no
   C(29)     C(28)     H(36)     120(1)     1_555 1_555 1_555 no
   C(28)     C(29)     C(30)     121(1)     1_555 1_555 1_555 yes
   C(28)     C(29)     H(37)     119(1)     1_555 1_555 1_555 no
   C(30)     C(29)     H(37)     119(1)     1_555 1_555 1_555 no
   C(29)     C(30)     C(31)     120(1)     1_555 1_555 1_555 yes
   C(29)     C(30)     H(38)     119(1)     1_555 1_555 1_555 no
   C(31)     C(30)     H(38)     119(1)     1_555 1_555 1_555 no
   C(30)     C(31)     C(32)     117(1)     1_555 1_555 1_555 yes
   C(30)     C(31)     H(39)     121(1)     1_555 1_555 1_555 no
   C(32)     C(31)     H(39)     121(1)     1_555 1_555 1_555 no
   C(27)     C(32)     C(31)     123(1)     1_555 1_555 1_555 yes
   C(27)     C(32)     H(40)     118(1)     1_555 1_555 1_555 no
   C(31)     C(32)     H(40)     118(1)     1_555 1_555 1_555 no
   P         C(33)     C(34)     119.7(7)   1_555 1_555 1_555 yes
   P         C(33)     C(38)     121.8(8)   1_555 1_555 1_555 yes
   C(34)     C(33)     C(38)     118.3(9)   1_555 1_555 1_555 yes
   C(33)     C(34)     C(35)     120.4(9)   1_555 1_555 1_555 yes
   C(33)     C(34)     H(41)     119.8(10)  1_555 1_555 1_555 no
   C(35)     C(34)     H(41)     119(1)     1_555 1_555 1_555 no
   C(34)     C(35)     C(36)     120(1)     1_555 1_555 1_555 yes
   C(34)     C(35)     H(42)     119(1)     1_555 1_555 1_555 no
   C(36)     C(35)     H(42)     119(1)     1_555 1_555 1_555 no
   C(35)     C(36)     C(37)     118(1)     1_555 1_555 1_555 yes
   C(35)     C(36)     H(43)     120(1)     1_555 1_555 1_555 no
   C(37)     C(36)     H(43)     120(1)     1_555 1_555 1_555 no
   C(36)     C(37)     C(38)     120(1)     1_555 1_555 1_555 yes
   C(36)     C(37)     H(44)     119(1)     1_555 1_555 1_555 no
   C(38)     C(37)     H(44)     119(1)     1_555 1_555 1_555 no
   C(33)     C(38)     C(37)     120(1)     1_555 1_555 1_555 yes
   C(33)     C(38)     H(45)     119.7(10)  1_555 1_555 1_555 no
   C(37)     C(38)     H(45)     119.7(10)  1_555 1_555 1_555 no
   Cl(1)     C(39)     Cl(2)     116.0(9)   1_555 1_555 1_555 yes
   Cl(1)     C(39)     H(46)     107.8(10)  1_555 1_555 1_555 no
   Cl(1)     C(39)     H(47)     107(1)     1_555 1_555 1_555 no
   Cl(2)     C(39)     H(46)     107(1)     1_555 1_555 1_555 no
   Cl(2)     C(39)     H(47)     107(1)     1_555 1_555 1_555 no
   H(46)     C(39)     H(47)     109(1)     1_555 1_555 1_555 no
#------------------------------------------------------------------------------
loop_
_geom_torsion_atom_site_label_1
_geom_torsion_atom_site_label_2
_geom_torsion_atom_site_label_3
_geom_torsion_atom_site_label_4
_geom_torsion
_geom_torsion_site_symmetry_1
_geom_torsion_site_symmetry_2
_geom_torsion_site_symmetry_3
_geom_torsion_site_symmetry_4
_geom_torsion_publ_flag
   Pd(1)   Pd(2)   Ru(1)   Ru(2)   72.24(3) 1_555 1_555 1_555 1_555 yes
   Pd(1)   Pd(2)   Ru(1)   S(1)    28.96(6) 1_555 1_555 1_555 1_555 yes
   Pd(1)   Pd(2)   Ru(1)   S(2)    138.04(7) 1_555 1_555 1_555 1_555 yes
   Pd(1)   Pd(2)   Ru(1)   C(1)    -155.6(3) 1_555 1_555 1_555 1_555 yes
   Pd(1)   Pd(2)   Ru(1)   C(2)    -124.9(7) 1_555 1_555 1_555 1_555 yes
   Pd(1)   Pd(2)   Ru(1)   C(3)    -72.0(3) 1_555 1_555 1_555 1_555 yes
   Pd(1)   Pd(2)   Ru(1)   C(4)    -92.1(3) 1_555 1_555 1_555 1_555 yes
   Pd(1)   Pd(2)   Ru(1)   C(5)    -130.0(2) 1_555 1_555 1_555 1_555 yes
   Pd(1)   Pd(2)   Ru(2)   Ru(1)   -74.17(3) 1_555 1_555 1_555 1_555 yes
   Pd(1)   Pd(2)   Ru(2)   S(1)    -30.50(6) 1_555 1_555 1_555 1_555 yes
   Pd(1)   Pd(2)   Ru(2)   S(2)    -137.23(7) 1_555 1_555 1_555 1_555 yes
   Pd(1)   Pd(2)   Ru(2)   C(11)   72.3(3)  1_555 1_555 1_555 1_555 yes
   Pd(1)   Pd(2)   Ru(2)   C(12)   97.7(3)  1_555 1_555 1_555 1_555 yes
   Pd(1)   Pd(2)   Ru(2)   C(13)   135.4(3) 1_555 1_555 1_555 1_555 yes
   Pd(1)   Pd(2)   Ru(2)   C(14)   156.1(4) 1_555 1_555 1_555 1_555 yes
   Pd(1)   Pd(2)   Ru(2)   C(15)   103.1(7) 1_555 1_555 1_555 1_555 yes
   Pd(1)   Pd(2)   S(2)    Ru(1)   -35.93(6) 1_555 1_555 1_555 1_555 yes
   Pd(1)   Pd(2)   S(2)    Ru(2)   36.16(6) 1_555 1_555 1_555 1_555 yes
   Pd(1)   Pd(2)   P       C(21)   -97.3(4) 1_555 1_555 1_555 1_555 yes
   Pd(1)   Pd(2)   P       C(27)   21.5(4)  1_555 1_555 1_555 1_555 yes
   Pd(1)   Pd(2)   P       C(33)   142.6(4) 1_555 1_555 1_555 1_555 yes
   Pd(1)   Ru(1)   Pd(2)   Ru(2)   -72.24(3) 1_555 1_555 1_555 1_555 yes
   Pd(1)   Ru(1)   Pd(2)   Br(1)   23.09(4) 1_555 1_555 1_555 1_555 yes
   Pd(1)   Ru(1)   Pd(2)   S(2)    -138.04(7) 1_555 1_555 1_555 1_555 yes
   Pd(1)   Ru(1)   Pd(2)   P       160.58(10) 1_555 1_555 1_555 1_555 yes
   Pd(1)   Ru(1)   Ru(2)   Pd(2)   65.08(2) 1_555 1_555 1_555 1_555 yes
   Pd(1)   Ru(1)   Ru(2)   S(1)    -57.63(8) 1_555 1_555 1_555 1_555 yes
   Pd(1)   Ru(1)   Ru(2)   S(2)    121.08(8) 1_555 1_555 1_555 1_555 yes
   Pd(1)   Ru(1)   Ru(2)   C(11)   -52.5(5) 1_555 1_555 1_555 1_555 yes
   Pd(1)   Ru(1)   Ru(2)   C(12)   41.9(7)  1_555 1_555 1_555 1_555 yes
   Pd(1)   Ru(1)   Ru(2)   C(13)   130.7(5) 1_555 1_555 1_555 1_555 yes
   Pd(1)   Ru(1)   Ru(2)   C(14)   -169.2(4) 1_555 1_555 1_555 1_555 yes
   Pd(1)   Ru(1)   Ru(2)   C(15)   -113.5(4) 1_555 1_555 1_555 1_555 yes
   Pd(1)   Ru(1)   S(1)    Ru(2)   81.17(6) 1_555 1_555 1_555 1_555 yes
   Pd(1)   Ru(1)   S(2)    Pd(2)   34.05(6) 1_555 1_555 1_555 1_555 yes
   Pd(1)   Ru(1)   S(2)    Ru(2)   -48.86(5) 1_555 1_555 1_555 1_555 yes
   Pd(1)   Ru(1)   C(1)    C(2)    76.2(10) 1_555 1_555 1_555 1_555 yes
   Pd(1)   Ru(1)   C(1)    C(5)    -41(1)   1_555 1_555 1_555 1_555 yes
   Pd(1)   Ru(1)   C(1)    C(6)    -162.8(6) 1_555 1_555 1_555 1_555 yes
   Pd(1)   Ru(1)   C(2)    C(1)    -152.5(4) 1_555 1_555 1_555 1_555 yes
   Pd(1)   Ru(1)   C(2)    C(3)    -35.3(7) 1_555 1_555 1_555 1_555 yes
   Pd(1)   Ru(1)   C(2)    C(7)    86.9(10) 1_555 1_555 1_555 1_555 yes
   Pd(1)   Ru(1)   C(3)    C(2)    154.7(5) 1_555 1_555 1_555 1_555 yes
   Pd(1)   Ru(1)   C(3)    C(4)    -87.4(5) 1_555 1_555 1_555 1_555 yes
   Pd(1)   Ru(1)   C(3)    C(8)    33(1)    1_555 1_555 1_555 1_555 yes
   Pd(1)   Ru(1)   C(4)    C(3)    98.8(5)  1_555 1_555 1_555 1_555 yes
   Pd(1)   Ru(1)   C(4)    C(5)    -143.9(5) 1_555 1_555 1_555 1_555 yes
   Pd(1)   Ru(1)   C(4)    C(9)    -22(1)   1_555 1_555 1_555 1_555 yes
   Pd(1)   Ru(1)   C(5)    C(1)    163.6(4) 1_555 1_555 1_555 1_555 yes
   Pd(1)   Ru(1)   C(5)    C(4)    46.2(6)  1_555 1_555 1_555 1_555 yes
   Pd(1)   Ru(1)   C(5)    C(10)   -73.5(10) 1_555 1_555 1_555 1_555 yes
   Pd(1)   Ru(2)   Pd(2)   Ru(1)   74.17(3) 1_555 1_555 1_555 1_555 yes
   Pd(1)   Ru(2)   Pd(2)   Br(1)   -31.04(3) 1_555 1_555 1_555 1_555 yes
   Pd(1)   Ru(2)   Pd(2)   S(2)    137.23(7) 1_555 1_555 1_555 1_555 yes
   Pd(1)   Ru(2)   Pd(2)   P       -170.1(1) 1_555 1_555 1_555 1_555 yes
   Pd(1)   Ru(2)   Ru(1)   Pd(2)   -65.08(2) 1_555 1_555 1_555 1_555 yes
   Pd(1)   Ru(2)   Ru(1)   S(1)    57.63(8) 1_555 1_555 1_555 1_555 yes
   Pd(1)   Ru(2)   Ru(1)   S(2)    -121.08(8) 1_555 1_555 1_555 1_555 yes
   Pd(1)   Ru(2)   Ru(1)   C(1)    -177.0(4) 1_555 1_555 1_555 1_555 yes
   Pd(1)   Ru(2)   Ru(1)   C(2)    124.1(4) 1_555 1_555 1_555 1_555 yes
   Pd(1)   Ru(2)   Ru(1)   C(3)    62.6(5)  1_555 1_555 1_555 1_555 yes
   Pd(1)   Ru(2)   Ru(1)   C(4)    -23.2(6) 1_555 1_555 1_555 1_555 yes
   Pd(1)   Ru(2)   Ru(1)   C(5)    -112.6(5) 1_555 1_555 1_555 1_555 yes
   Pd(1)   Ru(2)   S(1)    Ru(1)   -84.92(6) 1_555 1_555 1_555 1_555 yes
   Pd(1)   Ru(2)   S(2)    Pd(2)   -35.58(6) 1_555 1_555 1_555 1_555 yes
   Pd(1)   Ru(2)   S(2)    Ru(1)   51.13(5) 1_555 1_555 1_555 1_555 yes
   Pd(1)   Ru(2)   C(11)   C(12)   98.4(5)  1_555 1_555 1_555 1_555 yes
   Pd(1)   Ru(2)   C(11)   C(15)   -143.7(5) 1_555 1_555 1_555 1_555 yes
   Pd(1)   Ru(2)   C(11)   C(16)   -20.4(9) 1_555 1_555 1_555 1_555 yes
   Pd(1)   Ru(2)   C(12)   C(11)   -86.6(5) 1_555 1_555 1_555 1_555 yes
   Pd(1)   Ru(2)   C(12)   C(13)   156.3(5) 1_555 1_555 1_555 1_555 yes
   Pd(1)   Ru(2)   C(12)   C(17)   34.9(9)  1_555 1_555 1_555 1_555 yes
   Pd(1)   Ru(2)   C(13)   C(12)   -32.7(6) 1_555 1_555 1_555 1_555 yes
   Pd(1)   Ru(2)   C(13)   C(14)   -150.8(5) 1_555 1_555 1_555 1_555 yes
   Pd(1)   Ru(2)   C(13)   C(18)   87.0(9)  1_555 1_555 1_555 1_555 yes
   Pd(1)   Ru(2)   C(14)   C(13)   76.2(9)  1_555 1_555 1_555 1_555 yes
   Pd(1)   Ru(2)   C(14)   C(15)   -40(1)   1_555 1_555 1_555 1_555 yes
   Pd(1)   Ru(2)   C(14)   C(19)   -162.8(6) 1_555 1_555 1_555 1_555 yes
   Pd(1)   Ru(2)   C(15)   C(11)   45.4(6)  1_555 1_555 1_555 1_555 yes
   Pd(1)   Ru(2)   C(15)   C(14)   163.2(5) 1_555 1_555 1_555 1_555 yes
   Pd(1)   Ru(2)   C(15)   C(20)   -75.2(9) 1_555 1_555 1_555 1_555 yes
   Pd(1)   Br(1)   Pd(2)   Ru(1)   -24.04(4) 1_555 1_555 1_555 1_555 yes
   Pd(1)   Br(1)   Pd(2)   Ru(2)   32.02(3) 1_555 1_555 1_555 1_555 yes
   Pd(1)   Br(1)   Pd(2)   S(2)    10.6(2)  1_555 1_555 1_555 1_555 yes
   Pd(1)   Br(1)   Pd(2)   P       -173.66(7) 1_555 1_555 1_555 1_555 yes
   Pd(1)   S(1)    Ru(1)   Pd(2)   -32.65(6) 1_555 1_555 1_555 1_555 yes
   Pd(1)   S(1)    Ru(1)   Ru(2)   -81.17(6) 1_555 1_555 1_555 1_555 yes
   Pd(1)   S(1)    Ru(1)   S(2)    -80.05(9) 1_555 1_555 1_555 1_555 yes
   Pd(1)   S(1)    Ru(1)   C(1)    153.0(4) 1_555 1_555 1_555 1_555 yes
   Pd(1)   S(1)    Ru(1)   C(2)    138.0(3) 1_555 1_555 1_555 1_555 yes
   Pd(1)   S(1)    Ru(1)   C(3)    101.5(3) 1_555 1_555 1_555 1_555 yes
   Pd(1)   S(1)    Ru(1)   C(4)    72.1(3)  1_555 1_555 1_555 1_555 yes
   Pd(1)   S(1)    Ru(1)   C(5)    86.7(6)  1_555 1_555 1_555 1_555 yes
   Pd(1)   S(1)    Ru(2)   Pd(2)   34.35(6) 1_555 1_555 1_555 1_555 yes
   Pd(1)   S(1)    Ru(2)   Ru(1)   84.92(6) 1_555 1_555 1_555 1_555 yes
   Pd(1)   S(1)    Ru(2)   S(2)    83.81(9) 1_555 1_555 1_555 1_555 yes
   Pd(1)   S(1)    Ru(2)   C(11)   -92.4(3) 1_555 1_555 1_555 1_555 yes
   Pd(1)   S(1)    Ru(2)   C(12)   -68.9(3) 1_555 1_555 1_555 1_555 yes
   Pd(1)   S(1)    Ru(2)   C(13)   -106.7(7) 1_555 1_555 1_555 1_555 yes
   Pd(1)   S(1)    Ru(2)   C(14)   -151.9(3) 1_555 1_555 1_555 1_555 yes
   Pd(1)   S(1)    Ru(2)   C(15)   -130.0(3) 1_555 1_555 1_555 1_555 yes
   Pd(2)   Pd(1)   Ru(1)   Ru(2)   -74.09(3) 1_555 1_555 1_555 1_555 yes
   Pd(2)   Pd(1)   Ru(1)   S(1)    -140.02(8) 1_555 1_555 1_555 1_555 yes
   Pd(2)   Pd(1)   Ru(1)   S(2)    -29.74(6) 1_555 1_555 1_555 1_555 yes
   Pd(2)   Pd(1)   Ru(1)   C(1)    100.2(8) 1_555 1_555 1_555 1_555 yes
   Pd(2)   Pd(1)   Ru(1)   C(2)    155.9(3) 1_555 1_555 1_555 1_555 yes
   Pd(2)   Pd(1)   Ru(1)   C(3)    135.1(3) 1_555 1_555 1_555 1_555 yes
   Pd(2)   Pd(1)   Ru(1)   C(4)    96.8(3)  1_555 1_555 1_555 1_555 yes
   Pd(2)   Pd(1)   Ru(1)   C(5)    70.4(3)  1_555 1_555 1_555 1_555 yes
   Pd(2)   Pd(1)   Ru(2)   Ru(1)   75.41(2) 1_555 1_555 1_555 1_555 yes
   Pd(2)   Pd(1)   Ru(2)   S(1)    139.01(7) 1_555 1_555 1_555 1_555 yes
   Pd(2)   Pd(1)   Ru(2)   S(2)    31.04(6) 1_555 1_555 1_555 1_555 yes
   Pd(2)   Pd(1)   Ru(2)   C(11)   -128.5(2) 1_555 1_555 1_555 1_555 yes
   Pd(2)   Pd(1)   Ru(2)   C(12)   -90.5(2) 1_555 1_555 1_555 1_555 yes
   Pd(2)   Pd(1)   Ru(2)   C(13)   -71.0(3) 1_555 1_555 1_555 1_555 yes
   Pd(2)   Pd(1)   Ru(2)   C(14)   -125.4(7) 1_555 1_555 1_555 1_555 yes
   Pd(2)   Pd(1)   Ru(2)   C(15)   -154.2(3) 1_555 1_555 1_555 1_555 yes
   Pd(2)   Pd(1)   S(1)    Ru(1)   36.13(6) 1_555 1_555 1_555 1_555 yes
   Pd(2)   Pd(1)   S(1)    Ru(2)   -36.73(6) 1_555 1_555 1_555 1_555 yes
   Pd(2)   Ru(1)   Pd(1)   Ru(2)   74.09(3) 1_555 1_555 1_555 1_555 yes
   Pd(2)   Ru(1)   Pd(1)   Br(1)   -23.11(4) 1_555 1_555 1_555 1_555 yes
   Pd(2)   Ru(1)   Pd(1)   Br(2)   -158.98(5) 1_555 1_555 1_555 1_555 yes
   Pd(2)   Ru(1)   Pd(1)   S(1)    140.02(8) 1_555 1_555 1_555 1_555 yes
   Pd(2)   Ru(1)   Ru(2)   S(1)    -122.70(8) 1_555 1_555 1_555 1_555 yes
   Pd(2)   Ru(1)   Ru(2)   S(2)    56.00(7) 1_555 1_555 1_555 1_555 yes
   Pd(2)   Ru(1)   Ru(2)   C(11)   -117.5(5) 1_555 1_555 1_555 1_555 yes
   Pd(2)   Ru(1)   Ru(2)   C(12)   -23.1(7) 1_555 1_555 1_555 1_555 yes
   Pd(2)   Ru(1)   Ru(2)   C(13)   65.6(5)  1_555 1_555 1_555 1_555 yes
   Pd(2)   Ru(1)   Ru(2)   C(14)   125.7(4) 1_555 1_555 1_555 1_555 yes
   Pd(2)   Ru(1)   Ru(2)   C(15)   -178.5(4) 1_555 1_555 1_555 1_555 yes
   Pd(2)   Ru(1)   S(1)    Ru(2)   48.52(6) 1_555 1_555 1_555 1_555 yes
   Pd(2)   Ru(1)   S(2)    Ru(2)   -82.91(6) 1_555 1_555 1_555 1_555 yes
   Pd(2)   Ru(1)   C(1)    C(2)    162.6(4) 1_555 1_555 1_555 1_555 yes
   Pd(2)   Ru(1)   C(1)    C(5)    45.0(6)  1_555 1_555 1_555 1_555 yes
   Pd(2)   Ru(1)   C(1)    C(6)    -76.4(10) 1_555 1_555 1_555 1_555 yes
   Pd(2)   Ru(1)   C(2)    C(1)    -42(1)   1_555 1_555 1_555 1_555 yes
   Pd(2)   Ru(1)   C(2)    C(3)    74.5(9)  1_555 1_555 1_555 1_555 yes
   Pd(2)   Ru(1)   C(2)    C(7)    -163.3(6) 1_555 1_555 1_555 1_555 yes
   Pd(2)   Ru(1)   C(3)    C(2)    -151.4(5) 1_555 1_555 1_555 1_555 yes
   Pd(2)   Ru(1)   C(3)    C(4)    -33.5(6) 1_555 1_555 1_555 1_555 yes
   Pd(2)   Ru(1)   C(3)    C(8)    87(1)    1_555 1_555 1_555 1_555 yes
   Pd(2)   Ru(1)   C(4)    C(3)    155.9(5) 1_555 1_555 1_555 1_555 yes
   Pd(2)   Ru(1)   C(4)    C(5)    -86.8(5) 1_555 1_555 1_555 1_555 yes
   Pd(2)   Ru(1)   C(4)    C(9)    34(1)    1_555 1_555 1_555 1_555 yes
   Pd(2)   Ru(1)   C(5)    C(1)    -144.2(5) 1_555 1_555 1_555 1_555 yes
   Pd(2)   Ru(1)   C(5)    C(4)    98.4(5)  1_555 1_555 1_555 1_555 yes
   Pd(2)   Ru(1)   C(5)    C(10)   -21.3(9) 1_555 1_555 1_555 1_555 yes
   Pd(2)   Ru(2)   Pd(1)   Ru(1)   -75.41(2) 1_555 1_555 1_555 1_555 yes
   Pd(2)   Ru(2)   Pd(1)   Br(1)   30.99(3) 1_555 1_555 1_555 1_555 yes
   Pd(2)   Ru(2)   Pd(1)   Br(2)   170.22(6) 1_555 1_555 1_555 1_555 yes
   Pd(2)   Ru(2)   Pd(1)   S(1)    -139.01(7) 1_555 1_555 1_555 1_555 yes
   Pd(2)   Ru(2)   Ru(1)   S(1)    122.70(8) 1_555 1_555 1_555 1_555 yes
   Pd(2)   Ru(2)   Ru(1)   S(2)    -56.00(7) 1_555 1_555 1_555 1_555 yes
   Pd(2)   Ru(2)   Ru(1)   C(1)    -111.9(4) 1_555 1_555 1_555 1_555 yes
   Pd(2)   Ru(2)   Ru(1)   C(2)    -170.9(4) 1_555 1_555 1_555 1_555 yes
   Pd(2)   Ru(2)   Ru(1)   C(3)    127.7(5) 1_555 1_555 1_555 1_555 yes
   Pd(2)   Ru(2)   Ru(1)   C(4)    41.9(6)  1_555 1_555 1_555 1_555 yes
   Pd(2)   Ru(2)   Ru(1)   C(5)    -47.6(5) 1_555 1_555 1_555 1_555 yes
   Pd(2)   Ru(2)   S(1)    Ru(1)   -50.57(6) 1_555 1_555 1_555 1_555 yes
   Pd(2)   Ru(2)   S(2)    Ru(1)   86.71(7) 1_555 1_555 1_555 1_555 yes
   Pd(2)   Ru(2)   C(11)   C(12)   44.0(6)  1_555 1_555 1_555 1_555 yes
   Pd(2)   Ru(2)   C(11)   C(15)   161.8(4) 1_555 1_555 1_555 1_555 yes
   Pd(2)   Ru(2)   C(11)   C(16)   -74.8(9) 1_555 1_555 1_555 1_555 yes
   Pd(2)   Ru(2)   C(12)   C(11)   -145.2(5) 1_555 1_555 1_555 1_555 yes
   Pd(2)   Ru(2)   C(12)   C(13)   97.7(5)  1_555 1_555 1_555 1_555 yes
   Pd(2)   Ru(2)   C(12)   C(17)   -23.8(8) 1_555 1_555 1_555 1_555 yes
   Pd(2)   Ru(2)   C(13)   C(12)   -87.2(5) 1_555 1_555 1_555 1_555 yes
   Pd(2)   Ru(2)   C(13)   C(14)   154.8(5) 1_555 1_555 1_555 1_555 yes
   Pd(2)   Ru(2)   C(13)   C(18)   32.6(9)  1_555 1_555 1_555 1_555 yes
   Pd(2)   Ru(2)   C(14)   C(13)   -34.6(7) 1_555 1_555 1_555 1_555 yes
   Pd(2)   Ru(2)   C(14)   C(15)   -151.3(4) 1_555 1_555 1_555 1_555 yes
   Pd(2)   Ru(2)   C(14)   C(19)   86.4(9)  1_555 1_555 1_555 1_555 yes
   Pd(2)   Ru(2)   C(15)   C(11)   -43(1)   1_555 1_555 1_555 1_555 yes
   Pd(2)   Ru(2)   C(15)   C(14)   74.3(9)  1_555 1_555 1_555 1_555 yes
   Pd(2)   Ru(2)   C(15)   C(20)   -164.1(6) 1_555 1_555 1_555 1_555 yes
   Pd(2)   Br(1)   Pd(1)   Ru(1)   25.14(4) 1_555 1_555 1_555 1_555 yes
   Pd(2)   Br(1)   Pd(1)   Ru(2)   -33.63(3) 1_555 1_555 1_555 1_555 yes
   Pd(2)   Br(1)   Pd(1)   Br(2)   172.63(4) 1_555 1_555 1_555 1_555 yes
   Pd(2)   Br(1)   Pd(1)   S(1)    -12.0(2) 1_555 1_555 1_555 1_555 yes
   Pd(2)   S(2)    Ru(1)   Ru(2)   82.91(6) 1_555 1_555 1_555 1_555 yes
   Pd(2)   S(2)    Ru(1)   S(1)    81.80(9) 1_555 1_555 1_555 1_555 yes
   Pd(2)   S(2)    Ru(1)   C(1)    -130.4(3) 1_555 1_555 1_555 1_555 yes
   Pd(2)   S(2)    Ru(1)   C(2)    -151.4(3) 1_555 1_555 1_555 1_555 yes
   Pd(2)   S(2)    Ru(1)   C(3)    -102.4(7) 1_555 1_555 1_555 1_555 yes
   Pd(2)   S(2)    Ru(1)   C(4)    -68.2(3) 1_555 1_555 1_555 1_555 yes
   Pd(2)   S(2)    Ru(1)   C(5)    -92.8(3) 1_555 1_555 1_555 1_555 yes
   Pd(2)   S(2)    Ru(2)   Ru(1)   -86.71(7) 1_555 1_555 1_555 1_555 yes
   Pd(2)   S(2)    Ru(2)   S(1)    -85.60(9) 1_555 1_555 1_555 1_555 yes
   Pd(2)   S(2)    Ru(2)   C(11)   85.2(7)  1_555 1_555 1_555 1_555 yes
   Pd(2)   S(2)    Ru(2)   C(12)   69.4(3)  1_555 1_555 1_555 1_555 yes
   Pd(2)   S(2)    Ru(2)   C(13)   98.4(3)  1_555 1_555 1_555 1_555 yes
   Pd(2)   S(2)    Ru(2)   C(14)   135.7(3) 1_555 1_555 1_555 1_555 yes
   Pd(2)   S(2)    Ru(2)   C(15)   151.0(4) 1_555 1_555 1_555 1_555 yes
   Pd(2)   P       C(21)   C(22)   50.1(9)  1_555 1_555 1_555 1_555 yes
   Pd(2)   P       C(21)   C(26)   -129.4(8) 1_555 1_555 1_555 1_555 yes
   Pd(2)   P       C(27)   C(28)   20.9(8)  1_555 1_555 1_555 1_555 yes
   Pd(2)   P       C(27)   C(32)   -164.2(7) 1_555 1_555 1_555 1_555 yes
   Pd(2)   P       C(33)   C(34)   61.1(8)  1_555 1_555 1_555 1_555 yes
   Pd(2)   P       C(33)   C(38)   -113.7(7) 1_555 1_555 1_555 1_555 yes
   Ru(1)   Pd(1)   Pd(2)   Ru(2)   61.80(2) 1_555 1_555 1_555 1_555 yes
   Ru(1)   Pd(1)   Pd(2)   Br(1)   -154.28(4) 1_555 1_555 1_555 1_555 yes
   Ru(1)   Pd(1)   Pd(2)   S(2)    30.24(6) 1_555 1_555 1_555 1_555 yes
   Ru(1)   Pd(1)   Pd(2)   P       -136.5(2) 1_555 1_555 1_555 1_555 yes
   Ru(1)   Pd(1)   Ru(2)   S(1)    63.60(7) 1_555 1_555 1_555 1_555 yes
   Ru(1)   Pd(1)   Ru(2)   S(2)    -44.37(6) 1_555 1_555 1_555 1_555 yes
   Ru(1)   Pd(1)   Ru(2)   C(11)   156.1(2) 1_555 1_555 1_555 1_555 yes
   Ru(1)   Pd(1)   Ru(2)   C(12)   -165.9(2) 1_555 1_555 1_555 1_555 yes
   Ru(1)   Pd(1)   Ru(2)   C(13)   -146.4(3) 1_555 1_555 1_555 1_555 yes
   Ru(1)   Pd(1)   Ru(2)   C(14)   159.2(7) 1_555 1_555 1_555 1_555 yes
   Ru(1)   Pd(1)   Ru(2)   C(15)   130.4(3) 1_555 1_555 1_555 1_555 yes
   Ru(1)   Pd(1)   S(1)    Ru(2)   -72.86(6) 1_555 1_555 1_555 1_555 yes
   Ru(1)   Pd(2)   Pd(1)   Ru(2)   -61.80(2) 1_555 1_555 1_555 1_555 yes
   Ru(1)   Pd(2)   Pd(1)   Br(1)   154.28(4) 1_555 1_555 1_555 1_555 yes
   Ru(1)   Pd(2)   Pd(1)   Br(2)   135.2(1) 1_555 1_555 1_555 1_555 yes
   Ru(1)   Pd(2)   Pd(1)   S(1)    -30.22(6) 1_555 1_555 1_555 1_555 yes
   Ru(1)   Pd(2)   Ru(2)   S(1)    43.67(6) 1_555 1_555 1_555 1_555 yes
   Ru(1)   Pd(2)   Ru(2)   S(2)    -63.06(7) 1_555 1_555 1_555 1_555 yes
   Ru(1)   Pd(2)   Ru(2)   C(11)   146.5(3) 1_555 1_555 1_555 1_555 yes
   Ru(1)   Pd(2)   Ru(2)   C(12)   171.8(3) 1_555 1_555 1_555 1_555 yes
   Ru(1)   Pd(2)   Ru(2)   C(13)   -150.4(3) 1_555 1_555 1_555 1_555 yes
   Ru(1)   Pd(2)   Ru(2)   C(14)   -129.8(4) 1_555 1_555 1_555 1_555 yes
   Ru(1)   Pd(2)   Ru(2)   C(15)   177.3(7) 1_555 1_555 1_555 1_555 yes
   Ru(1)   Pd(2)   S(2)    Ru(2)   72.09(5) 1_555 1_555 1_555 1_555 yes
   Ru(1)   Pd(2)   P       C(21)   138.0(3) 1_555 1_555 1_555 1_555 yes
   Ru(1)   Pd(2)   P       C(27)   -103.3(3) 1_555 1_555 1_555 1_555 yes
   Ru(1)   Pd(2)   P       C(33)   17.9(4)  1_555 1_555 1_555 1_555 yes
   Ru(1)   Ru(2)   Pd(1)   Br(1)   106.40(4) 1_555 1_555 1_555 1_555 yes
   Ru(1)   Ru(2)   Pd(1)   Br(2)   -114.37(6) 1_555 1_555 1_555 1_555 yes
   Ru(1)   Ru(2)   Pd(1)   S(1)    -63.60(7) 1_555 1_555 1_555 1_555 yes
   Ru(1)   Ru(2)   Pd(2)   Br(1)   -105.21(4) 1_555 1_555 1_555 1_555 yes
   Ru(1)   Ru(2)   Pd(2)   S(2)    63.06(7) 1_555 1_555 1_555 1_555 yes
   Ru(1)   Ru(2)   Pd(2)   P       115.7(1) 1_555 1_555 1_555 1_555 yes
   Ru(1)   Ru(2)   C(11)   C(12)   144.3(5) 1_555 1_555 1_555 1_555 yes
   Ru(1)   Ru(2)   C(11)   C(15)   -97.8(7) 1_555 1_555 1_555 1_555 yes
   Ru(1)   Ru(2)   C(11)   C(16)   25(1)    1_555 1_555 1_555 1_555 yes
   Ru(1)   Ru(2)   C(12)   C(11)   -124.2(6) 1_555 1_555 1_555 1_555 yes
   Ru(1)   Ru(2)   C(12)   C(13)   118.7(7) 1_555 1_555 1_555 1_555 yes
   Ru(1)   Ru(2)   C(12)   C(17)   -2(1)    1_555 1_555 1_555 1_555 yes
   Ru(1)   Ru(2)   C(13)   C(12)   -143.9(5) 1_555 1_555 1_555 1_555 yes
   Ru(1)   Ru(2)   C(13)   C(14)   98.0(6)  1_555 1_555 1_555 1_555 yes
   Ru(1)   Ru(2)   C(13)   C(18)   -24(1)   1_555 1_555 1_555 1_555 yes
   Ru(1)   Ru(2)   C(14)   C(13)   -131.0(5) 1_555 1_555 1_555 1_555 yes
   Ru(1)   Ru(2)   C(14)   C(15)   112.4(5) 1_555 1_555 1_555 1_555 yes
   Ru(1)   Ru(2)   C(14)   C(19)   -9(1)    1_555 1_555 1_555 1_555 yes
   Ru(1)   Ru(2)   C(15)   C(11)   132.8(5) 1_555 1_555 1_555 1_555 yes
   Ru(1)   Ru(2)   C(15)   C(14)   -109.3(5) 1_555 1_555 1_555 1_555 yes
   Ru(1)   Ru(2)   C(15)   C(20)   12(1)    1_555 1_555 1_555 1_555 yes
   Ru(1)   S(1)    Pd(1)   Ru(2)   72.86(6) 1_555 1_555 1_555 1_555 yes
   Ru(1)   S(1)    Pd(1)   Br(1)   46.3(2)  1_555 1_555 1_555 1_555 yes
   Ru(1)   S(1)    Pd(1)   Br(2)   -138.29(5) 1_555 1_555 1_555 1_555 yes
   Ru(1)   S(1)    Ru(2)   S(2)    -1.11(9) 1_555 1_555 1_555 1_555 yes
   Ru(1)   S(1)    Ru(2)   C(11)   -177.4(3) 1_555 1_555 1_555 1_555 yes
   Ru(1)   S(1)    Ru(2)   C(12)   -153.9(3) 1_555 1_555 1_555 1_555 yes
   Ru(1)   S(1)    Ru(2)   C(13)   168.4(7) 1_555 1_555 1_555 1_555 yes
   Ru(1)   S(1)    Ru(2)   C(14)   123.2(3) 1_555 1_555 1_555 1_555 yes
   Ru(1)   S(1)    Ru(2)   C(15)   145.1(3) 1_555 1_555 1_555 1_555 yes
   Ru(1)   S(2)    Pd(2)   Ru(2)   -72.09(5) 1_555 1_555 1_555 1_555 yes
   Ru(1)   S(2)    Pd(2)   Br(1)   -44.9(2) 1_555 1_555 1_555 1_555 yes
   Ru(1)   S(2)    Pd(2)   P       139.35(8) 1_555 1_555 1_555 1_555 yes
   Ru(1)   S(2)    Ru(2)   S(1)    1.11(9)  1_555 1_555 1_555 1_555 yes
   Ru(1)   S(2)    Ru(2)   C(11)   171.9(7) 1_555 1_555 1_555 1_555 yes
   Ru(1)   S(2)    Ru(2)   C(12)   156.1(3) 1_555 1_555 1_555 1_555 yes
   Ru(1)   S(2)    Ru(2)   C(13)   -174.9(3) 1_555 1_555 1_555 1_555 yes
   Ru(1)   S(2)    Ru(2)   C(14)   -137.6(3) 1_555 1_555 1_555 1_555 yes
   Ru(1)   S(2)    Ru(2)   C(15)   -122.3(4) 1_555 1_555 1_555 1_555 yes
   Ru(1)   C(1)    C(2)    C(3)    -63.7(7) 1_555 1_555 1_555 1_555 yes
   Ru(1)   C(1)    C(2)    C(7)    121.5(10) 1_555 1_555 1_555 1_555 yes
   Ru(1)   C(1)    C(5)    C(4)    62.1(6)  1_555 1_555 1_555 1_555 yes
   Ru(1)   C(1)    C(5)    C(10)   -120.1(9) 1_555 1_555 1_555 1_555 yes
   Ru(1)   C(2)    C(1)    C(5)    63.1(6)  1_555 1_555 1_555 1_555 yes
   Ru(1)   C(2)    C(1)    C(6)    -120.5(10) 1_555 1_555 1_555 1_555 yes
   Ru(1)   C(2)    C(3)    C(4)    -61.2(6) 1_555 1_555 1_555 1_555 yes
   Ru(1)   C(2)    C(3)    C(8)    122.5(9) 1_555 1_555 1_555 1_555 yes
   Ru(1)   C(3)    C(2)    C(1)    62.2(6)  1_555 1_555 1_555 1_555 yes
   Ru(1)   C(3)    C(2)    C(7)    -122(1)  1_555 1_555 1_555 1_555 yes
   Ru(1)   C(3)    C(4)    C(5)    -61.6(6) 1_555 1_555 1_555 1_555 yes
   Ru(1)   C(3)    C(4)    C(9)    120(1)   1_555 1_555 1_555 1_555 yes
   Ru(1)   C(4)    C(3)    C(2)    60.5(6)  1_555 1_555 1_555 1_555 yes
   Ru(1)   C(4)    C(3)    C(8)    -123.1(8) 1_555 1_555 1_555 1_555 yes
   Ru(1)   C(4)    C(5)    C(1)    -61.1(6) 1_555 1_555 1_555 1_555 yes
   Ru(1)   C(4)    C(5)    C(10)   121.0(9) 1_555 1_555 1_555 1_555 yes
   Ru(1)   C(5)    C(1)    C(2)    -62.2(6) 1_555 1_555 1_555 1_555 yes
   Ru(1)   C(5)    C(1)    C(6)    121.4(10) 1_555 1_555 1_555 1_555 yes
   Ru(1)   C(5)    C(4)    C(3)    61.9(6)  1_555 1_555 1_555 1_555 yes
   Ru(1)   C(5)    C(4)    C(9)    -120(1)  1_555 1_555 1_555 1_555 yes
   Ru(2)   Pd(1)   Pd(2)   Br(1)   143.92(4) 1_555 1_555 1_555 1_555 yes
   Ru(2)   Pd(1)   Pd(2)   S(2)    -31.56(6) 1_555 1_555 1_555 1_555 yes
   Ru(2)   Pd(1)   Pd(2)   P       161.7(2) 1_555 1_555 1_555 1_555 yes
   Ru(2)   Pd(1)   Ru(1)   S(1)    -65.94(8) 1_555 1_555 1_555 1_555 yes
   Ru(2)   Pd(1)   Ru(1)   S(2)    44.35(6) 1_555 1_555 1_555 1_555 yes
   Ru(2)   Pd(1)   Ru(1)   C(1)    174.3(8) 1_555 1_555 1_555 1_555 yes
   Ru(2)   Pd(1)   Ru(1)   C(2)    -130.0(3) 1_555 1_555 1_555 1_555 yes
   Ru(2)   Pd(1)   Ru(1)   C(3)    -150.8(3) 1_555 1_555 1_555 1_555 yes
   Ru(2)   Pd(1)   Ru(1)   C(4)    170.9(3) 1_555 1_555 1_555 1_555 yes
   Ru(2)   Pd(1)   Ru(1)   C(5)    144.5(3) 1_555 1_555 1_555 1_555 yes
   Ru(2)   Pd(2)   Pd(1)   Br(1)   -143.92(4) 1_555 1_555 1_555 1_555 yes
   Ru(2)   Pd(2)   Pd(1)   Br(2)   -163.0(1) 1_555 1_555 1_555 1_555 yes
   Ru(2)   Pd(2)   Pd(1)   S(1)    31.58(6) 1_555 1_555 1_555 1_555 yes
   Ru(2)   Pd(2)   Ru(1)   S(1)    -43.28(6) 1_555 1_555 1_555 1_555 yes
   Ru(2)   Pd(2)   Ru(1)   S(2)    65.80(7) 1_555 1_555 1_555 1_555 yes
   Ru(2)   Pd(2)   Ru(1)   C(1)    132.2(3) 1_555 1_555 1_555 1_555 yes
   Ru(2)   Pd(2)   Ru(1)   C(2)    162.8(7) 1_555 1_555 1_555 1_555 yes
   Ru(2)   Pd(2)   Ru(1)   C(3)    -144.2(3) 1_555 1_555 1_555 1_555 yes
   Ru(2)   Pd(2)   Ru(1)   C(4)    -164.3(3) 1_555 1_555 1_555 1_555 yes
   Ru(2)   Pd(2)   Ru(1)   C(5)    157.8(2) 1_555 1_555 1_555 1_555 yes
   Ru(2)   Pd(2)   P       C(21)   57.9(4)  1_555 1_555 1_555 1_555 yes
   Ru(2)   Pd(2)   P       C(27)   176.7(3) 1_555 1_555 1_555 1_555 yes
   Ru(2)   Pd(2)   P       C(33)   -62.2(4) 1_555 1_555 1_555 1_555 yes
   Ru(2)   Ru(1)   Pd(1)   Br(1)   -97.20(4) 1_555 1_555 1_555 1_555 yes
   Ru(2)   Ru(1)   Pd(1)   Br(2)   126.93(5) 1_555 1_555 1_555 1_555 yes
   Ru(2)   Ru(1)   Pd(1)   S(1)    65.94(8) 1_555 1_555 1_555 1_555 yes
   Ru(2)   Ru(1)   Pd(2)   Br(1)   95.33(4) 1_555 1_555 1_555 1_555 yes
   Ru(2)   Ru(1)   Pd(2)   S(2)    -65.80(7) 1_555 1_555 1_555 1_555 yes
   Ru(2)   Ru(1)   Pd(2)   P       -127.18(10) 1_555 1_555 1_555 1_555 yes
   Ru(2)   Ru(1)   C(1)    C(2)    -111.4(5) 1_555 1_555 1_555 1_555 yes
   Ru(2)   Ru(1)   C(1)    C(5)    131.0(5) 1_555 1_555 1_555 1_555 yes
   Ru(2)   Ru(1)   C(1)    C(6)    9(1)     1_555 1_555 1_555 1_555 yes
   Ru(2)   Ru(1)   C(2)    C(1)    114.4(5) 1_555 1_555 1_555 1_555 yes
   Ru(2)   Ru(1)   C(2)    C(3)    -128.4(5) 1_555 1_555 1_555 1_555 yes
   Ru(2)   Ru(1)   C(2)    C(7)    -6(1)    1_555 1_555 1_555 1_555 yes
   Ru(2)   Ru(1)   C(3)    C(2)    102.3(6) 1_555 1_555 1_555 1_555 yes
   Ru(2)   Ru(1)   C(3)    C(4)    -139.8(5) 1_555 1_555 1_555 1_555 yes
   Ru(2)   Ru(1)   C(3)    C(8)    -19(1)   1_555 1_555 1_555 1_555 yes
   Ru(2)   Ru(1)   C(4)    C(3)    119.1(6) 1_555 1_555 1_555 1_555 yes
   Ru(2)   Ru(1)   C(4)    C(5)    -123.6(6) 1_555 1_555 1_555 1_555 yes
   Ru(2)   Ru(1)   C(4)    C(9)    -1(1)    1_555 1_555 1_555 1_555 yes
   Ru(2)   Ru(1)   C(5)    C(1)    -103.2(6) 1_555 1_555 1_555 1_555 yes
   Ru(2)   Ru(1)   C(5)    C(4)    139.4(5) 1_555 1_555 1_555 1_555 yes
   Ru(2)   Ru(1)   C(5)    C(10)   19(1)    1_555 1_555 1_555 1_555 yes
   Ru(2)   S(1)    Pd(1)   Br(1)   -26.6(2) 1_555 1_555 1_555 1_555 yes
   Ru(2)   S(1)    Pd(1)   Br(2)   148.85(5) 1_555 1_555 1_555 1_555 yes
   Ru(2)   S(1)    Ru(1)   S(2)    1.11(10) 1_555 1_555 1_555 1_555 yes
   Ru(2)   S(1)    Ru(1)   C(1)    -125.8(4) 1_555 1_555 1_555 1_555 yes
   Ru(2)   S(1)    Ru(1)   C(2)    -140.9(3) 1_555 1_555 1_555 1_555 yes
   Ru(2)   S(1)    Ru(1)   C(3)    -177.3(3) 1_555 1_555 1_555 1_555 yes
   Ru(2)   S(1)    Ru(1)   C(4)    153.2(3) 1_555 1_555 1_555 1_555 yes
   Ru(2)   S(1)    Ru(1)   C(5)    167.9(6) 1_555 1_555 1_555 1_555 yes
   Ru(2)   S(2)    Pd(2)   Br(1)   27.2(2)  1_555 1_555 1_555 1_555 yes
   Ru(2)   S(2)    Pd(2)   P       -148.56(7) 1_555 1_555 1_555 1_555 yes
   Ru(2)   S(2)    Ru(1)   S(1)    -1.11(9) 1_555 1_555 1_555 1_555 yes
   Ru(2)   S(2)    Ru(1)   C(1)    146.6(3) 1_555 1_555 1_555 1_555 yes
   Ru(2)   S(2)    Ru(1)   C(2)    125.7(3) 1_555 1_555 1_555 1_555 yes
   Ru(2)   S(2)    Ru(1)   C(3)    174.7(7) 1_555 1_555 1_555 1_555 yes
   Ru(2)   S(2)    Ru(1)   C(4)    -151.1(3) 1_555 1_555 1_555 1_555 yes
   Ru(2)   S(2)    Ru(1)   C(5)    -175.7(3) 1_555 1_555 1_555 1_555 yes
   Ru(2)   C(11)   C(12)   C(13)   61.5(6)  1_555 1_555 1_555 1_555 yes
   Ru(2)   C(11)   C(12)   C(17)   -122.0(9) 1_555 1_555 1_555 1_555 yes
   Ru(2)   C(11)   C(15)   C(14)   -61.6(6) 1_555 1_555 1_555 1_555 yes
   Ru(2)   C(11)   C(15)   C(20)   121.5(9) 1_555 1_555 1_555 1_555 yes
   Ru(2)   C(12)   C(11)   C(15)   -62.0(6) 1_555 1_555 1_555 1_555 yes
   Ru(2)   C(12)   C(11)   C(16)   121.8(8) 1_555 1_555 1_555 1_555 yes
   Ru(2)   C(12)   C(13)   C(14)   60.7(6)  1_555 1_555 1_555 1_555 yes
   Ru(2)   C(12)   C(13)   C(18)   -122.1(8) 1_555 1_555 1_555 1_555 yes
   Ru(2)   C(13)   C(12)   C(11)   -61.0(6) 1_555 1_555 1_555 1_555 yes
   Ru(2)   C(13)   C(12)   C(17)   122.6(9) 1_555 1_555 1_555 1_555 yes
   Ru(2)   C(13)   C(14)   C(15)   62.7(6)  1_555 1_555 1_555 1_555 yes
   Ru(2)   C(13)   C(14)   C(19)   -122.7(9) 1_555 1_555 1_555 1_555 yes
   Ru(2)   C(14)   C(13)   C(12)   -61.8(6) 1_555 1_555 1_555 1_555 yes
   Ru(2)   C(14)   C(13)   C(18)   121.1(9) 1_555 1_555 1_555 1_555 yes
   Ru(2)   C(14)   C(15)   C(11)   62.1(6)  1_555 1_555 1_555 1_555 yes
   Ru(2)   C(14)   C(15)   C(20)   -121.1(9) 1_555 1_555 1_555 1_555 yes
   Ru(2)   C(15)   C(11)   C(12)   62.7(6)  1_555 1_555 1_555 1_555 yes
   Ru(2)   C(15)   C(11)   C(16)   -121.4(9) 1_555 1_555 1_555 1_555 yes
   Ru(2)   C(15)   C(14)   C(13)   -63.3(6) 1_555 1_555 1_555 1_555 yes
   Ru(2)   C(15)   C(14)   C(19)   122.2(9) 1_555 1_555 1_555 1_555 yes
   Br(1)   Pd(1)   Pd(2)   S(2)    -175.48(7) 1_555 1_555 1_555 1_555 yes
   Br(1)   Pd(1)   Pd(2)   P       17.8(2)  1_555 1_555 1_555 1_555 yes
   Br(1)   Pd(1)   Ru(1)   S(1)    -163.13(8) 1_555 1_555 1_555 1_555 yes
   Br(1)   Pd(1)   Ru(1)   S(2)    -52.84(7) 1_555 1_555 1_555 1_555 yes
   Br(1)   Pd(1)   Ru(1)   C(1)    77.1(8)  1_555 1_555 1_555 1_555 yes
   Br(1)   Pd(1)   Ru(1)   C(2)    132.8(3) 1_555 1_555 1_555 1_555 yes
   Br(1)   Pd(1)   Ru(1)   C(3)    112.0(3) 1_555 1_555 1_555 1_555 yes
   Br(1)   Pd(1)   Ru(1)   C(4)    73.7(3)  1_555 1_555 1_555 1_555 yes
   Br(1)   Pd(1)   Ru(1)   C(5)    47.3(3)  1_555 1_555 1_555 1_555 yes
   Br(1)   Pd(1)   Ru(2)   S(1)    170.00(8) 1_555 1_555 1_555 1_555 yes
   Br(1)   Pd(1)   Ru(2)   S(2)    62.03(7) 1_555 1_555 1_555 1_555 yes
   Br(1)   Pd(1)   Ru(2)   C(11)   -97.5(2) 1_555 1_555 1_555 1_555 yes
   Br(1)   Pd(1)   Ru(2)   C(12)   -59.5(2) 1_555 1_555 1_555 1_555 yes
   Br(1)   Pd(1)   Ru(2)   C(13)   -40.0(3) 1_555 1_555 1_555 1_555 yes
   Br(1)   Pd(1)   Ru(2)   C(14)   -94.4(7) 1_555 1_555 1_555 1_555 yes
   Br(1)   Pd(1)   Ru(2)   C(15)   -123.2(3) 1_555 1_555 1_555 1_555 yes
   Br(1)   Pd(2)   Pd(1)   Br(2)   -19.0(1) 1_555 1_555 1_555 1_555 yes
   Br(1)   Pd(2)   Pd(1)   S(1)    175.51(7) 1_555 1_555 1_555 1_555 yes
   Br(1)   Pd(2)   Ru(1)   S(1)    52.05(7) 1_555 1_555 1_555 1_555 yes
   Br(1)   Pd(2)   Ru(1)   S(2)    161.13(8) 1_555 1_555 1_555 1_555 yes
   Br(1)   Pd(2)   Ru(1)   C(1)    -132.5(3) 1_555 1_555 1_555 1_555 yes
   Br(1)   Pd(2)   Ru(1)   C(2)    -101.8(7) 1_555 1_555 1_555 1_555 yes
   Br(1)   Pd(2)   Ru(1)   C(3)    -48.9(3) 1_555 1_555 1_555 1_555 yes
   Br(1)   Pd(2)   Ru(1)   C(4)    -69.0(3) 1_555 1_555 1_555 1_555 yes
   Br(1)   Pd(2)   Ru(1)   C(5)    -106.9(2) 1_555 1_555 1_555 1_555 yes
   Br(1)   Pd(2)   Ru(2)   S(1)    -61.54(7) 1_555 1_555 1_555 1_555 yes
   Br(1)   Pd(2)   Ru(2)   S(2)    -168.27(8) 1_555 1_555 1_555 1_555 yes
   Br(1)   Pd(2)   Ru(2)   C(11)   41.3(3)  1_555 1_555 1_555 1_555 yes
   Br(1)   Pd(2)   Ru(2)   C(12)   66.6(3)  1_555 1_555 1_555 1_555 yes
   Br(1)   Pd(2)   Ru(2)   C(13)   104.3(3) 1_555 1_555 1_555 1_555 yes
   Br(1)   Pd(2)   Ru(2)   C(14)   125.0(4) 1_555 1_555 1_555 1_555 yes
   Br(1)   Pd(2)   Ru(2)   C(15)   72.1(7)  1_555 1_555 1_555 1_555 yes
   Br(1)   Pd(2)   P       C(21)   -82.0(4) 1_555 1_555 1_555 1_555 yes
   Br(1)   Pd(2)   P       C(27)   36.7(3)  1_555 1_555 1_555 1_555 yes
   Br(1)   Pd(2)   P       C(33)   157.8(3) 1_555 1_555 1_555 1_555 yes
   Br(2)   Pd(1)   Pd(2)   S(2)    165.5(1) 1_555 1_555 1_555 1_555 yes
   Br(2)   Pd(1)   Pd(2)   P       -1.3(2)  1_555 1_555 1_555 1_555 yes
   Br(2)   Pd(1)   Ru(1)   S(1)    60.99(9) 1_555 1_555 1_555 1_555 yes
   Br(2)   Pd(1)   Ru(1)   S(2)    171.28(7) 1_555 1_555 1_555 1_555 yes
   Br(2)   Pd(1)   Ru(1)   C(1)    -58.8(8) 1_555 1_555 1_555 1_555 yes
   Br(2)   Pd(1)   Ru(1)   C(2)    -3.1(3)  1_555 1_555 1_555 1_555 yes
   Br(2)   Pd(1)   Ru(1)   C(3)    -23.9(3) 1_555 1_555 1_555 1_555 yes
   Br(2)   Pd(1)   Ru(1)   C(4)    -62.2(3) 1_555 1_555 1_555 1_555 yes
   Br(2)   Pd(1)   Ru(1)   C(5)    -88.6(3) 1_555 1_555 1_555 1_555 yes
   Br(2)   Pd(1)   Ru(2)   S(1)    -50.77(9) 1_555 1_555 1_555 1_555 yes
   Br(2)   Pd(1)   Ru(2)   S(2)    -158.75(7) 1_555 1_555 1_555 1_555 yes
   Br(2)   Pd(1)   Ru(2)   C(11)   41.7(3)  1_555 1_555 1_555 1_555 yes
   Br(2)   Pd(1)   Ru(2)   C(12)   79.7(2)  1_555 1_555 1_555 1_555 yes
   Br(2)   Pd(1)   Ru(2)   C(13)   99.2(3)  1_555 1_555 1_555 1_555 yes
   Br(2)   Pd(1)   Ru(2)   C(14)   44.8(7)  1_555 1_555 1_555 1_555 yes
   Br(2)   Pd(1)   Ru(2)   C(15)   16.0(3)  1_555 1_555 1_555 1_555 yes
   S(1)    Pd(1)   Pd(2)   S(2)    0.02(8)  1_555 1_555 1_555 1_555 yes
   S(1)    Pd(1)   Pd(2)   P       -166.7(2) 1_555 1_555 1_555 1_555 yes
   S(1)    Pd(1)   Ru(1)   S(2)    110.29(10) 1_555 1_555 1_555 1_555 yes
   S(1)    Pd(1)   Ru(1)   C(1)    -119.8(8) 1_555 1_555 1_555 1_555 yes
   S(1)    Pd(1)   Ru(1)   C(2)    -64.1(3) 1_555 1_555 1_555 1_555 yes
   S(1)    Pd(1)   Ru(1)   C(3)    -84.9(3) 1_555 1_555 1_555 1_555 yes
   S(1)    Pd(1)   Ru(1)   C(4)    -123.1(3) 1_555 1_555 1_555 1_555 yes
   S(1)    Pd(1)   Ru(1)   C(5)    -149.6(3) 1_555 1_555 1_555 1_555 yes
   S(1)    Pd(1)   Ru(2)   S(2)    -107.97(9) 1_555 1_555 1_555 1_555 yes
   S(1)    Pd(1)   Ru(2)   C(11)   92.5(3)  1_555 1_555 1_555 1_555 yes
   S(1)    Pd(1)   Ru(2)   C(12)   130.5(2) 1_555 1_555 1_555 1_555 yes
   S(1)    Pd(1)   Ru(2)   C(13)   150.0(3) 1_555 1_555 1_555 1_555 yes
   S(1)    Pd(1)   Ru(2)   C(14)   95.6(7)  1_555 1_555 1_555 1_555 yes
   S(1)    Pd(1)   Ru(2)   C(15)   66.8(3)  1_555 1_555 1_555 1_555 yes
   S(1)    Ru(1)   Pd(2)   S(2)    -109.08(10) 1_555 1_555 1_555 1_555 yes
   S(1)    Ru(1)   Pd(2)   P       -170.5(1) 1_555 1_555 1_555 1_555 yes
   S(1)    Ru(1)   Ru(2)   S(2)    178.7(1) 1_555 1_555 1_555 1_555 yes
   S(1)    Ru(1)   Ru(2)   C(11)   5.2(5)   1_555 1_555 1_555 1_555 yes
   S(1)    Ru(1)   Ru(2)   C(12)   99.6(7)  1_555 1_555 1_555 1_555 yes
   S(1)    Ru(1)   Ru(2)   C(13)   -171.7(5) 1_555 1_555 1_555 1_555 yes
   S(1)    Ru(1)   Ru(2)   C(14)   -111.6(4) 1_555 1_555 1_555 1_555 yes
   S(1)    Ru(1)   Ru(2)   C(15)   -55.8(4) 1_555 1_555 1_555 1_555 yes
   S(1)    Ru(1)   C(1)    C(2)    -24.3(7) 1_555 1_555 1_555 1_555 yes
   S(1)    Ru(1)   C(1)    C(5)    -141.8(5) 1_555 1_555 1_555 1_555 yes
   S(1)    Ru(1)   C(1)    C(6)    96.7(9)  1_555 1_555 1_555 1_555 yes
   S(1)    Ru(1)   C(2)    C(1)    163.8(5) 1_555 1_555 1_555 1_555 yes
   S(1)    Ru(1)   C(2)    C(3)    -78.9(5) 1_555 1_555 1_555 1_555 yes
   S(1)    Ru(1)   C(2)    C(7)    43.3(9)  1_555 1_555 1_555 1_555 yes
   S(1)    Ru(1)   C(3)    C(2)    106.3(5) 1_555 1_555 1_555 1_555 yes
   S(1)    Ru(1)   C(3)    C(4)    -135.7(5) 1_555 1_555 1_555 1_555 yes
   S(1)    Ru(1)   C(3)    C(8)    -15.1(10) 1_555 1_555 1_555 1_555 yes
   S(1)    Ru(1)   C(4)    C(3)    52.9(6)  1_555 1_555 1_555 1_555 yes
   S(1)    Ru(1)   C(4)    C(5)    170.2(4) 1_555 1_555 1_555 1_555 yes
   S(1)    Ru(1)   C(4)    C(9)    -68(1)   1_555 1_555 1_555 1_555 yes
   S(1)    Ru(1)   C(5)    C(1)    96.2(8)  1_555 1_555 1_555 1_555 yes
   S(1)    Ru(1)   C(5)    C(4)    -21.2(9) 1_555 1_555 1_555 1_555 yes
   S(1)    Ru(1)   C(5)    C(10)   -140.8(8) 1_555 1_555 1_555 1_555 yes
   S(1)    Ru(2)   Pd(2)   S(2)    106.73(9) 1_555 1_555 1_555 1_555 yes
   S(1)    Ru(2)   Pd(2)   P       159.4(1) 1_555 1_555 1_555 1_555 yes
   S(1)    Ru(2)   Ru(1)   S(2)    -178.7(1) 1_555 1_555 1_555 1_555 yes
   S(1)    Ru(2)   Ru(1)   C(1)    125.4(4) 1_555 1_555 1_555 1_555 yes
   S(1)    Ru(2)   Ru(1)   C(2)    66.4(4)  1_555 1_555 1_555 1_555 yes
   S(1)    Ru(2)   Ru(1)   C(3)    5.0(5)   1_555 1_555 1_555 1_555 yes
   S(1)    Ru(2)   Ru(1)   C(4)    -80.8(7) 1_555 1_555 1_555 1_555 yes
   S(1)    Ru(2)   Ru(1)   C(5)    -170.3(5) 1_555 1_555 1_555 1_555 yes
   S(1)    Ru(2)   C(11)   C(12)   148.5(5) 1_555 1_555 1_555 1_555 yes
   S(1)    Ru(2)   C(11)   C(15)   -93.6(5) 1_555 1_555 1_555 1_555 yes
   S(1)    Ru(2)   C(11)   C(16)   29.7(9)  1_555 1_555 1_555 1_555 yes
   S(1)    Ru(2)   C(12)   C(11)   -40.3(7) 1_555 1_555 1_555 1_555 yes
   S(1)    Ru(2)   C(12)   C(13)   -157.4(4) 1_555 1_555 1_555 1_555 yes
   S(1)    Ru(2)   C(12)   C(17)   81.2(9)  1_555 1_555 1_555 1_555 yes
   S(1)    Ru(2)   C(13)   C(12)   53.9(10) 1_555 1_555 1_555 1_555 yes
   S(1)    Ru(2)   C(13)   C(14)   -64(1)   1_555 1_555 1_555 1_555 yes
   S(1)    Ru(2)   C(13)   C(18)   173.6(6) 1_555 1_555 1_555 1_555 yes
   S(1)    Ru(2)   C(14)   C(13)   153.7(4) 1_555 1_555 1_555 1_555 yes
   S(1)    Ru(2)   C(14)   C(15)   37.0(7)  1_555 1_555 1_555 1_555 yes
   S(1)    Ru(2)   C(14)   C(19)   -85.2(9) 1_555 1_555 1_555 1_555 yes
   S(1)    Ru(2)   C(15)   C(11)   90.4(5)  1_555 1_555 1_555 1_555 yes
   S(1)    Ru(2)   C(15)   C(14)   -151.8(5) 1_555 1_555 1_555 1_555 yes
   S(1)    Ru(2)   C(15)   C(20)   -30.2(9) 1_555 1_555 1_555 1_555 yes
   S(2)    Pd(2)   Ru(1)   C(1)    66.4(3)  1_555 1_555 1_555 1_555 yes
   S(2)    Pd(2)   Ru(1)   C(2)    97.0(7)  1_555 1_555 1_555 1_555 yes
   S(2)    Pd(2)   Ru(1)   C(3)    150.0(3) 1_555 1_555 1_555 1_555 yes
   S(2)    Pd(2)   Ru(1)   C(4)    129.9(3) 1_555 1_555 1_555 1_555 yes
   S(2)    Pd(2)   Ru(1)   C(5)    92.0(3)  1_555 1_555 1_555 1_555 yes
   S(2)    Pd(2)   Ru(2)   C(11)   -150.4(3) 1_555 1_555 1_555 1_555 yes
   S(2)    Pd(2)   Ru(2)   C(12)   -125.1(3) 1_555 1_555 1_555 1_555 yes
   S(2)    Pd(2)   Ru(2)   C(13)   -87.4(3) 1_555 1_555 1_555 1_555 yes
   S(2)    Pd(2)   Ru(2)   C(14)   -66.7(4) 1_555 1_555 1_555 1_555 yes
   S(2)    Pd(2)   Ru(2)   C(15)   -119.7(7) 1_555 1_555 1_555 1_555 yes
   S(2)    Pd(2)   P       C(21)   96.1(4)  1_555 1_555 1_555 1_555 yes
   S(2)    Pd(2)   P       C(27)   -145.1(3) 1_555 1_555 1_555 1_555 yes
   S(2)    Pd(2)   P       C(33)   -24.0(4) 1_555 1_555 1_555 1_555 yes
   S(2)    Ru(1)   Pd(2)   P       -61.4(1) 1_555 1_555 1_555 1_555 yes
   S(2)    Ru(1)   Ru(2)   C(11)   -173.5(5) 1_555 1_555 1_555 1_555 yes
   S(2)    Ru(1)   Ru(2)   C(12)   -79.1(7) 1_555 1_555 1_555 1_555 yes
   S(2)    Ru(1)   Ru(2)   C(13)   9.6(5)   1_555 1_555 1_555 1_555 yes
   S(2)    Ru(1)   Ru(2)   C(14)   69.7(4)  1_555 1_555 1_555 1_555 yes
   S(2)    Ru(1)   Ru(2)   C(15)   125.5(4) 1_555 1_555 1_555 1_555 yes
   S(2)    Ru(1)   C(1)    C(2)    -154.3(5) 1_555 1_555 1_555 1_555 yes
   S(2)    Ru(1)   C(1)    C(5)    88.2(5)  1_555 1_555 1_555 1_555 yes
   S(2)    Ru(1)   C(1)    C(6)    -33.3(9) 1_555 1_555 1_555 1_555 yes
   S(2)    Ru(1)   C(2)    C(1)    35.0(7)  1_555 1_555 1_555 1_555 yes
   S(2)    Ru(1)   C(2)    C(3)    152.2(4) 1_555 1_555 1_555 1_555 yes
   S(2)    Ru(1)   C(2)    C(7)    -85.6(9) 1_555 1_555 1_555 1_555 yes
   S(2)    Ru(1)   C(3)    C(2)    -69.7(10) 1_555 1_555 1_555 1_555 yes
   S(2)    Ru(1)   C(3)    C(4)    48(1)    1_555 1_555 1_555 1_555 yes
   S(2)    Ru(1)   C(3)    C(8)    168.9(7) 1_555 1_555 1_555 1_555 yes
   S(2)    Ru(1)   C(4)    C(3)    -160.0(4) 1_555 1_555 1_555 1_555 yes
   S(2)    Ru(1)   C(4)    C(5)    -42.7(6) 1_555 1_555 1_555 1_555 yes
   S(2)    Ru(1)   C(4)    C(9)    78(1)    1_555 1_555 1_555 1_555 yes
   S(2)    Ru(1)   C(5)    C(1)    -96.3(5) 1_555 1_555 1_555 1_555 yes
   S(2)    Ru(1)   C(5)    C(4)    146.2(5) 1_555 1_555 1_555 1_555 yes
   S(2)    Ru(1)   C(5)    C(10)   26.6(9)  1_555 1_555 1_555 1_555 yes
   S(2)    Ru(2)   Pd(2)   P       52.6(1)  1_555 1_555 1_555 1_555 yes
   S(2)    Ru(2)   Ru(1)   C(1)    -55.9(4) 1_555 1_555 1_555 1_555 yes
   S(2)    Ru(2)   Ru(1)   C(2)    -114.9(4) 1_555 1_555 1_555 1_555 yes
   S(2)    Ru(2)   Ru(1)   C(3)    -176.3(5) 1_555 1_555 1_555 1_555 yes
   S(2)    Ru(2)   Ru(1)   C(4)    97.9(7)  1_555 1_555 1_555 1_555 yes
   S(2)    Ru(2)   Ru(1)   C(5)    8.4(5)   1_555 1_555 1_555 1_555 yes
   S(2)    Ru(2)   C(11)   C(12)   -22(1)   1_555 1_555 1_555 1_555 yes
   S(2)    Ru(2)   C(11)   C(15)   95.2(8)  1_555 1_555 1_555 1_555 yes
   S(2)    Ru(2)   C(11)   C(16)   -141.5(6) 1_555 1_555 1_555 1_555 yes
   S(2)    Ru(2)   C(12)   C(11)   169.7(5) 1_555 1_555 1_555 1_555 yes
   S(2)    Ru(2)   C(12)   C(13)   52.6(6)  1_555 1_555 1_555 1_555 yes
   S(2)    Ru(2)   C(12)   C(17)   -68.8(9) 1_555 1_555 1_555 1_555 yes
   S(2)    Ru(2)   C(13)   C(12)   -136.1(5) 1_555 1_555 1_555 1_555 yes
   S(2)    Ru(2)   C(13)   C(14)   105.8(5) 1_555 1_555 1_555 1_555 yes
   S(2)    Ru(2)   C(13)   C(18)   -16.4(9) 1_555 1_555 1_555 1_555 yes
   S(2)    Ru(2)   C(14)   C(13)   -79.8(5) 1_555 1_555 1_555 1_555 yes
   S(2)    Ru(2)   C(14)   C(15)   163.5(5) 1_555 1_555 1_555 1_555 yes
   S(2)    Ru(2)   C(14)   C(19)   41.2(9)  1_555 1_555 1_555 1_555 yes
   S(2)    Ru(2)   C(15)   C(11)   -142.5(5) 1_555 1_555 1_555 1_555 yes
   S(2)    Ru(2)   C(15)   C(14)   -24.7(7) 1_555 1_555 1_555 1_555 yes
   S(2)    Ru(2)   C(15)   C(20)   96.9(9)  1_555 1_555 1_555 1_555 yes
   P       Pd(2)   Ru(1)   C(1)    5.0(3)   1_555 1_555 1_555 1_555 yes
   P       Pd(2)   Ru(1)   C(2)    35.7(7)  1_555 1_555 1_555 1_555 yes
   P       Pd(2)   Ru(1)   C(3)    88.6(3)  1_555 1_555 1_555 1_555 yes
   P       Pd(2)   Ru(1)   C(4)    68.5(3)  1_555 1_555 1_555 1_555 yes
   P       Pd(2)   Ru(1)   C(5)    30.6(3)  1_555 1_555 1_555 1_555 yes
   P       Pd(2)   Ru(2)   C(11)   -97.8(3) 1_555 1_555 1_555 1_555 yes
   P       Pd(2)   Ru(2)   C(12)   -72.5(3) 1_555 1_555 1_555 1_555 yes
   P       Pd(2)   Ru(2)   C(13)   -34.7(3) 1_555 1_555 1_555 1_555 yes
   P       Pd(2)   Ru(2)   C(14)   -14.1(4) 1_555 1_555 1_555 1_555 yes
   P       Pd(2)   Ru(2)   C(15)   -67.0(7) 1_555 1_555 1_555 1_555 yes
   P       C(21)   C(22)   C(23)   -177.0(10) 1_555 1_555 1_555 1_555 yes
   P       C(21)   C(26)   C(25)   177.4(9) 1_555 1_555 1_555 1_555 yes
   P       C(27)   C(28)   C(29)   173.4(8) 1_555 1_555 1_555 1_555 yes
   P       C(27)   C(32)   C(31)   -173.7(9) 1_555 1_555 1_555 1_555 yes
   P       C(33)   C(34)   C(35)   -175.3(7) 1_555 1_555 1_555 1_555 yes
   P       C(33)   C(38)   C(37)   173.7(8) 1_555 1_555 1_555 1_555 yes
   C(1)    Ru(1)   Ru(2)   C(11)   130.5(7) 1_555 1_555 1_555 1_555 yes
   C(1)    Ru(1)   Ru(2)   C(12)   -135.1(8) 1_555 1_555 1_555 1_555 yes
   C(1)    Ru(1)   Ru(2)   C(13)   -46.3(6) 1_555 1_555 1_555 1_555 yes
   C(1)    Ru(1)   Ru(2)   C(14)   13.8(5)  1_555 1_555 1_555 1_555 yes
   C(1)    Ru(1)   Ru(2)   C(15)   69.5(6)  1_555 1_555 1_555 1_555 yes
   C(1)    Ru(1)   C(2)    C(3)    117.2(8) 1_555 1_555 1_555 1_555 yes
   C(1)    Ru(1)   C(2)    C(7)    -120(1)  1_555 1_555 1_555 1_555 yes
   C(1)    Ru(1)   C(3)    C(2)    -38.1(5) 1_555 1_555 1_555 1_555 yes
   C(1)    Ru(1)   C(3)    C(4)    79.8(6)  1_555 1_555 1_555 1_555 yes
   C(1)    Ru(1)   C(3)    C(8)    -159(1)  1_555 1_555 1_555 1_555 yes
   C(1)    Ru(1)   C(4)    C(3)    -79.9(6) 1_555 1_555 1_555 1_555 yes
   C(1)    Ru(1)   C(4)    C(5)    37.4(5)  1_555 1_555 1_555 1_555 yes
   C(1)    Ru(1)   C(4)    C(9)    159(1)   1_555 1_555 1_555 1_555 yes
   C(1)    Ru(1)   C(5)    C(4)    -117.4(8) 1_555 1_555 1_555 1_555 yes
   C(1)    Ru(1)   C(5)    C(10)   122(1)   1_555 1_555 1_555 1_555 yes
   C(1)    C(2)    Ru(1)   C(3)    -117.2(8) 1_555 1_555 1_555 1_555 yes
   C(1)    C(2)    Ru(1)   C(4)    -79.7(6) 1_555 1_555 1_555 1_555 yes
   C(1)    C(2)    Ru(1)   C(5)    -37.2(5) 1_555 1_555 1_555 1_555 yes
   C(1)    C(2)    C(3)    C(4)    1(1)     1_555 1_555 1_555 1_555 yes
   C(1)    C(2)    C(3)    C(8)    -175.3(8) 1_555 1_555 1_555 1_555 yes
   C(1)    C(5)    Ru(1)   C(2)    37.8(5)  1_555 1_555 1_555 1_555 yes
   C(1)    C(5)    Ru(1)   C(3)    79.7(6)  1_555 1_555 1_555 1_555 yes
   C(1)    C(5)    Ru(1)   C(4)    117.4(8) 1_555 1_555 1_555 1_555 yes
   C(1)    C(5)    C(4)    C(3)    0.8(9)   1_555 1_555 1_555 1_555 yes
   C(1)    C(5)    C(4)    C(9)    178.3(10) 1_555 1_555 1_555 1_555 yes
   C(2)    Ru(1)   Ru(2)   C(11)   71.6(7)  1_555 1_555 1_555 1_555 yes
   C(2)    Ru(1)   Ru(2)   C(12)   166.0(8) 1_555 1_555 1_555 1_555 yes
   C(2)    Ru(1)   Ru(2)   C(13)   -105.3(6) 1_555 1_555 1_555 1_555 yes
   C(2)    Ru(1)   Ru(2)   C(14)   -45.2(5) 1_555 1_555 1_555 1_555 yes
   C(2)    Ru(1)   Ru(2)   C(15)   10.6(5)  1_555 1_555 1_555 1_555 yes
   C(2)    Ru(1)   C(1)    C(5)    -117.6(8) 1_555 1_555 1_555 1_555 yes
   C(2)    Ru(1)   C(1)    C(6)    120(1)   1_555 1_555 1_555 1_555 yes
   C(2)    Ru(1)   C(3)    C(4)    117.9(8) 1_555 1_555 1_555 1_555 yes
   C(2)    Ru(1)   C(3)    C(8)    -121(1)  1_555 1_555 1_555 1_555 yes
   C(2)    Ru(1)   C(4)    C(3)    -36.8(5) 1_555 1_555 1_555 1_555 yes
   C(2)    Ru(1)   C(4)    C(5)    80.5(6)  1_555 1_555 1_555 1_555 yes
   C(2)    Ru(1)   C(4)    C(9)    -157(1)  1_555 1_555 1_555 1_555 yes
   C(2)    Ru(1)   C(5)    C(4)    -79.6(6) 1_555 1_555 1_555 1_555 yes
   C(2)    Ru(1)   C(5)    C(10)   160(1)   1_555 1_555 1_555 1_555 yes
   C(2)    C(1)    Ru(1)   C(3)    37.1(5)  1_555 1_555 1_555 1_555 yes
   C(2)    C(1)    Ru(1)   C(4)    80.0(6)  1_555 1_555 1_555 1_555 yes
   C(2)    C(1)    Ru(1)   C(5)    117.6(8) 1_555 1_555 1_555 1_555 yes
   C(2)    C(1)    C(5)    C(4)    -0.2(10) 1_555 1_555 1_555 1_555 yes
   C(2)    C(1)    C(5)    C(10)   177.7(8) 1_555 1_555 1_555 1_555 yes
   C(2)    C(3)    Ru(1)   C(4)    -117.9(8) 1_555 1_555 1_555 1_555 yes
   C(2)    C(3)    Ru(1)   C(5)    -80.4(6) 1_555 1_555 1_555 1_555 yes
   C(2)    C(3)    C(4)    C(5)    -1.1(10) 1_555 1_555 1_555 1_555 yes
   C(2)    C(3)    C(4)    C(9)    -178.7(10) 1_555 1_555 1_555 1_555 yes
   C(3)    Ru(1)   Ru(2)   C(11)   10.1(7)  1_555 1_555 1_555 1_555 yes
   C(3)    Ru(1)   Ru(2)   C(12)   104.5(8) 1_555 1_555 1_555 1_555 yes
   C(3)    Ru(1)   Ru(2)   C(13)   -166.7(7) 1_555 1_555 1_555 1_555 yes
   C(3)    Ru(1)   Ru(2)   C(14)   -106.7(6) 1_555 1_555 1_555 1_555 yes
   C(3)    Ru(1)   Ru(2)   C(15)   -50.9(6) 1_555 1_555 1_555 1_555 yes
   C(3)    Ru(1)   C(1)    C(5)    -80.5(6) 1_555 1_555 1_555 1_555 yes
   C(3)    Ru(1)   C(1)    C(6)    158(1)   1_555 1_555 1_555 1_555 yes
   C(3)    Ru(1)   C(2)    C(7)    122(1)   1_555 1_555 1_555 1_555 yes
   C(3)    Ru(1)   C(4)    C(5)    117.3(8) 1_555 1_555 1_555 1_555 yes
   C(3)    Ru(1)   C(4)    C(9)    -121(1)  1_555 1_555 1_555 1_555 yes
   C(3)    Ru(1)   C(5)    C(4)    -37.8(5) 1_555 1_555 1_555 1_555 yes
   C(3)    Ru(1)   C(5)    C(10)   -157(1)  1_555 1_555 1_555 1_555 yes
   C(3)    C(2)    Ru(1)   C(4)    37.6(5)  1_555 1_555 1_555 1_555 yes
   C(3)    C(2)    Ru(1)   C(5)    80.1(6)  1_555 1_555 1_555 1_555 yes
   C(3)    C(2)    C(1)    C(5)    0(1)     1_555 1_555 1_555 1_555 yes
   C(3)    C(2)    C(1)    C(6)    175.8(9) 1_555 1_555 1_555 1_555 yes
   C(3)    C(4)    Ru(1)   C(5)    -117.3(8) 1_555 1_555 1_555 1_555 yes
   C(3)    C(4)    C(5)    C(10)   -177.2(8) 1_555 1_555 1_555 1_555 yes
   C(4)    Ru(1)   Ru(2)   C(11)   -75.6(8) 1_555 1_555 1_555 1_555 yes
   C(4)    Ru(1)   Ru(2)   C(12)   18.8(9)  1_555 1_555 1_555 1_555 yes
   C(4)    Ru(1)   Ru(2)   C(13)   107.5(8) 1_555 1_555 1_555 1_555 yes
   C(4)    Ru(1)   Ru(2)   C(14)   167.6(7) 1_555 1_555 1_555 1_555 yes
   C(4)    Ru(1)   Ru(2)   C(15)   -136.6(7) 1_555 1_555 1_555 1_555 yes
   C(4)    Ru(1)   C(1)    C(5)    -37.6(5) 1_555 1_555 1_555 1_555 yes
   C(4)    Ru(1)   C(1)    C(6)    -159(1)  1_555 1_555 1_555 1_555 yes
   C(4)    Ru(1)   C(2)    C(7)    159(1)   1_555 1_555 1_555 1_555 yes
   C(4)    Ru(1)   C(3)    C(8)    120(1)   1_555 1_555 1_555 1_555 yes
   C(4)    Ru(1)   C(5)    C(10)   -119(1)  1_555 1_555 1_555 1_555 yes
   C(4)    C(3)    Ru(1)   C(5)    37.5(5)  1_555 1_555 1_555 1_555 yes
   C(4)    C(3)    C(2)    C(7)    175.8(9) 1_555 1_555 1_555 1_555 yes
   C(4)    C(5)    C(1)    C(6)    -176.6(9) 1_555 1_555 1_555 1_555 yes
   C(5)    Ru(1)   Ru(2)   C(11)   -165.1(7) 1_555 1_555 1_555 1_555 yes
   C(5)    Ru(1)   Ru(2)   C(12)   -70.7(8) 1_555 1_555 1_555 1_555 yes
   C(5)    Ru(1)   Ru(2)   C(13)   18.0(7)  1_555 1_555 1_555 1_555 yes
   C(5)    Ru(1)   Ru(2)   C(14)   78.1(6)  1_555 1_555 1_555 1_555 yes
   C(5)    Ru(1)   Ru(2)   C(15)   133.9(6) 1_555 1_555 1_555 1_555 yes
   C(5)    Ru(1)   C(1)    C(6)    -121(1)  1_555 1_555 1_555 1_555 yes
   C(5)    Ru(1)   C(2)    C(7)    -157(1)  1_555 1_555 1_555 1_555 yes
   C(5)    Ru(1)   C(3)    C(8)    158(1)   1_555 1_555 1_555 1_555 yes
   C(5)    Ru(1)   C(4)    C(9)    121(1)   1_555 1_555 1_555 1_555 yes
   C(5)    C(1)    C(2)    C(7)    -175.3(9) 1_555 1_555 1_555 1_555 yes
   C(5)    C(4)    C(3)    C(8)    175.2(8) 1_555 1_555 1_555 1_555 yes
   C(6)    C(1)    C(2)    C(7)    1(1)     1_555 1_555 1_555 1_555 yes
   C(6)    C(1)    C(5)    C(10)   1(1)     1_555 1_555 1_555 1_555 yes
   C(7)    C(2)    C(3)    C(8)    0(1)     1_555 1_555 1_555 1_555 yes
   C(8)    C(3)    C(4)    C(9)    -2(1)    1_555 1_555 1_555 1_555 yes
   C(9)    C(4)    C(5)    C(10)   0(1)     1_555 1_555 1_555 1_555 yes
   C(11)   Ru(2)   C(12)   C(13)   -117.1(8) 1_555 1_555 1_555 1_555 yes
   C(11)   Ru(2)   C(12)   C(17)   121(1)   1_555 1_555 1_555 1_555 yes
   C(11)   Ru(2)   C(13)   C(12)   37.9(5)  1_555 1_555 1_555 1_555 yes
   C(11)   Ru(2)   C(13)   C(14)   -80.2(6) 1_555 1_555 1_555 1_555 yes
   C(11)   Ru(2)   C(13)   C(18)   157(1)   1_555 1_555 1_555 1_555 yes
   C(11)   Ru(2)   C(14)   C(13)   79.7(6)  1_555 1_555 1_555 1_555 yes
   C(11)   Ru(2)   C(14)   C(15)   -37.0(5) 1_555 1_555 1_555 1_555 yes
   C(11)   Ru(2)   C(14)   C(19)   -159(1)  1_555 1_555 1_555 1_555 yes
   C(11)   Ru(2)   C(15)   C(14)   117.8(8) 1_555 1_555 1_555 1_555 yes
   C(11)   Ru(2)   C(15)   C(20)   -120(1)  1_555 1_555 1_555 1_555 yes
   C(11)   C(12)   Ru(2)   C(13)   117.1(8) 1_555 1_555 1_555 1_555 yes
   C(11)   C(12)   Ru(2)   C(14)   79.7(6)  1_555 1_555 1_555 1_555 yes
   C(11)   C(12)   Ru(2)   C(15)   37.0(5)  1_555 1_555 1_555 1_555 yes
   C(11)   C(12)   C(13)   C(14)   -0.3(10) 1_555 1_555 1_555 1_555 yes
   C(11)   C(12)   C(13)   C(18)   176.9(8) 1_555 1_555 1_555 1_555 yes
   C(11)   C(15)   Ru(2)   C(12)   -37.5(5) 1_555 1_555 1_555 1_555 yes
   C(11)   C(15)   Ru(2)   C(13)   -79.8(6) 1_555 1_555 1_555 1_555 yes
   C(11)   C(15)   Ru(2)   C(14)   -117.8(8) 1_555 1_555 1_555 1_555 yes
   C(11)   C(15)   C(14)   C(13)   -1.2(10) 1_555 1_555 1_555 1_555 yes
   C(11)   C(15)   C(14)   C(19)   -175.7(9) 1_555 1_555 1_555 1_555 yes
   C(12)   Ru(2)   C(11)   C(15)   117.9(8) 1_555 1_555 1_555 1_555 yes
   C(12)   Ru(2)   C(11)   C(16)   -118(1)  1_555 1_555 1_555 1_555 yes
   C(12)   Ru(2)   C(13)   C(14)   -118.1(8) 1_555 1_555 1_555 1_555 yes
   C(12)   Ru(2)   C(13)   C(18)   119(1)   1_555 1_555 1_555 1_555 yes
   C(12)   Ru(2)   C(14)   C(13)   37.0(5)  1_555 1_555 1_555 1_555 yes
   C(12)   Ru(2)   C(14)   C(15)   -79.7(6) 1_555 1_555 1_555 1_555 yes
   C(12)   Ru(2)   C(14)   C(19)   158(1)   1_555 1_555 1_555 1_555 yes
   C(12)   Ru(2)   C(15)   C(14)   80.3(6)  1_555 1_555 1_555 1_555 yes
   C(12)   Ru(2)   C(15)   C(20)   -158(1)  1_555 1_555 1_555 1_555 yes
   C(12)   C(11)   Ru(2)   C(13)   -37.6(5) 1_555 1_555 1_555 1_555 yes
   C(12)   C(11)   Ru(2)   C(14)   -80.3(6) 1_555 1_555 1_555 1_555 yes
   C(12)   C(11)   Ru(2)   C(15)   -117.9(8) 1_555 1_555 1_555 1_555 yes
   C(12)   C(11)   C(15)   C(14)   1.1(9)   1_555 1_555 1_555 1_555 yes
   C(12)   C(11)   C(15)   C(20)   -175.8(8) 1_555 1_555 1_555 1_555 yes
   C(12)   C(13)   Ru(2)   C(14)   118.1(8) 1_555 1_555 1_555 1_555 yes
   C(12)   C(13)   Ru(2)   C(15)   80.0(6)  1_555 1_555 1_555 1_555 yes
   C(12)   C(13)   C(14)   C(15)   0.9(10)  1_555 1_555 1_555 1_555 yes
   C(12)   C(13)   C(14)   C(19)   175.5(8) 1_555 1_555 1_555 1_555 yes
   C(13)   Ru(2)   C(11)   C(15)   80.3(6)  1_555 1_555 1_555 1_555 yes
   C(13)   Ru(2)   C(11)   C(16)   -156.4(10) 1_555 1_555 1_555 1_555 yes
   C(13)   Ru(2)   C(12)   C(17)   -121(1)  1_555 1_555 1_555 1_555 yes
   C(13)   Ru(2)   C(14)   C(15)   -116.7(8) 1_555 1_555 1_555 1_555 yes
   C(13)   Ru(2)   C(14)   C(19)   121(1)   1_555 1_555 1_555 1_555 yes
   C(13)   Ru(2)   C(15)   C(14)   38.0(6)  1_555 1_555 1_555 1_555 yes
   C(13)   Ru(2)   C(15)   C(20)   159(1)   1_555 1_555 1_555 1_555 yes
   C(13)   C(12)   Ru(2)   C(14)   -37.3(5) 1_555 1_555 1_555 1_555 yes
   C(13)   C(12)   Ru(2)   C(15)   -80.1(6) 1_555 1_555 1_555 1_555 yes
   C(13)   C(12)   C(11)   C(15)   -0.5(9)  1_555 1_555 1_555 1_555 yes
   C(13)   C(12)   C(11)   C(16)   -176.6(8) 1_555 1_555 1_555 1_555 yes
   C(13)   C(14)   Ru(2)   C(15)   116.7(8) 1_555 1_555 1_555 1_555 yes
   C(13)   C(14)   C(15)   C(20)   175.6(8) 1_555 1_555 1_555 1_555 yes
   C(14)   Ru(2)   C(11)   C(15)   37.6(5)  1_555 1_555 1_555 1_555 yes
   C(14)   Ru(2)   C(11)   C(16)   160.9(10) 1_555 1_555 1_555 1_555 yes
   C(14)   Ru(2)   C(12)   C(17)   -158.8(10) 1_555 1_555 1_555 1_555 yes
   C(14)   Ru(2)   C(13)   C(18)   -122(1)  1_555 1_555 1_555 1_555 yes
   C(14)   Ru(2)   C(15)   C(20)   121(1)   1_555 1_555 1_555 1_555 yes
   C(14)   C(13)   Ru(2)   C(15)   -38.0(5) 1_555 1_555 1_555 1_555 yes
   C(14)   C(13)   C(12)   C(17)   -176.7(8) 1_555 1_555 1_555 1_555 yes
   C(14)   C(15)   C(11)   C(16)   177.0(8) 1_555 1_555 1_555 1_555 yes
   C(15)   Ru(2)   C(11)   C(16)   123(1)   1_555 1_555 1_555 1_555 yes
   C(15)   Ru(2)   C(12)   C(17)   158.5(10) 1_555 1_555 1_555 1_555 yes
   C(15)   Ru(2)   C(13)   C(18)   -160(1)  1_555 1_555 1_555 1_555 yes
   C(15)   Ru(2)   C(14)   C(19)   -122(1)  1_555 1_555 1_555 1_555 yes
   C(15)   C(11)   C(12)   C(17)   175.9(8) 1_555 1_555 1_555 1_555 yes
   C(15)   C(14)   C(13)   C(18)   -176.2(8) 1_555 1_555 1_555 1_555 yes
   C(16)   C(11)   C(12)   C(17)   0(1)     1_555 1_555 1_555 1_555 yes
   C(16)   C(11)   C(15)   C(20)   0(1)     1_555 1_555 1_555 1_555 yes
   C(17)   C(12)   C(13)   C(18)   0(1)     1_555 1_555 1_555 1_555 yes
   C(18)   C(13)   C(14)   C(19)   -1(1)    1_555 1_555 1_555 1_555 yes
   C(19)   C(14)   C(15)   C(20)   1(1)     1_555 1_555 1_555 1_555 yes
   C(21)   P       C(27)   C(28)   142.9(7) 1_555 1_555 1_555 1_555 yes
   C(21)   P       C(27)   C(32)   -42.2(9) 1_555 1_555 1_555 1_555 yes
   C(21)   P       C(33)   C(34)   -61.5(8) 1_555 1_555 1_555 1_555 yes
   C(21)   P       C(33)   C(38)   123.8(7) 1_555 1_555 1_555 1_555 yes
   C(21)   C(22)   C(23)   C(24)   -2(2)    1_555 1_555 1_555 1_555 yes
   C(21)   C(26)   C(25)   C(24)   1(2)     1_555 1_555 1_555 1_555 yes
   C(22)   C(21)   P       C(27)   -76.4(8) 1_555 1_555 1_555 1_555 yes
   C(22)   C(21)   P       C(33)   176.3(8) 1_555 1_555 1_555 1_555 yes
   C(22)   C(21)   C(26)   C(25)   -2(1)    1_555 1_555 1_555 1_555 yes
   C(22)   C(23)   C(24)   C(25)   1(2)     1_555 1_555 1_555 1_555 yes
   C(23)   C(22)   C(21)   C(26)   2(1)     1_555 1_555 1_555 1_555 yes
   C(23)   C(24)   C(25)   C(26)   0(2)     1_555 1_555 1_555 1_555 yes
   C(26)   C(21)   P       C(27)   104.1(9) 1_555 1_555 1_555 1_555 yes
   C(26)   C(21)   P       C(33)   -3.1(10) 1_555 1_555 1_555 1_555 yes
   C(27)   P       C(33)   C(34)   -170.1(7) 1_555 1_555 1_555 1_555 yes
   C(27)   P       C(33)   C(38)   15.1(8)  1_555 1_555 1_555 1_555 yes
   C(27)   C(28)   C(29)   C(30)   0(1)     1_555 1_555 1_555 1_555 yes
   C(27)   C(32)   C(31)   C(30)   0(1)     1_555 1_555 1_555 1_555 yes
   C(28)   C(27)   P       C(33)   -107.3(8) 1_555 1_555 1_555 1_555 yes
   C(28)   C(27)   C(32)   C(31)   1(1)     1_555 1_555 1_555 1_555 yes
   C(28)   C(29)   C(30)   C(31)   1(1)     1_555 1_555 1_555 1_555 yes
   C(29)   C(28)   C(27)   C(32)   -1(1)    1_555 1_555 1_555 1_555 yes
   C(29)   C(30)   C(31)   C(32)   -1(1)    1_555 1_555 1_555 1_555 yes
   C(32)   C(27)   P       C(33)   67.6(8)  1_555 1_555 1_555 1_555 yes
   C(33)   C(34)   C(35)   C(36)   1(1)     1_555 1_555 1_555 1_555 yes
   C(33)   C(38)   C(37)   C(36)   1(1)     1_555 1_555 1_555 1_555 yes
   C(34)   C(33)   C(38)   C(37)   -1(1)    1_555 1_555 1_555 1_555 yes
   C(34)   C(35)   C(36)   C(37)   0(1)     1_555 1_555 1_555 1_555 yes
   C(35)   C(34)   C(33)   C(38)   0(1)     1_555 1_555 1_555 1_555 yes
   C(35)   C(36)   C(37)   C(38)   0(1)     1_555 1_555 1_555 1_555 yes
#------------------------------------------------------------------------------
loop_
_geom_contact_atom_site_label_1
_geom_contact_atom_site_label_2
_geom_contact_distance
_geom_contact_site_symmetry_1
_geom_contact_site_symmetry_2
_geom_contact_publ_flag
 Pd(1)     Pd(2)     2.8130(8)  1_555 1_555 ?
 Pd(1)     Ru(1)     2.9266(9)  1_555 1_555 ?
 Pd(1)     Ru(2)     2.842(1)   1_555 1_555 ?
 Pd(1)     Br(1)     2.540(1)   1_555 1_555 ?
 Pd(1)     Br(2)     2.504(1)   1_555 1_555 ?
 Pd(2)     Ru(1)     3.0112(9)  1_555 1_555 ?
 Pd(2)     Ru(2)     2.9359(9)  1_555 1_555 ?
 Pd(2)     Br(1)     2.508(1)   1_555 1_555 ?
 Ru(1)     Ru(2)     2.6386(9)  1_555 1_555 ?
 Br(1)     C(39)     3.55(1)    1_555 1_555 ?
 S(1)      C(36)     3.56(1)    1_555 4_565 ?
 C(1)      C(29)     3.59(1)    1_555 2_655 ?
#------------------------------------------------------------------------------

_publ_contact_author_name           'Yasushi MIZOBE'

_publ_contact_author_address
;
    Institute of Industrial Science, The University of Tokyo, 
Komaba, Meguro-ku, Tokyo 152-8505, JAPAN
;
_publ_contact_author_email            'ymizobe@iis.u-tokyo.ac.jp'
_publ_contact_author_fax              '+81-3-5452-6361'
_publ_contact_author_phone            '+81-3-5452-6360'
_publ_contact_letter
;
    ENTER TEXT OF LETTER
;
_publ_requested_journal               'Organometallics'
_publ_requested_category              ' CHOOSE FI FM FO CI CM CO or AD'

_publ_requested_coeditor_name          ?

_publ_section_title
;
    Structures and Reactivities of Palladium-Ruthenium 
Mixed-Metal Sulfido Clusters Derived from 
Disulfido- or Hydrosulfido-Bridged Diruthenium Complexes
;

_publ_section_title_footnote
;
    ENTER FOOTNOTE TO TITLE OF PAPER
;
loop_
_publ_author_name
_publ_author_footnote
_publ_author_address'Shigeki KUWATA'
;

;
;
  Department of Applied Chemistry, 
Graduate School of Science and Engineering, 
Tokyo Institute of Technology, O-okayama, 
Meguro-ku, Tokyo 152-8552, JAPAN
;

_publ_section_synopsis
;
    ENTER SYNOPSIS
;

_publ_section_abstract
;
    ENTER ABSTRACT
;

_publ_section_comment
;
    ENTER TEXT
;

_publ_section_acknowledgements
;
    ENTER ACKNOWLEDGEMENTS
;

_publ_section_experimental
;
    ENTER EXPERIMENTAL SECTION
;

_publ_section_references
;
    ENTER OTHER REFERENCES
Molecular Structure Corporation, Rigaku Corporation. (1998). teXsan. 
Single Crystal Structure Analysis Software. Version 1.9.
MSC, 3200 Research Forest Drive, The Woodlands, TX 77381, USA.
Rigaku, 3-9-12 Akishima, Tokyo, Japan.
North, A.C.T., Phillips, D. C. & Mathews, F. S. (1968).
Acta Cryst. A24, 351-359.
Zachariasen, W. H. (1967). Acta Cryst. 23, 558-564.
;

_publ_section_table_legends
;
    ENTER TABLE LEGENDS
;

_publ_section_figure_captions
;
    ENTER FIGURE CAPTIONS
;

_publ_section_exptl_prep
;
    ENTER COMPOUND PREPARATION DETAILS
;

_publ_section_exptl_refinement
;
    ENTER SPECIAL DETAILS OF THE REFINEMENT
;

#===END

data_compound7
#------------------------------------------------------------------------------
_audit_creation_date                  'Sun Aug 16 21:19:40 1998'
_audit_creation_method                'from TEXRAY.INF file'
_audit_update_record                   ?
#------------------------------------------------------------------------------
_computing_data_collection            'Rigaku/AFC Diffractometer Control'
_computing_cell_refinement            'Rigaku/AFC Diffractometer Control'
_computing_data_reduction             'teXsan'
_computing_structure_solution          'DIRDIF92 (PATTY)'
_computing_structure_refinement       'teXsan'
_computing_publication_material       'teXsan'
_computing_molecular_graphics          ?
#------------------------------------------------------------------------------
_chemical_compound_source              ?
_chemical_name_common                  ?
_chemical_formula_weight               1345.00
_chemical_formula_analytical           ?
_chemical_formula_sum                  'C56 H60 Cl2 P2 Pd2 Ru2 S2 '
_chemical_formula_moiety               '?'
_chemical_formula_structural           ?
_chemical_melting_point                ?
#------------------------------------------------------------------------------
_cell_length_a                         16.409(2)
_cell_length_b                         15.248(2)
_cell_length_c                         21.954(1)
_cell_angle_alpha                      90
_cell_angle_beta                       90.096(6)
_cell_angle_gamma                      90
_cell_volume                           5493.0(8)
_cell_formula_units_Z                  4
_cell_measurement_temperature          293.2
_cell_measurement_reflns_used          25
_cell_measurement_theta_min            18.5
_cell_measurement_theta_max            19.9
#------------------------------------------------------------------------------
_symmetry_cell_setting                 monoclinic
_symmetry_space_group_name_H-M        'P 21/n       '
_symmetry_Int_Tables_number            14
_symmetry_space_group_name_Hall        ?
loop_
_symmetry_equiv_pos_as_xyz
x,y,z
1/2-x,1/2+y,1/2-z
-x,-y,-z
1/2+x,1/2-y,1/2+z
#------------------------------------------------------------------------------
_exptl_crystal_description            'prismatic'
_exptl_crystal_colour                 'black'
_exptl_crystal_size_max                0.600
_exptl_crystal_size_mid                0.350
_exptl_crystal_size_min                0.200
_exptl_crystal_density_diffrn          1.626
_exptl_crystal_density_method         'not measured'
_exptl_crystal_F_000                   2688.00
_exptl_absorpt_coefficient_mu          1.451
_exptl_absorpt_correction_type         psi-scan
_exptl_absorpt_process_details        '(North, Phillips & Mathews, 1968)'
_exptl_absorpt_correction_T_min        0.708
_exptl_absorpt_correction_T_max        1.000
_exptl_special_details
;
 ?
;
#------------------------------------------------------------------------------
_diffrn_special_details
;
 ?
;
_diffrn_ambient_temperature            293.2
_diffrn_radiation_wavelength           0.7107
_diffrn_radiation_type                'Mo K\a'
_diffrn_radiation_source              'Rigaku rotating anode'
_diffrn_radiation_monochromator        graphite
_diffrn_radiation_detector            'scintillation counter'
_diffrn_measurement_device_type       'Rigaku AFC7R'
_diffrn_measurement_method             \w-2\q

_diffrn_standards_number              3
_diffrn_standards_interval_count      150
_diffrn_standards_decay_%             -0.69
loop_
_diffrn_standard_refln_index_h
_diffrn_standard_refln_index_k
_diffrn_standard_refln_index_l
      0      -2      2
     -1      -2      3
      1      -2      4
_diffrn_reflns_number                  13536
_reflns_number_total                   13093
_reflns_number_gt                      6994
_reflns_observed_criterion             '>3.0sigma(I)'
_diffrn_reflns_av_R_equivalents        0.033
_diffrn_reflns_av_sigmaI/netI          0.000
_diffrn_reflns_limit_h_min             0
_diffrn_reflns_limit_h_max             21
_diffrn_reflns_limit_k_min             0
_diffrn_reflns_limit_k_max             19
_diffrn_reflns_limit_l_min             -28
_diffrn_reflns_limit_l_max             28
_diffrn_reflns_theta_min               0.00
_diffrn_reflns_theta_max               0.00
_diffrn_reflns_reduction_process      'Lp corrections applied'
_diffrn_orient_matrix_UB_11            0.00339
_diffrn_orient_matrix_UB_12            0.00135
_diffrn_orient_matrix_UB_13            0.04547
_diffrn_orient_matrix_UB_21           -0.06008
_diffrn_orient_matrix_UB_22           -0.01032
_diffrn_orient_matrix_UB_23            0.00258
_diffrn_orient_matrix_UB_31            0.00965
_diffrn_orient_matrix_UB_32           -0.06475
_diffrn_orient_matrix_UB_33            0.00054
#------------------------------------------------------------------------------
loop_
_atom_type_symbol
_atom_type_description
_atom_type_scat_dispersion_real
_atom_type_scat_dispersion_imag
_atom_type_scat_source
  'C'  'C'   0.003 0.002 
;International Tables for Crystallography
(1992, Vol. C, Tables 4.2.6.8 and 6.1.1.1)
;
  'H'  'H'   0.000 0.000 
;International Tables for Crystallography
(1992, Vol. C, Table 6.1.1.2)
;
  'S'  'S'   0.125 0.123 
;International Tables for Crystallography
(1992, Vol. C, Tables 4.2.6.8 and 6.1.1.1)
;
  'P'  'P'   0.102 0.094 
;International Tables for Crystallography
(1992, Vol. C, Tables 4.2.6.8 and 6.1.1.1)
;
  'RuRu'   -1.259 0.836 
;International Tables for Crystallography
(1992, Vol. C, Tables 4.2.6.8 and 6.1.1.1)
;
  'PdPd'   -0.999 1.007 
;International Tables for Crystallography
(1992, Vol. C, Tables 4.2.6.8 and 6.1.1.1)
;
  'ClCl'   0.148 0.159 
;International Tables for Crystallography
(1992, Vol. C, Tables 4.2.6.8 and 6.1.1.1)
;
#------------------------------------------------------------------------------
loop_
_atom_site_label
_atom_site_type_symbol
_atom_site_fract_x
_atom_site_fract_y
_atom_site_fract_z
_atom_site_U_iso_or_equiv
_atom_site_adp_type
_atom_site_occupancy
_atom_site_calc_flag
_atom_site_refinement_flags
_atom_site_disorder_assembly
_atom_site_disorder_group
 Pd(1)  Pd 0.49440(3)  0.69038(3)  0.25607(2)  0.0364(2)   Uani 1.00 d ...
 Pd(2)  Pd 0.36074(3)  0.72214(3)  0.33240(2)  0.0354(2)   Uani 1.00 d ...
 Ru(1)  Ru 0.49613(3)  0.85788(3)  0.32748(2)  0.0323(2)   Uani 1.00 d ...
 Ru(2)  Ru 0.52198(3)  0.70956(3)  0.38487(2)  0.0315(2)   Uani 1.00 d ...
 Cl(1)  Cl 0.35945(10) 0.6308(1)   0.24359(8)  0.0632(7)   Uani 1.00 d ...
 Cl(2)  Cl 0.6204(1)   0.1210(1)   0.13465(10) 0.0751(8)   Uani 1.00 d ...
 S(1)   S  0.59413(9)  0.7600(1)   0.30506(7)  0.0365(5)   Uani 1.00 d ...
 S(2)   S  0.41962(9)  0.8042(1)   0.40408(7)  0.0357(5)   Uani 1.00 d ...
 P(1)   P  0.56234(9)  0.6466(1)   0.16977(7)  0.0321(5)   Uani 1.00 d ...
 P(2)   P  0.22568(9)  0.7289(1)   0.36052(7)  0.0327(5)   Uani 1.00 d ...
 C(1)   C  0.5399(4)   0.9900(4)   0.3424(3)   0.047(2)    Uani 1.00 d ...
 C(2)   C  0.5634(4)   0.9657(4)   0.2836(3)   0.042(2)    Uani 1.00 d ...
 C(3)   C  0.4933(5)   0.9487(4)   0.2494(3)   0.045(2)    Uani 1.00 d ...
 C(4)   C  0.4260(4)   0.9658(4)   0.2878(4)   0.051(3)    Uani 1.00 d ...
 C(5)   C  0.4550(5)   0.9925(4)   0.3438(3)   0.053(3)    Uani 1.00 d ...
 C(6)   C  0.5971(6)   1.0190(5)   0.3918(4)   0.097(4)    Uani 1.00 d ...
 C(7)   C  0.6499(4)   0.9626(5)   0.2591(4)   0.073(3)    Uani 1.00 d ...
 C(8)   C  0.4930(5)   0.9284(5)   0.1819(3)   0.082(3)    Uani 1.00 d ...
 C(9)   C  0.3383(5)   0.9635(5)   0.2673(4)   0.098(4)    Uani 1.00 d ...
 C(10)  C  0.4039(6)   1.0240(5)   0.3961(4)   0.115(4)    Uani 1.00 d ...
 C(11)  C  0.5182(4)   0.5690(4)   0.4101(3)   0.041(2)    Uani 1.00 d ...
 C(12)  C  0.4889(4)   0.6177(5)   0.4592(3)   0.045(2)    Uani 1.00 d ...
 C(13)  C  0.5516(4)   0.6758(4)   0.4785(3)   0.044(2)    Uani 1.00 d ...
 C(14)  C  0.6213(4)   0.6602(4)   0.4412(3)   0.041(2)    Uani 1.00 d ...
 C(15)  C  0.5997(4)   0.5920(4)   0.4001(3)   0.041(2)    Uani 1.00 d ...
 C(16)  C  0.4743(4)   0.4957(5)   0.3790(3)   0.062(3)    Uani 1.00 d ...
 C(17)  C  0.4058(4)   0.6082(5)   0.4892(3)   0.069(3)    Uani 1.00 d ...
 C(18)  C  0.5477(5)   0.7407(5)   0.5303(3)   0.079(3)    Uani 1.00 d ...
 C(19)  C  0.7034(4)   0.7026(5)   0.4484(3)   0.072(3)    Uani 1.00 d ...
 C(20)  C  0.6574(4)   0.5509(4)   0.3561(3)   0.063(3)    Uani 1.00 d ...
 C(21)  C  0.2025(3)   0.8301(4)   0.4006(3)   0.036(2)    Uani 1.00 d ...
 C(22)  C  0.2340(4)   0.8434(5)   0.4587(3)   0.045(2)    Uani 1.00 d ...
 C(23)  C  0.2267(4)   0.9226(6)   0.4877(3)   0.060(3)    Uani 1.00 d ...
 C(24)  C  0.1876(5)   0.9908(5)   0.4595(4)   0.073(3)    Uani 1.00 d ...
 C(25)  C  0.1560(5)   0.9794(5)   0.4026(4)   0.065(3)    Uani 1.00 d ...
 C(26)  C  0.1625(4)   0.8998(5)   0.3728(3)   0.051(2)    Uani 1.00 d ...
 C(27)  C  0.1540(3)   0.7232(4)   0.2975(3)   0.035(2)    Uani 1.00 d ...
 C(28)  C  0.0780(4)   0.6840(4)   0.3023(3)   0.039(2)    Uani 1.00 d ...
 C(29)  C  0.0268(4)   0.6797(4)   0.2515(3)   0.048(2)    Uani 1.00 d ...
 C(30)  C  0.0494(4)   0.7156(6)   0.1978(3)   0.061(3)    Uani 1.00 d ...
 C(31)  C  0.1249(5)   0.7552(6)   0.1921(3)   0.079(3)    Uani 1.00 d ...
 C(32)  C  0.1772(4)   0.7584(5)   0.2413(3)   0.061(3)    Uani 1.00 d ...
 C(33)  C  0.1927(4)   0.6401(5)   0.4104(3)   0.039(2)    Uani 1.00 d ...
 C(34)  C  0.1340(5)   0.6509(5)   0.4553(3)   0.064(3)    Uani 1.00 d ...
 C(35)  C  0.1116(6)   0.5800(6)   0.4911(4)   0.087(4)    Uani 1.00 d ...
 C(36)  C  0.1463(6)   0.5013(6)   0.4836(4)   0.090(4)    Uani 1.00 d ...
 C(37)  C  0.2039(5)   0.4897(6)   0.4384(5)   0.087(4)    Uani 1.00 d ...
 C(38)  C  0.2265(4)   0.5595(5)   0.4022(3)   0.056(3)    Uani 1.00 d ...
 C(39)  C  0.5845(4)   0.5303(4)   0.1696(3)   0.032(2)    Uani 1.00 d ...
 C(40)  C  0.5312(4)   0.4751(5)   0.1989(3)   0.053(3)    Uani 1.00 d ...
 C(41)  C  0.5455(5)   0.3854(5)   0.1981(4)   0.074(3)    Uani 1.00 d ...
 C(42)  C  0.6105(6)   0.3512(5)   0.1693(4)   0.070(3)    Uani 1.00 d ...
 C(43)  C  0.6639(5)   0.4046(6)   0.1415(4)   0.065(3)    Uani 1.00 d ...
 C(44)  C  0.6510(4)   0.4946(5)   0.1417(3)   0.050(2)    Uani 1.00 d ...
 C(45)  C  0.6612(3)   0.6980(4)   0.1584(3)   0.034(2)    Uani 1.00 d ...
 C(46)  C  0.7236(4)   0.6799(4)   0.1994(3)   0.045(2)    Uani 1.00 d ...
 C(47)  C  0.7976(4)   0.7240(6)   0.1954(3)   0.063(3)    Uani 1.00 d ...
 C(48)  C  0.8090(4)   0.7865(6)   0.1506(4)   0.072(3)    Uani 1.00 d ...
 C(49)  C  0.7474(5)   0.8058(5)   0.1114(4)   0.072(3)    Uani 1.00 d ...
 C(50)  C  0.6743(4)   0.7616(5)   0.1148(3)   0.051(2)    Uani 1.00 d ...
 C(51)  C  0.5073(4)   0.6666(4)   0.0991(3)   0.035(2)    Uani 1.00 d ...
 C(52)  C  0.5256(4)   0.6256(5)   0.0447(3)   0.050(2)    Uani 1.00 d ...
 C(53)  C  0.4871(4)   0.6492(6)   -0.0087(3)  0.063(3)    Uani 1.00 d ...
 C(54)  C  0.4297(5)   0.7141(6)   -0.0079(4)  0.077(3)    Uani 1.00 d ...
 C(55)  C  0.4070(5)   0.7518(6)   0.0458(4)   0.091(4)    Uani 1.00 d ...
 C(56)  C  0.4460(5)   0.7281(5)   0.0989(3)   0.065(3)    Uani 1.00 d ...
 H(1)   H  0.6355      0.9739      0.3998      0.1169      Uiso 1.00 calc ...
 H(2)   H  0.6250      1.0705      0.3791      0.1169      Uiso 1.00 calc ...
 H(3)   H  0.5670      1.0312      0.4278      0.1169      Uiso 1.00 calc ...
 H(4)   H  0.6614      0.9051      0.2448      0.0879      Uiso 1.00 calc ...
 H(5)   H  0.6553      1.0032      0.2265      0.0879      Uiso 1.00 calc ...
 H(6)   H  0.6870      0.9774      0.2907      0.0879      Uiso 1.00 calc ...
 H(7)   H  0.4387      0.9190      0.1685      0.0984      Uiso 1.00 calc ...
 H(8)   H  0.5159      0.9764      0.1602      0.0984      Uiso 1.00 calc ...
 H(9)   H  0.5245      0.8772      0.1745      0.0984      Uiso 1.00 calc ...
 H(10)  H  0.3038      0.9759      0.3009      0.1180      Uiso 1.00 calc ...
 H(11)  H  0.3300      1.0063      0.2364      0.1180      Uiso 1.00 calc ...
 H(12)  H  0.3259      0.9070      0.2516      0.1180      Uiso 1.00 calc ...
 H(13)  H  0.4173      1.0833      0.4049      0.1393      Uiso 1.00 calc ...
 H(14)  H  0.3480      1.0199      0.3856      0.1393      Uiso 1.00 calc ...
 H(15)  H  0.4147      0.9888      0.4309      0.1393      Uiso 1.00 calc ...
 H(16)  H  0.4200      0.4926      0.3937      0.0747      Uiso 1.00 calc ...
 H(17)  H  0.4736      0.5058      0.3363      0.0747      Uiso 1.00 calc ...
 H(18)  H  0.5015      0.4419      0.3872      0.0747      Uiso 1.00 calc ...
 H(19)  H  0.4010      0.6495      0.5214      0.0830      Uiso 1.00 calc ...
 H(20)  H  0.3642      0.6188      0.4599      0.0830      Uiso 1.00 calc ...
 H(21)  H  0.4001      0.5505      0.5049      0.0830      Uiso 1.00 calc ...
 H(22)  H  0.5873      0.7258      0.5602      0.0949      Uiso 1.00 calc ...
 H(23)  H  0.5585      0.7980      0.5153      0.0949      Uiso 1.00 calc ...
 H(24)  H  0.4950      0.7394      0.5481      0.0949      Uiso 1.00 calc ...
 H(25)  H  0.7249      0.6892      0.4875      0.0864      Uiso 1.00 calc ...
 H(26)  H  0.7393      0.6810      0.4180      0.0864      Uiso 1.00 calc ...
 H(27)  H  0.6981      0.7643      0.4442      0.0864      Uiso 1.00 calc ...
 H(28)  H  0.6647      0.4908      0.3663      0.0754      Uiso 1.00 calc ...
 H(29)  H  0.6357      0.5553      0.3161      0.0754      Uiso 1.00 calc ...
 H(30)  H  0.7084      0.5803      0.3580      0.0754      Uiso 1.00 calc ...
 H(31)  H  0.2612      0.7965      0.4788      0.0539      Uiso 1.00 calc ...
 H(32)  H  0.2489      0.9303      0.5274      0.0721      Uiso 1.00 calc ...
 H(33)  H  0.1825      1.0457      0.4795      0.0875      Uiso 1.00 calc ...
 H(34)  H  0.1291      1.0269      0.3830      0.0776      Uiso 1.00 calc ...
 H(35)  H  0.1396      0.8927      0.3334      0.0616      Uiso 1.00 calc ...
 H(36)  H  0.0608      0.6600      0.3401      0.0468      Uiso 1.00 calc ...
 H(37)  H  -0.0245     0.6513      0.2547      0.0577      Uiso 1.00 calc ...
 H(38)  H  0.0135      0.7136      0.1639      0.0738      Uiso 1.00 calc ...
 H(39)  H  0.1406      0.7803      0.1544      0.0946      Uiso 1.00 calc ...
 H(40)  H  0.2294      0.7846      0.2370      0.0727      Uiso 1.00 calc ...
 H(41)  H  0.1094      0.7066      0.4615      0.0766      Uiso 1.00 calc ...
 H(42)  H  0.0711      0.5874      0.5215      0.1040      Uiso 1.00 calc ...
 H(43)  H  0.1314      0.4538      0.5091      0.1085      Uiso 1.00 calc ...
 H(44)  H  0.2277      0.4336      0.4322      0.1043      Uiso 1.00 calc ...
 H(45)  H  0.2661      0.5512      0.3712      0.0668      Uiso 1.00 calc ...
 H(46)  H  0.4850      0.4981      0.2195      0.0637      Uiso 1.00 calc ...
 H(47)  H  0.5086      0.3473      0.2183      0.0884      Uiso 1.00 calc ...
 H(48)  H  0.6187      0.2896      0.1687      0.0837      Uiso 1.00 calc ...
 H(49)  H  0.7103      0.3809      0.1216      0.0776      Uiso 1.00 calc ...
 H(50)  H  0.6891      0.5319      0.1221      0.0603      Uiso 1.00 calc ...
 H(51)  H  0.7157      0.6371      0.2303      0.0544      Uiso 1.00 calc ...
 H(52)  H  0.8402      0.7112      0.2234      0.0757      Uiso 1.00 calc ...
 H(53)  H  0.8598      0.8159      0.1473      0.0864      Uiso 1.00 calc ...
 H(54)  H  0.7548      0.8500      0.0815      0.0867      Uiso 1.00 calc ...
 H(55)  H  0.6322      0.7751      0.0865      0.0614      Uiso 1.00 calc ...
 H(56)  H  0.5655      0.5803      0.0441      0.0603      Uiso 1.00 calc ...
 H(57)  H  0.5004      0.6206      -0.0458     0.0753      Uiso 1.00 calc ...
 H(58)  H  0.4052      0.7329      -0.0449     0.0922      Uiso 1.00 calc ...
 H(59)  H  0.3647      0.7942      0.0465      0.1095      Uiso 1.00 calc ...
 H(60)  H  0.4302      0.7549      0.1361      0.0774      Uiso 1.00 calc ...

loop_
_atom_site_aniso_label
_atom_site_aniso_U_11
_atom_site_aniso_U_22
_atom_site_aniso_U_33
_atom_site_aniso_U_12
_atom_site_aniso_U_13
_atom_site_aniso_U_23
 Pd(1)  0.0328(3)   0.0452(3)   0.0311(3)   -0.0015(3)  0.0042(2)   -0.0066(3) 
 Pd(2)  0.0294(3)   0.0432(3)   0.0335(3)   0.0007(3)   0.0024(2)   -0.0041(3) 
 Ru(1)  0.0342(3)   0.0289(3)   0.0337(3)   -0.0010(3)  0.0006(2)   0.0004(3)  
 Ru(2)  0.0331(3)   0.0348(3)   0.0267(3)   0.0032(3)   -0.0030(2)  0.0017(3)  
 Cl(1)  0.039(1)    0.093(2)    0.058(1)    -0.013(1)   0.0066(9)   -0.039(1)  
 Cl(2)  0.078(2)    0.061(1)    0.086(2)    0.006(1)    0.026(1)    0.008(1)   
 S(1)   0.0336(9)   0.040(1)    0.036(1)    -0.0006(8)  0.0019(8)   0.0013(8)  
 S(2)   0.0383(9)   0.037(1)    0.0318(9)   0.0027(8)   0.0015(7)   -0.0007(8) 
 P(1)   0.0327(10)  0.036(1)    0.0277(10)  -0.0003(8)  0.0016(8)   0.0000(8)  
 P(2)   0.0326(9)   0.038(1)    0.0279(9)   0.0001(8)   0.0001(7)   0.0001(9)  
 C(1)   0.063(5)    0.037(4)    0.040(5)    -0.011(4)   -0.009(4)   -0.002(4)  
 C(2)   0.046(4)    0.029(4)    0.050(5)    -0.007(3)   -0.003(4)   0.010(4)   
 C(3)   0.071(5)    0.027(4)    0.036(4)    -0.006(4)   -0.006(4)   0.005(3)   
 C(4)   0.040(4)    0.030(4)    0.083(6)    -0.003(3)   0.001(4)    0.019(4)   
 C(5)   0.078(6)    0.029(4)    0.051(6)    -0.002(4)   0.020(5)    -0.003(4)  
 C(6)   0.151(9)    0.076(7)    0.064(6)    -0.057(6)   -0.023(6)   -0.005(5)  
 C(7)   0.058(5)    0.063(6)    0.098(7)    -0.010(5)   0.005(5)    0.021(5)   
 C(8)   0.140(8)    0.060(6)    0.045(5)    -0.018(6)   -0.022(5)   0.010(5)   
 C(9)   0.049(5)    0.074(6)    0.17(1)     0.002(5)    -0.007(6)   0.060(6)   
 C(10)  0.18(1)     0.050(6)    0.116(9)    0.015(6)    0.088(8)    0.004(6)   
 C(11)  0.046(4)    0.042(4)    0.034(4)    -0.001(4)   -0.010(3)   0.005(4)   
 C(12)  0.040(4)    0.054(5)    0.039(4)    0.000(4)    -0.012(3)   0.021(4)   
 C(13)  0.061(5)    0.049(5)    0.023(4)    0.014(4)    -0.008(3)   0.007(3)   
 C(14)  0.040(4)    0.041(4)    0.042(4)    0.008(3)    -0.016(3)   0.011(4)   
 C(15)  0.047(4)    0.042(4)    0.035(4)    0.015(4)    -0.002(3)   0.006(4)   
 C(16)  0.072(6)    0.049(5)    0.065(6)    -0.006(4)   -0.019(4)   0.009(4)   
 C(17)  0.056(5)    0.099(7)    0.052(5)    -0.001(5)   0.007(4)    0.036(5)   
 C(18)  0.095(6)    0.101(7)    0.040(5)    0.018(5)    -0.016(4)   -0.011(5)  
 C(19)  0.044(4)    0.090(7)    0.081(6)    0.002(5)    -0.021(4)   0.006(5)   
 C(20)  0.077(6)    0.047(5)    0.065(6)    0.025(4)    0.004(4)    0.007(4)   
 C(21)  0.025(4)    0.041(4)    0.043(4)    -0.002(3)   0.008(3)    -0.005(3)  
 C(22)  0.039(4)    0.057(5)    0.039(4)    0.001(4)    0.007(3)    -0.002(4)  
 C(23)  0.047(5)    0.082(7)    0.051(5)    -0.011(5)   0.016(4)    -0.034(5)  
 C(24)  0.067(6)    0.056(6)    0.095(8)    -0.002(5)   0.030(6)    -0.029(6)  
 C(25)  0.073(6)    0.042(5)    0.079(7)    0.015(4)    0.021(5)    0.007(5)   
 C(26)  0.043(5)    0.054(5)    0.056(5)    0.008(4)    0.011(4)    0.002(4)   
 C(27)  0.035(4)    0.044(4)    0.024(3)    0.000(3)    0.000(3)    -0.002(3)  
 C(28)  0.041(4)    0.034(4)    0.042(4)    0.004(3)    -0.001(3)   0.000(3)   
 C(29)  0.037(4)    0.046(5)    0.062(5)    0.005(3)    -0.013(4)   -0.014(4)  
 C(30)  0.057(5)    0.087(7)    0.039(5)    0.004(5)    -0.015(4)   -0.011(5)  
 C(31)  0.075(6)    0.131(9)    0.030(5)    -0.012(6)   -0.013(4)   0.012(5)   
 C(32)  0.039(4)    0.094(7)    0.049(5)    -0.013(4)   0.001(4)    0.016(5)   
 C(33)  0.038(4)    0.043(4)    0.036(4)    -0.009(4)   0.000(3)    0.008(4)   
 C(34)  0.085(6)    0.055(5)    0.051(5)    -0.013(5)   0.020(4)    0.002(4)   
 C(35)  0.127(9)    0.068(7)    0.065(6)    -0.038(6)   0.039(6)    -0.008(6)  
 C(36)  0.130(10)   0.064(7)    0.077(8)    -0.029(7)   -0.004(6)   0.034(6)   
 C(37)  0.088(8)    0.058(6)    0.115(9)    -0.008(6)   -0.006(6)   0.019(6)   
 C(38)  0.048(5)    0.050(5)    0.069(6)    -0.003(4)   0.000(4)    0.009(5)   
 C(39)  0.039(4)    0.030(4)    0.027(4)    0.000(3)    -0.005(3)   -0.004(3)  
 C(40)  0.057(5)    0.045(5)    0.057(5)    -0.008(4)   -0.003(4)   0.005(4)   
 C(41)  0.101(8)    0.048(6)    0.072(7)    -0.021(5)   -0.008(5)   0.015(5)   
 C(42)  0.100(8)    0.046(6)    0.063(6)    0.015(5)    -0.033(5)   -0.014(5)  
 C(43)  0.068(6)    0.061(6)    0.066(6)    0.014(5)    -0.003(5)   -0.013(5)  
 C(44)  0.058(5)    0.039(5)    0.053(5)    0.008(4)    0.010(4)    0.003(4)   
 C(45)  0.035(4)    0.040(4)    0.025(4)    0.002(3)    0.002(3)    -0.006(3)  
 C(46)  0.039(4)    0.049(5)    0.048(5)    0.005(4)    0.004(3)    0.002(4)   
 C(47)  0.030(4)    0.088(7)    0.072(6)    -0.006(4)   -0.007(4)   -0.024(5)  
 C(48)  0.049(5)    0.078(7)    0.090(7)    -0.026(5)   0.016(5)    0.001(6)   
 C(49)  0.065(6)    0.081(7)    0.072(6)    -0.029(5)   0.006(5)    0.010(5)   
 C(50)  0.050(5)    0.063(5)    0.041(4)    -0.023(4)   -0.003(4)   0.007(4)   
 C(51)  0.032(4)    0.039(4)    0.035(4)    -0.005(3)   -0.002(3)   0.002(3)   
 C(52)  0.039(4)    0.074(6)    0.037(4)    0.005(4)    0.002(3)    -0.004(4)  
 C(53)  0.057(5)    0.105(7)    0.026(4)    -0.005(5)   -0.003(4)   -0.007(5)  
 C(54)  0.087(7)    0.088(7)    0.055(6)    -0.007(6)   -0.035(5)   0.026(6)   
 C(55)  0.128(8)    0.078(7)    0.068(6)    0.051(6)    -0.052(6)   -0.021(5)  
 C(56)  0.084(6)    0.059(5)    0.050(5)    0.024(5)    -0.022(4)   -0.016(4)  
#------------------------------------------------------------------------------
_refine_special_details
;
;

_refine_ls_structure_factor_coef       F
_refine_ls_matrix_type                 full
_refine_ls_weighting_scheme            calc
_refine_ls_weighting_details
   'w = 1/[\s^2^(Fo) + 0.00000|Fo|^2^]'
_refine_ls_hydrogen_treatment          noref
_refine_ls_extinction_method           none
_refine_ls_extinction_coef             ?
_refine_ls_abs_structure_details       ?
_refine_ls_abs_structure_Flack         ?
_refine_ls_number_reflns               6994
_refine_ls_number_parameters           595
_refine_ls_number_restraints           0
_refine_ls_number_constraints          0
_refine_ls_R_factor_all                0.0425
_refine_ls_R_factor_gt                 0.0425
_refine_ls_wR_factor_all               ?
_refine_ls_wR_factor_ref               0.0270
_refine_ls_wR_factor_gt                0.0270
_refine_ls_goodness_of_fit_all         ?
_refine_ls_goodness_of_fit_ref         1.640
_refine_ls_shift/su_max                0.0310
_refine_ls_shift/su_mean               0.0030
_refine_diff_density_min               -0.82
_refine_diff_density_max               0.64
#------------------------------------------------------------------------------
_geom_special_details
;
 ?
;
loop_
_geom_bond_atom_site_label_1
_geom_bond_atom_site_label_2
_geom_bond_distance
_geom_bond_site_symmetry_1
_geom_bond_site_symmetry_2
_geom_bond_publ_flag
 Pd(1)     Pd(2)     2.8044(7)  1_555 1_555 yes
 Pd(1)     Ru(1)     2.9970(7)  1_555 1_555 yes
 Pd(1)     Ru(2)     2.8778(7)  1_555 1_555 yes
 Pd(1)     Cl(1)     2.409(2)   1_555 1_555 yes
 Pd(1)     S(1)      2.226(2)   1_555 1_555 yes
 Pd(1)     P(1)      2.299(2)   1_555 1_555 yes
 Pd(2)     Ru(1)     3.0385(7)  1_555 1_555 yes
 Pd(2)     Ru(2)     2.8903(7)  1_555 1_555 yes
 Pd(2)     Cl(1)     2.396(2)   1_555 1_555 yes
 Pd(2)     S(2)      2.229(2)   1_555 1_555 yes
 Pd(2)     P(2)      2.304(2)   1_555 1_555 yes
 Ru(1)     Ru(2)     2.6231(7)  1_555 1_555 yes
 Ru(1)     S(1)      2.249(2)   1_555 1_555 yes
 Ru(1)     S(2)      2.254(2)   1_555 1_555 yes
 Ru(1)     C(1)      2.164(7)   1_555 1_555 yes
 Ru(1)     C(2)      2.203(6)   1_555 1_555 yes
 Ru(1)     C(3)      2.205(6)   1_555 1_555 yes
 Ru(1)     C(4)      2.189(7)   1_555 1_555 yes
 Ru(1)     C(5)      2.190(7)   1_555 1_555 yes
 Ru(2)     S(1)      2.252(2)   1_555 1_555 yes
 Ru(2)     S(2)      2.254(2)   1_555 1_555 yes
 Ru(2)     C(11)     2.215(6)   1_555 1_555 yes
 Ru(2)     C(12)     2.218(6)   1_555 1_555 yes
 Ru(2)     C(13)     2.173(6)   1_555 1_555 yes
 Ru(2)     C(14)     2.178(6)   1_555 1_555 yes
 Ru(2)     C(15)     2.225(6)   1_555 1_555 yes
 P(1)      C(39)     1.810(6)   1_555 1_555 yes
 P(1)      C(45)     1.820(6)   1_555 1_555 yes
 P(1)      C(51)     1.820(6)   1_555 1_555 yes
 P(2)      C(21)     1.817(6)   1_555 1_555 yes
 P(2)      C(27)     1.817(6)   1_555 1_555 yes
 P(2)      C(33)     1.824(6)   1_555 1_555 yes
 C(1)      C(2)      1.398(8)   1_555 1_555 yes
 C(1)      C(5)      1.395(9)   1_555 1_555 yes
 C(1)      C(6)      1.500(9)   1_555 1_555 yes
 C(2)      C(3)      1.397(8)   1_555 1_555 yes
 C(2)      C(7)      1.519(8)   1_555 1_555 yes
 C(3)      C(4)      1.415(9)   1_555 1_555 yes
 C(3)      C(8)      1.513(9)   1_555 1_555 yes
 C(4)      C(5)      1.380(9)   1_555 1_555 yes
 C(4)      C(9)      1.507(9)   1_555 1_555 yes
 C(5)      C(10)     1.503(9)   1_555 1_555 yes
 C(11)     C(12)     1.394(8)   1_555 1_555 yes
 C(11)     C(15)     1.402(8)   1_555 1_555 yes
 C(11)     C(16)     1.494(8)   1_555 1_555 yes
 C(12)     C(13)     1.422(8)   1_555 1_555 yes
 C(12)     C(17)     1.522(8)   1_555 1_555 yes
 C(13)     C(14)     1.427(8)   1_555 1_555 yes
 C(13)     C(18)     1.510(9)   1_555 1_555 yes
 C(14)     C(15)     1.421(8)   1_555 1_555 yes
 C(14)     C(19)     1.503(8)   1_555 1_555 yes
 C(15)     C(20)     1.491(8)   1_555 1_555 yes
 C(21)     C(22)     1.391(8)   1_555 1_555 yes
 C(21)     C(26)     1.389(8)   1_555 1_555 yes
 C(22)     C(23)     1.371(9)   1_555 1_555 yes
 C(23)     C(24)     1.37(1)    1_555 1_555 yes
 C(24)     C(25)     1.36(1)    1_555 1_555 yes
 C(25)     C(26)     1.383(9)   1_555 1_555 yes
 C(27)     C(28)     1.387(7)   1_555 1_555 yes
 C(27)     C(32)     1.398(8)   1_555 1_555 yes
 C(28)     C(29)     1.397(8)   1_555 1_555 yes
 C(29)     C(30)     1.352(9)   1_555 1_555 yes
 C(30)     C(31)     1.384(9)   1_555 1_555 yes
 C(31)     C(32)     1.380(8)   1_555 1_555 yes
 C(33)     C(34)     1.389(8)   1_555 1_555 yes
 C(33)     C(38)     1.361(9)   1_555 1_555 yes
 C(34)     C(35)     1.387(10)  1_555 1_555 yes
 C(35)     C(36)     1.34(1)    1_555 1_555 yes
 C(36)     C(37)     1.38(1)    1_555 1_555 yes
 C(37)     C(38)     1.380(10)  1_555 1_555 yes
 C(39)     C(40)     1.375(8)   1_555 1_555 yes
 C(39)     C(44)     1.366(8)   1_555 1_555 yes
 C(40)     C(41)     1.388(9)   1_555 1_555 yes
 C(41)     C(42)     1.35(1)    1_555 1_555 yes
 C(42)     C(43)     1.344(10)  1_555 1_555 yes
 C(43)     C(44)     1.387(9)   1_555 1_555 yes
 C(45)     C(46)     1.390(8)   1_555 1_555 yes
 C(45)     C(50)     1.379(8)   1_555 1_555 yes
 C(46)     C(47)     1.391(8)   1_555 1_555 yes
 C(47)     C(48)     1.382(10)  1_555 1_555 yes
 C(48)     C(49)     1.359(9)   1_555 1_555 yes
 C(49)     C(50)     1.378(8)   1_555 1_555 yes
 C(51)     C(52)     1.381(8)   1_555 1_555 yes
 C(51)     C(56)     1.375(8)   1_555 1_555 yes
 C(52)     C(53)     1.380(8)   1_555 1_555 yes
 C(53)     C(54)     1.367(10)  1_555 1_555 yes
 C(54)     C(55)     1.36(1)    1_555 1_555 yes
 C(55)     C(56)     1.378(9)   1_555 1_555 yes
#------------------------------------------------------------------------------
loop_
_geom_angle_atom_site_label_1
_geom_angle_atom_site_label_2
_geom_angle_atom_site_label_3
_geom_angle
_geom_angle_site_symmetry_1
_geom_angle_site_symmetry_2
_geom_angle_site_symmetry_3
_geom_angle_publ_flag
   Pd(2)     Pd(1)     Ru(1)     63.07(2)   1_555 1_555 1_555 yes
   Pd(2)     Pd(1)     Ru(2)     61.13(2)   1_555 1_555 1_555 yes
   Pd(2)     Pd(1)     Cl(1)     54.09(4)   1_555 1_555 1_555 yes
   Pd(2)     Pd(1)     S(1)      101.77(5)  1_555 1_555 1_555 yes
   Pd(2)     Pd(1)     P(1)      157.42(5)  1_555 1_555 1_555 yes
   Ru(1)     Pd(1)     Ru(2)     52.99(2)   1_555 1_555 1_555 yes
   Ru(1)     Pd(1)     Cl(1)     112.89(5)  1_555 1_555 1_555 yes
   Ru(1)     Pd(1)     S(1)      48.27(4)   1_555 1_555 1_555 yes
   Ru(1)     Pd(1)     P(1)      132.41(5)  1_555 1_555 1_555 yes
   Ru(2)     Pd(1)     Cl(1)     107.05(5)  1_555 1_555 1_555 yes
   Ru(2)     Pd(1)     S(1)      50.41(4)   1_555 1_555 1_555 yes
   Ru(2)     Pd(1)     P(1)      139.78(5)  1_555 1_555 1_555 yes
   Cl(1)     Pd(1)     S(1)      155.47(6)  1_555 1_555 1_555 yes
   Cl(1)     Pd(1)     P(1)      104.10(6)  1_555 1_555 1_555 yes
   S(1)      Pd(1)     P(1)      100.35(6)  1_555 1_555 1_555 yes
   Pd(1)     Pd(2)     Ru(1)     61.56(2)   1_555 1_555 1_555 yes
   Pd(1)     Pd(2)     Ru(2)     60.69(2)   1_555 1_555 1_555 yes
   Pd(1)     Pd(2)     Cl(1)     54.50(4)   1_555 1_555 1_555 yes
   Pd(1)     Pd(2)     S(2)      100.38(4)  1_555 1_555 1_555 yes
   Pd(1)     Pd(2)     P(2)      157.15(5)  1_555 1_555 1_555 yes
   Ru(1)     Pd(2)     Ru(2)     52.45(2)   1_555 1_555 1_555 yes
   Ru(1)     Pd(2)     Cl(1)     111.87(5)  1_555 1_555 1_555 yes
   Ru(1)     Pd(2)     S(2)      47.69(4)   1_555 1_555 1_555 yes
   Ru(1)     Pd(2)     P(2)      133.04(5)  1_555 1_555 1_555 yes
   Ru(2)     Pd(2)     Cl(1)     107.01(5)  1_555 1_555 1_555 yes
   Ru(2)     Pd(2)     S(2)      50.24(4)   1_555 1_555 1_555 yes
   Ru(2)     Pd(2)     P(2)      140.94(5)  1_555 1_555 1_555 yes
   Cl(1)     Pd(2)     S(2)      154.66(6)  1_555 1_555 1_555 yes
   Cl(1)     Pd(2)     P(2)      103.72(6)  1_555 1_555 1_555 yes
   S(2)      Pd(2)     P(2)      101.62(6)  1_555 1_555 1_555 yes
   Pd(1)     Ru(1)     Pd(2)     55.37(2)   1_555 1_555 1_555 yes
   Pd(1)     Ru(1)     Ru(2)     61.17(2)   1_555 1_555 1_555 yes
   Pd(1)     Ru(1)     S(1)      47.64(4)   1_555 1_555 1_555 yes
   Pd(1)     Ru(1)     S(2)      94.35(5)   1_555 1_555 1_555 yes
   Pd(1)     Ru(1)     C(1)      151.1(2)   1_555 1_555 1_555 yes
   Pd(1)     Ru(1)     C(2)      114.3(2)   1_555 1_555 1_555 yes
   Pd(1)     Ru(1)     C(3)      97.4(2)    1_555 1_555 1_555 yes
   Pd(1)     Ru(1)     C(4)      115.3(2)   1_555 1_555 1_555 yes
   Pd(1)     Ru(1)     C(5)      151.8(2)   1_555 1_555 1_555 yes
   Pd(2)     Ru(1)     Ru(2)     60.87(2)   1_555 1_555 1_555 yes
   Pd(2)     Ru(1)     S(1)      94.53(4)   1_555 1_555 1_555 yes
   Pd(2)     Ru(1)     S(2)      46.99(4)   1_555 1_555 1_555 yes
   Pd(2)     Ru(1)     C(1)      150.6(2)   1_555 1_555 1_555 yes
   Pd(2)     Ru(1)     C(2)      153.0(2)   1_555 1_555 1_555 yes
   Pd(2)     Ru(1)     C(3)      116.2(2)   1_555 1_555 1_555 yes
   Pd(2)     Ru(1)     C(4)      98.2(2)    1_555 1_555 1_555 yes
   Pd(2)     Ru(1)     C(5)      114.0(2)   1_555 1_555 1_555 yes
   Ru(2)     Ru(1)     S(1)      54.41(4)   1_555 1_555 1_555 yes
   Ru(2)     Ru(1)     S(2)      54.42(4)   1_555 1_555 1_555 yes
   Ru(2)     Ru(1)     C(1)      132.6(2)   1_555 1_555 1_555 yes
   Ru(2)     Ru(1)     C(2)      140.6(2)   1_555 1_555 1_555 yes
   Ru(2)     Ru(1)     C(3)      156.7(2)   1_555 1_555 1_555 yes
   Ru(2)     Ru(1)     C(4)      157.5(2)   1_555 1_555 1_555 yes
   Ru(2)     Ru(1)     C(5)      141.2(2)   1_555 1_555 1_555 yes
   S(1)      Ru(1)     S(2)      108.76(6)  1_555 1_555 1_555 yes
   S(1)      Ru(1)     C(1)      114.4(2)   1_555 1_555 1_555 yes
   S(1)      Ru(1)     C(2)      92.3(2)    1_555 1_555 1_555 yes
   S(1)      Ru(1)     C(3)      105.1(2)   1_555 1_555 1_555 yes
   S(1)      Ru(1)     C(4)      141.9(2)   1_555 1_555 1_555 yes
   S(1)      Ru(1)     C(5)      151.4(2)   1_555 1_555 1_555 yes
   S(2)      Ru(1)     C(1)      114.2(2)   1_555 1_555 1_555 yes
   S(2)      Ru(1)     C(2)      151.3(2)   1_555 1_555 1_555 yes
   S(2)      Ru(1)     C(3)      142.9(2)   1_555 1_555 1_555 yes
   S(2)      Ru(1)     C(4)      106.1(2)   1_555 1_555 1_555 yes
   S(2)      Ru(1)     C(5)      92.6(2)    1_555 1_555 1_555 yes
   C(1)      Ru(1)     C(2)      37.3(2)    1_555 1_555 1_555 yes
   C(1)      Ru(1)     C(3)      62.6(2)    1_555 1_555 1_555 yes
   C(1)      Ru(1)     C(4)      62.3(3)    1_555 1_555 1_555 yes
   C(1)      Ru(1)     C(5)      37.4(2)    1_555 1_555 1_555 yes
   C(2)      Ru(1)     C(3)      37.0(2)    1_555 1_555 1_555 yes
   C(2)      Ru(1)     C(4)      61.8(2)    1_555 1_555 1_555 yes
   C(2)      Ru(1)     C(5)      61.8(2)    1_555 1_555 1_555 yes
   C(3)      Ru(1)     C(4)      37.6(2)    1_555 1_555 1_555 yes
   C(3)      Ru(1)     C(5)      62.1(2)    1_555 1_555 1_555 yes
   C(4)      Ru(1)     C(5)      36.7(2)    1_555 1_555 1_555 yes
   Pd(1)     Ru(2)     Pd(2)     58.18(2)   1_555 1_555 1_555 yes
   Pd(1)     Ru(2)     Ru(1)     65.83(2)   1_555 1_555 1_555 yes
   Pd(1)     Ru(2)     S(1)      49.63(4)   1_555 1_555 1_555 yes
   Pd(1)     Ru(2)     S(2)      97.64(4)   1_555 1_555 1_555 yes
   Pd(1)     Ru(2)     C(11)     98.2(2)    1_555 1_555 1_555 yes
   Pd(1)     Ru(2)     C(12)     128.3(2)   1_555 1_555 1_555 yes
   Pd(1)     Ru(2)     C(13)     160.0(2)   1_555 1_555 1_555 yes
   Pd(1)     Ru(2)     C(14)     129.7(2)   1_555 1_555 1_555 yes
   Pd(1)     Ru(2)     C(15)     98.9(2)    1_555 1_555 1_555 yes
   Pd(2)     Ru(2)     Ru(1)     66.68(2)   1_555 1_555 1_555 yes
   Pd(2)     Ru(2)     S(1)      98.58(4)   1_555 1_555 1_555 yes
   Pd(2)     Ru(2)     S(2)      49.48(4)   1_555 1_555 1_555 yes
   Pd(2)     Ru(2)     C(11)     97.9(2)    1_555 1_555 1_555 yes
   Pd(2)     Ru(2)     C(12)     96.3(2)    1_555 1_555 1_555 yes
   Pd(2)     Ru(2)     C(13)     126.6(2)   1_555 1_555 1_555 yes
   Pd(2)     Ru(2)     C(14)     158.9(2)   1_555 1_555 1_555 yes
   Pd(2)     Ru(2)     C(15)     129.6(2)   1_555 1_555 1_555 yes
   Ru(1)     Ru(2)     S(1)      54.29(4)   1_555 1_555 1_555 yes
   Ru(1)     Ru(2)     S(2)      54.42(4)   1_555 1_555 1_555 yes
   Ru(1)     Ru(2)     C(11)     161.8(2)   1_555 1_555 1_555 yes
   Ru(1)     Ru(2)     C(12)     149.1(2)   1_555 1_555 1_555 yes
   Ru(1)     Ru(2)     C(13)     134.0(2)   1_555 1_555 1_555 yes
   Ru(1)     Ru(2)     C(14)     133.7(2)   1_555 1_555 1_555 yes
   Ru(1)     Ru(2)     C(15)     149.2(2)   1_555 1_555 1_555 yes
   S(1)      Ru(2)     S(2)      108.64(6)  1_555 1_555 1_555 yes
   S(1)      Ru(2)     C(11)     122.7(2)   1_555 1_555 1_555 yes
   S(1)      Ru(2)     C(12)     156.6(2)   1_555 1_555 1_555 yes
   S(1)      Ru(2)     C(13)     134.4(2)   1_555 1_555 1_555 yes
   S(1)      Ru(2)     C(14)     99.6(2)    1_555 1_555 1_555 yes
   S(1)      Ru(2)     C(15)     95.2(2)    1_555 1_555 1_555 yes
   S(2)      Ru(2)     C(11)     123.4(2)   1_555 1_555 1_555 yes
   S(2)      Ru(2)     C(12)     94.8(2)    1_555 1_555 1_555 yes
   S(2)      Ru(2)     C(13)     98.1(2)    1_555 1_555 1_555 yes
   S(2)      Ru(2)     C(14)     132.2(2)   1_555 1_555 1_555 yes
   S(2)      Ru(2)     C(15)     156.1(2)   1_555 1_555 1_555 yes
   C(11)     Ru(2)     C(12)     36.7(2)    1_555 1_555 1_555 yes
   C(11)     Ru(2)     C(13)     62.6(2)    1_555 1_555 1_555 yes
   C(11)     Ru(2)     C(14)     62.9(2)    1_555 1_555 1_555 yes
   C(11)     Ru(2)     C(15)     36.8(2)    1_555 1_555 1_555 yes
   C(12)     Ru(2)     C(13)     37.8(2)    1_555 1_555 1_555 yes
   C(12)     Ru(2)     C(14)     63.1(2)    1_555 1_555 1_555 yes
   C(12)     Ru(2)     C(15)     61.4(2)    1_555 1_555 1_555 yes
   C(13)     Ru(2)     C(14)     38.3(2)    1_555 1_555 1_555 yes
   C(13)     Ru(2)     C(15)     62.6(2)    1_555 1_555 1_555 yes
   C(14)     Ru(2)     C(15)     37.6(2)    1_555 1_555 1_555 yes
   Pd(1)     Cl(1)     Pd(2)     71.41(5)   1_555 1_555 1_555 yes
   Pd(1)     S(1)      Ru(1)     84.09(5)   1_555 1_555 1_555 yes
   Pd(1)     S(1)      Ru(2)     79.97(5)   1_555 1_555 1_555 yes
   Ru(1)     S(1)      Ru(2)     71.30(5)   1_555 1_555 1_555 yes
   Pd(2)     S(2)      Ru(1)     85.32(6)   1_555 1_555 1_555 yes
   Pd(2)     S(2)      Ru(2)     80.27(6)   1_555 1_555 1_555 yes
   Ru(1)     S(2)      Ru(2)     71.15(5)   1_555 1_555 1_555 yes
   Pd(1)     P(1)      C(39)     112.6(2)   1_555 1_555 1_555 yes
   Pd(1)     P(1)      C(45)     115.0(2)   1_555 1_555 1_555 yes
   Pd(1)     P(1)      C(51)     114.4(2)   1_555 1_555 1_555 yes
   C(39)     P(1)      C(45)     104.0(3)   1_555 1_555 1_555 yes
   C(39)     P(1)      C(51)     105.2(3)   1_555 1_555 1_555 yes
   C(45)     P(1)      C(51)     104.6(3)   1_555 1_555 1_555 yes
   Pd(2)     P(2)      C(21)     111.8(2)   1_555 1_555 1_555 yes
   Pd(2)     P(2)      C(27)     114.6(2)   1_555 1_555 1_555 yes
   Pd(2)     P(2)      C(33)     114.5(2)   1_555 1_555 1_555 yes
   C(21)     P(2)      C(27)     105.9(3)   1_555 1_555 1_555 yes
   C(21)     P(2)      C(33)     106.1(3)   1_555 1_555 1_555 yes
   C(27)     P(2)      C(33)     103.2(3)   1_555 1_555 1_555 yes
   Ru(1)     C(1)      C(2)      72.9(4)    1_555 1_555 1_555 yes
   Ru(1)     C(1)      C(5)      72.4(4)    1_555 1_555 1_555 yes
   Ru(1)     C(1)      C(6)      126.3(5)   1_555 1_555 1_555 yes
   C(2)      C(1)      C(5)      107.7(6)   1_555 1_555 1_555 yes
   C(2)      C(1)      C(6)      124.9(7)   1_555 1_555 1_555 yes
   C(5)      C(1)      C(6)      126.9(8)   1_555 1_555 1_555 yes
   Ru(1)     C(2)      C(1)      69.8(4)    1_555 1_555 1_555 yes
   Ru(1)     C(2)      C(3)      71.6(4)    1_555 1_555 1_555 yes
   Ru(1)     C(2)      C(7)      126.9(5)   1_555 1_555 1_555 yes
   C(1)      C(2)      C(3)      108.6(6)   1_555 1_555 1_555 yes
   C(1)      C(2)      C(7)      126.4(7)   1_555 1_555 1_555 yes
   C(3)      C(2)      C(7)      124.9(7)   1_555 1_555 1_555 yes
   Ru(1)     C(3)      C(2)      71.4(4)    1_555 1_555 1_555 yes
   Ru(1)     C(3)      C(4)      70.6(4)    1_555 1_555 1_555 yes
   Ru(1)     C(3)      C(8)      129.3(5)   1_555 1_555 1_555 yes
   C(2)      C(3)      C(4)      106.7(6)   1_555 1_555 1_555 yes
   C(2)      C(3)      C(8)      124.4(7)   1_555 1_555 1_555 yes
   C(4)      C(3)      C(8)      128.3(7)   1_555 1_555 1_555 yes
   Ru(1)     C(4)      C(3)      71.8(4)    1_555 1_555 1_555 yes
   Ru(1)     C(4)      C(5)      71.7(4)    1_555 1_555 1_555 yes
   Ru(1)     C(4)      C(9)      127.1(5)   1_555 1_555 1_555 yes
   C(3)      C(4)      C(5)      108.5(7)   1_555 1_555 1_555 yes
   C(3)      C(4)      C(9)      124.3(8)   1_555 1_555 1_555 yes
   C(5)      C(4)      C(9)      126.9(8)   1_555 1_555 1_555 yes
   Ru(1)     C(5)      C(1)      70.3(4)    1_555 1_555 1_555 yes
   Ru(1)     C(5)      C(4)      71.6(4)    1_555 1_555 1_555 yes
   Ru(1)     C(5)      C(10)     126.7(5)   1_555 1_555 1_555 yes
   C(1)      C(5)      C(4)      108.4(7)   1_555 1_555 1_555 yes
   C(1)      C(5)      C(10)     125.8(8)   1_555 1_555 1_555 yes
   C(4)      C(5)      C(10)     125.7(8)   1_555 1_555 1_555 yes
   C(1)      C(6)      H(1)      109.6(7)   1_555 1_555 1_555 no
   C(1)      C(6)      H(2)      109.4(7)   1_555 1_555 1_555 no
   C(1)      C(6)      H(3)      109.4(8)   1_555 1_555 1_555 no
   H(1)      C(6)      H(2)      109.5(9)   1_555 1_555 1_555 no
   H(1)      C(6)      H(3)      109.5(8)   1_555 1_555 1_555 no
   H(2)      C(6)      H(3)      109.4(8)   1_555 1_555 1_555 no
   C(2)      C(7)      H(4)      109.5(6)   1_555 1_555 1_555 no
   C(2)      C(7)      H(5)      109.5(7)   1_555 1_555 1_555 no
   C(2)      C(7)      H(6)      109.5(7)   1_555 1_555 1_555 no
   H(4)      C(7)      H(5)      109.4(8)   1_555 1_555 1_555 no
   H(4)      C(7)      H(6)      109.4(7)   1_555 1_555 1_555 no
   H(5)      C(7)      H(6)      109.5(7)   1_555 1_555 1_555 no
   C(3)      C(8)      H(7)      109.5(8)   1_555 1_555 1_555 no
   C(3)      C(8)      H(8)      109.5(7)   1_555 1_555 1_555 no
   C(3)      C(8)      H(9)      109.5(7)   1_555 1_555 1_555 no
   H(7)      C(8)      H(8)      109.4(7)   1_555 1_555 1_555 no
   H(7)      C(8)      H(9)      109.4(7)   1_555 1_555 1_555 no
   H(8)      C(8)      H(9)      109.4(9)   1_555 1_555 1_555 no
   C(4)      C(9)      H(10)     109.4(8)   1_555 1_555 1_555 no
   C(4)      C(9)      H(11)     109.4(7)   1_555 1_555 1_555 no
   C(4)      C(9)      H(12)     109.4(7)   1_555 1_555 1_555 no
   H(10)     C(9)      H(11)     109.5(8)   1_555 1_555 1_555 no
   H(10)     C(9)      H(12)     109.6(8)   1_555 1_555 1_555 no
   H(11)     C(9)      H(12)     109.5(9)   1_555 1_555 1_555 no
   C(5)      C(10)     H(13)     109.3(7)   1_555 1_555 1_555 no
   C(5)      C(10)     H(14)     109.5(9)   1_555 1_555 1_555 no
   C(5)      C(10)     H(15)     109.2(8)   1_555 1_555 1_555 no
   H(13)     C(10)     H(14)     109.7(9)   1_555 1_555 1_555 no
   H(13)     C(10)     H(15)     109.4(10)  1_555 1_555 1_555 no
   H(14)     C(10)     H(15)     109.7(8)   1_555 1_555 1_555 no
   Ru(2)     C(11)     C(12)     71.8(4)    1_555 1_555 1_555 yes
   Ru(2)     C(11)     C(15)     72.0(4)    1_555 1_555 1_555 yes
   Ru(2)     C(11)     C(16)     128.6(4)   1_555 1_555 1_555 yes
   C(12)     C(11)     C(15)     108.6(6)   1_555 1_555 1_555 yes
   C(12)     C(11)     C(16)     125.8(7)   1_555 1_555 1_555 yes
   C(15)     C(11)     C(16)     125.1(7)   1_555 1_555 1_555 yes
   Ru(2)     C(12)     C(11)     71.6(4)    1_555 1_555 1_555 yes
   Ru(2)     C(12)     C(13)     69.4(4)    1_555 1_555 1_555 yes
   Ru(2)     C(12)     C(17)     126.8(4)   1_555 1_555 1_555 yes
   C(11)     C(12)     C(13)     108.2(6)   1_555 1_555 1_555 yes
   C(11)     C(12)     C(17)     126.4(7)   1_555 1_555 1_555 yes
   C(13)     C(12)     C(17)     125.3(7)   1_555 1_555 1_555 yes
   Ru(2)     C(13)     C(12)     72.8(4)    1_555 1_555 1_555 yes
   Ru(2)     C(13)     C(14)     71.1(3)    1_555 1_555 1_555 yes
   Ru(2)     C(13)     C(18)     123.2(5)   1_555 1_555 1_555 yes
   C(12)     C(13)     C(14)     107.8(6)   1_555 1_555 1_555 yes
   C(12)     C(13)     C(18)     127.0(7)   1_555 1_555 1_555 yes
   C(14)     C(13)     C(18)     125.2(7)   1_555 1_555 1_555 yes
   Ru(2)     C(14)     C(13)     70.6(3)    1_555 1_555 1_555 yes
   Ru(2)     C(14)     C(15)     73.0(3)    1_555 1_555 1_555 yes
   Ru(2)     C(14)     C(19)     125.5(5)   1_555 1_555 1_555 yes
   C(13)     C(14)     C(15)     106.7(6)   1_555 1_555 1_555 yes
   C(13)     C(14)     C(19)     126.0(7)   1_555 1_555 1_555 yes
   C(15)     C(14)     C(19)     127.1(7)   1_555 1_555 1_555 yes
   Ru(2)     C(15)     C(11)     71.2(4)    1_555 1_555 1_555 yes
   Ru(2)     C(15)     C(14)     69.4(3)    1_555 1_555 1_555 yes
   Ru(2)     C(15)     C(20)     127.3(5)   1_555 1_555 1_555 yes
   C(11)     C(15)     C(14)     108.7(6)   1_555 1_555 1_555 yes
   C(11)     C(15)     C(20)     127.1(7)   1_555 1_555 1_555 yes
   C(14)     C(15)     C(20)     124.2(7)   1_555 1_555 1_555 yes
   C(11)     C(16)     H(16)     109.6(7)   1_555 1_555 1_555 no
   C(11)     C(16)     H(17)     109.5(6)   1_555 1_555 1_555 no
   C(11)     C(16)     H(18)     109.5(6)   1_555 1_555 1_555 no
   H(16)     C(16)     H(17)     109.5(6)   1_555 1_555 1_555 no
   H(16)     C(16)     H(18)     109.5(7)   1_555 1_555 1_555 no
   H(17)     C(16)     H(18)     109.3(7)   1_555 1_555 1_555 no
   C(12)     C(17)     H(19)     109.5(7)   1_555 1_555 1_555 no
   C(12)     C(17)     H(20)     109.5(6)   1_555 1_555 1_555 no
   C(12)     C(17)     H(21)     109.5(7)   1_555 1_555 1_555 no
   H(19)     C(17)     H(20)     109.4(7)   1_555 1_555 1_555 no
   H(19)     C(17)     H(21)     109.5(6)   1_555 1_555 1_555 no
   H(20)     C(17)     H(21)     109.4(7)   1_555 1_555 1_555 no
   C(13)     C(18)     H(22)     109.5(7)   1_555 1_555 1_555 no
   C(13)     C(18)     H(23)     109.5(6)   1_555 1_555 1_555 no
   C(13)     C(18)     H(24)     109.5(7)   1_555 1_555 1_555 no
   H(22)     C(18)     H(23)     109.4(8)   1_555 1_555 1_555 no
   H(22)     C(18)     H(24)     109.4(7)   1_555 1_555 1_555 no
   H(23)     C(18)     H(24)     109.4(8)   1_555 1_555 1_555 no
   C(14)     C(19)     H(25)     109.5(7)   1_555 1_555 1_555 no
   C(14)     C(19)     H(26)     109.5(7)   1_555 1_555 1_555 no
   C(14)     C(19)     H(27)     109.5(6)   1_555 1_555 1_555 no
   H(25)     C(19)     H(26)     109.4(7)   1_555 1_555 1_555 no
   H(25)     C(19)     H(27)     109.5(8)   1_555 1_555 1_555 no
   H(26)     C(19)     H(27)     109.4(7)   1_555 1_555 1_555 no
   C(15)     C(20)     H(28)     109.5(7)   1_555 1_555 1_555 no
   C(15)     C(20)     H(29)     109.5(6)   1_555 1_555 1_555 no
   C(15)     C(20)     H(30)     109.5(7)   1_555 1_555 1_555 no
   H(28)     C(20)     H(29)     109.5(7)   1_555 1_555 1_555 no
   H(28)     C(20)     H(30)     109.5(7)   1_555 1_555 1_555 no
   H(29)     C(20)     H(30)     109.5(7)   1_555 1_555 1_555 no
   P(2)      C(21)     C(22)     119.4(5)   1_555 1_555 1_555 yes
   P(2)      C(21)     C(26)     122.4(5)   1_555 1_555 1_555 yes
   C(22)     C(21)     C(26)     117.8(6)   1_555 1_555 1_555 yes
   C(21)     C(22)     C(23)     121.4(7)   1_555 1_555 1_555 yes
   C(21)     C(22)     H(31)     119.3(7)   1_555 1_555 1_555 no
   C(23)     C(22)     H(31)     119.3(8)   1_555 1_555 1_555 no
   C(22)     C(23)     C(24)     120.0(7)   1_555 1_555 1_555 yes
   C(22)     C(23)     H(32)     119.9(9)   1_555 1_555 1_555 no
   C(24)     C(23)     H(32)     120.0(9)   1_555 1_555 1_555 no
   C(23)     C(24)     C(25)     119.7(8)   1_555 1_555 1_555 yes
   C(23)     C(24)     H(33)     120.1(10)  1_555 1_555 1_555 no
   C(25)     C(24)     H(33)     120(1)     1_555 1_555 1_555 no
   C(24)     C(25)     C(26)     121.1(8)   1_555 1_555 1_555 yes
   C(24)     C(25)     H(34)     119.4(9)   1_555 1_555 1_555 no
   C(26)     C(25)     H(34)     119.5(9)   1_555 1_555 1_555 no
   C(21)     C(26)     C(25)     120.0(7)   1_555 1_555 1_555 yes
   C(21)     C(26)     H(35)     120.0(7)   1_555 1_555 1_555 no
   C(25)     C(26)     H(35)     120.0(8)   1_555 1_555 1_555 no
   P(2)      C(27)     C(28)     122.9(5)   1_555 1_555 1_555 yes
   P(2)      C(27)     C(32)     118.4(5)   1_555 1_555 1_555 yes
   C(28)     C(27)     C(32)     118.7(6)   1_555 1_555 1_555 yes
   C(27)     C(28)     C(29)     119.9(6)   1_555 1_555 1_555 yes
   C(27)     C(28)     H(36)     120.0(6)   1_555 1_555 1_555 no
   C(29)     C(28)     H(36)     120.1(6)   1_555 1_555 1_555 no
   C(28)     C(29)     C(30)     120.8(6)   1_555 1_555 1_555 yes
   C(28)     C(29)     H(37)     119.6(7)   1_555 1_555 1_555 no
   C(30)     C(29)     H(37)     119.6(7)   1_555 1_555 1_555 no
   C(29)     C(30)     C(31)     120.2(6)   1_555 1_555 1_555 yes
   C(29)     C(30)     H(38)     119.9(8)   1_555 1_555 1_555 no
   C(31)     C(30)     H(38)     119.9(8)   1_555 1_555 1_555 no
   C(30)     C(31)     C(32)     120.0(7)   1_555 1_555 1_555 yes
   C(30)     C(31)     H(39)     119.9(7)   1_555 1_555 1_555 no
   C(32)     C(31)     H(39)     120.0(8)   1_555 1_555 1_555 no
   C(27)     C(32)     C(31)     120.4(6)   1_555 1_555 1_555 yes
   C(27)     C(32)     H(40)     119.8(7)   1_555 1_555 1_555 no
   C(31)     C(32)     H(40)     119.8(7)   1_555 1_555 1_555 no
   P(2)      C(33)     C(34)     123.0(6)   1_555 1_555 1_555 yes
   P(2)      C(33)     C(38)     118.0(6)   1_555 1_555 1_555 yes
   C(34)     C(33)     C(38)     119.0(7)   1_555 1_555 1_555 yes
   C(33)     C(34)     C(35)     119.7(8)   1_555 1_555 1_555 yes
   C(33)     C(34)     H(41)     120.2(8)   1_555 1_555 1_555 no
   C(35)     C(34)     H(41)     120.1(8)   1_555 1_555 1_555 no
   C(34)     C(35)     C(36)     121.0(8)   1_555 1_555 1_555 yes
   C(34)     C(35)     H(42)     119.5(10)  1_555 1_555 1_555 no
   C(36)     C(35)     H(42)     119.5(10)  1_555 1_555 1_555 no
   C(35)     C(36)     C(37)     119.7(9)   1_555 1_555 1_555 yes
   C(35)     C(36)     H(43)     120(1)     1_555 1_555 1_555 no
   C(37)     C(36)     H(43)     120(1)     1_555 1_555 1_555 no
   C(36)     C(37)     C(38)     119.9(9)   1_555 1_555 1_555 yes
   C(36)     C(37)     H(44)     119(1)     1_555 1_555 1_555 no
   C(38)     C(37)     H(44)     120.1(10)  1_555 1_555 1_555 no
   C(33)     C(38)     C(37)     120.7(8)   1_555 1_555 1_555 yes
   C(33)     C(38)     H(45)     119.7(8)   1_555 1_555 1_555 no
   C(37)     C(38)     H(45)     119.6(8)   1_555 1_555 1_555 no
   P(1)      C(39)     C(40)     118.1(5)   1_555 1_555 1_555 yes
   P(1)      C(39)     C(44)     123.6(5)   1_555 1_555 1_555 yes
   C(40)     C(39)     C(44)     118.3(6)   1_555 1_555 1_555 yes
   C(39)     C(40)     C(41)     119.4(7)   1_555 1_555 1_555 yes
   C(39)     C(40)     H(46)     120.3(7)   1_555 1_555 1_555 no
   C(41)     C(40)     H(46)     120.3(8)   1_555 1_555 1_555 no
   C(40)     C(41)     C(42)     121.4(8)   1_555 1_555 1_555 yes
   C(40)     C(41)     H(47)     119.4(10)  1_555 1_555 1_555 no
   C(42)     C(41)     H(47)     119.3(9)   1_555 1_555 1_555 no
   C(41)     C(42)     C(43)     119.8(8)   1_555 1_555 1_555 yes
   C(41)     C(42)     H(48)     120(1)     1_555 1_555 1_555 no
   C(43)     C(42)     H(48)     120.0(10)  1_555 1_555 1_555 no
   C(42)     C(43)     C(44)     119.9(8)   1_555 1_555 1_555 yes
   C(42)     C(43)     H(49)     120.1(9)   1_555 1_555 1_555 no
   C(44)     C(43)     H(49)     120.0(9)   1_555 1_555 1_555 no
   C(39)     C(44)     C(43)     121.2(7)   1_555 1_555 1_555 yes
   C(39)     C(44)     H(50)     119.4(7)   1_555 1_555 1_555 no
   C(43)     C(44)     H(50)     119.4(8)   1_555 1_555 1_555 no
   P(1)      C(45)     C(46)     118.7(5)   1_555 1_555 1_555 yes
   P(1)      C(45)     C(50)     122.6(5)   1_555 1_555 1_555 yes
   C(46)     C(45)     C(50)     118.3(6)   1_555 1_555 1_555 yes
   C(45)     C(46)     C(47)     120.3(6)   1_555 1_555 1_555 yes
   C(45)     C(46)     H(51)     119.8(6)   1_555 1_555 1_555 no
   C(47)     C(46)     H(51)     119.8(7)   1_555 1_555 1_555 no
   C(46)     C(47)     C(48)     119.8(7)   1_555 1_555 1_555 yes
   C(46)     C(47)     H(52)     120.1(9)   1_555 1_555 1_555 no
   C(48)     C(47)     H(52)     120.1(8)   1_555 1_555 1_555 no
   C(47)     C(48)     C(49)     119.8(7)   1_555 1_555 1_555 yes
   C(47)     C(48)     H(53)     120.0(9)   1_555 1_555 1_555 no
   C(49)     C(48)     H(53)     120.1(9)   1_555 1_555 1_555 no
   C(48)     C(49)     C(50)     120.5(8)   1_555 1_555 1_555 yes
   C(48)     C(49)     H(54)     119.7(8)   1_555 1_555 1_555 no
   C(50)     C(49)     H(54)     119.8(8)   1_555 1_555 1_555 no
   C(45)     C(50)     C(49)     121.2(7)   1_555 1_555 1_555 yes
   C(45)     C(50)     H(55)     119.4(6)   1_555 1_555 1_555 no
   C(49)     C(50)     H(55)     119.4(7)   1_555 1_555 1_555 no
   P(1)      C(51)     C(52)     123.5(5)   1_555 1_555 1_555 yes
   P(1)      C(51)     C(56)     118.6(5)   1_555 1_555 1_555 yes
   C(52)     C(51)     C(56)     117.9(6)   1_555 1_555 1_555 yes
   C(51)     C(52)     C(53)     121.1(7)   1_555 1_555 1_555 yes
   C(51)     C(52)     H(56)     119.5(7)   1_555 1_555 1_555 no
   C(53)     C(52)     H(56)     119.5(7)   1_555 1_555 1_555 no
   C(52)     C(53)     C(54)     119.5(7)   1_555 1_555 1_555 yes
   C(52)     C(53)     H(57)     120.3(8)   1_555 1_555 1_555 no
   C(54)     C(53)     H(57)     120.2(8)   1_555 1_555 1_555 no
   C(53)     C(54)     C(55)     120.4(7)   1_555 1_555 1_555 yes
   C(53)     C(54)     H(58)     119.9(10)  1_555 1_555 1_555 no
   C(55)     C(54)     H(58)     119.7(10)  1_555 1_555 1_555 no
   C(54)     C(55)     C(56)     119.6(8)   1_555 1_555 1_555 yes
   C(54)     C(55)     H(59)     120.2(8)   1_555 1_555 1_555 no
   C(56)     C(55)     H(59)     120.2(9)   1_555 1_555 1_555 no
   C(51)     C(56)     C(55)     121.3(7)   1_555 1_555 1_555 yes
   C(51)     C(56)     H(60)     119.4(7)   1_555 1_555 1_555 no
   C(55)     C(56)     H(60)     119.3(8)   1_555 1_555 1_555 no
#------------------------------------------------------------------------------
loop_
_geom_torsion_atom_site_label_1
_geom_torsion_atom_site_label_2
_geom_torsion_atom_site_label_3
_geom_torsion_atom_site_label_4
_geom_torsion
_geom_torsion_site_symmetry_1
_geom_torsion_site_symmetry_2
_geom_torsion_site_symmetry_3
_geom_torsion_site_symmetry_4
_geom_torsion_publ_flag
   Pd(1)   Pd(2)   Ru(1)   Ru(2)   -73.38(2) 1_555 1_555 1_555 1_555 yes
   Pd(1)   Pd(2)   Ru(1)   S(1)    -28.82(4) 1_555 1_555 1_555 1_555 yes
   Pd(1)   Pd(2)   Ru(1)   S(2)    -140.37(6) 1_555 1_555 1_555 1_555 yes
   Pd(1)   Pd(2)   Ru(1)   C(1)    160.5(4) 1_555 1_555 1_555 1_555 yes
   Pd(1)   Pd(2)   Ru(1)   C(2)    75.3(4)  1_555 1_555 1_555 1_555 yes
   Pd(1)   Pd(2)   Ru(1)   C(3)    80.5(2)  1_555 1_555 1_555 1_555 yes
   Pd(1)   Pd(2)   Ru(1)   C(4)    115.2(2) 1_555 1_555 1_555 1_555 yes
   Pd(1)   Pd(2)   Ru(1)   C(5)    149.9(2) 1_555 1_555 1_555 1_555 yes
   Pd(1)   Pd(2)   Ru(2)   Ru(1)   75.10(2) 1_555 1_555 1_555 1_555 yes
   Pd(1)   Pd(2)   Ru(2)   S(1)    30.16(5) 1_555 1_555 1_555 1_555 yes
   Pd(1)   Pd(2)   Ru(2)   S(2)    137.39(6) 1_555 1_555 1_555 1_555 yes
   Pd(1)   Pd(2)   Ru(2)   C(11)   -94.8(2) 1_555 1_555 1_555 1_555 yes
   Pd(1)   Pd(2)   Ru(2)   C(12)   -131.7(2) 1_555 1_555 1_555 1_555 yes
   Pd(1)   Pd(2)   Ru(2)   C(13)   -156.5(2) 1_555 1_555 1_555 1_555 yes
   Pd(1)   Pd(2)   Ru(2)   C(14)   -118.7(5) 1_555 1_555 1_555 1_555 yes
   Pd(1)   Pd(2)   Ru(2)   C(15)   -73.9(2) 1_555 1_555 1_555 1_555 yes
   Pd(1)   Pd(2)   S(2)    Ru(1)   34.77(5) 1_555 1_555 1_555 1_555 yes
   Pd(1)   Pd(2)   S(2)    Ru(2)   -36.88(5) 1_555 1_555 1_555 1_555 yes
   Pd(1)   Pd(2)   P(2)    C(21)   -136.0(2) 1_555 1_555 1_555 1_555 yes
   Pd(1)   Pd(2)   P(2)    C(27)   -15.6(3) 1_555 1_555 1_555 1_555 yes
   Pd(1)   Pd(2)   P(2)    C(33)   103.4(3) 1_555 1_555 1_555 1_555 yes
   Pd(1)   Ru(1)   Pd(2)   Ru(2)   73.38(2) 1_555 1_555 1_555 1_555 yes
   Pd(1)   Ru(1)   Pd(2)   Cl(1)   -21.72(6) 1_555 1_555 1_555 1_555 yes
   Pd(1)   Ru(1)   Pd(2)   S(2)    140.37(6) 1_555 1_555 1_555 1_555 yes
   Pd(1)   Ru(1)   Pd(2)   P(2)    -158.15(6) 1_555 1_555 1_555 1_555 yes
   Pd(1)   Ru(1)   Ru(2)   Pd(2)   -64.16(2) 1_555 1_555 1_555 1_555 yes
   Pd(1)   Ru(1)   Ru(2)   S(1)    56.51(5) 1_555 1_555 1_555 1_555 yes
   Pd(1)   Ru(1)   Ru(2)   S(2)    -120.00(5) 1_555 1_555 1_555 1_555 yes
   Pd(1)   Ru(1)   Ru(2)   C(11)   -30.4(6) 1_555 1_555 1_555 1_555 yes
   Pd(1)   Ru(1)   Ru(2)   C(12)   -125.0(3) 1_555 1_555 1_555 1_555 yes
   Pd(1)   Ru(1)   Ru(2)   C(13)   176.8(3) 1_555 1_555 1_555 1_555 yes
   Pd(1)   Ru(1)   Ru(2)   C(14)   122.7(3) 1_555 1_555 1_555 1_555 yes
   Pd(1)   Ru(1)   Ru(2)   C(15)   65.1(3)  1_555 1_555 1_555 1_555 yes
   Pd(1)   Ru(1)   S(1)    Ru(2)   -81.38(5) 1_555 1_555 1_555 1_555 yes
   Pd(1)   Ru(1)   S(2)    Pd(2)   -31.76(4) 1_555 1_555 1_555 1_555 yes
   Pd(1)   Ru(1)   S(2)    Ru(2)   49.54(4) 1_555 1_555 1_555 1_555 yes
   Pd(1)   Ru(1)   C(1)    C(2)    13.7(7)  1_555 1_555 1_555 1_555 yes
   Pd(1)   Ru(1)   C(1)    C(5)    129.3(5) 1_555 1_555 1_555 1_555 yes
   Pd(1)   Ru(1)   C(1)    C(6)    -107.5(7) 1_555 1_555 1_555 1_555 yes
   Pd(1)   Ru(1)   C(2)    C(1)    -172.8(4) 1_555 1_555 1_555 1_555 yes
   Pd(1)   Ru(1)   C(2)    C(3)    68.5(4)  1_555 1_555 1_555 1_555 yes
   Pd(1)   Ru(1)   C(2)    C(7)    -51.8(7) 1_555 1_555 1_555 1_555 yes
   Pd(1)   Ru(1)   C(3)    C(2)    -121.2(4) 1_555 1_555 1_555 1_555 yes
   Pd(1)   Ru(1)   C(3)    C(4)    122.6(4) 1_555 1_555 1_555 1_555 yes
   Pd(1)   Ru(1)   C(3)    C(8)    -1.5(7)  1_555 1_555 1_555 1_555 yes
   Pd(1)   Ru(1)   C(4)    C(3)    -67.5(4) 1_555 1_555 1_555 1_555 yes
   Pd(1)   Ru(1)   C(4)    C(5)    175.1(4) 1_555 1_555 1_555 1_555 yes
   Pd(1)   Ru(1)   C(4)    C(9)    52.2(8)  1_555 1_555 1_555 1_555 yes
   Pd(1)   Ru(1)   C(5)    C(1)    -127.6(5) 1_555 1_555 1_555 1_555 yes
   Pd(1)   Ru(1)   C(5)    C(4)    -9.4(7)  1_555 1_555 1_555 1_555 yes
   Pd(1)   Ru(1)   C(5)    C(10)   111.9(8) 1_555 1_555 1_555 1_555 yes
   Pd(1)   Ru(2)   Pd(2)   Ru(1)   -75.10(2) 1_555 1_555 1_555 1_555 yes
   Pd(1)   Ru(2)   Pd(2)   Cl(1)   29.75(5) 1_555 1_555 1_555 1_555 yes
   Pd(1)   Ru(2)   Pd(2)   S(2)    -137.39(6) 1_555 1_555 1_555 1_555 yes
   Pd(1)   Ru(2)   Pd(2)   P(2)    170.14(8) 1_555 1_555 1_555 1_555 yes
   Pd(1)   Ru(2)   Ru(1)   Pd(2)   64.16(2) 1_555 1_555 1_555 1_555 yes
   Pd(1)   Ru(2)   Ru(1)   S(1)    -56.51(5) 1_555 1_555 1_555 1_555 yes
   Pd(1)   Ru(2)   Ru(1)   S(2)    120.00(5) 1_555 1_555 1_555 1_555 yes
   Pd(1)   Ru(2)   Ru(1)   C(1)    -148.4(3) 1_555 1_555 1_555 1_555 yes
   Pd(1)   Ru(2)   Ru(1)   C(2)    -94.0(3) 1_555 1_555 1_555 1_555 yes
   Pd(1)   Ru(2)   Ru(1)   C(3)    -24.8(5) 1_555 1_555 1_555 1_555 yes
   Pd(1)   Ru(2)   Ru(1)   C(4)    86.9(6)  1_555 1_555 1_555 1_555 yes
   Pd(1)   Ru(2)   Ru(1)   C(5)    157.1(3) 1_555 1_555 1_555 1_555 yes
   Pd(1)   Ru(2)   S(1)    Ru(1)   87.10(5) 1_555 1_555 1_555 1_555 yes
   Pd(1)   Ru(2)   S(2)    Pd(2)   35.48(4) 1_555 1_555 1_555 1_555 yes
   Pd(1)   Ru(2)   S(2)    Ru(1)   -52.86(4) 1_555 1_555 1_555 1_555 yes
   Pd(1)   Ru(2)   C(11)   C(12)   -148.7(4) 1_555 1_555 1_555 1_555 yes
   Pd(1)   Ru(2)   C(11)   C(15)   93.9(4)  1_555 1_555 1_555 1_555 yes
   Pd(1)   Ru(2)   C(11)   C(16)   -27.1(7) 1_555 1_555 1_555 1_555 yes
   Pd(1)   Ru(2)   C(12)   C(11)   40.9(4)  1_555 1_555 1_555 1_555 yes
   Pd(1)   Ru(2)   C(12)   C(13)   159.4(3) 1_555 1_555 1_555 1_555 yes
   Pd(1)   Ru(2)   C(12)   C(17)   -81.3(7) 1_555 1_555 1_555 1_555 yes
   Pd(1)   Ru(2)   C(13)   C(12)   -54.1(8) 1_555 1_555 1_555 1_555 yes
   Pd(1)   Ru(2)   C(13)   C(14)   62.3(7)  1_555 1_555 1_555 1_555 yes
   Pd(1)   Ru(2)   C(13)   C(18)   -177.5(4) 1_555 1_555 1_555 1_555 yes
   Pd(1)   Ru(2)   C(14)   C(13)   -156.8(3) 1_555 1_555 1_555 1_555 yes
   Pd(1)   Ru(2)   C(14)   C(15)   -41.6(5) 1_555 1_555 1_555 1_555 yes
   Pd(1)   Ru(2)   C(14)   C(19)   82.2(6)  1_555 1_555 1_555 1_555 yes
   Pd(1)   Ru(2)   C(15)   C(11)   -91.8(4) 1_555 1_555 1_555 1_555 yes
   Pd(1)   Ru(2)   C(15)   C(14)   148.9(4) 1_555 1_555 1_555 1_555 yes
   Pd(1)   Ru(2)   C(15)   C(20)   30.9(6)  1_555 1_555 1_555 1_555 yes
   Pd(1)   Cl(1)   Pd(2)   Ru(1)   23.56(6) 1_555 1_555 1_555 1_555 yes
   Pd(1)   Cl(1)   Pd(2)   Ru(2)   -32.10(5) 1_555 1_555 1_555 1_555 yes
   Pd(1)   Cl(1)   Pd(2)   S(2)    -8.5(2)  1_555 1_555 1_555 1_555 yes
   Pd(1)   Cl(1)   Pd(2)   P(2)    172.33(5) 1_555 1_555 1_555 1_555 yes
   Pd(1)   S(1)    Ru(1)   Pd(2)   32.47(4) 1_555 1_555 1_555 1_555 yes
   Pd(1)   S(1)    Ru(1)   Ru(2)   81.38(5) 1_555 1_555 1_555 1_555 yes
   Pd(1)   S(1)    Ru(1)   S(2)    78.38(6) 1_555 1_555 1_555 1_555 yes
   Pd(1)   S(1)    Ru(1)   C(1)    -152.5(2) 1_555 1_555 1_555 1_555 yes
   Pd(1)   S(1)    Ru(1)   C(2)    -121.4(2) 1_555 1_555 1_555 1_555 yes
   Pd(1)   S(1)    Ru(1)   C(3)    -86.2(2) 1_555 1_555 1_555 1_555 yes
   Pd(1)   S(1)    Ru(1)   C(4)    -76.9(3) 1_555 1_555 1_555 1_555 yes
   Pd(1)   S(1)    Ru(1)   C(5)    -145.1(4) 1_555 1_555 1_555 1_555 yes
   Pd(1)   S(1)    Ru(2)   Pd(2)   -34.08(5) 1_555 1_555 1_555 1_555 yes
   Pd(1)   S(1)    Ru(2)   Ru(1)   -87.10(5) 1_555 1_555 1_555 1_555 yes
   Pd(1)   S(1)    Ru(2)   S(2)    -84.10(6) 1_555 1_555 1_555 1_555 yes
   Pd(1)   S(1)    Ru(2)   C(11)   71.2(2)  1_555 1_555 1_555 1_555 yes
   Pd(1)   S(1)    Ru(2)   C(12)   94.8(5)  1_555 1_555 1_555 1_555 yes
   Pd(1)   S(1)    Ru(2)   C(13)   153.4(3) 1_555 1_555 1_555 1_555 yes
   Pd(1)   S(1)    Ru(2)   C(14)   135.0(2) 1_555 1_555 1_555 1_555 yes
   Pd(1)   S(1)    Ru(2)   C(15)   97.3(2)  1_555 1_555 1_555 1_555 yes
   Pd(1)   P(1)    C(39)   C(40)   31.0(6)  1_555 1_555 1_555 1_555 yes
   Pd(1)   P(1)    C(39)   C(44)   -149.4(5) 1_555 1_555 1_555 1_555 yes
   Pd(1)   P(1)    C(45)   C(46)   66.2(5)  1_555 1_555 1_555 1_555 yes
   Pd(1)   P(1)    C(45)   C(50)   -106.5(5) 1_555 1_555 1_555 1_555 yes
   Pd(1)   P(1)    C(51)   C(52)   -162.0(5) 1_555 1_555 1_555 1_555 yes
   Pd(1)   P(1)    C(51)   C(56)   20.4(6)  1_555 1_555 1_555 1_555 yes
   Pd(2)   Pd(1)   Ru(1)   Ru(2)   72.83(2) 1_555 1_555 1_555 1_555 yes
   Pd(2)   Pd(1)   Ru(1)   S(1)    139.43(6) 1_555 1_555 1_555 1_555 yes
   Pd(2)   Pd(1)   Ru(1)   S(2)    27.89(4) 1_555 1_555 1_555 1_555 yes
   Pd(2)   Pd(1)   Ru(1)   C(1)    -160.2(4) 1_555 1_555 1_555 1_555 yes
   Pd(2)   Pd(1)   Ru(1)   C(2)    -151.2(2) 1_555 1_555 1_555 1_555 yes
   Pd(2)   Pd(1)   Ru(1)   C(3)    -116.8(2) 1_555 1_555 1_555 1_555 yes
   Pd(2)   Pd(1)   Ru(1)   C(4)    -82.2(2) 1_555 1_555 1_555 1_555 yes
   Pd(2)   Pd(1)   Ru(1)   C(5)    -76.0(4) 1_555 1_555 1_555 1_555 yes
   Pd(2)   Pd(1)   Ru(2)   Ru(1)   -76.57(2) 1_555 1_555 1_555 1_555 yes
   Pd(2)   Pd(1)   Ru(2)   S(1)    -139.30(6) 1_555 1_555 1_555 1_555 yes
   Pd(2)   Pd(1)   Ru(2)   S(2)    -31.28(4) 1_555 1_555 1_555 1_555 yes
   Pd(2)   Pd(1)   Ru(2)   C(11)   94.2(2)  1_555 1_555 1_555 1_555 yes
   Pd(2)   Pd(1)   Ru(2)   C(12)   71.0(2)  1_555 1_555 1_555 1_555 yes
   Pd(2)   Pd(1)   Ru(2)   C(13)   110.2(5) 1_555 1_555 1_555 1_555 yes
   Pd(2)   Pd(1)   Ru(2)   C(14)   155.7(2) 1_555 1_555 1_555 1_555 yes
   Pd(2)   Pd(1)   Ru(2)   C(15)   131.5(2) 1_555 1_555 1_555 1_555 yes
   Pd(2)   Pd(1)   S(1)    Ru(1)   -36.32(5) 1_555 1_555 1_555 1_555 yes
   Pd(2)   Pd(1)   S(1)    Ru(2)   35.68(5) 1_555 1_555 1_555 1_555 yes
   Pd(2)   Pd(1)   P(1)    C(39)   -85.7(2) 1_555 1_555 1_555 1_555 yes
   Pd(2)   Pd(1)   P(1)    C(45)   155.4(2) 1_555 1_555 1_555 1_555 yes
   Pd(2)   Pd(1)   P(1)    C(51)   34.4(3)  1_555 1_555 1_555 1_555 yes
   Pd(2)   Ru(1)   Pd(1)   Ru(2)   -72.83(2) 1_555 1_555 1_555 1_555 yes
   Pd(2)   Ru(1)   Pd(1)   Cl(1)   21.77(6) 1_555 1_555 1_555 1_555 yes
   Pd(2)   Ru(1)   Pd(1)   S(1)    -139.43(6) 1_555 1_555 1_555 1_555 yes
   Pd(2)   Ru(1)   Pd(1)   P(1)    159.82(6) 1_555 1_555 1_555 1_555 yes
   Pd(2)   Ru(1)   Ru(2)   S(1)    120.66(5) 1_555 1_555 1_555 1_555 yes
   Pd(2)   Ru(1)   Ru(2)   S(2)    -55.84(5) 1_555 1_555 1_555 1_555 yes
   Pd(2)   Ru(1)   Ru(2)   C(11)   33.8(6)  1_555 1_555 1_555 1_555 yes
   Pd(2)   Ru(1)   Ru(2)   C(12)   -60.8(3) 1_555 1_555 1_555 1_555 yes
   Pd(2)   Ru(1)   Ru(2)   C(13)   -119.1(3) 1_555 1_555 1_555 1_555 yes
   Pd(2)   Ru(1)   Ru(2)   C(14)   -173.2(3) 1_555 1_555 1_555 1_555 yes
   Pd(2)   Ru(1)   Ru(2)   C(15)   129.3(3) 1_555 1_555 1_555 1_555 yes
   Pd(2)   Ru(1)   S(1)    Ru(2)   -48.92(4) 1_555 1_555 1_555 1_555 yes
   Pd(2)   Ru(1)   S(2)    Ru(2)   81.30(5) 1_555 1_555 1_555 1_555 yes
   Pd(2)   Ru(1)   C(1)    C(2)    -131.7(4) 1_555 1_555 1_555 1_555 yes
   Pd(2)   Ru(1)   C(1)    C(5)    -16.1(7) 1_555 1_555 1_555 1_555 yes
   Pd(2)   Ru(1)   C(1)    C(6)    107.2(7) 1_555 1_555 1_555 1_555 yes
   Pd(2)   Ru(1)   C(2)    C(1)    126.3(4) 1_555 1_555 1_555 1_555 yes
   Pd(2)   Ru(1)   C(2)    C(3)    7.6(7)   1_555 1_555 1_555 1_555 yes
   Pd(2)   Ru(1)   C(2)    C(7)    -112.7(6) 1_555 1_555 1_555 1_555 yes
   Pd(2)   Ru(1)   C(3)    C(2)    -176.1(4) 1_555 1_555 1_555 1_555 yes
   Pd(2)   Ru(1)   C(3)    C(4)    67.7(4)  1_555 1_555 1_555 1_555 yes
   Pd(2)   Ru(1)   C(3)    C(8)    -56.4(8) 1_555 1_555 1_555 1_555 yes
   Pd(2)   Ru(1)   C(4)    C(3)    -123.0(4) 1_555 1_555 1_555 1_555 yes
   Pd(2)   Ru(1)   C(4)    C(5)    119.7(4) 1_555 1_555 1_555 1_555 yes
   Pd(2)   Ru(1)   C(4)    C(9)    -3.2(8)  1_555 1_555 1_555 1_555 yes
   Pd(2)   Ru(1)   C(5)    C(1)    171.4(4) 1_555 1_555 1_555 1_555 yes
   Pd(2)   Ru(1)   C(5)    C(4)    -70.3(4) 1_555 1_555 1_555 1_555 yes
   Pd(2)   Ru(1)   C(5)    C(10)   50.9(8)  1_555 1_555 1_555 1_555 yes
   Pd(2)   Ru(2)   Pd(1)   Ru(1)   76.57(2) 1_555 1_555 1_555 1_555 yes
   Pd(2)   Ru(2)   Pd(1)   Cl(1)   -29.59(5) 1_555 1_555 1_555 1_555 yes
   Pd(2)   Ru(2)   Pd(1)   S(1)    139.30(6) 1_555 1_555 1_555 1_555 yes
   Pd(2)   Ru(2)   Pd(1)   P(1)    -168.80(8) 1_555 1_555 1_555 1_555 yes
   Pd(2)   Ru(2)   Ru(1)   S(1)    -120.66(5) 1_555 1_555 1_555 1_555 yes
   Pd(2)   Ru(2)   Ru(1)   S(2)    55.84(5) 1_555 1_555 1_555 1_555 yes
   Pd(2)   Ru(2)   Ru(1)   C(1)    147.4(3) 1_555 1_555 1_555 1_555 yes
   Pd(2)   Ru(2)   Ru(1)   C(2)    -158.2(3) 1_555 1_555 1_555 1_555 yes
   Pd(2)   Ru(2)   Ru(1)   C(3)    -89.0(5) 1_555 1_555 1_555 1_555 yes
   Pd(2)   Ru(2)   Ru(1)   C(4)    22.8(6)  1_555 1_555 1_555 1_555 yes
   Pd(2)   Ru(2)   Ru(1)   C(5)    92.9(3)  1_555 1_555 1_555 1_555 yes
   Pd(2)   Ru(2)   S(1)    Ru(1)   53.02(4) 1_555 1_555 1_555 1_555 yes
   Pd(2)   Ru(2)   S(2)    Ru(1)   -88.34(5) 1_555 1_555 1_555 1_555 yes
   Pd(2)   Ru(2)   C(11)   C(12)   -89.9(4) 1_555 1_555 1_555 1_555 yes
   Pd(2)   Ru(2)   C(11)   C(15)   152.7(4) 1_555 1_555 1_555 1_555 yes
   Pd(2)   Ru(2)   C(11)   C(16)   31.8(7)  1_555 1_555 1_555 1_555 yes
   Pd(2)   Ru(2)   C(12)   C(11)   94.8(4)  1_555 1_555 1_555 1_555 yes
   Pd(2)   Ru(2)   C(12)   C(13)   -146.7(4) 1_555 1_555 1_555 1_555 yes
   Pd(2)   Ru(2)   C(12)   C(17)   -27.4(6) 1_555 1_555 1_555 1_555 yes
   Pd(2)   Ru(2)   C(13)   C(12)   42.8(5)  1_555 1_555 1_555 1_555 yes
   Pd(2)   Ru(2)   C(13)   C(14)   159.1(3) 1_555 1_555 1_555 1_555 yes
   Pd(2)   Ru(2)   C(13)   C(18)   -80.7(6) 1_555 1_555 1_555 1_555 yes
   Pd(2)   Ru(2)   C(14)   C(13)   -52.5(7) 1_555 1_555 1_555 1_555 yes
   Pd(2)   Ru(2)   C(14)   C(15)   62.7(7)  1_555 1_555 1_555 1_555 yes
   Pd(2)   Ru(2)   C(14)   C(19)   -173.4(4) 1_555 1_555 1_555 1_555 yes
   Pd(2)   Ru(2)   C(15)   C(11)   -36.1(5) 1_555 1_555 1_555 1_555 yes
   Pd(2)   Ru(2)   C(15)   C(14)   -155.4(3) 1_555 1_555 1_555 1_555 yes
   Pd(2)   Ru(2)   C(15)   C(20)   86.7(6)  1_555 1_555 1_555 1_555 yes
   Pd(2)   Cl(1)   Pd(1)   Ru(1)   -24.09(6) 1_555 1_555 1_555 1_555 yes
   Pd(2)   Cl(1)   Pd(1)   Ru(2)   32.27(5) 1_555 1_555 1_555 1_555 yes
   Pd(2)   Cl(1)   Pd(1)   S(1)    11.3(2)  1_555 1_555 1_555 1_555 yes
   Pd(2)   Cl(1)   Pd(1)   P(1)    -173.51(6) 1_555 1_555 1_555 1_555 yes
   Pd(2)   S(2)    Ru(1)   Ru(2)   -81.30(5) 1_555 1_555 1_555 1_555 yes
   Pd(2)   S(2)    Ru(1)   S(1)    -78.30(6) 1_555 1_555 1_555 1_555 yes
   Pd(2)   S(2)    Ru(1)   C(1)    152.5(2) 1_555 1_555 1_555 1_555 yes
   Pd(2)   S(2)    Ru(1)   C(2)    146.4(4) 1_555 1_555 1_555 1_555 yes
   Pd(2)   S(2)    Ru(1)   C(3)    76.5(3)  1_555 1_555 1_555 1_555 yes
   Pd(2)   S(2)    Ru(1)   C(4)    86.2(2)  1_555 1_555 1_555 1_555 yes
   Pd(2)   S(2)    Ru(1)   C(5)    120.9(2) 1_555 1_555 1_555 1_555 yes
   Pd(2)   S(2)    Ru(2)   Ru(1)   88.34(5) 1_555 1_555 1_555 1_555 yes
   Pd(2)   S(2)    Ru(2)   S(1)    85.35(6) 1_555 1_555 1_555 1_555 yes
   Pd(2)   S(2)    Ru(2)   C(11)   -69.7(2) 1_555 1_555 1_555 1_555 yes
   Pd(2)   S(2)    Ru(2)   C(12)   -94.2(2) 1_555 1_555 1_555 1_555 yes
   Pd(2)   S(2)    Ru(2)   C(13)   -132.1(2) 1_555 1_555 1_555 1_555 yes
   Pd(2)   S(2)    Ru(2)   C(14)   -151.8(2) 1_555 1_555 1_555 1_555 yes
   Pd(2)   S(2)    Ru(2)   C(15)   -98.2(5) 1_555 1_555 1_555 1_555 yes
   Pd(2)   P(2)    C(21)   C(22)   -69.3(5) 1_555 1_555 1_555 1_555 yes
   Pd(2)   P(2)    C(21)   C(26)   102.6(5) 1_555 1_555 1_555 1_555 yes
   Pd(2)   P(2)    C(27)   C(28)   147.0(5) 1_555 1_555 1_555 1_555 yes
   Pd(2)   P(2)    C(27)   C(32)   -31.7(6) 1_555 1_555 1_555 1_555 yes
   Pd(2)   P(2)    C(33)   C(34)   146.7(5) 1_555 1_555 1_555 1_555 yes
   Pd(2)   P(2)    C(33)   C(38)   -34.4(6) 1_555 1_555 1_555 1_555 yes
   Ru(1)   Pd(1)   Pd(2)   Ru(2)   -60.60(2) 1_555 1_555 1_555 1_555 yes
   Ru(1)   Pd(1)   Pd(2)   Cl(1)   155.05(7) 1_555 1_555 1_555 1_555 yes
   Ru(1)   Pd(1)   Pd(2)   S(2)    -28.65(5) 1_555 1_555 1_555 1_555 yes
   Ru(1)   Pd(1)   Pd(2)   P(2)    135.5(1) 1_555 1_555 1_555 1_555 yes
   Ru(1)   Pd(1)   Ru(2)   S(1)    -62.73(6) 1_555 1_555 1_555 1_555 yes
   Ru(1)   Pd(1)   Ru(2)   S(2)    45.29(4) 1_555 1_555 1_555 1_555 yes
   Ru(1)   Pd(1)   Ru(2)   C(11)   170.8(2) 1_555 1_555 1_555 1_555 yes
   Ru(1)   Pd(1)   Ru(2)   C(12)   147.6(2) 1_555 1_555 1_555 1_555 yes
   Ru(1)   Pd(1)   Ru(2)   C(13)   -173.2(5) 1_555 1_555 1_555 1_555 yes
   Ru(1)   Pd(1)   Ru(2)   C(14)   -127.7(2) 1_555 1_555 1_555 1_555 yes
   Ru(1)   Pd(1)   Ru(2)   C(15)   -152.0(2) 1_555 1_555 1_555 1_555 yes
   Ru(1)   Pd(1)   S(1)    Ru(2)   72.00(4) 1_555 1_555 1_555 1_555 yes
   Ru(1)   Pd(1)   P(1)    C(39)   147.5(2) 1_555 1_555 1_555 1_555 yes
   Ru(1)   Pd(1)   P(1)    C(45)   28.6(2)  1_555 1_555 1_555 1_555 yes
   Ru(1)   Pd(1)   P(1)    C(51)   -92.4(2) 1_555 1_555 1_555 1_555 yes
   Ru(1)   Pd(2)   Pd(1)   Ru(2)   60.60(2) 1_555 1_555 1_555 1_555 yes
   Ru(1)   Pd(2)   Pd(1)   Cl(1)   -155.05(7) 1_555 1_555 1_555 1_555 yes
   Ru(1)   Pd(2)   Pd(1)   S(1)    29.72(5) 1_555 1_555 1_555 1_555 yes
   Ru(1)   Pd(2)   Pd(1)   P(1)    -138.5(1) 1_555 1_555 1_555 1_555 yes
   Ru(1)   Pd(2)   Ru(2)   S(1)    -44.94(5) 1_555 1_555 1_555 1_555 yes
   Ru(1)   Pd(2)   Ru(2)   S(2)    62.29(6) 1_555 1_555 1_555 1_555 yes
   Ru(1)   Pd(2)   Ru(2)   C(11)   -169.9(2) 1_555 1_555 1_555 1_555 yes
   Ru(1)   Pd(2)   Ru(2)   C(12)   153.2(2) 1_555 1_555 1_555 1_555 yes
   Ru(1)   Pd(2)   Ru(2)   C(13)   128.4(2) 1_555 1_555 1_555 1_555 yes
   Ru(1)   Pd(2)   Ru(2)   C(14)   166.2(5) 1_555 1_555 1_555 1_555 yes
   Ru(1)   Pd(2)   Ru(2)   C(15)   -149.0(2) 1_555 1_555 1_555 1_555 yes
   Ru(1)   Pd(2)   S(2)    Ru(2)   -71.65(4) 1_555 1_555 1_555 1_555 yes
   Ru(1)   Pd(2)   P(2)    C(21)   -13.4(3) 1_555 1_555 1_555 1_555 yes
   Ru(1)   Pd(2)   P(2)    C(27)   107.0(2) 1_555 1_555 1_555 1_555 yes
   Ru(1)   Pd(2)   P(2)    C(33)   -134.0(2) 1_555 1_555 1_555 1_555 yes
   Ru(1)   Ru(2)   Pd(1)   Cl(1)   -106.16(6) 1_555 1_555 1_555 1_555 yes
   Ru(1)   Ru(2)   Pd(1)   S(1)    62.73(6) 1_555 1_555 1_555 1_555 yes
   Ru(1)   Ru(2)   Pd(1)   P(1)    114.62(8) 1_555 1_555 1_555 1_555 yes
   Ru(1)   Ru(2)   Pd(2)   Cl(1)   104.85(6) 1_555 1_555 1_555 1_555 yes
   Ru(1)   Ru(2)   Pd(2)   S(2)    -62.29(6) 1_555 1_555 1_555 1_555 yes
   Ru(1)   Ru(2)   Pd(2)   P(2)    -114.77(8) 1_555 1_555 1_555 1_555 yes
   Ru(1)   Ru(2)   C(11)   C(12)   -120.9(5) 1_555 1_555 1_555 1_555 yes
   Ru(1)   Ru(2)   C(11)   C(15)   121.7(5) 1_555 1_555 1_555 1_555 yes
   Ru(1)   Ru(2)   C(11)   C(16)   0(1)     1_555 1_555 1_555 1_555 yes
   Ru(1)   Ru(2)   C(12)   C(11)   148.6(3) 1_555 1_555 1_555 1_555 yes
   Ru(1)   Ru(2)   C(12)   C(13)   -92.9(4) 1_555 1_555 1_555 1_555 yes
   Ru(1)   Ru(2)   C(12)   C(17)   26.4(9)  1_555 1_555 1_555 1_555 yes
   Ru(1)   Ru(2)   C(13)   C(12)   134.5(3) 1_555 1_555 1_555 1_555 yes
   Ru(1)   Ru(2)   C(13)   C(14)   -109.1(4) 1_555 1_555 1_555 1_555 yes
   Ru(1)   Ru(2)   C(13)   C(18)   11.1(7)  1_555 1_555 1_555 1_555 yes
   Ru(1)   Ru(2)   C(14)   C(13)   109.8(4) 1_555 1_555 1_555 1_555 yes
   Ru(1)   Ru(2)   C(14)   C(15)   -134.9(3) 1_555 1_555 1_555 1_555 yes
   Ru(1)   Ru(2)   C(14)   C(19)   -11.1(7) 1_555 1_555 1_555 1_555 yes
   Ru(1)   Ru(2)   C(15)   C(11)   -148.8(3) 1_555 1_555 1_555 1_555 yes
   Ru(1)   Ru(2)   C(15)   C(14)   91.9(5)  1_555 1_555 1_555 1_555 yes
   Ru(1)   Ru(2)   C(15)   C(20)   -26.0(9) 1_555 1_555 1_555 1_555 yes
   Ru(1)   S(1)    Pd(1)   Ru(2)   -72.00(4) 1_555 1_555 1_555 1_555 yes
   Ru(1)   S(1)    Pd(1)   Cl(1)   -45.6(2) 1_555 1_555 1_555 1_555 yes
   Ru(1)   S(1)    Pd(1)   P(1)    139.10(6) 1_555 1_555 1_555 1_555 yes
   Ru(1)   S(1)    Ru(2)   S(2)    3.00(6)  1_555 1_555 1_555 1_555 yes
   Ru(1)   S(1)    Ru(2)   C(11)   158.3(2) 1_555 1_555 1_555 1_555 yes
   Ru(1)   S(1)    Ru(2)   C(12)   -178.1(5) 1_555 1_555 1_555 1_555 yes
   Ru(1)   S(1)    Ru(2)   C(13)   -119.5(3) 1_555 1_555 1_555 1_555 yes
   Ru(1)   S(1)    Ru(2)   C(14)   -137.9(2) 1_555 1_555 1_555 1_555 yes
   Ru(1)   S(1)    Ru(2)   C(15)   -175.6(2) 1_555 1_555 1_555 1_555 yes
   Ru(1)   S(2)    Pd(2)   Ru(2)   71.65(4) 1_555 1_555 1_555 1_555 yes
   Ru(1)   S(2)    Pd(2)   Cl(1)   41.8(2)  1_555 1_555 1_555 1_555 yes
   Ru(1)   S(2)    Pd(2)   P(2)    -139.03(6) 1_555 1_555 1_555 1_555 yes
   Ru(1)   S(2)    Ru(2)   S(1)    -2.99(6) 1_555 1_555 1_555 1_555 yes
   Ru(1)   S(2)    Ru(2)   C(11)   -158.0(2) 1_555 1_555 1_555 1_555 yes
   Ru(1)   S(2)    Ru(2)   C(12)   177.4(2) 1_555 1_555 1_555 1_555 yes
   Ru(1)   S(2)    Ru(2)   C(13)   139.5(2) 1_555 1_555 1_555 1_555 yes
   Ru(1)   S(2)    Ru(2)   C(14)   119.9(2) 1_555 1_555 1_555 1_555 yes
   Ru(1)   S(2)    Ru(2)   C(15)   173.5(5) 1_555 1_555 1_555 1_555 yes
   Ru(1)   C(1)    C(2)    C(3)    61.4(5)  1_555 1_555 1_555 1_555 yes
   Ru(1)   C(1)    C(2)    C(7)    -121.6(7) 1_555 1_555 1_555 1_555 yes
   Ru(1)   C(1)    C(5)    C(4)    -61.7(5) 1_555 1_555 1_555 1_555 yes
   Ru(1)   C(1)    C(5)    C(10)   121.6(7) 1_555 1_555 1_555 1_555 yes
   Ru(1)   C(2)    C(1)    C(5)    -64.4(5) 1_555 1_555 1_555 1_555 yes
   Ru(1)   C(2)    C(1)    C(6)    122.7(7) 1_555 1_555 1_555 1_555 yes
   Ru(1)   C(2)    C(3)    C(4)    62.2(4)  1_555 1_555 1_555 1_555 yes
   Ru(1)   C(2)    C(3)    C(8)    -125.5(6) 1_555 1_555 1_555 1_555 yes
   Ru(1)   C(3)    C(2)    C(1)    -60.3(5) 1_555 1_555 1_555 1_555 yes
   Ru(1)   C(3)    C(2)    C(7)    122.6(7) 1_555 1_555 1_555 1_555 yes
   Ru(1)   C(3)    C(4)    C(5)    62.7(5)  1_555 1_555 1_555 1_555 yes
   Ru(1)   C(3)    C(4)    C(9)    -123.0(7) 1_555 1_555 1_555 1_555 yes
   Ru(1)   C(4)    C(3)    C(2)    -62.7(4) 1_555 1_555 1_555 1_555 yes
   Ru(1)   C(4)    C(3)    C(8)    125.3(7) 1_555 1_555 1_555 1_555 yes
   Ru(1)   C(4)    C(5)    C(1)    60.9(5)  1_555 1_555 1_555 1_555 yes
   Ru(1)   C(4)    C(5)    C(10)   -122.4(7) 1_555 1_555 1_555 1_555 yes
   Ru(1)   C(5)    C(1)    C(2)    64.8(5)  1_555 1_555 1_555 1_555 yes
   Ru(1)   C(5)    C(1)    C(6)    -122.5(7) 1_555 1_555 1_555 1_555 yes
   Ru(1)   C(5)    C(4)    C(3)    -62.8(5) 1_555 1_555 1_555 1_555 yes
   Ru(1)   C(5)    C(4)    C(9)    123.1(7) 1_555 1_555 1_555 1_555 yes
   Ru(2)   Pd(1)   Pd(2)   Cl(1)   -144.35(7) 1_555 1_555 1_555 1_555 yes
   Ru(2)   Pd(1)   Pd(2)   S(2)    31.95(5) 1_555 1_555 1_555 1_555 yes
   Ru(2)   Pd(1)   Pd(2)   P(2)    -163.9(1) 1_555 1_555 1_555 1_555 yes
   Ru(2)   Pd(1)   Ru(1)   S(1)    66.60(6) 1_555 1_555 1_555 1_555 yes
   Ru(2)   Pd(1)   Ru(1)   S(2)    -44.94(4) 1_555 1_555 1_555 1_555 yes
   Ru(2)   Pd(1)   Ru(1)   C(1)    127.0(4) 1_555 1_555 1_555 1_555 yes
   Ru(2)   Pd(1)   Ru(1)   C(2)    136.0(2) 1_555 1_555 1_555 1_555 yes
   Ru(2)   Pd(1)   Ru(1)   C(3)    170.4(2) 1_555 1_555 1_555 1_555 yes
   Ru(2)   Pd(1)   Ru(1)   C(4)    -155.0(2) 1_555 1_555 1_555 1_555 yes
   Ru(2)   Pd(1)   Ru(1)   C(5)    -148.8(4) 1_555 1_555 1_555 1_555 yes
   Ru(2)   Pd(1)   P(1)    C(39)   68.0(2)  1_555 1_555 1_555 1_555 yes
   Ru(2)   Pd(1)   P(1)    C(45)   -50.9(3) 1_555 1_555 1_555 1_555 yes
   Ru(2)   Pd(1)   P(1)    C(51)   -171.9(2) 1_555 1_555 1_555 1_555 yes
   Ru(2)   Pd(2)   Pd(1)   Cl(1)   144.35(7) 1_555 1_555 1_555 1_555 yes
   Ru(2)   Pd(2)   Pd(1)   S(1)    -30.88(5) 1_555 1_555 1_555 1_555 yes
   Ru(2)   Pd(2)   Pd(1)   P(1)    160.9(1) 1_555 1_555 1_555 1_555 yes
   Ru(2)   Pd(2)   Ru(1)   S(1)    44.56(4) 1_555 1_555 1_555 1_555 yes
   Ru(2)   Pd(2)   Ru(1)   S(2)    -66.98(6) 1_555 1_555 1_555 1_555 yes
   Ru(2)   Pd(2)   Ru(1)   C(1)    -126.1(4) 1_555 1_555 1_555 1_555 yes
   Ru(2)   Pd(2)   Ru(1)   C(2)    148.7(4) 1_555 1_555 1_555 1_555 yes
   Ru(2)   Pd(2)   Ru(1)   C(3)    153.8(2) 1_555 1_555 1_555 1_555 yes
   Ru(2)   Pd(2)   Ru(1)   C(4)    -171.4(2) 1_555 1_555 1_555 1_555 yes
   Ru(2)   Pd(2)   Ru(1)   C(5)    -136.7(2) 1_555 1_555 1_555 1_555 yes
   Ru(2)   Pd(2)   P(2)    C(21)   66.6(3)  1_555 1_555 1_555 1_555 yes
   Ru(2)   Pd(2)   P(2)    C(27)   -172.9(2) 1_555 1_555 1_555 1_555 yes
   Ru(2)   Pd(2)   P(2)    C(33)   -54.0(3) 1_555 1_555 1_555 1_555 yes
   Ru(2)   Ru(1)   Pd(1)   Cl(1)   94.60(6) 1_555 1_555 1_555 1_555 yes
   Ru(2)   Ru(1)   Pd(1)   S(1)    -66.60(6) 1_555 1_555 1_555 1_555 yes
   Ru(2)   Ru(1)   Pd(1)   P(1)    -127.34(6) 1_555 1_555 1_555 1_555 yes
   Ru(2)   Ru(1)   Pd(2)   Cl(1)   -95.10(6) 1_555 1_555 1_555 1_555 yes
   Ru(2)   Ru(1)   Pd(2)   S(2)    66.98(6) 1_555 1_555 1_555 1_555 yes
   Ru(2)   Ru(1)   Pd(2)   P(2)    128.47(6) 1_555 1_555 1_555 1_555 yes
   Ru(2)   Ru(1)   C(1)    C(2)    121.7(4) 1_555 1_555 1_555 1_555 yes
   Ru(2)   Ru(1)   C(1)    C(5)    -122.7(4) 1_555 1_555 1_555 1_555 yes
   Ru(2)   Ru(1)   C(1)    C(6)    0.6(9)   1_555 1_555 1_555 1_555 yes
   Ru(2)   Ru(1)   C(2)    C(1)    -99.3(4) 1_555 1_555 1_555 1_555 yes
   Ru(2)   Ru(1)   C(2)    C(3)    142.0(3) 1_555 1_555 1_555 1_555 yes
   Ru(2)   Ru(1)   C(2)    C(7)    21.7(8)  1_555 1_555 1_555 1_555 yes
   Ru(2)   Ru(1)   C(3)    C(2)    -99.5(5) 1_555 1_555 1_555 1_555 yes
   Ru(2)   Ru(1)   C(3)    C(4)    144.4(4) 1_555 1_555 1_555 1_555 yes
   Ru(2)   Ru(1)   C(3)    C(8)    20(1)    1_555 1_555 1_555 1_555 yes
   Ru(2)   Ru(1)   C(4)    C(3)    -142.9(4) 1_555 1_555 1_555 1_555 yes
   Ru(2)   Ru(1)   C(4)    C(5)    99.7(6)  1_555 1_555 1_555 1_555 yes
   Ru(2)   Ru(1)   C(4)    C(9)    -23(1)   1_555 1_555 1_555 1_555 yes
   Ru(2)   Ru(1)   C(5)    C(1)    98.7(4)  1_555 1_555 1_555 1_555 yes
   Ru(2)   Ru(1)   C(5)    C(4)    -143.1(3) 1_555 1_555 1_555 1_555 yes
   Ru(2)   Ru(1)   C(5)    C(10)   -21(1)   1_555 1_555 1_555 1_555 yes
   Ru(2)   S(1)    Pd(1)   Cl(1)   26.4(2)  1_555 1_555 1_555 1_555 yes
   Ru(2)   S(1)    Pd(1)   P(1)    -148.90(6) 1_555 1_555 1_555 1_555 yes
   Ru(2)   S(1)    Ru(1)   S(2)    -3.00(6) 1_555 1_555 1_555 1_555 yes
   Ru(2)   S(1)    Ru(1)   C(1)    126.1(2) 1_555 1_555 1_555 1_555 yes
   Ru(2)   S(1)    Ru(1)   C(2)    157.3(2) 1_555 1_555 1_555 1_555 yes
   Ru(2)   S(1)    Ru(1)   C(3)    -167.6(2) 1_555 1_555 1_555 1_555 yes
   Ru(2)   S(1)    Ru(1)   C(4)    -158.3(3) 1_555 1_555 1_555 1_555 yes
   Ru(2)   S(1)    Ru(1)   C(5)    133.5(4) 1_555 1_555 1_555 1_555 yes
   Ru(2)   S(2)    Pd(2)   Cl(1)   -29.8(2) 1_555 1_555 1_555 1_555 yes
   Ru(2)   S(2)    Pd(2)   P(2)    149.32(6) 1_555 1_555 1_555 1_555 yes
   Ru(2)   S(2)    Ru(1)   S(1)    3.00(6)  1_555 1_555 1_555 1_555 yes
   Ru(2)   S(2)    Ru(1)   C(1)    -126.2(2) 1_555 1_555 1_555 1_555 yes
   Ru(2)   S(2)    Ru(1)   C(2)    -132.3(4) 1_555 1_555 1_555 1_555 yes
   Ru(2)   S(2)    Ru(1)   C(3)    157.8(3) 1_555 1_555 1_555 1_555 yes
   Ru(2)   S(2)    Ru(1)   C(4)    167.5(2) 1_555 1_555 1_555 1_555 yes
   Ru(2)   S(2)    Ru(1)   C(5)    -157.8(2) 1_555 1_555 1_555 1_555 yes
   Ru(2)   C(11)   C(12)   C(13)   -60.0(4) 1_555 1_555 1_555 1_555 yes
   Ru(2)   C(11)   C(12)   C(17)   122.6(6) 1_555 1_555 1_555 1_555 yes
   Ru(2)   C(11)   C(15)   C(14)   59.5(4)  1_555 1_555 1_555 1_555 yes
   Ru(2)   C(11)   C(15)   C(20)   -123.0(7) 1_555 1_555 1_555 1_555 yes
   Ru(2)   C(12)   C(11)   C(15)   63.0(5)  1_555 1_555 1_555 1_555 yes
   Ru(2)   C(12)   C(11)   C(16)   -124.9(7) 1_555 1_555 1_555 1_555 yes
   Ru(2)   C(12)   C(13)   C(14)   -62.9(4) 1_555 1_555 1_555 1_555 yes
   Ru(2)   C(12)   C(13)   C(18)   119.0(7) 1_555 1_555 1_555 1_555 yes
   Ru(2)   C(13)   C(12)   C(11)   61.4(5)  1_555 1_555 1_555 1_555 yes
   Ru(2)   C(13)   C(12)   C(17)   -121.2(6) 1_555 1_555 1_555 1_555 yes
   Ru(2)   C(13)   C(14)   C(15)   -64.6(4) 1_555 1_555 1_555 1_555 yes
   Ru(2)   C(13)   C(14)   C(19)   120.4(6) 1_555 1_555 1_555 1_555 yes
   Ru(2)   C(14)   C(13)   C(12)   64.0(4)  1_555 1_555 1_555 1_555 yes
   Ru(2)   C(14)   C(13)   C(18)   -117.8(6) 1_555 1_555 1_555 1_555 yes
   Ru(2)   C(14)   C(15)   C(11)   -60.6(5) 1_555 1_555 1_555 1_555 yes
   Ru(2)   C(14)   C(15)   C(20)   121.8(6) 1_555 1_555 1_555 1_555 yes
   Ru(2)   C(15)   C(11)   C(12)   -62.9(5) 1_555 1_555 1_555 1_555 yes
   Ru(2)   C(15)   C(11)   C(16)   124.9(6) 1_555 1_555 1_555 1_555 yes
   Ru(2)   C(15)   C(14)   C(13)   63.0(4)  1_555 1_555 1_555 1_555 yes
   Ru(2)   C(15)   C(14)   C(19)   -122.0(7) 1_555 1_555 1_555 1_555 yes
   Cl(1)   Pd(1)   Pd(2)   S(2)    176.30(8) 1_555 1_555 1_555 1_555 yes
   Cl(1)   Pd(1)   Pd(2)   P(2)    -19.5(1) 1_555 1_555 1_555 1_555 yes
   Cl(1)   Pd(1)   Ru(1)   S(1)    161.20(8) 1_555 1_555 1_555 1_555 yes
   Cl(1)   Pd(1)   Ru(1)   S(2)    49.66(7) 1_555 1_555 1_555 1_555 yes
   Cl(1)   Pd(1)   Ru(1)   C(1)    -138.4(4) 1_555 1_555 1_555 1_555 yes
   Cl(1)   Pd(1)   Ru(1)   C(2)    -129.4(2) 1_555 1_555 1_555 1_555 yes
   Cl(1)   Pd(1)   Ru(1)   C(3)    -95.0(2) 1_555 1_555 1_555 1_555 yes
   Cl(1)   Pd(1)   Ru(1)   C(4)    -60.4(2) 1_555 1_555 1_555 1_555 yes
   Cl(1)   Pd(1)   Ru(1)   C(5)    -54.2(4) 1_555 1_555 1_555 1_555 yes
   Cl(1)   Pd(1)   Ru(2)   S(1)    -168.89(8) 1_555 1_555 1_555 1_555 yes
   Cl(1)   Pd(1)   Ru(2)   S(2)    -60.87(7) 1_555 1_555 1_555 1_555 yes
   Cl(1)   Pd(1)   Ru(2)   C(11)   64.7(2)  1_555 1_555 1_555 1_555 yes
   Cl(1)   Pd(1)   Ru(2)   C(12)   41.4(2)  1_555 1_555 1_555 1_555 yes
   Cl(1)   Pd(1)   Ru(2)   C(13)   80.6(6)  1_555 1_555 1_555 1_555 yes
   Cl(1)   Pd(1)   Ru(2)   C(14)   126.1(2) 1_555 1_555 1_555 1_555 yes
   Cl(1)   Pd(1)   Ru(2)   C(15)   101.9(2) 1_555 1_555 1_555 1_555 yes
   Cl(1)   Pd(1)   P(1)    C(39)   -71.9(2) 1_555 1_555 1_555 1_555 yes
   Cl(1)   Pd(1)   P(1)    C(45)   169.2(2) 1_555 1_555 1_555 1_555 yes
   Cl(1)   Pd(1)   P(1)    C(51)   48.2(2)  1_555 1_555 1_555 1_555 yes
   Cl(1)   Pd(2)   Pd(1)   S(1)    -175.23(8) 1_555 1_555 1_555 1_555 yes
   Cl(1)   Pd(2)   Pd(1)   P(1)    16.6(1)  1_555 1_555 1_555 1_555 yes
   Cl(1)   Pd(2)   Ru(1)   S(1)    -50.54(7) 1_555 1_555 1_555 1_555 yes
   Cl(1)   Pd(2)   Ru(1)   S(2)    -162.09(8) 1_555 1_555 1_555 1_555 yes
   Cl(1)   Pd(2)   Ru(1)   C(1)    138.8(4) 1_555 1_555 1_555 1_555 yes
   Cl(1)   Pd(2)   Ru(1)   C(2)    53.6(4)  1_555 1_555 1_555 1_555 yes
   Cl(1)   Pd(2)   Ru(1)   C(3)    58.7(2)  1_555 1_555 1_555 1_555 yes
   Cl(1)   Pd(2)   Ru(1)   C(4)    93.5(2)  1_555 1_555 1_555 1_555 yes
   Cl(1)   Pd(2)   Ru(1)   C(5)    128.2(2) 1_555 1_555 1_555 1_555 yes
   Cl(1)   Pd(2)   Ru(2)   S(1)    59.91(7) 1_555 1_555 1_555 1_555 yes
   Cl(1)   Pd(2)   Ru(2)   S(2)    167.14(8) 1_555 1_555 1_555 1_555 yes
   Cl(1)   Pd(2)   Ru(2)   C(11)   -65.1(2) 1_555 1_555 1_555 1_555 yes
   Cl(1)   Pd(2)   Ru(2)   C(12)   -102.0(2) 1_555 1_555 1_555 1_555 yes
   Cl(1)   Pd(2)   Ru(2)   C(13)   -126.7(2) 1_555 1_555 1_555 1_555 yes
   Cl(1)   Pd(2)   Ru(2)   C(14)   -89.0(5) 1_555 1_555 1_555 1_555 yes
   Cl(1)   Pd(2)   Ru(2)   C(15)   -44.2(2) 1_555 1_555 1_555 1_555 yes
   Cl(1)   Pd(2)   P(2)    C(21)   -152.2(2) 1_555 1_555 1_555 1_555 yes
   Cl(1)   Pd(2)   P(2)    C(27)   -31.8(2) 1_555 1_555 1_555 1_555 yes
   Cl(1)   Pd(2)   P(2)    C(33)   87.2(2)  1_555 1_555 1_555 1_555 yes
   S(1)    Pd(1)   Pd(2)   S(2)    1.07(6)  1_555 1_555 1_555 1_555 yes
   S(1)    Pd(1)   Pd(2)   P(2)    165.3(1) 1_555 1_555 1_555 1_555 yes
   S(1)    Pd(1)   Ru(1)   S(2)    -111.54(7) 1_555 1_555 1_555 1_555 yes
   S(1)    Pd(1)   Ru(1)   C(1)    60.4(4)  1_555 1_555 1_555 1_555 yes
   S(1)    Pd(1)   Ru(1)   C(2)    69.4(2)  1_555 1_555 1_555 1_555 yes
   S(1)    Pd(1)   Ru(1)   C(3)    103.8(2) 1_555 1_555 1_555 1_555 yes
   S(1)    Pd(1)   Ru(1)   C(4)    138.4(2) 1_555 1_555 1_555 1_555 yes
   S(1)    Pd(1)   Ru(1)   C(5)    144.6(4) 1_555 1_555 1_555 1_555 yes
   S(1)    Pd(1)   Ru(2)   S(2)    108.02(7) 1_555 1_555 1_555 1_555 yes
   S(1)    Pd(1)   Ru(2)   C(11)   -126.5(2) 1_555 1_555 1_555 1_555 yes
   S(1)    Pd(1)   Ru(2)   C(12)   -149.7(2) 1_555 1_555 1_555 1_555 yes
   S(1)    Pd(1)   Ru(2)   C(13)   -110.5(5) 1_555 1_555 1_555 1_555 yes
   S(1)    Pd(1)   Ru(2)   C(14)   -65.0(2) 1_555 1_555 1_555 1_555 yes
   S(1)    Pd(1)   Ru(2)   C(15)   -89.2(2) 1_555 1_555 1_555 1_555 yes
   S(1)    Pd(1)   P(1)    C(39)   106.1(2) 1_555 1_555 1_555 1_555 yes
   S(1)    Pd(1)   P(1)    C(45)   -12.8(2) 1_555 1_555 1_555 1_555 yes
   S(1)    Pd(1)   P(1)    C(51)   -133.9(2) 1_555 1_555 1_555 1_555 yes
   S(1)    Ru(1)   Pd(1)   P(1)    -60.74(8) 1_555 1_555 1_555 1_555 yes
   S(1)    Ru(1)   Pd(2)   S(2)    111.55(7) 1_555 1_555 1_555 1_555 yes
   S(1)    Ru(1)   Pd(2)   P(2)    173.03(7) 1_555 1_555 1_555 1_555 yes
   S(1)    Ru(1)   Ru(2)   S(2)    -176.51(7) 1_555 1_555 1_555 1_555 yes
   S(1)    Ru(1)   Ru(2)   C(11)   -86.9(6) 1_555 1_555 1_555 1_555 yes
   S(1)    Ru(1)   Ru(2)   C(12)   178.5(3) 1_555 1_555 1_555 1_555 yes
   S(1)    Ru(1)   Ru(2)   C(13)   120.3(3) 1_555 1_555 1_555 1_555 yes
   S(1)    Ru(1)   Ru(2)   C(14)   66.2(3)  1_555 1_555 1_555 1_555 yes
   S(1)    Ru(1)   Ru(2)   C(15)   8.6(4)   1_555 1_555 1_555 1_555 yes
   S(1)    Ru(1)   C(1)    C(2)    58.5(4)  1_555 1_555 1_555 1_555 yes
   S(1)    Ru(1)   C(1)    C(5)    174.1(4) 1_555 1_555 1_555 1_555 yes
   S(1)    Ru(1)   C(1)    C(6)    -62.6(7) 1_555 1_555 1_555 1_555 yes
   S(1)    Ru(1)   C(2)    C(1)    -129.0(4) 1_555 1_555 1_555 1_555 yes
   S(1)    Ru(1)   C(2)    C(3)    112.3(4) 1_555 1_555 1_555 1_555 yes
   S(1)    Ru(1)   C(2)    C(7)    -8.0(6)  1_555 1_555 1_555 1_555 yes
   S(1)    Ru(1)   C(3)    C(2)    -73.2(4) 1_555 1_555 1_555 1_555 yes
   S(1)    Ru(1)   C(3)    C(4)    170.7(4) 1_555 1_555 1_555 1_555 yes
   S(1)    Ru(1)   C(3)    C(8)    46.5(7)  1_555 1_555 1_555 1_555 yes
   S(1)    Ru(1)   C(4)    C(3)    -14.7(6) 1_555 1_555 1_555 1_555 yes
   S(1)    Ru(1)   C(4)    C(5)    -132.1(4) 1_555 1_555 1_555 1_555 yes
   S(1)    Ru(1)   C(4)    C(9)    105.0(7) 1_555 1_555 1_555 1_555 yes
   S(1)    Ru(1)   C(5)    C(1)    -11.2(7) 1_555 1_555 1_555 1_555 yes
   S(1)    Ru(1)   C(5)    C(4)    107.0(6) 1_555 1_555 1_555 1_555 yes
   S(1)    Ru(1)   C(5)    C(10)   -131.7(7) 1_555 1_555 1_555 1_555 yes
   S(1)    Ru(2)   Pd(1)   P(1)    51.90(9) 1_555 1_555 1_555 1_555 yes
   S(1)    Ru(2)   Pd(2)   S(2)    -107.23(7) 1_555 1_555 1_555 1_555 yes
   S(1)    Ru(2)   Pd(2)   P(2)    -159.70(9) 1_555 1_555 1_555 1_555 yes
   S(1)    Ru(2)   Ru(1)   S(2)    176.51(7) 1_555 1_555 1_555 1_555 yes
   S(1)    Ru(2)   Ru(1)   C(1)    -91.9(3) 1_555 1_555 1_555 1_555 yes
   S(1)    Ru(2)   Ru(1)   C(2)    -37.5(3) 1_555 1_555 1_555 1_555 yes
   S(1)    Ru(2)   Ru(1)   C(3)    31.7(5)  1_555 1_555 1_555 1_555 yes
   S(1)    Ru(2)   Ru(1)   C(4)    143.4(6) 1_555 1_555 1_555 1_555 yes
   S(1)    Ru(2)   Ru(1)   C(5)    -146.4(4) 1_555 1_555 1_555 1_555 yes
   S(1)    Ru(2)   C(11)   C(12)   164.5(3) 1_555 1_555 1_555 1_555 yes
   S(1)    Ru(2)   C(11)   C(15)   47.1(4)  1_555 1_555 1_555 1_555 yes
   S(1)    Ru(2)   C(11)   C(16)   -73.8(7) 1_555 1_555 1_555 1_555 yes
   S(1)    Ru(2)   C(12)   C(11)   -34.5(7) 1_555 1_555 1_555 1_555 yes
   S(1)    Ru(2)   C(12)   C(13)   84.0(6)  1_555 1_555 1_555 1_555 yes
   S(1)    Ru(2)   C(12)   C(17)   -156.6(4) 1_555 1_555 1_555 1_555 yes
   S(1)    Ru(2)   C(13)   C(12)   -146.4(3) 1_555 1_555 1_555 1_555 yes
   S(1)    Ru(2)   C(13)   C(14)   -30.1(5) 1_555 1_555 1_555 1_555 yes
   S(1)    Ru(2)   C(13)   C(18)   90.1(6)  1_555 1_555 1_555 1_555 yes
   S(1)    Ru(2)   C(14)   C(13)   158.7(4) 1_555 1_555 1_555 1_555 yes
   S(1)    Ru(2)   C(14)   C(15)   -86.1(4) 1_555 1_555 1_555 1_555 yes
   S(1)    Ru(2)   C(14)   C(19)   37.8(6)  1_555 1_555 1_555 1_555 yes
   S(1)    Ru(2)   C(15)   C(11)   -141.7(4) 1_555 1_555 1_555 1_555 yes
   S(1)    Ru(2)   C(15)   C(14)   99.0(4)  1_555 1_555 1_555 1_555 yes
   S(1)    Ru(2)   C(15)   C(20)   -19.0(6) 1_555 1_555 1_555 1_555 yes
   S(2)    Pd(2)   Pd(1)   P(1)    -167.1(1) 1_555 1_555 1_555 1_555 yes
   S(2)    Pd(2)   Ru(1)   C(1)    -59.1(4) 1_555 1_555 1_555 1_555 yes
   S(2)    Pd(2)   Ru(1)   C(2)    -144.3(4) 1_555 1_555 1_555 1_555 yes
   S(2)    Pd(2)   Ru(1)   C(3)    -139.2(2) 1_555 1_555 1_555 1_555 yes
   S(2)    Pd(2)   Ru(1)   C(4)    -104.4(2) 1_555 1_555 1_555 1_555 yes
   S(2)    Pd(2)   Ru(1)   C(5)    -69.7(2) 1_555 1_555 1_555 1_555 yes
   S(2)    Pd(2)   Ru(2)   C(11)   127.8(2) 1_555 1_555 1_555 1_555 yes
   S(2)    Pd(2)   Ru(2)   C(12)   90.9(2)  1_555 1_555 1_555 1_555 yes
   S(2)    Pd(2)   Ru(2)   C(13)   66.1(2)  1_555 1_555 1_555 1_555 yes
   S(2)    Pd(2)   Ru(2)   C(14)   103.9(5) 1_555 1_555 1_555 1_555 yes
   S(2)    Pd(2)   Ru(2)   C(15)   148.7(2) 1_555 1_555 1_555 1_555 yes
   S(2)    Pd(2)   P(2)    C(21)   28.1(2)  1_555 1_555 1_555 1_555 yes
   S(2)    Pd(2)   P(2)    C(27)   148.6(2) 1_555 1_555 1_555 1_555 yes
   S(2)    Pd(2)   P(2)    C(33)   -92.5(2) 1_555 1_555 1_555 1_555 yes
   S(2)    Ru(1)   Pd(1)   P(1)    -172.29(7) 1_555 1_555 1_555 1_555 yes
   S(2)    Ru(1)   Pd(2)   P(2)    61.48(8) 1_555 1_555 1_555 1_555 yes
   S(2)    Ru(1)   Ru(2)   C(11)   89.6(6)  1_555 1_555 1_555 1_555 yes
   S(2)    Ru(1)   Ru(2)   C(12)   -5.0(3)  1_555 1_555 1_555 1_555 yes
   S(2)    Ru(1)   Ru(2)   C(13)   -63.2(3) 1_555 1_555 1_555 1_555 yes
   S(2)    Ru(1)   Ru(2)   C(14)   -117.3(3) 1_555 1_555 1_555 1_555 yes
   S(2)    Ru(1)   Ru(2)   C(15)   -174.9(4) 1_555 1_555 1_555 1_555 yes
   S(2)    Ru(1)   C(1)    C(2)    -175.2(3) 1_555 1_555 1_555 1_555 yes
   S(2)    Ru(1)   C(1)    C(5)    -59.6(5) 1_555 1_555 1_555 1_555 yes
   S(2)    Ru(1)   C(1)    C(6)    63.7(7)  1_555 1_555 1_555 1_555 yes
   S(2)    Ru(1)   C(2)    C(1)    9.2(7)   1_555 1_555 1_555 1_555 yes
   S(2)    Ru(1)   C(2)    C(3)    -109.5(5) 1_555 1_555 1_555 1_555 yes
   S(2)    Ru(1)   C(2)    C(7)    130.2(5) 1_555 1_555 1_555 1_555 yes
   S(2)    Ru(1)   C(3)    C(2)    131.5(4) 1_555 1_555 1_555 1_555 yes
   S(2)    Ru(1)   C(3)    C(4)    15.3(6)  1_555 1_555 1_555 1_555 yes
   S(2)    Ru(1)   C(3)    C(8)    -108.8(7) 1_555 1_555 1_555 1_555 yes
   S(2)    Ru(1)   C(4)    C(3)    -170.4(4) 1_555 1_555 1_555 1_555 yes
   S(2)    Ru(1)   C(4)    C(5)    72.2(4)  1_555 1_555 1_555 1_555 yes
   S(2)    Ru(1)   C(4)    C(9)    -50.7(8) 1_555 1_555 1_555 1_555 yes
   S(2)    Ru(1)   C(5)    C(1)    128.1(4) 1_555 1_555 1_555 1_555 yes
   S(2)    Ru(1)   C(5)    C(4)    -113.7(4) 1_555 1_555 1_555 1_555 yes
   S(2)    Ru(1)   C(5)    C(10)   7.6(8)   1_555 1_555 1_555 1_555 yes
   S(2)    Ru(2)   Pd(1)   P(1)    159.92(8) 1_555 1_555 1_555 1_555 yes
   S(2)    Ru(2)   Pd(2)   P(2)    -52.48(9) 1_555 1_555 1_555 1_555 yes
   S(2)    Ru(2)   Ru(1)   C(1)    91.6(3)  1_555 1_555 1_555 1_555 yes
   S(2)    Ru(2)   Ru(1)   C(2)    146.0(3) 1_555 1_555 1_555 1_555 yes
   S(2)    Ru(2)   Ru(1)   C(3)    -144.8(5) 1_555 1_555 1_555 1_555 yes
   S(2)    Ru(2)   Ru(1)   C(4)    -33.1(6) 1_555 1_555 1_555 1_555 yes
   S(2)    Ru(2)   Ru(1)   C(5)    37.1(3)  1_555 1_555 1_555 1_555 yes
   S(2)    Ru(2)   C(11)   C(12)   -43.9(4) 1_555 1_555 1_555 1_555 yes
   S(2)    Ru(2)   C(11)   C(15)   -161.2(3) 1_555 1_555 1_555 1_555 yes
   S(2)    Ru(2)   C(11)   C(16)   77.8(7)  1_555 1_555 1_555 1_555 yes
   S(2)    Ru(2)   C(12)   C(11)   144.5(4) 1_555 1_555 1_555 1_555 yes
   S(2)    Ru(2)   C(12)   C(13)   -97.0(4) 1_555 1_555 1_555 1_555 yes
   S(2)    Ru(2)   C(12)   C(17)   22.4(6)  1_555 1_555 1_555 1_555 yes
   S(2)    Ru(2)   C(13)   C(12)   87.4(4)  1_555 1_555 1_555 1_555 yes
   S(2)    Ru(2)   C(13)   C(14)   -156.3(4) 1_555 1_555 1_555 1_555 yes
   S(2)    Ru(2)   C(13)   C(18)   -36.1(6) 1_555 1_555 1_555 1_555 yes
   S(2)    Ru(2)   C(14)   C(13)   32.5(5)  1_555 1_555 1_555 1_555 yes
   S(2)    Ru(2)   C(14)   C(15)   147.8(3) 1_555 1_555 1_555 1_555 yes
   S(2)    Ru(2)   C(14)   C(19)   -88.4(6) 1_555 1_555 1_555 1_555 yes
   S(2)    Ru(2)   C(15)   C(11)   41.6(7)  1_555 1_555 1_555 1_555 yes
   S(2)    Ru(2)   C(15)   C(14)   -77.7(6) 1_555 1_555 1_555 1_555 yes
   S(2)    Ru(2)   C(15)   C(20)   164.4(4) 1_555 1_555 1_555 1_555 yes
   P(1)    Pd(1)   Pd(2)   P(2)    -2.9(2)  1_555 1_555 1_555 1_555 yes
   P(1)    Pd(1)   Ru(1)   C(1)    -0.4(4)  1_555 1_555 1_555 1_555 yes
   P(1)    Pd(1)   Ru(1)   C(2)    8.7(2)   1_555 1_555 1_555 1_555 yes
   P(1)    Pd(1)   Ru(1)   C(3)    43.0(2)  1_555 1_555 1_555 1_555 yes
   P(1)    Pd(1)   Ru(1)   C(4)    77.6(2)  1_555 1_555 1_555 1_555 yes
   P(1)    Pd(1)   Ru(1)   C(5)    83.8(4)  1_555 1_555 1_555 1_555 yes
   P(1)    Pd(1)   Ru(2)   C(11)   -74.6(2) 1_555 1_555 1_555 1_555 yes
   P(1)    Pd(1)   Ru(2)   C(12)   -97.8(2) 1_555 1_555 1_555 1_555 yes
   P(1)    Pd(1)   Ru(2)   C(13)   -58.6(6) 1_555 1_555 1_555 1_555 yes
   P(1)    Pd(1)   Ru(2)   C(14)   -13.1(2) 1_555 1_555 1_555 1_555 yes
   P(1)    Pd(1)   Ru(2)   C(15)   -37.3(2) 1_555 1_555 1_555 1_555 yes
   P(1)    C(39)   C(40)   C(41)   178.3(6) 1_555 1_555 1_555 1_555 yes
[truncated: 72,176 more chars]
